# Supplementary material
Source: PubMed Central journal article supplement (PMC4902595)
Supplement: supp_pp.16.00059_PP2016-00059DR2_Supplemental_Material.pdf [file supp_pp.16.00059_PP2016-00059DR2_Supplemental_Material.pdf]

1 Supplemental Data

2 Supplemental Figure S1. *OsDETI* deficiency accelerates the expression of *CDGs* and  
 3 *SAGs* during dark-induced leaf senescence

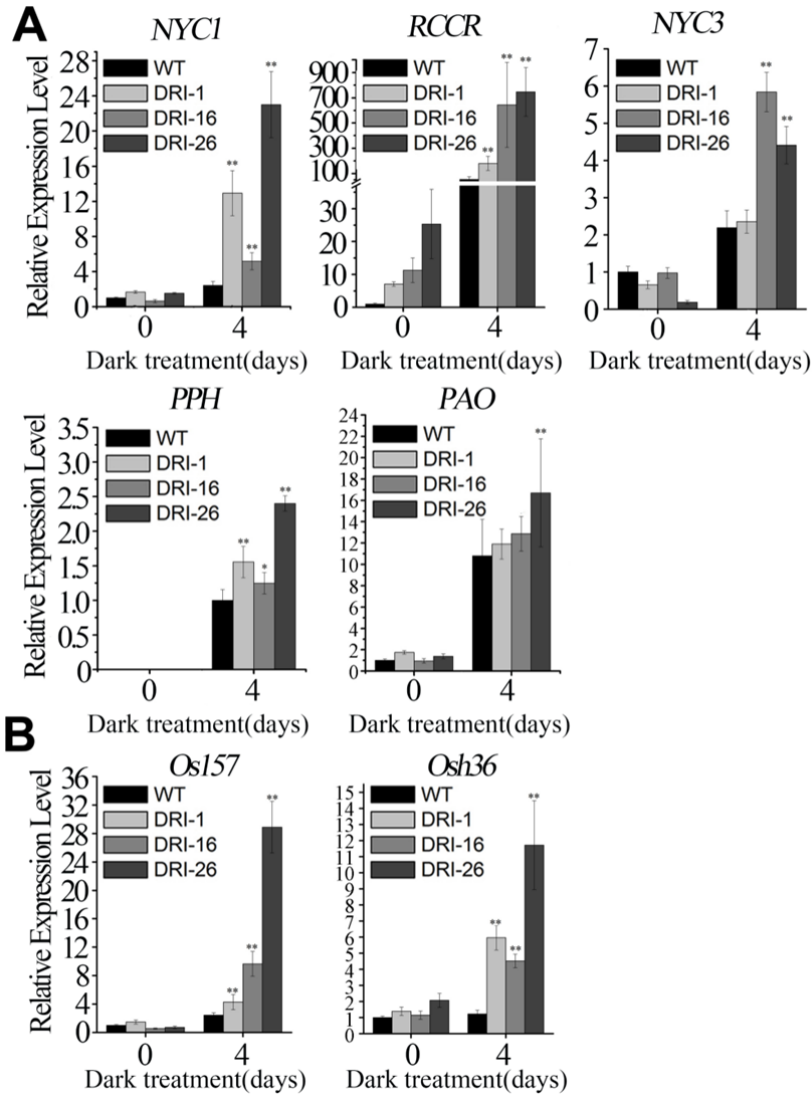

4

5 Figure S1. *OsDETI* deficiency accelerates the expression of *CDGs* and *SAGs* during  
 6 dark-induced leaf senescence

7 A, Expression of *CDGs* (*PAO*, *NYCI*, *NYC3*, *RCCR* and *PPH*) in WT and *OsDETI*  
 8 RNAi lines during dark incubation. B, Expression of *SAGs* (*Osh36* and *Os157*) in WT  
 9 plants and *OsDETI* RNAi lines during dark incubation. \*, P ≤ 0.05 (Student's t test),  
 10 \*\*, P ≤ 0.01 (Student's t test).

11

12 Supplemental Figure S2. Photosynthetic proteins degradation during dark-induced  
13 leaf senescence

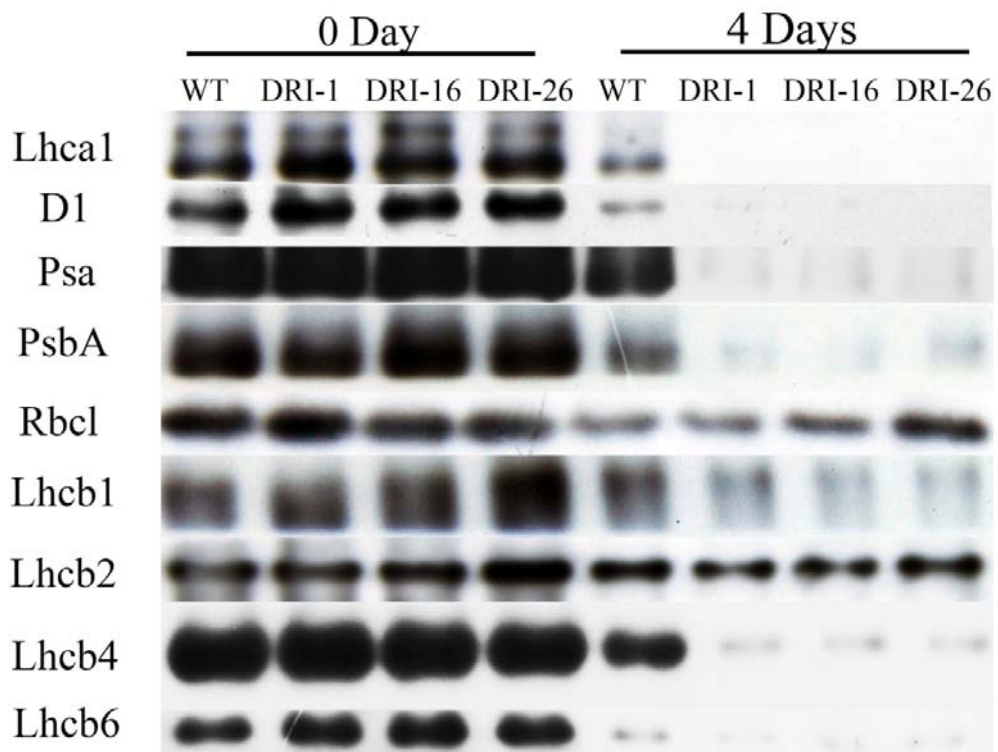

14  
15 Figure S2. Photosynthetic proteins degradation during dark-induced leaf senescence.  
16 A, Western blotting analysis of photosynthetic proteins from the detached leaves at 0  
17 day and 5 day after dark incubation.

18  
19  
20  
21  
22  
23  
24  
25  
26  
27

28 Supplemental Figure S3. The ultrastructural changes of chloroplast in *OsDETI* RNAi  
 29 lines and WT during dark incubation

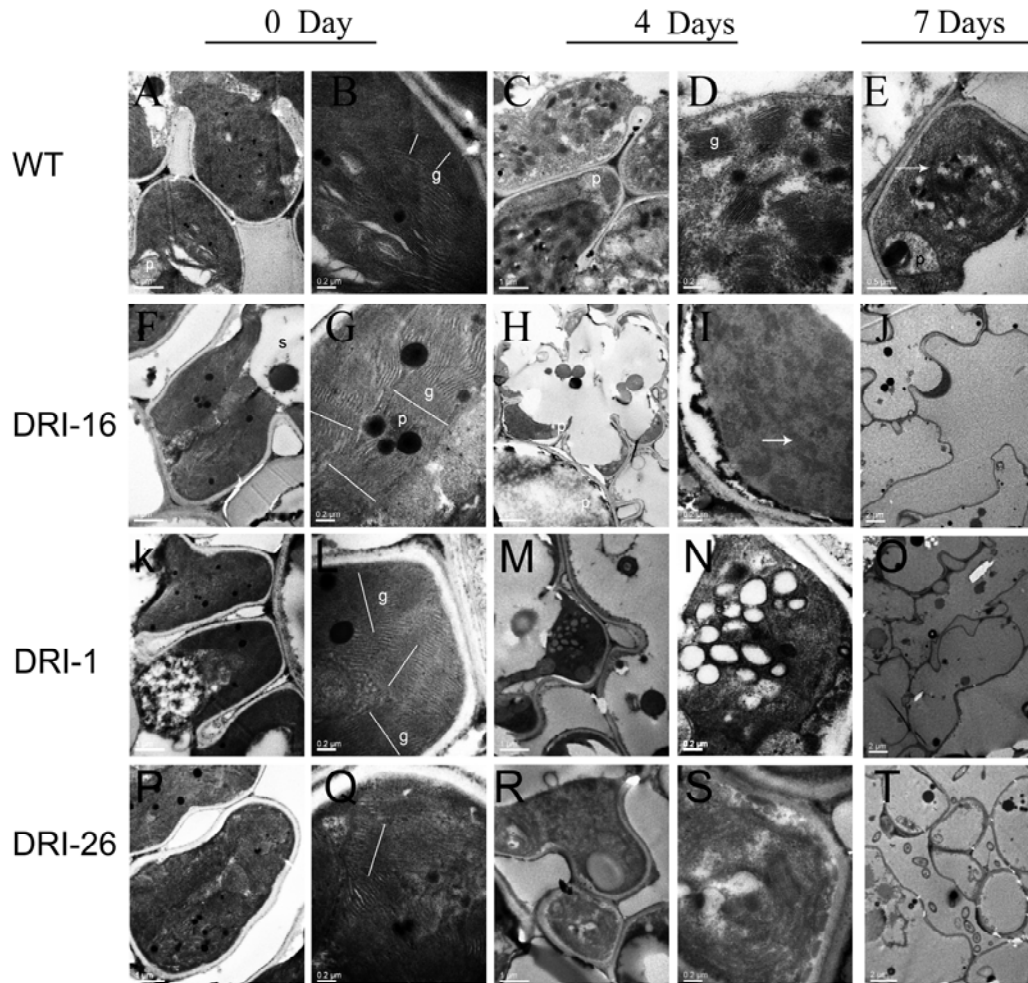

30

31 Figure S3. The ultrastructural changes of chloroplast in *OsDETI* RNAi lines and WT  
 32 during dark incubation.

33 A, A, F, K and P, the ultrastructure of chloroplasts in WT, DRI-16 DRI-1and DRI-26  
 34 from the penultimate leaves of tillering stage; B, B, G, L and Q, An enlarged partial  
 35 view of A, F, K and P; C, C, H, M and R, the ultrastructure of chloroplasts in WT,  
 36 DRI-16 DRI-1and DRI-26 after 4 days dark incubation; D, D, I, N and S, An enlarged  
 37 partial view of C, H, M and R; E, E, G, O and T, the ultrastructure of chloroplasts in  
 38 WT, DRI-16 DRI-1 and DRI-26 after 7 days dark incubation. g, grana; p,  
 39 plastoglobule; og, osmiophilic granules; s, starch granule. The arrowhead indicates  
 40 residual grana stacks; White lines indicates the width of grana stacks.

41 Supplemental Figure S4. Characterization of *OsDETI* RNAi plants at the late filling  
42 stage

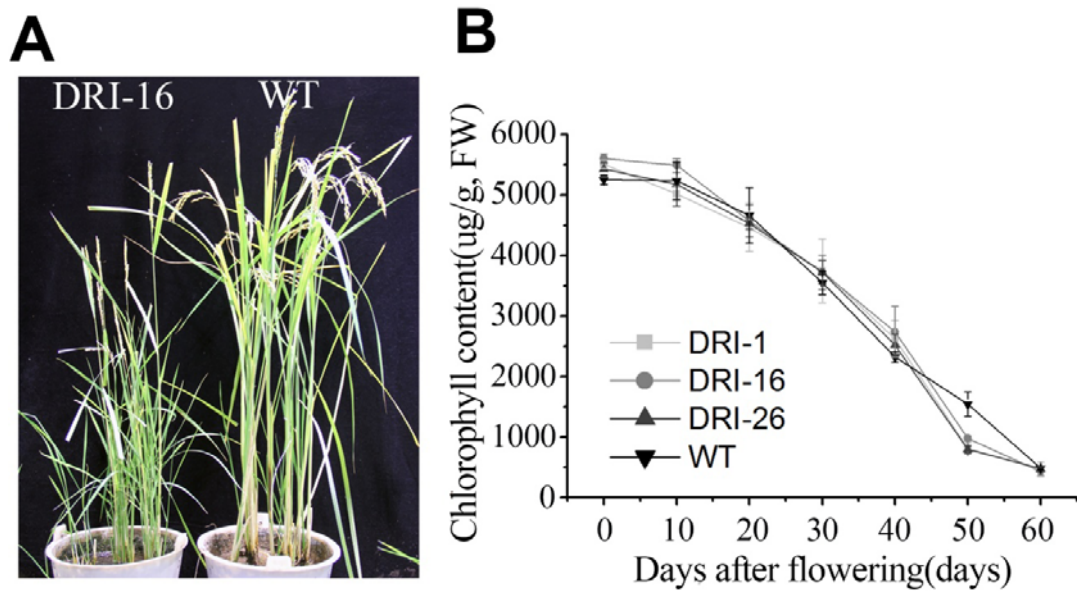

43

44 Figure S4. Characterization of *OsDETI* RNAi plants at the late filling stage.

45 A, Phenotype of *OsDETI* RNAi plants at the late filling stage.

46 B, Chlorophyll contents of the flag leaf in *OsDETI* RNAi lines and WT after  
47 flowering. Values are means  $\pm$  SD of 5 measurements. FW, fresh weight.

48

49

50

51

52

53

54

55

56

57

58

59 Supplemental Figure S5. Over Expression of *OsDETI* accelerates dark-induced leaf  
 60 senescence

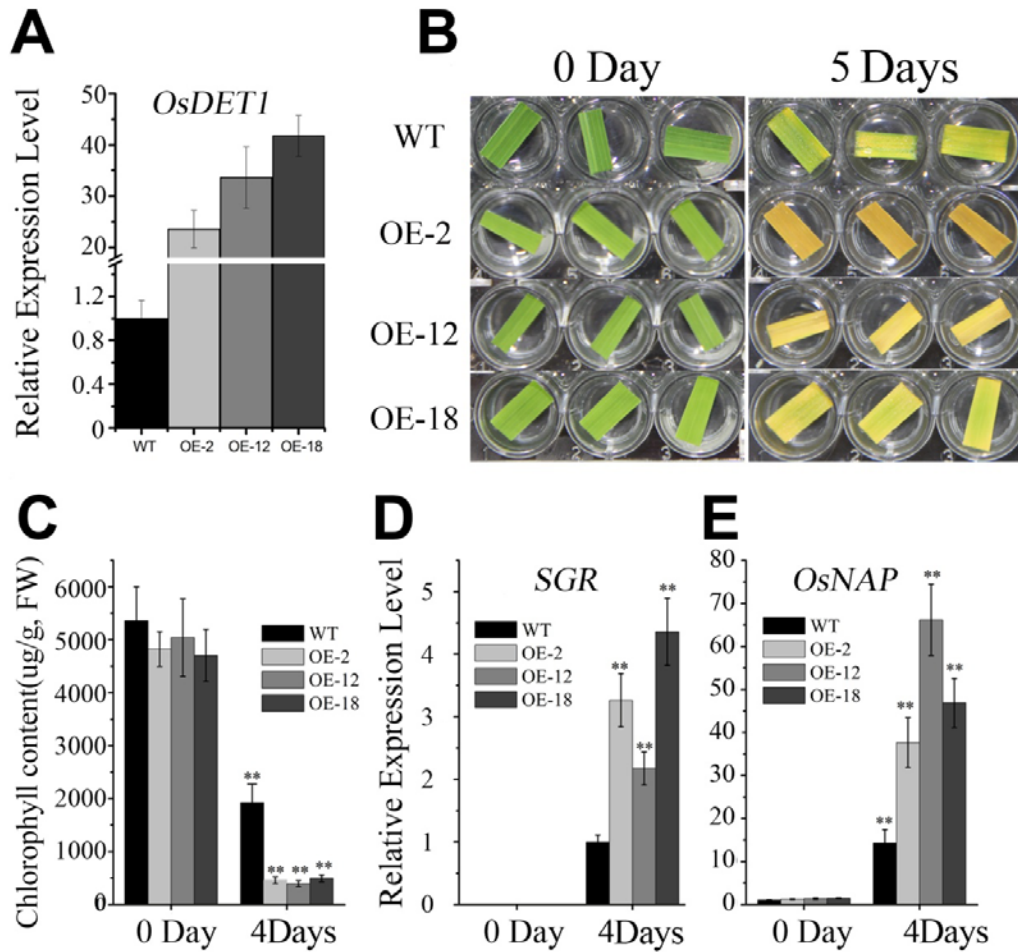

61

62 Figure S5. Over Expression of *OsDETI* accelerates dark-induced leaf senescence. The  
 63 penultimate leaves were detached and incubated with water in darkness at the tillering  
 64 stage. A, qRT-PCR analyzes the expression of *OsDETI* in OE-*OsDETI* lines and WT.  
 65 B, Over Expression of *OsDETI* accelerates dark-induced leaf senescence. C,  
 66 Chlorophyll contents in OE-*OsDETI* and WT plants during dark incubation. Values  
 67 are means  $\pm$  SD of 9 measurements. D and E, Expression of *SGR* and *OsNAP* in WT  
 68 and OE-*OsDETI* lines during the dark-induced. \*\*,  $P \leq 0.01$  (Student's t test).

69

70

71

72 Supplemental Figure S6. *OsDET1* deficiency and overexpressing *OsDET1-GFP*  
73 decrease the ABA content in leaf

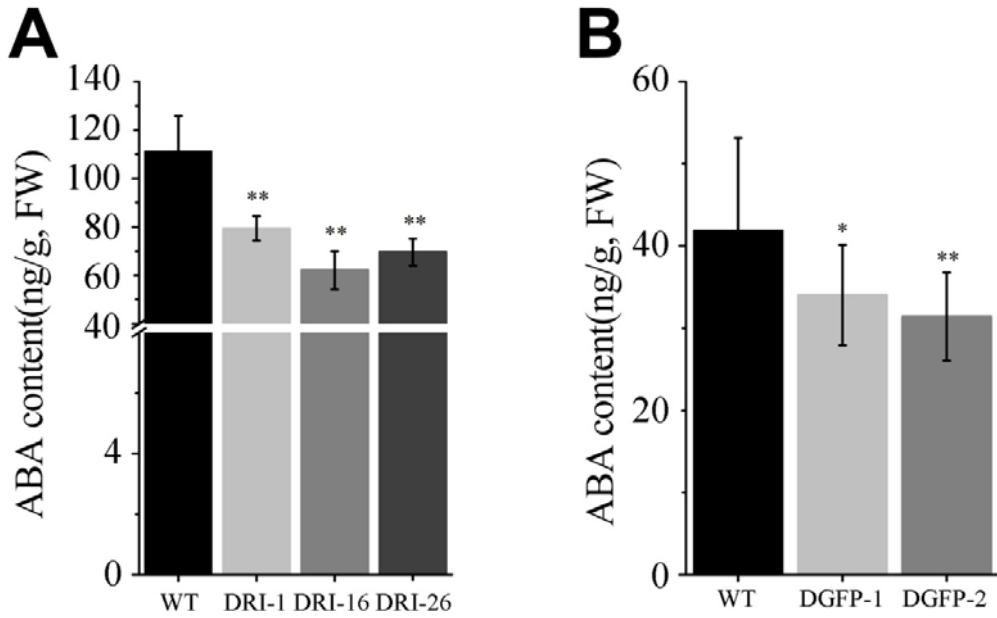

74

75 Figure S6. *OsDET1* deficiency and overexpressing *OsDET1-GFP* decrease the ABA  
76 content in leaves. A, The ABA content of flag leaves in *OsDET1* RNAi lines and WT  
77 after 35 days flowering. B, The ABA content of flag leaves in *OsDET1-GFP* plants  
78 and WT in tillering stage leaf. Values are means  $\pm$  SD of 3 measurements. FW, fresh  
79 weight. \*,  $P \leq 0.05$  (Student's t test), \*\*,  $P \leq 0.01$  (Student's t test).

80

81

82

83

84

85

86

87

88 Supplemental Figure S7. The ABA biosynthesis of *OsDET1* RNAi lines during dark  
 89 treatment

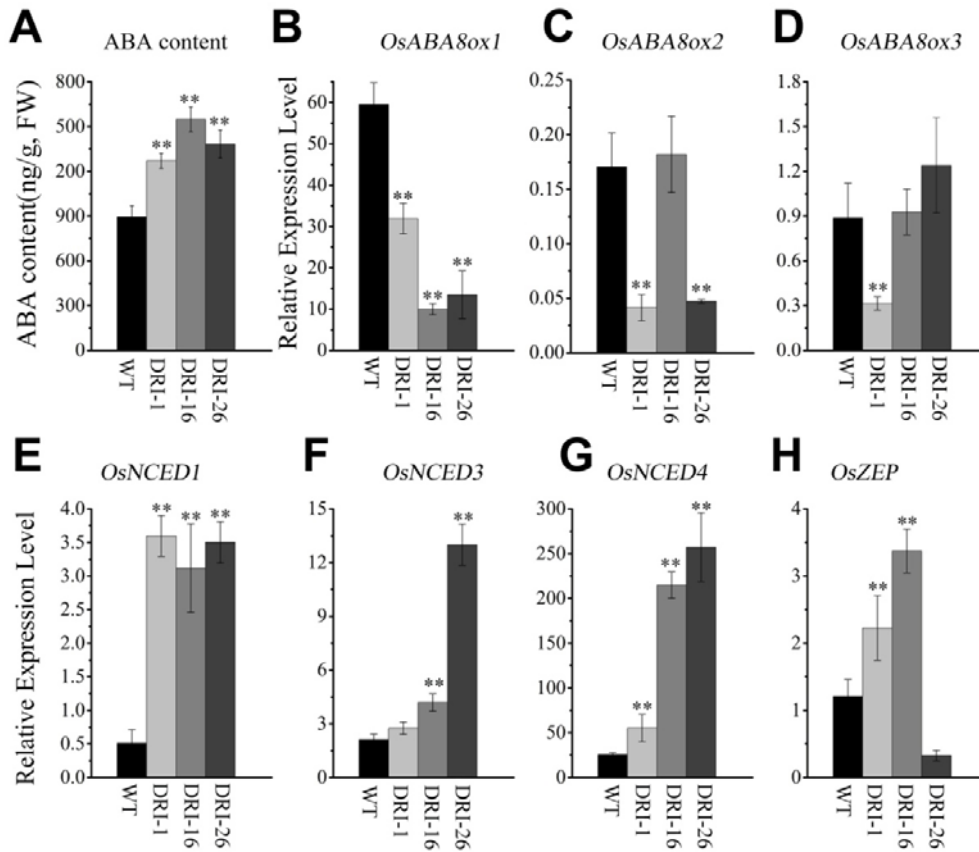

90  
 91 Figure S7. The ABA biosynthesis of *OsDET1* RNAi lines during dark treatment. A,  
 92 ABA content in WT and transgenic plants. The penultimate leaves of tillering stage  
 93 were detached and incubated with water in darkness four days. \*\*,  $P \leq 0.01$  (Student's  
 94 t test). B to D, Expression of ABA inactivation genes (*OsABA8ox1*, *OsABA8ox2* and  
 95 *OsABA8ox3*) in WT and *OsDET1* RNAi lines. \*\*,  $P \leq 0.01$  (Student's t test). E to H,  
 96 Expression of ABA biosynthesis genes (*OsNCED1*, *OsNCED3*, *OsNCED4* and  
 97 *OsZEP*) in WT and transgenic lines. \*\*,  $P \leq 0.01$  (Student's t test).

98  
 99  
 100



101 Supplemental Figure S8. OsDET1 interacts with the candidate proteins both in vivo

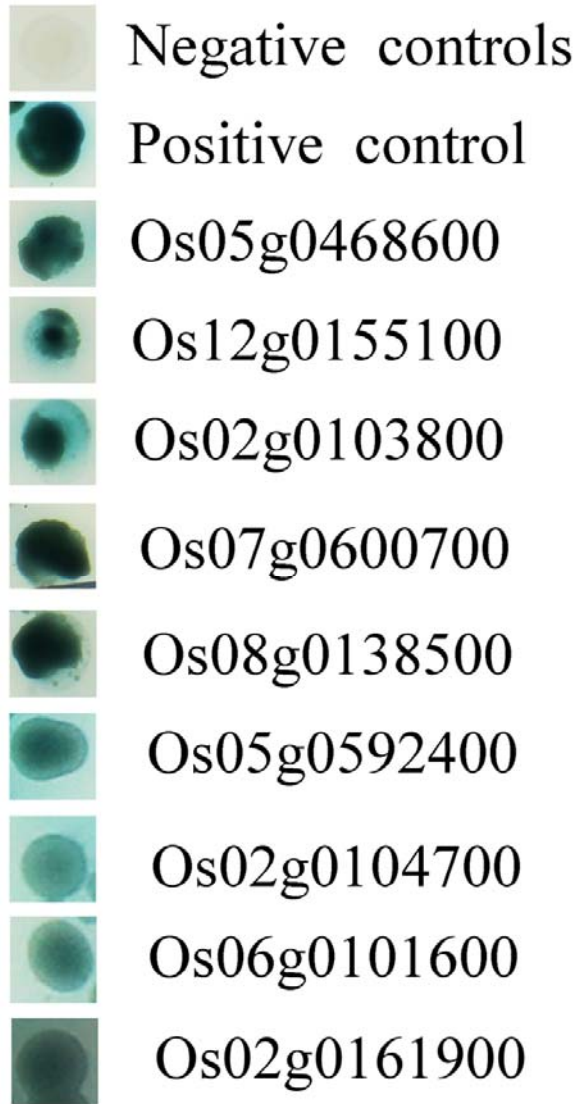

102

103 Figure S8. OsDET1 interacts with the candidate proteins both in vivo.  
104 pGAD-candidate proteins and pGBK-*OsDET1* plasmid were co-transformed into  
105 Y2H yeast cells incubation on QDO/X/A medium containing 3-AT 3days. Mating of  
106 Y2HGold (pGBKT7-53) and Y187 (pGADT7-T) was the positive control, Mating of  
107 Y2HGold (pGBKT7-Lam) and Y187 (pGADT7-T) as the negative control.

108



109 Supplemental Figure S9. *OsDETI* deficiency leads to pleiotropic phenotypes in  
110 *OsDETI* RNAi lines

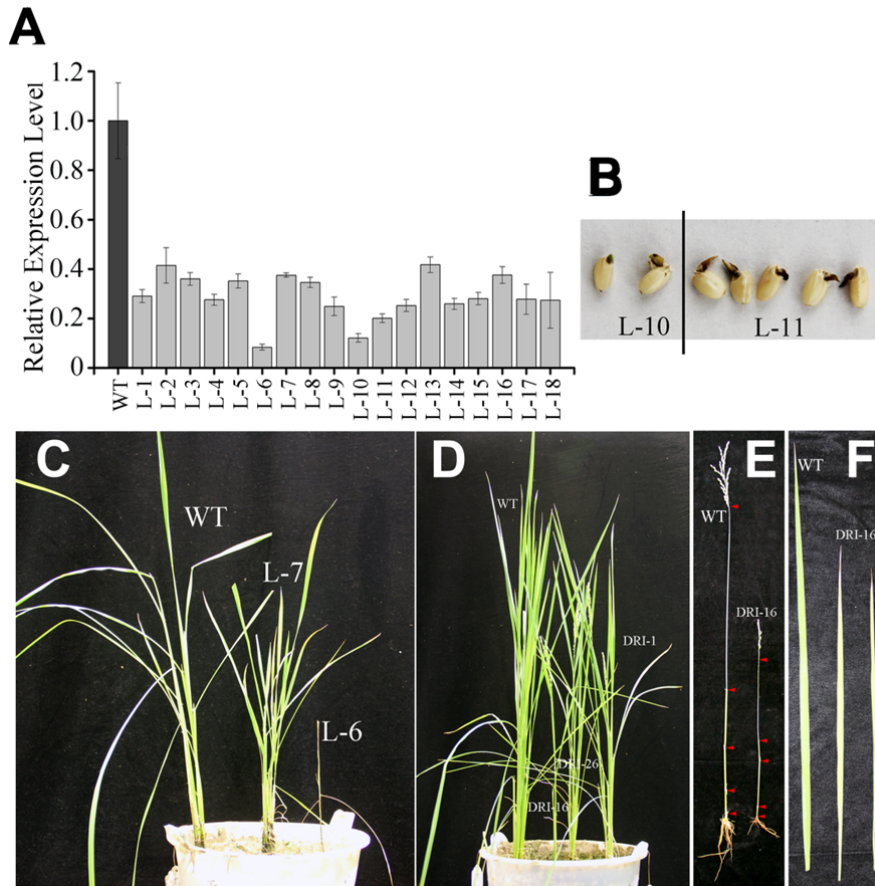

111

112 Figure S9. *OsDETI* deficiency leads to pleiotropic phenotypes in *OsDETI* RNAi  
113 lines.

114 A, The transcriptional level of *OsDETI* in T0 *OsDETI* RNAi transgenic lines. The  
115 penultimate leaf at the tillering stage was tested. Values are means  $\pm$  SD of 3  
116 measurements. B, Excessive RNAi treatment lead to the T1 seeds of L-10 and L-11  
117 cannot germinate. C, Phenotypes of T0 *OsDETI* RNAi plants in the vegetative growth  
118 stage. *OsDETI* RNAi lines showed a dwarf phenotype compared with WT (L-7 and  
119 L-6). Excessive RNAi treatment caused L-6 death in vegetative growth stage. D,  
120 Phenotypes of *OsDETI* RNAi plants in flowering stage. E, The length of *OsDETI*  
121 RNAi plants and WT main culm. F, The length of *OsDETI* RNAi plants and WT flag  
122 leaf.

123 Supplemental Figure S10. Overexpressing *OsDET1* caused pleiotropic phenotypes  
124 in OE-*OsDET1* plants

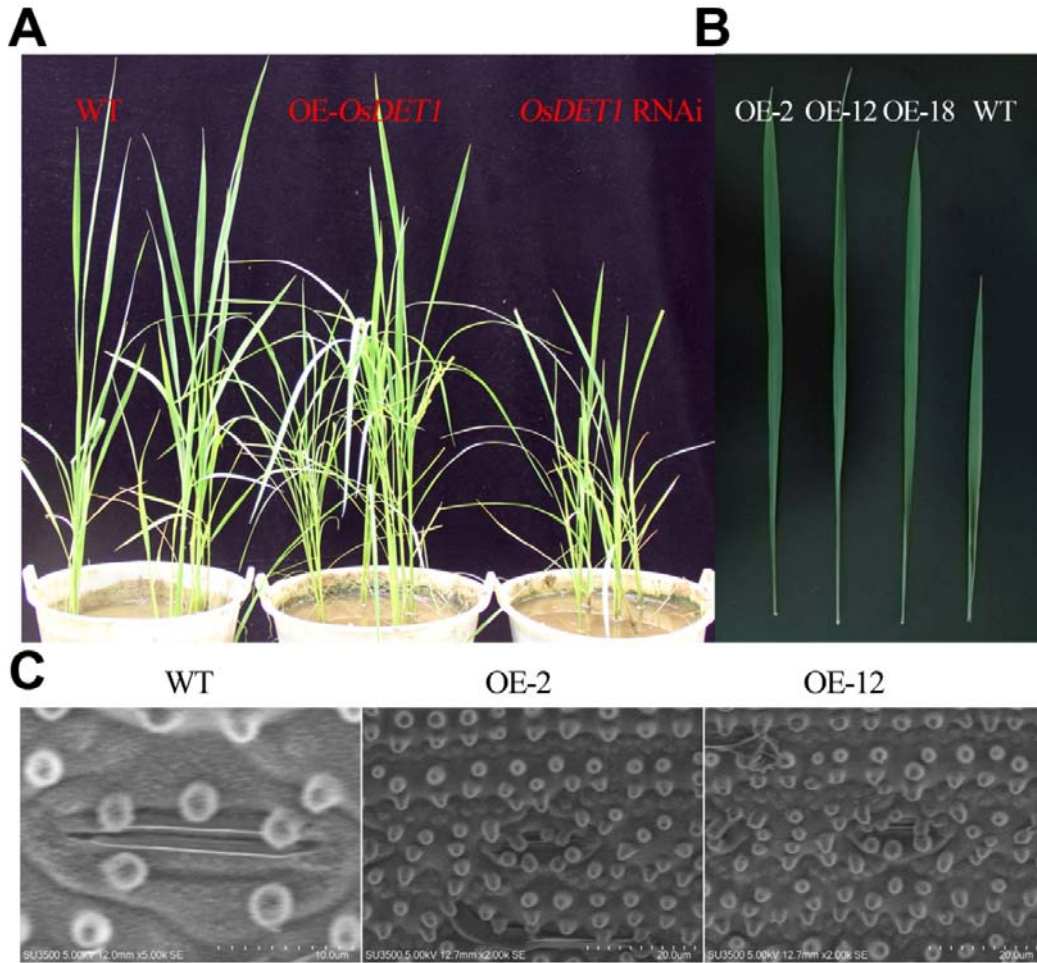

125

126 Figure S10. Overexpressing *OsDET1* caused pleiotropic phenotypes in  
127 OE-*OsDET1* plants.

128 A, Phenotypes of OE-*OsDET1* plants in flowering stage. OE-*OsDET1* plants lines  
129 showed a drooping leaf phenotype. B, The length of OE-*OsDET1* plants and WT  
130 flag leaf. C, Stomatal aperture and wax crystallization were observed by scanning  
131 electron microscope. More wax crystallization existed on the OE-*OsDET1* plants  
132 stomatal aperture than WT.

133

134

135

136

137 Supplemental Figure S11. Different function of overexpressing *OsDET1-GFP* or  
138 *OsDET1* in pollination and fertilization processes in the flower

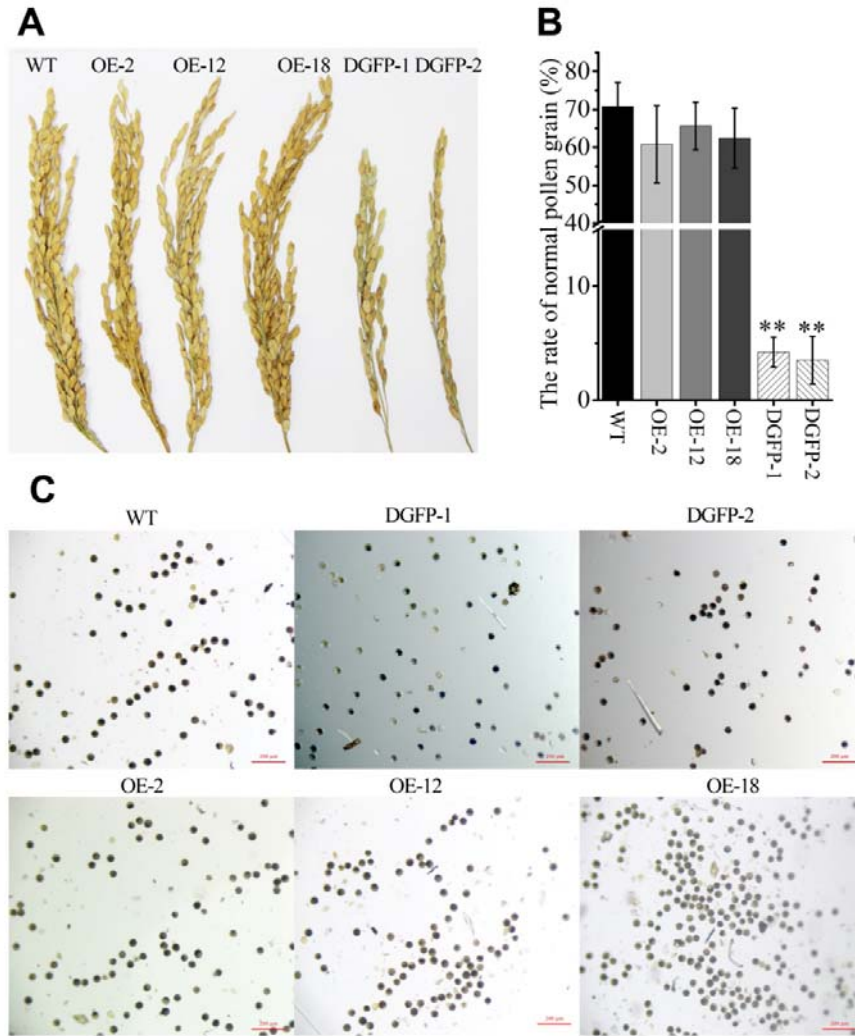

139

140 Figure S11. Different function of overexpressing *OsDET1-GFP* or *OsDET1* in  
141 pollination and fertilization processes in the flower.

142 A, Spikelets from WT, *OsDET1-GFP* and OE-*OsDET1* lines showed that  
143 overexpressing *OsDET1-GFP* caused infertile spikelets. B and C, Pollen grains  
144 morphology analysis showed the pollen grains of *OsDET1-GFP* plants under ABA  
145 stress. Pollen grains were isolated from WT, *OsDET1-GFP* and OE-*OsDET1* plants  
146 and tested under the microscope. Three photographs were used for statistic analysis.  
147 Representative graphs are shown. \*\*,  $P \leq 0.01$  (Student's t test). Bar = 200  $\mu\text{m}$ .

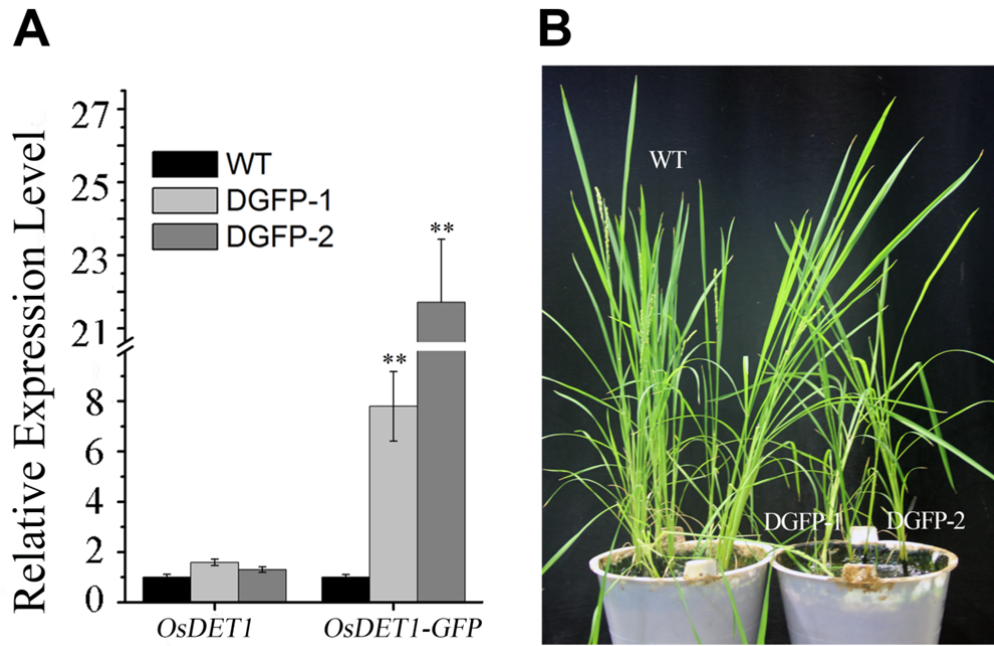

149

150 Figure S12. Phenotype of *OsDET1-GFP* plant.

151 A, The expression level of *OsDET1-GFP* and endogenous *OsDET1* in *OsDET1-GFP*  
152 plants and WT. B, The phenotypes of *OsDET1-GFP* plants. \*\*,  $P \leq 0.01$  (Student's t  
153 test).

154

155

156

157

158

159

160

161

162

163 Supplemental Figure S13. Overexpressing *OsDET1-GFP* accelerates ABA-induced  
 164 leaf senescence

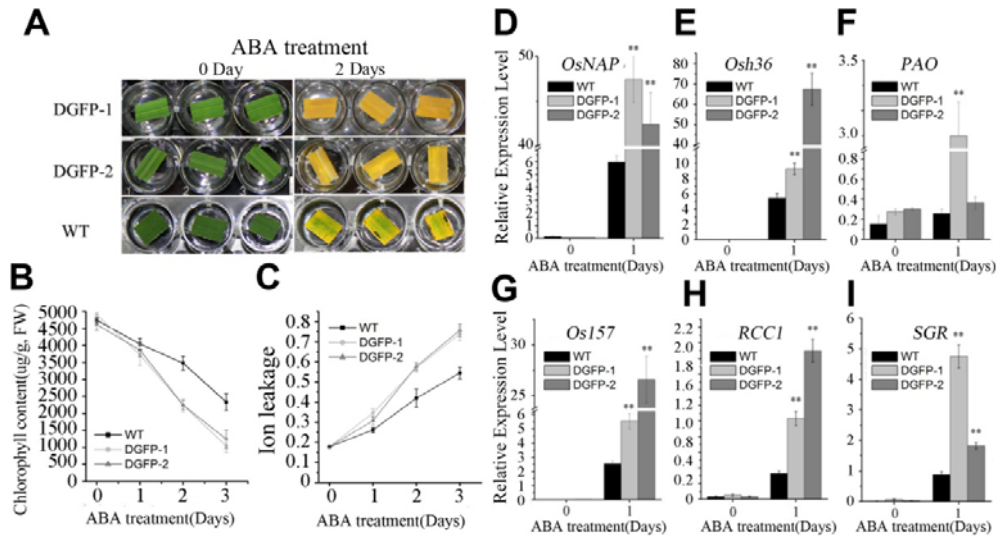

165

166 Figure S13. Overexpressing *OsDET1-GFP* accelerates ABA-induced leaf senescence.  
 167 The penultimate leaves were detached and incubated with water containing 50  $\mu$ M  
 168 ABA in light, no added ABA as control. A to C, Analysis of the leaves senescence  
 169 syndromes demonstrated that overexpressing *OsDET1-GFP* promotes ABA-induced  
 170 leaf senescence. D to I, Expression of *CDGs* and *SAGs* in WT and *OsDET1-GFP*  
 171 plants after treatment with 50  $\mu$ M ABA. \*\*,  $P \leq 0.01$  (Student's t test).

172

173

174

175

176

177

178

179



180 Supplemental Figure S14. Overexpressing *OsDET1-GFP* accelerates dark-induced  
 181 leaf senescence in rice

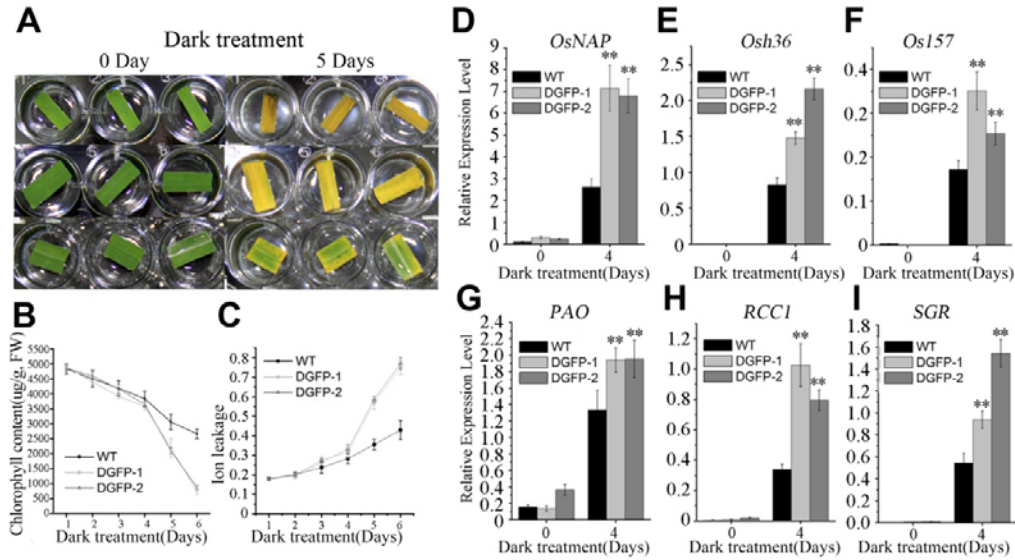

182

183 Figure S14. Overexpressing *OsDET1-GFP* accelerates dark-induced leaf senescence  
 184 in rice. The penultimate leaves were detached and incubated with water in darkness at  
 185 the tillering stage. A to C, Analysis of the leaves senescence syndromes demonstrated  
 186 that overexpressing *OsDET1-GFP* promotes dark-induced leaf senescence. D to I,  
 187 Expression of *CDGs* and *SAGs* in WT and *OsDET1-GFP* plants after dark treatment.  
 188 \*\*,  $P \leq 0.01$  (Student's t test).

189

190

---

191 VTOC Icon

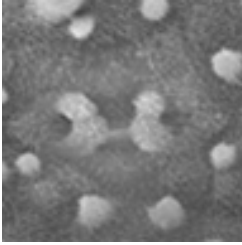

192

193 The contradictory ABA-related phenotypes of *OsDET1* RNAi plants leaf, stoma  
194 was closure, but wax crystallization and accumulation are weakened in normal  
195 condition.

196

197

198

199

200

201

202

203

204

205

206

207

208

209

210

211

212

213

214

215



216 Supplemental Table S1

217

Agronomic traits of *OsDET1* RNAi lines

| Plant type, line                   | WT         | DRI-1         | DRI-16        | DRI-26       |
|------------------------------------|------------|---------------|---------------|--------------|
| Shoot height, cm                   | 126.4±6.4  | 81.6±4.6**    | 73.4±6.3**    | 80.8±9.9**   |
| The number of tillers              | 7.2±1.3    | 4±0.7**       | 3.6±0.5**     | 3.8±0.8**    |
| The number of leaves               | 12.2±0.8   | 9.2±0.8**     | 9±0.7**       | 9.2±0.8**    |
| The number of panicles             | 5.6±1.3    | 3.8±0.8**     | 2.8±0.4**     | 3.2±0.8**    |
| Dry weight of vegetative organs, g | 18.36±1.5  | 12.76±0.8**   | 9.96±1.8**    | 10.78±3.1**  |
| The number of primary branches     | 11.7±1.5   | 4.7±0.58**    | 6.7±1.2**     | 6.7±1.5**    |
| The number of spikelets            | 108.3±19.5 | 41.3±9**      | 50.3±8.6**    | 59±8**       |
| The secondary branches             | 86±11.4    | 33.7±5.5**    | 40.7±6**      | 46.7±9.5**   |
| The ratio of fertile spikelets     | 0.783±0.03 | 0.438±0.091** | 0.154±0.047** | 0.214±0.156* |

218 Data were collected from samples at maturity. Values are means ± SD from at least 5  
 219 plants. \*,  $P \leq 0.05$  (Student's t test), \*\*,  $P \leq 0.01$  (Student's t test).

220

## 221 Supplemental Table S2

222

## Primers used in this study

|                                                | Forward primers                 | Reverse primers                    |
|------------------------------------------------|---------------------------------|------------------------------------|
| Primers used for qRT-PCR                       |                                 |                                    |
| OsDET1-1 ( <i>OsDET1</i> and <i>DET1-GFP</i> ) | TGGTAGTGTGGATGGAGGGG            | CGATGAATTTTGTGGATTTGTGT            |
| OsDET1-2 (endogenous <i>OsDET1</i> )           | CAGATTCTGGTGCTTCTGACAG          | TCCTACTACAAGCGGCCAAA               |
| OsNAP                                          | CAAGAAGCCGAACGGTTC              | GTTAGAGTGGAGCAGCAT                 |
| PAO                                            | GGAAATCCTAGCCAAGAAGTGTG         | CGCAGGAATCCCAGCAGTT                |
| PPH                                            | CGAGAGAGGTCGTTGGTGAT            | CGATAACCCCTGGTCCTCCT               |
| NYC1                                           | CATGCAACACCAACAAAAGG            | GACCATTCCAGGAGAAGCAG               |
| NYC3                                           | TGTCGTTGCCATGTGAAGAT            | TTGGTCACGCCACAAATCTA               |
| SGR                                            | AGGGGTGGTACAACAAGCTG            | GCTCCTTGCGGAAGATGTAG               |
| RCCR1                                          | CGCATTTCTCATGGAATTT             | CTTCTACGCTGTTGTCCA                 |
| Osh36                                          | GCACGGAGGCGAACGA                | TTGAGCGGTAGCACCCATT                |
| OsI57                                          | ACCCTAAAGTAAATGAAGTC            | CCTGCTCTTGCTTTGTTA                 |
| OsNCED1                                        | ACCATGAAGTCCATGAGGCT            | TCTCGTAGTCTTGGTCTTGG               |
| OsNCED2                                        | ATGGAAACGAGGATAGTGGT            | CTTATTGTTGTGCGAGAAGT               |
| OsNCED3                                        | CTCCCAAACCATCCAAACCG            | TGAGCATATCCTGGCGTCGT               |
| OsZEP                                          | GGATGCCATTGAGTTTGGTT            | TGGCTGACTGAAGTCTCTCG               |
| OsABA8ox1                                      | AAGCTGGCAAAACCAACATC            | CCGTGCTAATACGGAATCCA               |
| OsABA8ox2                                      | CTACTGCTGATGGTGGCTGA            | CCCATGGCCTTTGCTTTAT                |
| OsABA8ox3                                      | AGTACAGCCCATTCCCTGTG            | ACGCCTAATCAAACCATTGC               |
| OsPYL5                                         | CACCGCCTCAGGAATACTC             | TGCTAGCCGCTCTGATACTT               |
| RAB16A                                         | GCTCAAGCTCGCTGAGGAT             | CATGATGCCCTTCTTCTCG                |
| LIP9                                           | AGAAGAAGGGCTTCTCAGC             | TCTCCATGATCTTGCCAGT                |
| LEA3                                           | AAGGACAAGACCTCCAGCAC            | GATGGCAGAGTCTTGGTGT                |
| Primers used for yeast two-hybrid assays       |                                 |                                    |
| DET1- pGBKT7                                   | <u>CCCGGGT</u> ATGAGCGTGTGGAATA | <u>CCTCGAGCGT</u> GCAATCTAGTCAGCTC |

---

|                                         |                                         |                                              |
|-----------------------------------------|-----------------------------------------|----------------------------------------------|
| DDB1- pGADT7                            | CCCGGGTATGAGCGTGTGGA ACTA               | CCTCGAGCGTGAATCTAGTCAGCTC                    |
| COP10- pGADT7                           | GGAGGCCAGTGAATTCATGTCGTCGCTTCCTC        | CGAGCTCGATGGATCCCTATCTTGCAAACCTC<br>AT       |
| PGADT7-OsDDA1                           | GGAGGCCAGTGAATTCATGGAGAGCTCCCTGGG       | CGAGCTCGATGGATCCTTAGCTTCTACCACTT             |
| PGBKT7-PYL5                             | C<br>GGAGGCCAGTGAATTCGGCGACCTCGAGATC    | GC<br>GGATCCCCGGGAATTCCTACTGTTCAAGTGGC<br>GA |
| Primers used to generate DNA constructs |                                         |                                              |
| POsDET1::GUS                            | <u>GGAAATCCGATCTCCTAGAAAGCGA</u>        | <u>CCCAAGCTTGGGACCGGGCCGCCCGTA</u>           |
| DET1-RNAi                               | <u>CACCAAATGTTGTCAAATTC AAG</u>         | AACCCACATTTTTCCTTTGC                         |
| Primers used for BiFc assays            |                                         |                                              |
| DDB1-bifc                               | CTCTAGAATGAGCGTGTGGA ACTACGT            | CTCTAGAGTGAATCTAGTCAGC                       |
| pAB855-OsDDA1                           | GGACCTGCTTTCTAGAATGGAGAGCTCCCTGGG<br>C  | ATCCCTCGAGTCTAGAGCTTCTACCACTTGCA<br>GT       |
| pAB862-OsDDA1                           | AAATCTCGAGGGATCCATGGAGAGCTCCCTGGG<br>C  | ATCTTCTAGAGGATCCGCTTCTACCACTTGCA<br>GT       |
| pAB855-COP10                            | GGACCTGCTTTCTAGAATGTCGTCGCTTCCTC        | ATCCCTCGAGTCTAGATCTTGCAAACCTCATC<br>GT       |
| pAB862-COP10                            | AAATCTCGAGGGATCCATGTCGTCGCTTCCTC        | ATCTTCTAGAGGATCCTCTTGCAAACCTCATC<br>GT       |
| pAB862-PYL5                             | AAATCTCGAGGGATCCATGGTGGGGCTTG TGGG<br>A | ATCTTCTAGAGGATCCCTGTTCAAGTGGCGA              |
| pAB855-PYL5                             | GGACCTGCTTTCTAGAATGGTGGGGCTTG TGGG<br>A | ATCCCTCGAGTCTAGACTGTTCAAGTGGCGA              |
| DET1-bifc                               | <u>CCCTCGAGGGTGATGGCGACCTTCTTC</u>      | <u>GCTCTAGATCTCCTGAAATGTAAAT</u>             |

---

223 The underlined nucleotides indicate the restriction sites for cloning.

224

225

226

227

228

229

230

---

231 Supplemental Table S3

232 Summary of the mRNA Sequencing Data Mapping

| Sample   | Total number of reads | Mapped reads | Percentage | Splice reads | Non-splice reads | Splice reads |
|----------|-----------------------|--------------|------------|--------------|------------------|--------------|
| DRI-16-1 | 34274434              | 23926487     | 82.63%     | 7874709      | 15635677         | 27.20%       |
| DRI-16-2 | 26205124              | 29864881     | 84.86%     | 9953791      | 19410410         | 28.28%       |
| DRI-16-3 | 30599052              | 25633444     | 83.65%     | 8244120      | 16631681         | 26.90%       |
| WT-1     | 28956202              | 28276217     | 82.50%     | 9284867      | 18552438         | 27.09%       |
| WT-2     | 35193620              | 21878669     | 83.49%     | 7394838      | 14147137         | 28.22%       |
| WT-3     | 30642944              | 25565460     | 83.55%     | 8403048      | 16501889         | 27.46%       |

233

234

235

236

237

238

239

240

241

242

243

244

245

246

247

248

249

250

251

252

253

254 Supplemental Table S4

255 Transcriptome analysis identified 4752 differentially expressed genes (DEGs) in  
 256 DRI-16 transgenic plants.

| Gene               | Readcount           |           | log2FoldChange | Padj     |
|--------------------|---------------------|-----------|----------------|----------|
|                    | ReadcountDR<br>I-16 | WT        |                |          |
| EPIOSAG00000002353 | 21.5148             | 5.84919   | 1.879          | 0.01169  |
| EPIOSAG00000002380 | 129.37587           | 65.15192  | 0.98969        | 0.00207  |
| EPIOSAG00000002712 | 3.85185             | 15.90201  | -2.0456        | 0.02804  |
| EPIOSAG00000003986 | 1.0939              | 9.70527   | -3.1493        | 0.03398  |
| EPIOSAG00000004225 | 570.76328           | 319.55301 | 0.83684        | 0.00058  |
| EPIOSAG00000004903 | 0.79442             | 9.76084   | -3.619         | 0.01596  |
| EPIOSAG00000005842 | 102.50793           | 205.36347 | -1.0024        | 0.00035  |
| EPIOSAG00000005887 | 137.11582           | 83.63819  | 0.71316        | 0.03291  |
| EPIOSAG00000006543 | 32.68951            | 5.95269   | 2.4572         | 4.16E-05 |
| EPIOSAG00000007153 | 163.26195           | 58.69488  | 1.4759         | 1.63E-06 |
| EPIOSAG00000009199 | 3.90449             | 15.33634  | -1.9737        | 0.03911  |
| EPIOSAG00000009498 | 18.06016            | 3.75084   | 2.2675         | 0.00577  |
| EPIOSAG00000009699 | 103.34752           | 30.32338  | 1.769          | 1.29E-07 |
| EPIOSAG00000011276 | 0                   | 5.42942   |                | 0.04116  |
| EPIOSAG00000011365 | 40.35062            | 18.2296   | 1.1463         | 0.03354  |
| EPIOSAG00000014137 | 79.5347             | 35.47754  | 1.1647         | 0.00212  |
| EPIOSAG00000015273 | 152.03076           | 51.65096  | 1.5575         | 7.31E-08 |
| EPIOSAG00000015379 | 0                   | 59.01322  |                | 3.60E-05 |
| EPIOSAG00000017252 | 141.85502           | 88.60339  | 0.67898        | 0.04318  |
| EPIOSAG00000018034 | 3.12883             | 15.16804  | -2.2773        | 0.02011  |
| EPIOSAG00000019347 | 48.0431             | 24.26703  | 0.98533        | 0.04692  |
| EPIOSAG00000019565 | 0                   | 8.01943   |                | 0.00527  |
| EPIOSAG00000020549 | 0                   | 12.04956  |                | 0.00029  |

---

|                    |            |            |          |          |
|--------------------|------------|------------|----------|----------|
| EPIOSAG00000020593 | 170.50202  | 258.70328  | -0.60151 | 0.03086  |
| EPIOSAG00000022933 | 2236.01771 | 1338.44113 | 0.74038  | 0.00027  |
| EPIOSAG00000023190 | 13.13318   | 36.93398   | -1.4917  | 0.00744  |
| EPIOSAG00000025431 | 22.81673   | 0.86334    | 4.724    | 0.00452  |
| EPIOSAG00000025532 | 41.73772   | 85.43463   | -1.0335  | 0.00642  |
| EPIOSAG00000025985 | 0          | 5.98588    |          | 0.02656  |
| EPIOSAG00000026988 | 8.82392    | 0.30688    | 4.8457   | 0.00766  |
| EPIOSAG00000030717 | 63.85152   | 22.10254   | 1.5305   | 0.00032  |
| EPIOSAG00000034295 | 14.97642   | 3.25918    | 2.2001   | 0.02205  |
| EPIOSAG00000044503 | 24.84037   | 0          |          | 2.13E-07 |
| EPIOSAG00000047708 | 77.99586   | 23.86217   | 1.7087   | 5.77E-06 |
| EPIOSAG00000047748 | 54.12784   | 11.82585   | 2.1944   | 1.14E-06 |
| EPIOSAG00000048487 | 6.34291    | 0          |          | 0.00821  |
| EPIOSAG00000049360 | 58.27794   | 28.95538   | 1.0091   | 0.02755  |
| EPIOSAG00000050096 | 94.61135   | 53.79338   | 0.81458  | 0.02319  |
| EPIOSAG00000050745 | 5.89433    | 0.24957    | 4.5618   | 0.04769  |
| OS01G0101700       | 3088.45798 | 1581.34672 | 0.96573  | 0.00043  |
| OS01G0101800       | 130.83191  | 29.72058   | 2.1382   | 6.72E-12 |
| OS01G0104350       | 32.85988   | 62.77792   | -0.93393 | 0.04316  |
| OS01G0104400       | 3208.14573 | 2086.13081 | 0.62091  | 0.0032   |
| OS01G0104800       | 42.93441   | 89.43347   | -1.0587  | 0.00385  |
| OS01G0105400       | 85.11809   | 159.46877  | -0.90574 | 0.00241  |
| OS01G0106600       | 72.07291   | 129.21034  | -0.84219 | 0.02987  |
| OS01G0106900       | 5720.08321 | 2384.98605 | 1.2621   | 9.45E-12 |
| OS01G0107000       | 433.20198  | 279.30485  | 0.6332   | 0.0099   |
| OS01G0108400       | 217.4632   | 4.47733    | 5.602    | 1.93E-06 |
| OS01G0108500       | 102.47328  | 0          |          | 2.92E-07 |

---

---

|              |            |            |          |          |
|--------------|------------|------------|----------|----------|
| OS01G0108600 | 1317.04327 | 407.58916  | 1.6921   | 4.70E-18 |
| OS01G0108800 | 333.1782   | 71.68353   | 2.2166   | 3.50E-05 |
| OS01G0109000 | 1145.25079 | 807.11012  | 0.50483  | 0.03742  |
| OS01G0109500 | 3.45841    | 18.42912   | -2.4138  | 0.00637  |
| OS01G0110100 | 157.24356  | 45.08907   | 1.8022   | 2.95E-07 |
| OS01G0112300 | 93.55876   | 154.9246   | -0.72762 | 0.02122  |
| OS01G0112400 | 22.7854    | 5.52008    | 2.0453   | 0.00511  |
| OS01G0114300 | 568.83962  | 320.86633  | 0.82605  | 0.0002   |
| OS01G0115100 | 195.31369  | 114.43872  | 0.77122  | 0.00955  |
| OS01G0117266 | 108.35084  | 171.00294  | -0.65831 | 0.02859  |
| OS01G0118400 | 140.72316  | 344.65911  | -1.2923  | 5.80E-08 |
| OS01G0118700 | 369.17207  | 750.85424  | -1.0242  | 2.79E-06 |
| OS01G0120500 | 1912.6263  | 1304.41157 | 0.55216  | 0.0103   |
| OS01G0120800 | 473.71067  | 725.37972  | -0.61473 | 0.00623  |
| OS01G0122000 | 254.76319  | 66.85826   | 1.93     | 1.74E-14 |
| OS01G0123700 | 52.83079   | 3.44033    | 3.9408   | 4.07E-05 |
| OS01G0123800 | 29.28862   | 0.99829    | 4.8747   | 8.50E-06 |
| OS01G0123900 | 6228.37576 | 341.5476   | 4.1887   | 6.67E-07 |
| OS01G0124000 | 1388.34262 | 20.32235   | 6.0942   | 2.78E-07 |
| OS01G0124200 | 802.96058  | 109.71206  | 2.8716   | 0.01256  |
| OS01G0126200 | 1315.00863 | 1893.54062 | -0.52601 | 0.02327  |
| OS01G0127600 | 153.50757  | 3.31839    | 5.5317   | 0.00037  |
| OS01G0127700 | 159.84611  | 251.91555  | -0.65626 | 0.0221   |
| OS01G0128100 | 14.84481   | 1.51218    | 3.2953   | 0.0008   |
| OS01G0128800 | 1631.83294 | 765.34591  | 1.0923   | 3.66E-08 |
| OS01G0130000 | 74.40346   | 171.04909  | -1.201   | 0.0126   |
| OS01G0130200 | 903.64719  | 169.12689  | 2.4177   | 6.20E-07 |

---



---

|              |            |            |          |           |
|--------------|------------|------------|----------|-----------|
| OS01G0132000 | 398.85928  | 8.98816    | 5.4717   | 0.00029   |
| OS01G0133500 | 213.16081  | 105.61689  | 1.0131   | 0.00015   |
| OS01G0134700 | 101.28995  | 519.55878  | -2.3588  | 3.00E-10  |
| OS01G0135600 | 40.37937   | 115.11785  | -1.5114  | 2.90E-06  |
| OS01G0136700 | 1.56631    | 12.408     | -2.9858  | 0.01172   |
| OS01G0137700 | 3.18525    | 99.51527   | -4.9654  | 8.71E-06  |
| OS01G0137800 | 38.40854   | 702.80358  | -4.1936  | 4.66E-06  |
| OS01G0137875 | 2.01616    | 77.46776   | -5.2639  | 8.75E-12  |
| OS01G0138900 | 459.08175  | 197.43334  | 1.2174   | 0.00312   |
| OS01G0139200 | 756.57327  | 1712.73589 | -1.1788  | 2.48E-09  |
| OS01G0140500 | 736.08478  | 1067.56305 | -0.53638 | 0.01968   |
| OS01G0140700 | 0          | 13.40054   |          | 0.00157   |
| OS01G0141000 | 31.58427   | 1140.54186 | -5.1744  | 2.60E-102 |
| OS01G0142300 | 2195.47398 | 1240.57322 | 0.82353  | 0.0483    |
| OS01G0143800 | 24.35926   | 93.35654   | -1.9383  | 6.40E-08  |
| OS01G0143900 | 5.74395    | 49.39551   | -3.1043  | 5.96E-09  |
| OS01G0145200 | 13.30482   | 44.29519   | -1.7352  | 0.00069   |
| OS01G0145600 | 52.00011   | 111.30623  | -1.0979  | 0.00117   |
| OS01G0148500 | 66.99292   | 175.56011  | -1.3899  | 8.69E-05  |
| OS01G0149600 | 65.57444   | 110.80133  | -0.75677 | 0.04026   |
| OS01G0149800 | 4818.91236 | 2818.65805 | 0.7737   | 0.00032   |
| OS01G0150200 | 234.77704  | 481.57773  | -1.0365  | 3.11E-06  |
| OS01G0151400 | 36.208     | 91.83626   | -1.3428  | 0.00017   |
| OS01G0152300 | 219.1966   | 430.21768  | -0.97284 | 2.68E-05  |
| OS01G0155400 | 374.34176  | 254.23619  | 0.55819  | 0.03643   |
| OS01G0155500 | 1673.06039 | 960.57074  | 0.80053  | 0.04099   |
| OS01G0158200 | 511.4274   | 333.31246  | 0.61765  | 0.0125    |

---

---

|              |            |            |          |          |
|--------------|------------|------------|----------|----------|
| OS01G0158600 | 2.7354     | 48.34739   | -4.1436  | 2.75E-10 |
| OS01G0159300 | 910.45474  | 640.57898  | 0.50721  | 0.03487  |
| OS01G0165000 | 80.17106   | 153.18642  | -0.93413 | 0.00213  |
| OS01G0166100 | 613.78218  | 414.2804   | 0.56712  | 0.02009  |
| OS01G0168100 | 1406.61103 | 500.33875  | 1.4912   | 1.97E-14 |
| OS01G0169800 | 41.59108   | 123.21789  | -1.5669  | 0.0099   |
| OS01G0169851 | 16.59409   | 60.96664   | -1.8774  | 0.02278  |
| OS01G0171800 | 1724.10488 | 799.85151  | 1.108    | 1.53E-08 |
| OS01G0172100 | 972.73706  | 671.39487  | 0.53489  | 0.02246  |
| OS01G0172400 | 3402.97977 | 2422.72374 | 0.49017  | 0.02982  |
| OS01G0172800 | 582.32061  | 235.43035  | 1.3065   | 1.02E-09 |
| OS01G0175100 | 405.73824  | 941.37859  | -1.2142  | 0.00824  |
| OS01G0175500 | 43.14737   | 97.86794   | -1.1816  | 0.00238  |
| OS01G0175700 | 372.21156  | 172.58675  | 1.1088   | 0.00144  |
| OS01G0176100 | 36.11782   | 68.94077   | -0.93265 | 0.02688  |
| OS01G0178000 | 995.42737  | 583.8754   | 0.76966  | 0.00889  |
| OS01G0178900 | 55.66044   | 171.88695  | -1.6267  | 4.85E-06 |
| OS01G0179000 | 7.25761    | 26.01192   | -1.8416  | 0.00847  |
| OS01G0179800 | 8882.14638 | 5056.48877 | 0.81277  | 0.00599  |
| OS01G0180300 | 366.84416  | 89.36781   | 2.0373   | 1.99E-09 |
| OS01G0182500 | 37.10767   | 73.8325    | -0.99254 | 0.01864  |
| OS01G0183100 | 27.13347   | 74.23563   | -1.452   | 0.00015  |
| OS01G0183300 | 122.62424  | 18.74348   | 2.7098   | 6.85E-15 |
| OS01G0183950 | 1.96352    | 11.63532   | -2.567   | 0.03312  |
| OS01G0184200 | 261.4359   | 428.01598  | -0.71121 | 0.0027   |
| OS01G0184500 | 72.25942   | 142.7493   | -0.98223 | 0.00171  |
| OS01G0185200 | 492.30836  | 733.06646  | -0.57438 | 0.01273  |

---

---

|              |            |            |          |          |
|--------------|------------|------------|----------|----------|
| OS01G0185900 | 5.05104    | 116.81835  | -4.5315  | 5.05E-18 |
| OS01G0186600 | 7.41177    | 162.2745   | -4.4525  | 5.65E-13 |
| OS01G0187500 | 902.68407  | 382.69741  | 1.238    | 2.60E-08 |
| OS01G0187900 | 38.23044   | 78.7612    | -1.0428  | 0.00785  |
| OS01G0188200 | 384.1898   | 193.85444  | 0.98685  | 0.009    |
| OS01G0188400 | 1210.46615 | 457.95344  | 1.4023   | 1.35E-12 |
| OS01G0190000 | 558.71291  | 1157.21985 | -1.0505  | 0.00445  |
| OS01G0191100 | 63.53944   | 120.22966  | -0.92007 | 0.0046   |
| OS01G0191200 | 340.81318  | 112.76045  | 1.5957   | 0.0021   |
| OS01G0191300 | 313.92208  | 182.88648  | 0.77946  | 0.00256  |
| OS01G0191900 | 189.34791  | 106.86738  | 0.82522  | 0.00301  |
| OS01G0192300 | 1015.79864 | 634.9189   | 0.67797  | 0.0017   |
| OS01G0192900 | 0          | 1094.48403 |          | 1.71E-11 |
| OS01G0194000 | 274.65533  | 179.54241  | 0.6133   | 0.02193  |
| OS01G0194300 | 387.68424  | 596.80429  | -0.62238 | 0.00746  |
| OS01G0194600 | 319.04087  | 182.33589  | 0.80714  | 0.00109  |
| OS01G0195000 | 230.58305  | 346.61182  | -0.58803 | 0.03015  |
| OS01G0197900 | 18.28573   | 40.65534   | -1.1527  | 0.02738  |
| OS01G0198000 | 76.01115   | 34.57321   | 1.1366   | 0.00312  |
| OS01G0198900 | 13838.1754 | 5791.10038 | 1.2567   | 3.01E-07 |
| OS01G0199400 | 2114.1956  | 813.76789  | 1.3774   | 0.0001   |
| OS01G0199550 | 19.12775   | 5.38512    | 1.8286   | 0.02019  |
| OS01G0199700 | 225.99183  | 123.53946  | 0.8713   | 0.00077  |
| OS01G0199900 | 40.46839   | 104.79708  | -1.3727  | 4.60E-05 |
| OS01G0200200 | 21.48232   | 0.24957    | 6.4275   | 0.00189  |
| OS01G0200350 | 87.22335   | 37.28397   | 1.2262   | 0.04263  |
| OS01G0200500 | 40.93702   | 103.71412  | -1.3411  | 5.84E-05 |

---

---

|              |             |             |          |          |
|--------------|-------------|-------------|----------|----------|
| OS01G0200700 | 54192.65029 | 32827.43977 | 0.72319  | 0.00856  |
| OS01G0201100 | 132.63092   | 257.44099   | -0.95682 | 0.0003   |
| OS01G0202500 | 1.24428     | 16.31776    | -3.7131  | 0.0004   |
| OS01G0202700 | 13.58304    | 2.86354     | 2.2459   | 0.02547  |
| OS01G0203400 | 55.5211     | 331.15216   | -2.5764  | 7.91E-25 |
| OS01G0206200 | 41.16508    | 88.63114    | -1.1064  | 0.00244  |
| OS01G0207400 | 930.30811   | 383.13357   | 1.2799   | 0.00125  |
| OS01G0208700 | 3407.15615  | 2268.40458  | 0.58689  | 0.00487  |
| OS01G0210500 | 934.0006    | 634.27512   | 0.55831  | 0.01559  |
| OS01G0213400 | 5.4733      | 37.0814     | -2.7602  | 0.0008   |
| OS01G0214200 | 75.84078    | 197.9536    | -1.3841  | 0.03381  |
| OS01G0217500 | 165.17931   | 68.11904    | 1.2779   | 0.00064  |
| OS01G0218500 | 58.76791    | 192.73508   | -1.7135  | 1.01E-09 |
| OS01G0218700 | 1305.97271  | 807.76933   | 0.69311  | 0.00131  |
| OS01G0219000 | 33.05157    | 87.12962    | -1.3984  | 0.00019  |
| OS01G0219300 | 122.68457   | 75.15392    | 0.70703  | 0.03278  |
| OS01G0220700 | 436.82308   | 147.1886    | 1.5694   | 4.20E-10 |
| OS01G0221000 | 57.91448    | 111.75146   | -0.9483  | 0.0057   |
| OS01G0221100 | 110.46596   | 237.57995   | -1.1048  | 0.00024  |
| OS01G0223900 | 0.74556     | 12.25255    | -4.0386  | 0.01655  |
| OS01G0225000 | 611.4689    | 118.81349   | 2.3636   | 0.00834  |
| OS01G0225400 | 24.76391    | 63.45025    | -1.3574  | 0.01194  |
| OS01G0226600 | 1753.45486  | 821.2993    | 1.0942   | 6.26E-05 |
| OS01G0227100 | 728.65652   | 450.29582   | 0.69437  | 0.00174  |
| OS01G0227300 | 760.47995   | 434.72351   | 0.80681  | 0.0002   |
| OS01G0227350 | 1096.55257  | 462.32779   | 1.246    | 2.61E-10 |
| OS01G0227400 | 123.82984   | 62.94448    | 0.97621  | 0.00196  |

---

---

|              |             |            |          |          |
|--------------|-------------|------------|----------|----------|
| OS01G0227500 | 1098.78593  | 379.36154  | 1.5343   | 3.37E-09 |
| OS01G0227700 | 45.79497    | 321.25986  | -2.8105  | 5.14E-18 |
| OS01G0227800 | 750.98421   | 162.11591  | 2.2118   | 8.65E-27 |
| OS01G0228600 | 2455.10927  | 1634.91148 | 0.58657  | 0.0044   |
| OS01G0229400 | 49.73211    | 15.47318   | 1.6844   | 0.00372  |
| OS01G0229500 | 188.47817   | 118.84164  | 0.66536  | 0.02622  |
| OS01G0229600 | 469.52622   | 82.25064   | 2.5131   | 6.69E-24 |
| OS01G0229700 | 11.32382    | 1.71556    | 2.7226   | 0.02006  |
| OS01G0232000 | 139.24585   | 44.08866   | 1.6592   | 0.00522  |
| OS01G0232300 | 142.41522   | 238.39938  | -0.74328 | 0.00568  |
| OS01G0233000 | 677.52914   | 995.28988  | -0.55483 | 0.01678  |
| OS01G0235100 | 3391.8643   | 1964.48392 | 0.78793  | 0.00128  |
| OS01G0235350 | 709.57602   | 364.13438  | 0.96249  | 0.00065  |
| OS01G0235400 | 90.90725    | 157.98095  | -0.79728 | 0.00847  |
| OS01G0236300 | 895.98362   | 611.99148  | 0.54996  | 0.01814  |
| OS01G0236700 | 7435.62327  | 2489.66856 | 1.5785   | 6.09E-18 |
| OS01G0236800 | 418.12553   | 287.20801  | 0.54184  | 0.03198  |
| OS01G0238500 | 8412.42264  | 1520.46488 | 2.468    | 0.01696  |
| OS01G0239000 | 12952.53721 | 5749.80408 | 1.1717   | 0.00031  |
| OS01G0239200 | 818.79576   | 366.6298   | 1.1592   | 0.01336  |
| OS01G0239700 | 895.59861   | 2293.30778 | -1.3565  | 1.27E-12 |
| OS01G0241000 | 276.57494   | 88.89333   | 1.6375   | 1.64E-07 |
| OS01G0241400 | 7.80898     | 0.60265    | 3.6957   | 0.02273  |
| OS01G0242600 | 248.64436   | 164.32693  | 0.59751  | 0.03639  |
| OS01G0243450 | 140.60671   | 89.5052    | 0.65162  | 0.04752  |
| OS01G0250600 | 63.51184    | 109.03823  | -0.77974 | 0.02787  |
| OS01G0251100 | 19.67911    | 57.7662    | -1.5536  | 0.00049  |

---

---

|              |            |            |          |          |
|--------------|------------|------------|----------|----------|
| OS01G0253500 | 5.24651    | 49.42287   | -3.2358  | 9.08E-08 |
| OS01G0254000 | 505.06525  | 344.13041  | 0.55351  | 0.02669  |
| OS01G0255000 | 744.12916  | 429.78319  | 0.79194  | 0.00022  |
| OS01G0256300 | 15.12552   | 4.02264    | 1.9108   | 0.03307  |
| OS01G0257300 | 7.11101    | 0.29577    | 4.5875   | 0.01407  |
| OS01G0259900 | 69.14935   | 115.69252  | -0.74251 | 0.04075  |
| OS01G0259933 | 2.31186    | 18.69555   | -3.0156  | 0.019    |
| OS01G0260700 | 227.55823  | 358.8779   | -0.65726 | 0.00915  |
| OS01G0262500 | 798.43501  | 366.72549  | 1.1225   | 0.03789  |
| OS01G0264000 | 1114.15246 | 803.39989  | 0.47176  | 0.04734  |
| OS01G0266000 | 126.51875  | 214.09009  | -0.75887 | 0.00822  |
| OS01G0266500 | 317.64217  | 87.42813   | 1.8612   | 1.45E-13 |
| OS01G0266600 | 311.53482  | 173.90559  | 0.84109  | 0.00074  |
| OS01G0266800 | 3899.15036 | 1689.71847 | 1.2064   | 1.30E-05 |
| OS01G0267300 | 23.36046   | 82.56171   | -1.8214  | 1.73E-05 |
| OS01G0268300 | 90.87575   | 144.73358  | -0.67143 | 0.04073  |
| OS01G0268600 | 26.6735    | 244.37566  | -3.1956  | 1.24E-21 |
| OS01G0268900 | 18.75813   | 54.68817   | -1.5437  | 0.00064  |
| OS01G0270100 | 739.07697  | 441.42469  | 0.74356  | 0.00074  |
| OS01G0271000 | 27.04957   | 66.921     | -1.3069  | 0.00138  |
| OS01G0274100 | 106.11802  | 35.25209   | 1.5899   | 1.10E-06 |
| OS01G0274800 | 27.93162   | 265.43321  | -3.2484  | 0.00063  |
| OS01G0275300 | 90.83712   | 176.09341  | -0.95499 | 0.00079  |
| OS01G0275800 | 155.18629  | 77.95563   | 0.99328  | 0.03694  |
| OS01G0276100 | 589.17824  | 882.07866  | -0.5822  | 0.01309  |
| OS01G0276700 | 217.25431  | 140.2248   | 0.63164  | 0.0263   |
| OS01G0276900 | 129.17883  | 57.73553   | 1.1618   | 0.02996  |

---

---

|              |             |            |          |          |
|--------------|-------------|------------|----------|----------|
| OS01G0279300 | 437.88838   | 659.97413  | -0.59185 | 0.01011  |
| OS01G0281000 | 3899.79365  | 2615.05252 | 0.57656  | 0.00641  |
| OS01G0281100 | 4744.40543  | 3067.73003 | 0.62906  | 0.00241  |
| OS01G0283300 | 3388.03327  | 2132.13629 | 0.66815  | 0.00291  |
| OS01G0283700 | 63.02572    | 17.83758   | 1.821    | 1.23E-05 |
| OS01G0284900 | 378.0895    | 184.51376  | 1.035    | 0.00072  |
| OS01G0289600 | 290.84508   | 482.69907  | -0.73087 | 0.04189  |
| OS01G0290000 | 723.03335   | 452.90112  | 0.67487  | 0.00252  |
| OS01G0292200 | 1786.87512  | 1005.6707  | 0.82928  | 3.87E-05 |
| OS01G0292900 | 997.57175   | 1563.40232 | -0.6482  | 0.00225  |
| OS01G0297200 | 7.45936     | 32.65081   | -2.13    | 0.00068  |
| OS01G0301000 | 10.97169    | 36.27017   | -1.725   | 0.00223  |
| OS01G0301700 | 3.95336     | 17.20159   | -2.1214  | 0.01716  |
| OS01G0301900 | 372.62343   | 60.79859   | 2.6156   | 6.02E-28 |
| OS01G0302000 | 225.59841   | 39.18778   | 2.5253   | 6.98E-15 |
| OS01G0303800 | 53.41596    | 515.85048  | -3.2716  | 1.91E-05 |
| OS01G0305900 | 539.03351   | 152.44082  | 1.8221   | 9.52E-09 |
| OS01G0307686 | 53.52629    | 8.63493    | 2.632    | 0.04684  |
| OS01G0309800 | 2459.48382  | 4303.23641 | -0.80707 | 5.58E-05 |
| OS01G0310500 | 322.78091   | 486.26093  | -0.59118 | 0.01997  |
| OS01G0310600 | 124.4111    | 190.64919  | -0.61581 | 0.04238  |
| OS01G0314800 | 15949.76282 | 4103.07562 | 1.9588   | 6.69E-11 |
| OS01G0316600 | 1370.31044  | 691.78382  | 0.98611  | 1.05E-06 |
| OS01G0316900 | 1074.91106  | 732.64024  | 0.55304  | 0.01358  |
| OS01G0317800 | 266.7637    | 154.96471  | 0.78362  | 0.00296  |
| OS01G0318202 | 5.24523     | 57.53256   | -3.4553  | 0.00013  |
| OS01G0318600 | 333.79656   | 209.66534  | 0.67088  | 0.00715  |

---



---

|              |             |            |          |          |
|--------------|-------------|------------|----------|----------|
| OS01G0321300 | 1707.57124  | 1215.64372 | 0.49023  | 0.03418  |
| OS01G0321900 | 6.71886     | 24.52583   | -1.868   | 0.00667  |
| OS01G0326100 | 2.5888      | 37.5807    | -3.8596  | 1.38E-08 |
| OS01G0326300 | 72.79082    | 1841.61489 | -4.6611  | 3.00E-37 |
| OS01G0327400 | 499.7449    | 732.38165  | -0.5514  | 0.02388  |
| OS01G0328600 | 1506.55018  | 973.46915  | 0.63004  | 0.00371  |
| OS01G0329400 | 1363.26829  | 738.68426  | 0.88404  | 1.23E-05 |
| OS01G0332100 | 3316.19997  | 588.70035  | 2.4939   | 1.67E-06 |
| OS01G0332150 | 21.86314    | 4.16871    | 2.3908   | 0.00145  |
| OS01G0332800 | 749.25876   | 488.68312  | 0.61656  | 0.0091   |
| OS01G0337500 | 0.39721     | 39.48679   | -6.6353  | 4.20E-13 |
| OS01G0337900 | 134.22762   | 204.42739  | -0.60691 | 0.04639  |
| OS01G0339500 | 172.75496   | 97.39725   | 0.82677  | 0.00407  |
| OS01G0341200 | 16.40733    | 36.93935   | -1.1708  | 0.04572  |
| OS01G0341750 | 142.00153   | 55.97551   | 1.343    | 0.00492  |
| OS01G0346700 | 1473.72731  | 959.64343  | 0.6189   | 0.00399  |
| OS01G0350900 | 1878.26692  | 1217.08456 | 0.62597  | 0.00295  |
| OS01G0351800 | 2.75794     | 17.31258   | -2.6502  | 0.00378  |
| OS01G0356400 | 17436.96476 | 9763.12037 | 0.83673  | 0.00242  |
| OS01G0356951 | 21.28422    | 0.89841    | 4.5663   | 4.16E-05 |
| OS01G0358100 | 18.35714    | 48.58964   | -1.4043  | 0.00304  |
| OS01G0358300 | 410.5265    | 269.08434  | 0.60942  | 0.01523  |
| OS01G0359400 | 161.64295   | 490.70086  | -1.602   | 4.05E-11 |
| OS01G0360200 | 64.92662    | 32.40699   | 1.0025   | 0.01712  |
| OS01G0361500 | 2414.58444  | 1259.38048 | 0.93906  | 1.83E-06 |
| OS01G0362100 | 3291.48347  | 1858.37557 | 0.8247   | 5.33E-05 |
| OS01G0363300 | 1267.64943  | 579.16604  | 1.1301   | 6.73E-09 |

---

---

|              |            |            |          |          |
|--------------|------------|------------|----------|----------|
| OS01G0364800 | 68.85863   | 309.04362  | -2.1661  | 6.31E-19 |
| OS01G0365000 | 13.3086    | 134.99859  | -3.3425  | 4.04E-21 |
| OS01G0366100 | 40.0086    | 72.25379   | -0.85276 | 0.03686  |
| OS01G0368700 | 75.97728   | 34.00423   | 1.1599   | 0.00768  |
| OS01G0369900 | 11.51045   | 46.26032   | -2.0068  | 6.30E-05 |
| OS01G0372100 | 30.31745   | 5.83807    | 2.3766   | 0.00015  |
| OS01G0375000 | 51.75455   | 138.44988  | -1.4196  | 2.42E-06 |
| OS01G0375200 | 44.47312   | 21.72527   | 1.0336   | 0.03862  |
| OS01G0377000 | 19.06139   | 3.70465    | 2.3632   | 0.00373  |
| OS01G0383700 | 3485.13971 | 1762.23464 | 0.98381  | 0.01341  |
| OS01G0384300 | 255.80071  | 171.99768  | 0.57263  | 0.04967  |
| OS01G0385400 | 14.50274   | 1.41979    | 3.3526   | 0.02998  |
| OS01G0389700 | 10.10458   | 33.73021   | -1.739   | 0.00396  |
| OS01G0390300 | 279.19504  | 134.59064  | 1.0527   | 1.90E-05 |
| OS01G0390400 | 894.2732   | 501.93298  | 0.83322  | 7.71E-05 |
| OS01G0390900 | 576.86869  | 403.17039  | 0.51685  | 0.04002  |
| OS01G0495701 | 1.96352    | 112.27996  | -5.8375  | 1.35E-05 |
| OS01G0498200 | 1796.35907 | 1011.85003 | 0.82808  | 0.0017   |
| OS01G0500600 | 74.65152   | 131.30702  | -0.8147  | 0.01132  |
| OS01G0501700 | 772.54936  | 519.59824  | 0.57223  | 0.01215  |
| OS01G0504500 | 567.24005  | 244.9606   | 1.2114   | 0.04596  |
| OS01G0507700 | 4762.59334 | 2799.31174 | 0.76668  | 0.005    |
| OS01G0508000 | 84.07938   | 27.87023   | 1.593    | 0.00325  |
| OS01G0508100 | 7.44187    | 0.29577    | 4.6531   | 0.01312  |
| OS01G0508500 | 527.82526  | 42.78333   | 3.6249   | 3.96E-09 |
| OS01G0515300 | 132.90684  | 43.62633   | 1.6071   | 3.72E-06 |
| OS01G0521400 | 822.25048  | 464.78519  | 0.82301  | 0.00014  |

---

---

|              |             |             |          |          |
|--------------|-------------|-------------|----------|----------|
| OS01G0528800 | 880.59283   | 496.3406    | 0.82714  | 0.01448  |
| OS01G0531500 | 677.24141   | 283.7176    | 1.2552   | 1.79E-09 |
| OS01G0532600 | 188.61356   | 87.48007    | 1.1084   | 6.43E-05 |
| OS01G0536000 | 1223.24944  | 665.39866   | 0.87843  | 1.93E-05 |
| OS01G0542700 | 1550.56499  | 1025.05122  | 0.5971   | 0.04315  |
| OS01G0546400 | 387.84018   | 87.69086    | 2.145    | 9.78E-21 |
| OS01G0546800 | 193.67946   | 300.70101   | -0.63466 | 0.0186   |
| OS01G0547600 | 2707.47467  | 1338.37836  | 1.0165   | 0.03035  |
| OS01G0551000 | 1589.5218   | 632.89485   | 1.3286   | 2.82E-07 |
| OS01G0552300 | 1796.49232  | 1273.11453  | 0.49682  | 0.02828  |
| OS01G0556650 | 22177.84051 | 10832.17321 | 1.0338   | 3.83E-05 |
| OS01G0556700 | 660.71671   | 415.31786   | 0.66982  | 0.00352  |
| OS01G0559600 | 2113.72004  | 6027.91879  | -1.5119  | 6.57E-10 |
| OS01G0560000 | 444.02605   | 660.56011   | -0.57305 | 0.01757  |
| OS01G0561600 | 47.18708    | 9.67208     | 2.2865   | 0.00982  |
| OS01G0562600 | 21.55611    | 73.61801    | -1.772   | 9.11E-06 |
| OS01G0564300 | 267.87519   | 1714.79879  | -2.6784  | 2.35E-42 |
| OS01G0566100 | 31.97643    | 73.5216     | -1.2012  | 0.00352  |
| OS01G0566500 | 6.66999     | 0           |          | 0.00747  |
| OS01G0571000 | 282.48538   | 108.55453   | 1.3798   | 1.23E-08 |
| OS01G0574800 | 850.91069   | 465.52714   | 0.87014  | 3.79E-05 |
| OS01G0575901 | 0.34835     | 34.63226    | -6.6355  | 1.70E-11 |
| OS01G0578000 | 72.52014    | 124.5554    | -0.78033 | 0.01808  |
| OS01G0579800 | 10.76867    | 31.69493    | -1.5574  | 0.01022  |
| OS01G0580800 | 1443.26308  | 743.55066   | 0.95683  | 1.51E-06 |
| OS01G0582600 | 1502.12155  | 793.95696   | 0.91987  | 0.00049  |
| OS01G0583100 | 2587.8176   | 614.91127   | 2.0733   | 1.10E-28 |

---

---

|              |             |            |          |          |
|--------------|-------------|------------|----------|----------|
| OS01G0583200 | 26.86659    | 58.93051   | -1.1332  | 0.01051  |
| OS01G0584032 | 10.394      | 1.70444    | 2.6084   | 0.03304  |
| OS01G0584900 | 76.8857     | 40.04687   | 0.94103  | 0.01475  |
| OS01G0585100 | 416.97626   | 116.89568  | 1.8347   | 8.58E-14 |
| OS01G0585200 | 0.79442     | 10.11951   | -3.6711  | 0.0104   |
| OS01G0585300 | 7934.43473  | 4601.14182 | 0.78614  | 0.00538  |
| OS01G0585600 | 115.25386   | 69.36266   | 0.73258  | 0.03079  |
| OS01G0587300 | 75.471      | 42.80154   | 0.81826  | 0.03963  |
| OS01G0587400 | 33.9112     | 66.11844   | -0.96329 | 0.0315   |
| OS01G0588900 | 10157.17445 | 5025.05871 | 1.0153   | 0.00011  |
| OS01G0589800 | 896.84071   | 583.24899  | 0.62074  | 0.01692  |
| OS01G0591000 | 1475.01549  | 597.49942  | 1.3037   | 0.00074  |
| OS01G0601000 | 65.25492    | 26.26566   | 1.3129   | 0.00552  |
| OS01G0601625 | 56.84197    | 164.35552  | -1.5318  | 9.25E-08 |
| OS01G0603000 | 257.47961   | 386.3688   | -0.58552 | 0.02155  |
| OS01G0603100 | 41.74022    | 7.57949    | 2.4613   | 1.59E-06 |
| OS01G0603300 | 2932.56097  | 1060.9169  | 1.4668   | 3.93E-05 |
| OS01G0603800 | 37.79685    | 14.51573   | 1.3806   | 0.02105  |
| OS01G0605700 | 255.11139   | 47.89334   | 2.4132   | 6.98E-10 |
| OS01G0606000 | 25.35038    | 2.28312    | 3.4729   | 5.75E-05 |
| OS01G0606400 | 30.14202    | 8.2247     | 1.8737   | 0.00237  |
| OS01G0607900 | 131.33306   | 70.49865   | 0.89756  | 0.01511  |
| OS01G0609200 | 11.22231    | 0.74872    | 3.9058   | 0.00348  |
| OS01G0609300 | 789.44545   | 348.55564  | 1.1795   | 2.40E-05 |
| OS01G0609501 | 57.45707    | 17.43083   | 1.7208   | 0.01336  |
| OS01G0609900 | 64.32884    | 125.49663  | -0.96411 | 0.04669  |
| OS01G0610400 | 26.91418    | 53.94852   | -1.0032  | 0.0354   |

---

---

|              |            |            |          |          |
|--------------|------------|------------|----------|----------|
| OS01G0610600 | 216.75971  | 324.02068  | -0.57999 | 0.02975  |
| OS01G0612700 | 25.76763   | 51.69321   | -1.0044  | 0.03577  |
| OS01G0612900 | 673.42245  | 361.37667  | 0.89801  | 3.32E-05 |
| OS01G0616500 | 60.59991   | 118.51781  | -0.96772 | 0.00219  |
| OS01G0617600 | 10.61451   | 38.2334    | -1.8488  | 0.00098  |
| OS01G0618200 | 29.7322    | 59.26711   | -0.99521 | 0.02845  |
| OS01G0618700 | 20.64518   | 49.941     | -1.2744  | 0.00802  |
| OS01G0621300 | 1213.54443 | 781.20311  | 0.63546  | 0.00318  |
| OS01G0621900 | 2021.28902 | 1228.8792  | 0.71793  | 0.00137  |
| OS01G0622700 | 2853.47436 | 1861.09908 | 0.61656  | 0.00373  |
| OS01G0623500 | 934.13725  | 472.67954  | 0.98277  | 0.02208  |
| OS01G0624700 | 3.40955    | 18.79141   | -2.4624  | 0.00497  |
| OS01G0626400 | 52.95875   | 23.21333   | 1.1899   | 0.0077   |
| OS01G0626500 | 65.48291   | 113.08854  | -0.78826 | 0.02157  |
| OS01G0627400 | 107.19681  | 47.48241   | 1.1748   | 0.00031  |
| OS01G0629400 | 2165.66208 | 1298.89939 | 0.73752  | 0.00038  |
| OS01G0629600 | 26.1699    | 79.50803   | -1.6032  | 2.08E-05 |
| OS01G0629750 | 418.19771  | 294.29105  | 0.50694  | 0.04659  |
| OS01G0629900 | 241.66601  | 143.29322  | 0.75404  | 0.00478  |
| OS01G0638600 | 397.48226  | 208.45056  | 0.93119  | 0.00847  |
| OS01G0639200 | 748.71832  | 315.91193  | 1.2449   | 0.00189  |
| OS01G0641000 | 577.96524  | 309.11205  | 0.90285  | 4.20E-05 |
| OS01G0642000 | 387.26927  | 138.21479  | 1.4864   | 1.55E-06 |
| OS01G0642100 | 115.51463  | 44.86141   | 1.3645   | 3.61E-05 |
| OS01G0642801 | 2.33819    | 12.19714   | -2.3831  | 0.04819  |
| OS01G0642900 | 28.14475   | 61.96085   | -1.1385  | 0.00674  |
| OS01G0645200 | 5523.50785 | 3412.8202  | 0.69462  | 0.00057  |

---

---

|              |            |            |          |          |
|--------------|------------|------------|----------|----------|
| OS01G0645900 | 39.67512   | 104.70682  | -1.4     | 2.40E-05 |
| OS01G0647000 | 1136.64882 | 711.39485  | 0.67606  | 0.02957  |
| OS01G0648600 | 27.12336   | 77.29522   | -1.5108  | 0.00011  |
| OS01G0649000 | 39.62005   | 77.10839   | -0.96066 | 0.01549  |
| OS01G0649200 | 106.58665  | 178.33806  | -0.74259 | 0.01264  |
| OS01G0650000 | 11.83753   | 57.1191    | -2.2706  | 6.67E-07 |
| OS01G0650100 | 6.19381    | 25.15433   | -2.0219  | 0.00404  |
| OS01G0650200 | 272.36581  | 736.0256   | -1.4342  | 4.15E-12 |
| OS01G0650800 | 115.57975  | 186.51926  | -0.69044 | 0.01855  |
| OS01G0654100 | 21.14641   | 5.07824    | 2.058    | 0.00998  |
| OS01G0656400 | 275.00473  | 68.25022   | 2.0106   | 2.83E-11 |
| OS01G0660200 | 687.84555  | 2124.75198 | -1.6271  | 0.00088  |
| OS01G0660300 | 258.62366  | 134.09111  | 0.94764  | 0.00025  |
| OS01G0661400 | 17.84093   | 40.59803   | -1.1862  | 0.01907  |
| OS01G0662600 | 8188.09374 | 4876.95077 | 0.74755  | 0.00013  |
| OS01G0662700 | 298.3101   | 184.90239  | 0.69005  | 0.00772  |
| OS01G0663400 | 287.42855  | 141.01616  | 1.0273   | 0.00039  |
| OS01G0663500 | 141.01904  | 212.18732  | -0.58945 | 0.0494   |
| OS01G0664500 | 465.9063   | 274.63981  | 0.7625   | 0.00106  |
| OS01G0665400 | 65.43787   | 105.459    | -0.68848 | 0.04802  |
| OS01G0665500 | 96.44326   | 159.87742  | -0.72921 | 0.02104  |
| OS01G0665750 | 52.1355    | 103.34395  | -0.98712 | 0.00491  |
| OS01G0666400 | 77.91324   | 42.76843   | 0.86532  | 0.03758  |
| OS01G0666600 | 4244.43694 | 2637.3746  | 0.68647  | 0.00059  |
| OS01G0667900 | 756.35446  | 137.70125  | 2.4575   | 1.07E-31 |
| OS01G0668000 | 436.82058  | 214.24741  | 1.0278   | 7.37E-06 |
| OS01G0668600 | 13.38507   | 42.80312   | -1.6771  | 0.00097  |

---

---

|              |            |            |          |          |
|--------------|------------|------------|----------|----------|
| OS01G0668901 | 16.87736   | 42.51311   | -1.3328  | 0.00847  |
| OS01G0669100 | 86.47254   | 306.27309  | -1.8245  | 1.92E-12 |
| OS01G0670100 | 0.69669    | 59.03212   | -6.4048  | 1.60E-18 |
| OS01G0670500 | 15.1856    | 45.85507   | -1.5944  | 0.01021  |
| OS01G0674700 | 15.84225   | 64.25084   | -2.0199  | 2.84E-06 |
| OS01G0674800 | 27.95421   | 233.71616  | -3.0636  | 3.09E-16 |
| OS01G0675100 | 2745.81263 | 1319.43388 | 1.0573   | 1.04E-07 |
| OS01G0677900 | 163.74046  | 443.60487  | -1.4379  | 1.27E-10 |
| OS01G0678000 | 51.21698   | 122.12235  | -1.2536  | 0.00015  |
| OS01G0678100 | 206.93452  | 102.33397  | 1.0159   | 0.00062  |
| OS01G0678500 | 586.93711  | 403.60586  | 0.54026  | 0.02993  |
| OS01G0681700 | 534.47534  | 839.45349  | -0.65133 | 0.01972  |
| OS01G0681900 | 68.90379   | 131.75322  | -0.93518 | 0.00659  |
| OS01G0682001 | 247.23599  | 536.29468  | -1.1171  | 0.00288  |
| OS01G0685100 | 71.65418   | 134.85599  | -0.9123  | 0.00397  |
| OS01G0686000 | 200.1803   | 94.88204   | 1.0771   | 6.81E-05 |
| OS01G0686800 | 587.15237  | 866.51858  | -0.5615  | 0.01474  |
| OS01G0687400 | 107.13136  | 372.84508  | -1.7992  | 0.00067  |
| OS01G0689451 | 1707.88516 | 1206.27307 | 0.50165  | 0.03076  |
| OS01G0689800 | 127.99755  | 208.94681  | -0.70702 | 0.01492  |
| OS01G0690200 | 391.14448  | 211.84249  | 0.88471  | 0.00021  |
| OS01G0690600 | 14.71082   | 59.38385   | -2.0132  | 5.33E-06 |
| OS01G0690800 | 185.19527  | 301.30986  | -0.7022  | 0.00529  |
| OS01G0693400 | 963.91272  | 328.72115  | 1.552    | 0.0126   |
| OS01G0695300 | 2776.25768 | 829.66951  | 1.7425   | 1.29E-20 |
| OS01G0695700 | 1060.3788  | 352.45993  | 1.589    | 0.03691  |
| OS01G0695800 | 190.34271  | 76.51158   | 1.3148   | 0.00012  |

---



---

|              |             |             |          |          |
|--------------|-------------|-------------|----------|----------|
| OS01G0697100 | 305.96122   | 122.14387   | 1.3248   | 1.89E-08 |
| OS01G0698000 | 146.53996   | 255.60461   | -0.80262 | 0.0108   |
| OS01G0699100 | 884.94455   | 244.72247   | 1.8544   | 1.47E-07 |
| OS01G0699400 | 65.38394    | 5.27051     | 3.6329   | 0.02684  |
| OS01G0700100 | 8009.56155  | 5822.46226  | 0.46009  | 0.04002  |
| OS01G0703400 | 2709.12769  | 1532.09372  | 0.82232  | 4.03E-05 |
| OS01G0704300 | 280.02533   | 645.86319   | -1.2057  | 5.37E-05 |
| OS01G0706900 | 439.48057   | 185.06249   | 1.2478   | 1.52E-07 |
| OS01G0708500 | 16.45998    | 65.9787     | -2.003   | 0.04687  |
| OS01G0709500 | 2611.03732  | 1655.37976  | 0.65746  | 0.00171  |
| OS01G0710200 | 317.41057   | 183.96346   | 0.78693  | 0.00406  |
| OS01G0710700 | 1343.60321  | 1915.59755  | -0.51169 | 0.02156  |
| OS01G0711000 | 72.86093    | 20.89339    | 1.8021   | 3.46E-06 |
| OS01G0711400 | 18580.81167 | 11035.18628 | 0.7517   | 0.00011  |
| OS01G0712700 | 1369.24822  | 297.37875   | 2.203    | 5.59E-30 |
| OS01G0715400 | 917.3335    | 387.21322   | 1.2443   | 1.12E-09 |
| OS01G0716800 | 67.46272    | 14.3252     | 2.2355   | 0.00406  |
| OS01G0717400 | 128.90368   | 40.12711    | 1.6836   | 0.03007  |
| OS01G0718000 | 39.095      | 77.5664     | -0.98845 | 0.04933  |
| OS01G0718300 | 602.32293   | 285.89086   | 1.0751   | 4.80E-07 |
| OS01G0718700 | 36.40091    | 16.31429    | 1.1578   | 0.04053  |
| OS01G0719100 | 245.46542   | 484.75795   | -0.98174 | 1.54E-05 |
| OS01G0719700 | 833.56175   | 568.43355   | 0.5523   | 0.02326  |
| OS01G0719800 | 1118.42661  | 701.39364   | 0.67317  | 0.00195  |
| OS01G0720400 | 6636.88416  | 2294.7454   | 1.5322   | 5.83E-07 |
| OS01G0720600 | 302.3687    | 158.05891   | 0.93585  | 0.00012  |
| OS01G0720700 | 1134.90204  | 525.63515   | 1.1104   | 1.92E-08 |

---

---

|              |            |            |          |          |
|--------------|------------|------------|----------|----------|
| OS01G0721900 | 332.80541  | 557.62336  | -0.74461 | 0.00109  |
| OS01G0723200 | 84.0154    | 160.15806  | -0.93077 | 0.0043   |
| OS01G0725800 | 9069.02027 | 5955.65644 | 0.60669  | 0.00296  |
| OS01G0727820 | 53.68292   | 138.93065  | -1.3718  | 5.53E-06 |
| OS01G0727840 | 5.39561    | 18.74159   | -1.7964  | 0.03104  |
| OS01G0729100 | 106.90366  | 208.05652  | -0.96066 | 0.00038  |
| OS01G0729500 | 11.31121   | 28.76486   | -1.3466  | 0.04455  |
| OS01G0730500 | 677.1151   | 279.77802  | 1.2751   | 1.69E-09 |
| OS01G0730700 | 8.08214    | 27.91264   | -1.7881  | 0.00653  |
| OS01G0730800 | 654.52136  | 423.45635  | 0.62823  | 0.00696  |
| OS01G0731100 | 307.50982  | 3404.26248 | -3.4686  | 6.72E-10 |
| OS01G0731201 | 29.30994   | 779.02563  | -4.7322  | 8.20E-33 |
| OS01G0733001 | 117.68732  | 223.31876  | -0.92415 | 0.00061  |
| OS01G0734600 | 2035.05666 | 1227.09416 | 0.72982  | 0.01029  |
| OS01G0737900 | 82.06835   | 133.71013  | -0.70421 | 0.03104  |
| OS01G0738000 | 31.36248   | 58.91577   | -0.90961 | 0.04798  |
| OS01G0739200 | 388.65104  | 226.86819  | 0.77662  | 0.00129  |
| OS01G0739500 | 387.4771   | 657.90029  | -0.76376 | 0.00154  |
| OS01G0740650 | 205.08012  | 93.3917    | 1.1348   | 0.00011  |
| OS01G0742100 | 22.11503   | 52.25188   | -1.2405  | 0.00806  |
| OS01G0742500 | 1997.32179 | 838.06444  | 1.2529   | 6.32E-11 |
| OS01G0745000 | 0          | 69.1991    |          | 4.23E-08 |
| OS01G0746200 | 111.29312  | 176.92379  | -0.66876 | 0.02977  |
| OS01G0746400 | 40.45463   | 6.09876    | 2.7297   | 1.63E-05 |
| OS01G0747300 | 110.1475   | 34.82263   | 1.6613   | 0.02019  |
| OS01G0747400 | 145.16904  | 90.29861   | 0.68496  | 0.03059  |
| OS01G0748200 | 51.55909   | 90.68306   | -0.81461 | 0.03389  |

---

---

|              |            |            |          |          |
|--------------|------------|------------|----------|----------|
| OS01G0750100 | 1282.94177 | 1835.54643 | -0.51675 | 0.02944  |
| OS01G0750900 | 92.87455   | 48.5064    | 0.93711  | 0.00937  |
| OS01G0753200 | 132.35165  | 201.29795  | -0.60496 | 0.04572  |
| OS01G0753500 | 447.32242  | 253.00851  | 0.82213  | 0.00045  |
| OS01G0754100 | 57.09246   | 120.62916  | -1.0792  | 0.0008   |
| OS01G0755500 | 1.94097    | 11.29509   | -2.5408  | 0.03928  |
| OS01G0756200 | 0.69669    | 9.1377     | -3.7132  | 0.02425  |
| OS01G0757600 | 92.08123   | 43.80748   | 1.0717   | 0.01     |
| OS01G0757900 | 77.79157   | 147.41068  | -0.92216 | 0.00226  |
| OS01G0763000 | 54.22185   | 100.24809  | -0.88663 | 0.0098   |
| OS01G0763600 | 136.86143  | 83.71946   | 0.70908  | 0.0345   |
| OS01G0764400 | 920.12187  | 435.91279  | 1.0778   | 2.20E-07 |
| OS01G0766300 | 38.35955   | 129.42548  | -1.7545  | 0.00137  |
| OS01G0767600 | 290.52906  | 186.67982  | 0.63812  | 0.02058  |
| OS01G0767900 | 1221.2888  | 778.23597  | 0.65012  | 0.00214  |
| OS01G0768700 | 20.4923    | 45.12897   | -1.139   | 0.02643  |
| OS01G0770100 | 194.08542  | 77.22182   | 1.3296   | 0.00612  |
| OS01G0770200 | 1018.66388 | 663.80266  | 0.61785  | 0.00566  |
| OS01G0773100 | 58.19269   | 100.28317  | -0.78517 | 0.02688  |
| OS01G0775500 | 320.1873   | 203.88503  | 0.65116  | 0.01351  |
| OS01G0778800 | 213.70959  | 318.04132  | -0.57356 | 0.03086  |
| OS01G0784450 | 1.94097    | 34.63052   | -4.1572  | 9.49E-09 |
| OS01G0784500 | 11.82126   | 50.20902   | -2.0866  | 0.00021  |
| OS01G0785700 | 25.43555   | 53.19058   | -1.0643  | 0.02234  |
| OS01G0786900 | 1924.72579 | 1153.2046  | 0.739    | 0.00038  |
| OS01G0787400 | 1118.24034 | 626.48038  | 0.83589  | 0.00193  |
| OS01G0787600 | 2.31186    | 85.19216   | -5.2036  | 8.16E-23 |

---

---

|              |            |            |          |          |
|--------------|------------|------------|----------|----------|
| OS01G0788500 | 71.86968   | 129.36563  | -0.848   | 0.00776  |
| OS01G0788950 | 52.18059   | 99.74114   | -0.93468 | 0.00794  |
| OS01G0789100 | 20.74669   | 51.90764   | -1.3231  | 0.00548  |
| OS01G0793200 | 30.51036   | 76.2028    | -1.3205  | 0.00087  |
| OS01G0793300 | 400.17124  | 6.37056    | 5.9731   | 9.69E-06 |
| OS01G0793900 | 15.81466   | 72.69184   | -2.2005  | 1.12E-07 |
| OS01G0794400 | 268.24849  | 148.83985  | 0.84981  | 0.00124  |
| OS01G0796000 | 17.58899   | 87.71593   | -2.3182  | 1.38E-07 |
| OS01G0796400 | 299.04352  | 558.73069  | -0.9018  | 4.76E-05 |
| OS01G0797900 | 309.41087  | 204.48729  | 0.59751  | 0.02938  |
| OS01G0798800 | 34.51148   | 79.08344   | -1.1963  | 0.01213  |
| OS01G0800300 | 407.40653  | 280.78589  | 0.537    | 0.03195  |
| OS01G0800500 | 2335.96741 | 721.94906  | 1.6941   | 2.64E-17 |
| OS01G0802100 | 256.21902  | 156.11229  | 0.71479  | 0.00926  |
| OS01G0805000 | 489.62886  | 325.82126  | 0.58761  | 0.01581  |
| OS01G0806300 | 5.46702    | 23.62718   | -2.1116  | 0.00515  |
| OS01G0807800 | 18.06144   | 38.18721   | -1.0802  | 0.04978  |
| OS01G0808100 | 411.43682  | 595.75726  | -0.53405 | 0.03448  |
| OS01G0810000 | 31.33616   | 88.132     | -1.4918  | 4.04E-05 |
| OS01G0810300 | 894.78714  | 344.50328  | 1.377    | 7.12E-12 |
| OS01G0813100 | 37.60894   | 14.82048   | 1.3435   | 0.01046  |
| OS01G0813700 | 17.75691   | 3.20377    | 2.4705   | 0.0033   |
| OS01G0813800 | 17.75691   | 269.88374  | -3.9259  | 1.90E-25 |
| OS01G0814000 | 74.80568   | 128.69638  | -0.78275 | 0.02004  |
| OS01G0817000 | 1230.92796 | 716.95354  | 0.77979  | 0.00056  |
| OS01G0819700 | 208.52655  | 338.41719  | -0.69857 | 0.01257  |
| OS01G0823600 | 4554.97544 | 2139.18347 | 1.0904   | 4.70E-08 |

---

---

|              |            |            |          |          |
|--------------|------------|------------|----------|----------|
| OS01G0823900 | 91.44864   | 301.89773  | -1.723   | 2.23E-12 |
| OS01G0824000 | 2.66021    | 15.58591   | -2.5506  | 0.0098   |
| OS01G0824600 | 423.29454  | 181.99231  | 1.2178   | 0.00054  |
| OS01G0824800 | 255.79184  | 410.63629  | -0.68289 | 0.00538  |
| OS01G0825500 | 4018.58217 | 2085.68365 | 0.94617  | 0.00311  |
| OS01G0825800 | 58.09208   | 695.05454  | -3.5807  | 6.91E-05 |
| OS01G0826900 | 4482.48167 | 1877.44907 | 1.2555   | 1.62E-11 |
| OS01G0827600 | 55.10012   | 112.87081  | -1.0345  | 0.004    |
| OS01G0827800 | 0          | 20.33141   |          | 1.43E-07 |
| OS01G0828100 | 1317.15105 | 583.04439  | 1.1757   | 2.56E-09 |
| OS01G0830000 | 4831.45421 | 2624.41149 | 0.88046  | 3.95E-06 |
| OS01G0830100 | 1564.6603  | 893.17449  | 0.80884  | 8.17E-05 |
| OS01G0830700 | 404.55581  | 1445.06137 | -1.8367  | 7.89E-15 |
| OS01G0830900 | 150.43436  | 42.18855   | 1.8342   | 1.59E-06 |
| OS01G0833150 | 1501.5079  | 779.79116  | 0.94525  | 1.58E-06 |
| OS01G0833200 | 2915.13446 | 1684.40494 | 0.79132  | 5.33E-05 |
| OS01G0834500 | 390.39286  | 587.93344  | -0.59073 | 0.01171  |
| OS01G0835800 | 75.298     | 33.02785   | 1.1889   | 0.00385  |
| OS01G0835900 | 216.37103  | 334.14892  | -0.62698 | 0.01632  |
| OS01G0836800 | 871.26273  | 1250.78658 | -0.52166 | 0.02303  |
| OS01G0837000 | 71.90097   | 238.48664  | -1.7298  | 5.27E-11 |
| OS01G0837800 | 7490.74349 | 4673.66353 | 0.68056  | 0.00063  |
| OS01G0838600 | 268.22073  | 92.63431   | 1.5338   | 1.33E-05 |
| OS01G0838800 | 98.71878   | 157.27306  | -0.67188 | 0.02812  |
| OS01G0839300 | 26.16234   | 60.05878   | -1.1989  | 0.0047   |
| OS01G0839500 | 120.91396  | 254.25914  | -1.0723  | 3.14E-05 |
| OS01G0840700 | 39.57989   | 91.58676   | -1.2104  | 0.00066  |

---

---

|              |            |            |          |          |
|--------------|------------|------------|----------|----------|
| OS01G0840900 | 130.06246  | 253.72549  | -0.96406 | 0.00204  |
| OS01G0841000 | 288.50405  | 752.7749   | -1.3836  | 4.73E-11 |
| OS01G0842200 | 9172.48903 | 3919.78879 | 1.2265   | 2.36E-11 |
| OS01G0842600 | 69.28967   | 23.8773    | 1.537    | 0.0001   |
| OS01G0844800 | 187.81413  | 282.08096  | -0.5868  | 0.03037  |
| OS01G0845950 | 2.80681    | 25.60342   | -3.1893  | 2.93E-05 |
| OS01G0846300 | 1874.05483 | 575.00943  | 1.7045   | 1.60E-19 |
| OS01G0846400 | 249.97974  | 53.41152   | 2.2266   | 0.00633  |
| OS01G0846450 | 628.38837  | 260.33013  | 1.2713   | 4.08E-06 |
| OS01G0846700 | 1149.8424  | 751.79216  | 0.61303  | 0.01101  |
| OS01G0847100 | 36.75054   | 108.55541  | -1.5626  | 3.00E-06 |
| OS01G0847200 | 358.60795  | 159.90248  | 1.1652   | 7.01E-07 |
| OS01G0850900 | 3368.51453 | 1896.39917 | 0.82885  | 0.00258  |
| OS01G0851100 | 636.48582  | 282.42897  | 1.1722   | 3.49E-08 |
| OS01G0851600 | 58.0185    | 30.35098   | 0.93477  | 0.0332   |
| OS01G0852100 | 43.68613   | 160.34124  | -1.8759  | 1.40E-10 |
| OS01G0852400 | 38.06996   | 8.8588     | 2.1035   | 0.01676  |
| OS01G0853600 | 60.17005   | 164.87975  | -1.4543  | 4.07E-07 |
| OS01G0854000 | 348.05219  | 619.21189  | -0.83113 | 0.00363  |
| OS01G0855200 | 48.51295   | 156.78456  | -1.6923  | 1.25E-08 |
| OS01G0857300 | 80.33778   | 139.25417  | -0.79357 | 0.01403  |
| OS01G0857400 | 1341.33108 | 2097.70577 | -0.64515 | 0.0029   |
| OS01G0858350 | 294.63541  | 100.33844  | 1.5541   | 0.00028  |
| OS01G0858700 | 20.17406   | 88.34807   | -2.1307  | 1.08E-08 |
| OS01G0858900 | 443.06325  | 745.15893  | -0.75004 | 0.0008   |
| OS01G0859200 | 769.35811  | 2594.04566 | -1.7535  | 2.35E-21 |
| OS01G0860300 | 49.21712   | 99.06849   | -1.0093  | 0.00384  |

---

---

|              |            |            |          |          |
|--------------|------------|------------|----------|----------|
| OS01G0861000 | 39.20535   | 94.23824   | -1.2653  | 0.00031  |
| OS01G0862800 | 26.99943   | 1.8967     | 3.8314   | 0.00062  |
| OS01G0865400 | 97.80021   | 28.16946   | 1.7957   | 8.62E-08 |
| OS01G0866600 | 1159.69188 | 739.80573  | 0.64852  | 0.0031   |
| OS01G0867300 | 207.80418  | 480.45012  | -1.2092  | 4.77E-08 |
| OS01G0867400 | 31.06678   | 70.63409   | -1.185   | 0.00339  |
| OS01G0869200 | 608.18244  | 399.55389  | 0.60611  | 0.0104   |
| OS01G0870201 | 17.94116   | 44.79395   | -1.32    | 0.00978  |
| OS01G0870400 | 179.04038  | 50.55925   | 1.8242   | 9.07E-07 |
| OS01G0871500 | 370.59277  | 1723.32743 | -2.2173  | 1.26E-06 |
| OS01G0872400 | 43.97177   | 110.21192  | -1.3256  | 0.00015  |
| OS01G0872700 | 494.53591  | 748.17105  | -0.59729 | 0.00975  |
| OS01G0874100 | 118.90881  | 275.58363  | -1.2126  | 2.02E-05 |
| OS01G0874700 | 181.32687  | 375.34697  | -1.0496  | 0.00099  |
| OS01G0874800 | 52.57152   | 166.18406  | -1.6604  | 1.29E-07 |
| OS01G0875400 | 94.05735   | 186.78663  | -0.98978 | 0.00039  |
| OS01G0876500 | 61.40037   | 130.54507  | -1.0882  | 0.00611  |
| OS01G0876650 | 9.94542    | 30.7225    | -1.6272  | 0.00724  |
| OS01G0877300 | 128.74911  | 222.37304  | -0.78842 | 0.02071  |
| OS01G0877600 | 118.21844  | 214.23388  | -0.85773 | 0.04198  |
| OS01G0881300 | 1616.15064 | 788.83992  | 1.0348   | 6.74E-06 |
| OS01G0884400 | 32.39746   | 66.97445   | -1.0477  | 0.01121  |
| OS01G0884900 | 491.64784  | 263.38674  | 0.90044  | 7.26E-05 |
| OS01G0885700 | 41.65753   | 17.38463   | 1.2608   | 0.01583  |
| OS01G0886900 | 2809.27887 | 1676.49061 | 0.74476  | 0.00023  |
| OS01G0887400 | 89.55768   | 53.22597   | 0.75069  | 0.04472  |
| OS01G0888200 | 12.51796   | 36.31061   | -1.5364  | 0.01525  |

---

---

|              |             |            |          |          |
|--------------|-------------|------------|----------|----------|
| OS01G0888900 | 31.26463    | 132.71508  | -2.0857  | 6.19E-11 |
| OS01G0889000 | 322.69963   | 466.20056  | -0.53076 | 0.036    |
| OS01G0889900 | 56.69903    | 208.82171  | -1.8809  | 3.94E-12 |
| OS01G0891601 | 7.90671     | 46.09202   | -2.5434  | 8.51E-07 |
| OS01G0892500 | 122.53779   | 321.70591  | -1.3925  | 7.37E-09 |
| OS01G0892600 | 2723.5731   | 1654.13695 | 0.71942  | 0.00042  |
| OS01G0893400 | 363.30948   | 552.65815  | -0.60519 | 0.01315  |
| OS01G0894300 | 1154.21931  | 1639.29712 | -0.50616 | 0.02593  |
| OS01G0895100 | 1594.43222  | 1090.41489 | 0.54817  | 0.0126   |
| OS01G0896500 | 12647.50727 | 7122.33001 | 0.82843  | 1.60E-05 |
| OS01G0897500 | 46.51688    | 81.61347   | -0.81105 | 0.03744  |
| OS01G0897600 | 739.71587   | 450.07863  | 0.71679  | 0.00103  |
| OS01G0898600 | 87.68192    | 31.6876    | 1.4684   | 2.99E-05 |
| OS01G0898800 | 20340.69525 | 7097.99108 | 1.5189   | 3.41E-17 |
| OS01G0900900 | 1086.97061  | 612.06296  | 0.82856  | 7.04E-05 |
| OS01G0901500 | 522.77218   | 345.66277  | 0.59682  | 0.0126   |
| OS01G0901600 | 373.98073   | 76.94262   | 2.2811   | 0.00172  |
| OS01G0901800 | 114.20636   | 177.2522   | -0.63416 | 0.03879  |
| OS01G0904200 | 2104.30019  | 1429.87881 | 0.55745  | 0.01087  |
| OS01G0905800 | 5470.57069  | 3997.98664 | 0.45242  | 0.04146  |
| OS01G0908200 | 572.65751   | 186.87317  | 1.6156   | 0.00053  |
| OS01G0908700 | 351.27746   | 525.57381  | -0.58128 | 0.02436  |
| OS01G0909100 | 5.56853     | 20.98578   | -1.914   | 0.01358  |
| OS01G0909300 | 17.90728    | 5.09858    | 1.8124   | 0.04019  |
| OS01G0910200 | 19.86575    | 42.12109   | -1.0843  | 0.0494   |
| OS01G0911200 | 393.70863   | 672.98888  | -0.77345 | 0.00036  |
| OS01G0911300 | 1284.8244   | 840.88949  | 0.61158  | 0.00613  |

---



---

|              |            |            |          |          |
|--------------|------------|------------|----------|----------|
| OS01G0912700 | 7877.87789 | 4795.05888 | 0.71626  | 0.00031  |
| OS01G0912850 | 2.73918    | 89.94955   | -5.0373  | 1.36E-23 |
| OS01G0915800 | 111.00477  | 186.63331  | -0.74958 | 0.00805  |
| OS01G0915900 | 95.60014   | 240.71237  | -1.3322  | 1.47E-07 |
| OS01G0916000 | 1.21796    | 25.92906   | -4.412   | 4.38E-07 |
| OS01G0916100 | 82.57442   | 292.41494  | -1.8243  | 2.78E-07 |
| OS01G0917400 | 4294.62087 | 2321.82691 | 0.88727  | 0.00174  |
| OS01G0918300 | 4797.52776 | 3162.18545 | 0.60137  | 0.00376  |
| OS01G0919600 | 4391.6311  | 3000.98205 | 0.54932  | 0.00939  |
| OS01G0919800 | 1991.7001  | 1208.01259 | 0.72136  | 0.00067  |
| OS01G0919900 | 483.25081  | 308.83048  | 0.64596  | 0.00659  |
| OS01G0920500 | 6.03965    | 41.53114   | -2.7817  | 2.01E-05 |
| OS01G0920700 | 4.37311    | 23.15775   | -2.4048  | 0.00137  |
| OS01G0923300 | 1030.58561 | 704.70047  | 0.54838  | 0.01641  |
| OS01G0923900 | 448.03567  | 273.58799  | 0.71161  | 0.00384  |
| OS01G0924000 | 1799.71606 | 1169.04117 | 0.62244  | 0.01508  |
| OS01G0924200 | 70.37487   | 16.40841   | 2.1006   | 1.16E-07 |
| OS01G0924300 | 105.76467  | 177.69458  | -0.74854 | 0.01061  |
| OS01G0924400 | 3070.3855  | 2163.56485 | 0.50501  | 0.02155  |
| OS01G0925400 | 408.89388  | 249.89359  | 0.71041  | 0.0035   |
| OS01G0926800 | 5261.66216 | 2222.90312 | 1.2431   | 5.75E-08 |
| OS01G0927500 | 105.00145  | 61.47834   | 0.77226  | 0.02899  |
| OS01G0927600 | 8466.64193 | 5882.65812 | 0.52532  | 0.01201  |
| OS01G0928000 | 1486.15549 | 793.37838  | 0.9055   | 5.57E-06 |
| OS01G0928300 | 42.98451   | 84.42333   | -0.97383 | 0.01217  |
| OS01G0928800 | 320.34531  | 515.66734  | -0.68681 | 0.00362  |
| OS01G0929100 | 1958.62078 | 1198.37136 | 0.70876  | 0.04589  |

---

---

|              |            |            |          |          |
|--------------|------------|------------|----------|----------|
| OS01G0930400 | 135.32012  | 663.59635  | -2.2939  | 1.47E-26 |
| OS01G0930800 | 1194.19225 | 374.5282   | 1.6729   | 1.65E-17 |
| OS01G0930900 | 85.37256   | 22.02679   | 1.9545   | 5.76E-08 |
| OS01G0930950 | 407.78888  | 102.63542  | 1.9903   | 1.41E-18 |
| OS01G0931000 | 1584.06598 | 388.08727  | 2.0292   | 4.86E-14 |
| OS01G0931300 | 23.14873   | 72.24519   | -1.642   | 0.00017  |
| OS01G0933200 | 783.56234  | 389.6126   | 1.008    | 0.01784  |
| OS01G0933500 | 137.65991  | 255.86332  | -0.89426 | 0.01997  |
| OS01G0933600 | 1947.6155  | 1304.86551 | 0.57781  | 0.00744  |
| OS01G0933900 | 82.21605   | 132.29609  | -0.68628 | 0.04075  |
| OS01G0934350 | 143.67407  | 63.90753   | 1.1687   | 0.0041   |
| OS01G0934400 | 438.65478  | 198.53554  | 1.1437   | 6.24E-05 |
| OS01G0935200 | 1.19164    | 8.94181    | -2.9076  | 0.04886  |
| OS01G0935600 | 953.44285  | 589.96533  | 0.69252  | 0.00155  |
| OS01G0935700 | 495.2317   | 322.52376  | 0.6187   | 0.01336  |
| OS01G0936600 | 40.80668   | 159.77572  | -1.9692  | 1.51E-11 |
| OS01G0938100 | 2431.51955 | 1274.88503 | 0.93149  | 0.01243  |
| OS01G0938600 | 91.72672   | 144.43742  | -0.65503 | 0.04935  |
| OS01G0938900 | 379.28603  | 558.70538  | -0.5588  | 0.02011  |
| OS01G0939000 | 8.98563    | 24.63659   | -1.4551  | 0.04099  |
| OS01G0939700 | 282.82264  | 174.75182  | 0.69459  | 0.00849  |
| OS01G0940100 | 313.80052  | 161.99004  | 0.95394  | 9.78E-05 |
| OS01G0946500 | 265.50922  | 1.19418    | 7.7966   | 0.01129  |
| OS01G0947700 | 73.35095   | 203.2716   | -1.4705  | 4.74E-08 |
| OS01G0948900 | 67.40147   | 142.27752  | -1.0779  | 0.00305  |
| OS01G0949300 | 828.06157  | 1478.86249 | -0.83668 | 6.76E-05 |
| OS01G0949500 | 1365.64664 | 924.223    | 0.56327  | 0.01111  |

---

---

|              |            |            |          |           |
|--------------|------------|------------|----------|-----------|
| OS01G0951500 | 2062.43778 | 1465.26449 | 0.49319  | 0.02591   |
| OS01G0952600 | 488.95678  | 711.54386  | -0.54125 | 0.02697   |
| OS01G0952800 | 3.90071    | 350.00179  | -6.4875  | 0.03276   |
| OS01G0953500 | 606.35812  | 231.64166  | 1.3883   | 1.19E-07  |
| OS01G0954000 | 1991.20074 | 1025.24598 | 0.95767  | 1.07E-06  |
| OS01G0956075 | 10.17977   | 40.22249   | -1.9823  | 0.00032   |
| OS01G0956800 | 0.79442    | 13.05495   | -4.0385  | 0.00143   |
| OS01G0957900 | 27.81012   | 54.09339   | -0.95984 | 0.04068   |
| OS01G0958800 | 201.73926  | 324.19843  | -0.68439 | 0.00869   |
| OS01G0959750 | 354.07373  | 70.27802   | 2.3329   | 2.07E-07  |
| OS01G0960400 | 109.49879  | 335.47996  | -1.6153  | 6.16E-11  |
| OS01G0960500 | 2440.51798 | 1578.73984 | 0.62841  | 0.00254   |
| OS01G0961200 | 224.03872  | 125.27842  | 0.83861  | 0.00239   |
| OS01G0962100 | 22.41829   | 5.13555    | 2.1261   | 0.00335   |
| OS01G0962700 | 200.05735  | 720.85739  | -1.8493  | 9.64E-19  |
| OS01G0963000 | 34.83206   | 1912.32654 | -5.7788  | 1.35E-130 |
| OS01G0964333 | 437.09131  | 256.40259  | 0.76952  | 0.00079   |
| OS01G0966300 | 49.0141    | 96.43434   | -0.97635 | 0.00665   |
| OS01G0969200 | 16.79083   | 46.68915   | -1.4754  | 0.00204   |
| OS01G0971900 | 13.53922   | 32.94642   | -1.283   | 0.02555   |
| OS01G0973100 | 38.01243   | 17.04803   | 1.1569   | 0.02673   |
| OS01G0974200 | 1078.62598 | 462.21662  | 1.2226   | 0.0006    |
| OS01G0974400 | 806.23243  | 503.15562  | 0.68019  | 0.00197   |
| OS01G0975300 | 1184.44129 | 3920.01525 | -1.7267  | 0.01208   |
| OS01G0975900 | 671.42288  | 164.02712  | 2.0333   | 0.0103    |
| OS01G0976800 | 20.81433   | 46.6763    | -1.1651  | 0.01725   |
| OS01G0978100 | 4310.05571 | 2449.39475 | 0.81528  | 5.58E-05  |

---

---

|              |             |            |          |          |
|--------------|-------------|------------|----------|----------|
| OS01G0978400 | 176.50903   | 115.53279  | 0.61144  | 0.04874  |
| OS02G0100800 | 12.23346    | 31.30292   | -1.3555  | 0.03191  |
| OS02G0101000 | 170.27395   | 323.19973  | -0.92457 | 0.00124  |
| OS02G0102200 | 30.49164    | 12.47642   | 1.2892   | 0.04334  |
| OS02G0102400 | 41.98961    | 82.72101   | -0.97822 | 0.00958  |
| OS02G0103900 | 23.38313    | 46.40253   | -0.98874 | 0.04376  |
| OS02G0105800 | 3.5336      | 14.52109   | -2.0389  | 0.04347  |
| OS02G0106100 | 1969.51535  | 595.8802   | 1.7247   | 3.50E-12 |
| OS02G0106800 | 977.21321   | 623.63577  | 0.64797  | 0.00371  |
| OS02G0109100 | 595.03214   | 415.20208  | 0.51915  | 0.03574  |
| OS02G0109200 | 1135.28517  | 775.08284  | 0.55063  | 0.01324  |
| OS02G0110400 | 44.62222    | 88.46836   | -0.9874  | 0.00945  |
| OS02G0111600 | 56.68141    | 232.71633  | -2.0376  | 4.22E-12 |
| OS02G0111700 | 255.90456   | 378.48953  | -0.56465 | 0.03269  |
| OS02G0114300 | 727.45858   | 440.18763  | 0.72475  | 0.00679  |
| OS02G0114400 | 486.61567   | 296.75205  | 0.71352  | 0.00214  |
| OS02G0114700 | 122.64453   | 217.06659  | -0.82365 | 0.00259  |
| OS02G0115700 | 218.68307   | 550.75429  | -1.3326  | 6.13E-10 |
| OS02G0116000 | 237.15297   | 368.52994  | -0.63596 | 0.00931  |
| OS02G0116500 | 966.39092   | 628.77654  | 0.62006  | 0.00562  |
| OS02G0117500 | 116.72511   | 23.10083   | 2.3371   | 2.13E-12 |
| OS02G0117600 | 80.87403    | 37.77335   | 1.0983   | 0.00351  |
| OS02G0120200 | 60.39311    | 29.49686   | 1.0338   | 0.01972  |
| OS02G0121300 | 12613.94085 | 8458.07839 | 0.57662  | 0.00493  |
| OS02G0121500 | 630.55288   | 193.75488  | 1.7024   | 3.73E-16 |
| OS02G0121700 | 12.85369    | 0          |          | 0.02265  |
| OS02G0122500 | 1122.56785  | 595.93818  | 0.91357  | 0.01789  |

---

---

|              |            |            |          |          |
|--------------|------------|------------|----------|----------|
| OS02G0122800 | 127.33844  | 389.38723  | -1.6125  | 1.16E-12 |
| OS02G0123200 | 642.21385  | 978.94283  | -0.60817 | 0.00609  |
| OS02G0126700 | 102.1445   | 171.70129  | -0.74929 | 0.01358  |
| OS02G0127700 | 144.29447  | 232.49084  | -0.68816 | 0.01483  |
| OS02G0134300 | 191.81906  | 497.18014  | -1.374   | 4.26E-10 |
| OS02G0135200 | 46.81386   | 115.84723  | -1.3072  | 4.00E-05 |
| OS02G0135600 | 530.21031  | 366.91033  | 0.53114  | 0.03429  |
| OS02G0135700 | 62.26756   | 129.51375  | -1.0566  | 0.00088  |
| OS02G0135900 | 284.04413  | 153.95113  | 0.88364  | 0.00042  |
| OS02G0136150 | 239.86693  | 102.72363  | 1.2235   | 2.34E-06 |
| OS02G0136800 | 69.19071   | 143.05657  | -1.0479  | 0.00046  |
| OS02G0137700 | 4390.42276 | 2742.50564 | 0.67887  | 0.00073  |
| OS02G0139700 | 3962.66057 | 6153.9175  | -0.63504 | 0.00196  |
| OS02G0140300 | 58.74657   | 109.1542   | -0.89379 | 0.0097   |
| OS02G0141100 | 123.56892  | 238.59284  | -0.94923 | 0.02064  |
| OS02G0141300 | 407.53483  | 282.09391  | 0.53075  | 0.0365   |
| OS02G0143100 | 767.64325  | 502.9173   | 0.61011  | 0.00889  |
| OS02G0145000 | 278.88947  | 402.1049   | -0.52788 | 0.03726  |
| OS02G0145600 | 100.62103  | 188.61028  | -0.90648 | 0.00167  |
| OS02G0147600 | 52.15427   | 103.78964  | -0.99281 | 0.00414  |
| OS02G0148100 | 882.79495  | 618.57456  | 0.51313  | 0.03397  |
| OS02G0149900 | 108.57763  | 54.18941   | 1.0026   | 0.00313  |
| OS02G0150300 | 21.33559   | 65.75001   | -1.6237  | 9.81E-05 |
| OS02G0152200 | 93.78054   | 168.46356  | -0.84508 | 0.00438  |
| OS02G0152500 | 281.11849  | 463.96233  | -0.72283 | 0.0024   |
| OS02G0152600 | 86.03054   | 162.05839  | -0.91359 | 0.00193  |
| OS02G0153200 | 159.03148  | 69.83089   | 1.1874   | 0.00028  |

---

---

|              |             |             |          |          |
|--------------|-------------|-------------|----------|----------|
| OS02G0157700 | 802.56241   | 570.14598   | 0.49328  | 0.04318  |
| OS02G0157950 | 848.20795   | 507.98853   | 0.73962  | 0.00078  |
| OS02G0160250 | 71.59283    | 35.04824    | 1.0305   | 0.01069  |
| OS02G0160500 | 21860.91116 | 13273.98155 | 0.71975  | 0.00031  |
| OS02G0163500 | 100.96047   | 52.21664    | 0.95121  | 0.00708  |
| OS02G0165200 | 1.56631     | 12.76856    | -3.0272  | 0.00878  |
| OS02G0167100 | 433.94779   | 265.18168   | 0.71054  | 0.00318  |
| OS02G0168100 | 3202.74853  | 1392.80966  | 1.2013   | 0.00022  |
| OS02G0170900 | 72.36836    | 41.5443     | 0.80071  | 0.04768  |
| OS02G0173000 | 25.64363    | 50.78747    | -0.98587 | 0.03044  |
| OS02G0173800 | 194.09666   | 301.6605    | -0.63615 | 0.0178   |
| OS02G0175000 | 80.3593     | 9.47256     | 3.0846   | 0.00333  |
| OS02G0176300 | 0.74556     | 10.00852    | -3.7468  | 0.01215  |
| OS02G0178400 | 470.81723   | 833.31998   | -0.8237  | 0.00016  |
| OS02G0180700 | 487.22521   | 329.76652   | 0.56314  | 0.02319  |
| OS02G0184300 | 1384.90233  | 960.15162   | 0.52845  | 0.02319  |
| OS02G0186400 | 499.48704   | 316.92936   | 0.65629  | 0.00632  |
| OS02G0186900 | 215.48895   | 126.32434   | 0.77048  | 0.02329  |
| OS02G0189000 | 1966.78251  | 1396.20322  | 0.49433  | 0.02993  |
| OS02G0194600 | 53.17926    | 16.21094    | 1.7139   | 9.42E-05 |
| OS02G0194700 | 46901.91173 | 6370.83795  | 2.8801   | 7.20E-10 |
| OS02G0196600 | 498.63746   | 291.44324   | 0.77478  | 0.00078  |
| OS02G0196800 | 355.22993   | 200.70256   | 0.82369  | 0.00066  |
| OS02G0197125 | 4338.05602  | 1633.39093  | 1.4092   | 1.06E-10 |
| OS02G0197200 | 712.29817   | 282.62448   | 1.3336   | 2.07E-10 |
| OS02G0197600 | 49776.54498 | 27766.70783 | 0.84211  | 0.00019  |
| OS02G0199200 | 73.57519    | 460.75235   | -2.6467  | 3.45E-26 |

---

---

|              |            |             |          |          |
|--------------|------------|-------------|----------|----------|
| OS02G0199300 | 51.34978   | 164.76559   | -1.682   | 3.96E-09 |
| OS02G0200300 | 245.12357  | 424.33762   | -0.7917  | 0.00101  |
| OS02G0201300 | 219.91222  | 126.07303   | 0.80267  | 0.00378  |
| OS02G0203401 | 75.69028   | 41.22859    | 0.87646  | 0.02971  |
| OS02G0203500 | 70.34477   | 39.97671    | 0.81528  | 0.04349  |
| OS02G0204400 | 160.15081  | 65.57886    | 1.2881   | 7.83E-05 |
| OS02G0204500 | 578.07434  | 398.49812   | 0.53668  | 0.03413  |
| OS02G0205000 | 58.92199   | 102.25744   | -0.79533 | 0.02887  |
| OS02G0205100 | 13.26479   | 49.5471     | -1.9012  | 6.72E-05 |
| OS02G0206700 | 6164.04619 | 1868.86939  | 1.7217   | 3.10E-07 |
| OS02G0213100 | 1.88833    | 46.11788    | -4.6101  | 3.06E-12 |
| OS02G0216200 | 11.99796   | 0           |          | 0.00184  |
| OS02G0216300 | 7269.34749 | 20645.97125 | -1.506   | 6.74E-17 |
| OS02G0218200 | 800.12939  | 1163.99518  | -0.54078 | 0.03955  |
| OS02G0219900 | 547.4377   | 795.39838   | -0.53898 | 0.0285   |
| OS02G0220500 | 485.84126  | 691.76966   | -0.50981 | 0.03843  |
| OS02G0221400 | 258.69272  | 154.96401   | 0.73931  | 0.00528  |
| OS02G0224900 | 263.22514  | 391.56327   | -0.57295 | 0.02392  |
| OS02G0228300 | 792.21348  | 1658.07416  | -1.0655  | 2.84E-06 |
| OS02G0229000 | 402.1263   | 617.83283   | -0.61957 | 0.0073   |
| OS02G0230875 | 22.20899   | 4.70483     | 2.2389   | 0.00204  |
| OS02G0232000 | 198.66061  | 88.65866    | 1.164    | 1.16E-05 |
| OS02G0232500 | 125.79455  | 219.49115   | -0.80309 | 0.00326  |
| OS02G0234300 | 1140.02052 | 684.22643   | 0.73651  | 0.00043  |
| OS02G0234500 | 2726.08757 | 1758.42526  | 0.63255  | 0.00305  |
| OS02G0236800 | 25.75757   | 61.00679    | -1.244   | 0.00397  |
| OS02G0238500 | 16.66428   | 40.85312    | -1.2937  | 0.01132  |

---

---

|              |            |            |          |          |
|--------------|------------|------------|----------|----------|
| OS02G0242900 | 0.42353    | 42.79753   | -6.6589  | 3.45E-14 |
| OS02G0244600 | 204.35052  | 120.7549   | 0.75896  | 0.00835  |
| OS02G0247800 | 243.19634  | 152.27775  | 0.67542  | 0.01105  |
| OS02G0250400 | 1315.66677 | 879.58461  | 0.5809   | 0.00759  |
| OS02G0251800 | 23.98582   | 54.30159   | -1.1788  | 0.02533  |
| OS02G0254700 | 1177.89413 | 842.88902  | 0.4828   | 0.04039  |
| OS02G0255500 | 2790.30934 | 1963.22103 | 0.5072   | 0.0201   |
| OS02G0256200 | 13.02916   | 83.27813   | -2.6762  | 0.01518  |
| OS02G0258000 | 130.76921  | 73.62202   | 0.82881  | 0.00982  |
| OS02G0258800 | 855.35506  | 362.93639  | 1.2368   | 0.0077   |
| OS02G0259100 | 1237.19395 | 841.56143  | 0.55593  | 0.01163  |
| OS02G0260200 | 165.21651  | 65.24762   | 1.3404   | 0.00086  |
| OS02G0261400 | 58.96848   | 236.29849  | -2.0026  | 1.32E-14 |
| OS02G0266800 | 800.84485  | 536.31999  | 0.57843  | 0.02354  |
| OS02G0267000 | 38.63899   | 85.7985    | -1.1509  | 0.00196  |
| OS02G0271000 | 2.13894    | 16.05171   | -2.9078  | 0.0044   |
| OS02G0273700 | 825.80268  | 522.0761   | 0.66154  | 0.00371  |
| OS02G0274900 | 6007.32717 | 3853.85049 | 0.64042  | 0.00174  |
| OS02G0275200 | 382.2976   | 1223.93951 | -1.6788  | 2.14E-17 |
| OS02G0276400 | 287.41487  | 166.81428  | 0.78489  | 0.0025   |
| OS02G0276500 | 1128.62351 | 640.53978  | 0.8172   | 8.73E-05 |
| OS02G0277700 | 67.35995   | 129.91727  | -0.94763 | 0.01671  |
| OS02G0282900 | 39.77043   | 74.72019   | -0.9098  | 0.02452  |
| OS02G0284600 | 909.68374  | 1352.72615 | -0.57243 | 0.0114   |
| OS02G0285800 | 9627.93746 | 5756.52989 | 0.74203  | 0.00017  |
| OS02G0285900 | 1160.34868 | 548.24782  | 1.0817   | 0.03712  |
| OS02G0286200 | 121.95154  | 185.92584  | -0.60842 | 0.0404   |

---



---

|              |            |            |          |          |
|--------------|------------|------------|----------|----------|
| OS02G0288200 | 230.47173  | 336.00032  | -0.54387 | 0.04413  |
| OS02G0288600 | 45.97184   | 93.85144   | -1.0296  | 0.00301  |
| OS02G0289700 | 70.69439   | 125.83812  | -0.8319  | 0.01213  |
| OS02G0291000 | 34.80463   | 10.92917   | 1.6711   | 0.00263  |
| OS02G0291500 | 18.49996   | 60.06028   | -1.6989  | 7.32E-05 |
| OS02G0297132 | 0.34835    | 11.01982   | -4.9834  | 0.00233  |
| OS02G0297550 | 24.92069   | 0          |          | 0.00441  |
| OS02G0300700 | 769.75467  | 540.62942  | 0.50976  | 0.03543  |
| OS02G0302200 | 499.68783  | 287.49424  | 0.79749  | 0.0324   |
| OS02G0303000 | 0          | 29.96614   |          | 5.99E-11 |
| OS02G0303500 | 102.60183  | 6.36481    | 4.0108   | 1.09E-15 |
| OS02G0310200 | 637.7453   | 919.30617  | -0.52757 | 0.02166  |
| OS02G0312800 | 13.88252   | 34.37921   | -1.3083  | 0.02709  |
| OS02G0314300 | 830.57872  | 191.84673  | 2.1142   | 6.50E-11 |
| OS02G0316200 | 690.92     | 447.90068  | 0.62534  | 0.00591  |
| OS02G0318450 | 861.84984  | 303.27743  | 1.5068   | 1.25E-05 |
| OS02G0318500 | 649.63329  | 223.12198  | 1.5418   | 9.70E-05 |
| OS02G0318600 | 413.94234  | 156.99898  | 1.3987   | 0.00103  |
| OS02G0319400 | 11.36513   | 34.24047   | -1.5911  | 0.00522  |
| OS02G0321900 | 175.79612  | 258.50257  | -0.55628 | 0.04965  |
| OS02G0323000 | 113.97587  | 46.22154   | 1.3021   | 4.33E-05 |
| OS02G0323600 | 3096.37888 | 1034.46865 | 1.5817   | 5.76E-07 |
| OS02G0324700 | 76.23412   | 158.8792   | -1.0594  | 0.00267  |
| OS02G0326500 | 118.94927  | 217.83715  | -0.8729  | 0.00107  |
| OS02G0327500 | 28.62959   | 76.25822   | -1.4134  | 0.00032  |
| OS02G0327700 | 250.13555  | 360.15674  | -0.52591 | 0.04921  |
| OS02G0328300 | 592.83714  | 357.27601  | 0.7306   | 0.00148  |

---

---

|              |            |            |          |          |
|--------------|------------|------------|----------|----------|
| OS02G0331200 | 58.96207   | 111.13256  | -0.91442 | 0.00585  |
| OS02G0437300 | 212.99184  | 508.99812  | -1.2569  | 1.01E-08 |
| OS02G0455400 | 121.81105  | 260.52955  | -1.0968  | 0.03726  |
| OS02G0456800 | 699.71377  | 493.92206  | 0.50248  | 0.04933  |
| OS02G0464400 | 121.5494   | 184.80653  | -0.60447 | 0.04392  |
| OS02G0467300 | 6.04343    | 0.24957    | 4.5978   | 0.03661  |
| OS02G0467600 | 5.62117    | 0          |          | 0.02147  |
| OS02G0471500 | 2933.73793 | 1971.23614 | 0.57364  | 0.00667  |
| OS02G0472500 | 146.45973  | 91.57611   | 0.67746  | 0.03574  |
| OS02G0472700 | 270.63656  | 171.08453  | 0.66165  | 0.01581  |
| OS02G0473200 | 404.98445  | 269.06015  | 0.58994  | 0.01663  |
| OS02G0475400 | 220.25803  | 90.55653   | 1.2823   | 1.00E-06 |
| OS02G0478500 | 22.98715   | 53.82641   | -1.2275  | 0.0088   |
| OS02G0478700 | 375.15461  | 538.58355  | -0.52168 | 0.0385   |
| OS02G0480200 | 219.31441  | 140.89957  | 0.63833  | 0.02541  |
| OS02G0481900 | 596.83382  | 261.02732  | 1.1931   | 1.83E-08 |
| OS02G0484975 | 235.93742  | 61.93941   | 1.9295   | 3.47E-14 |
| OS02G0488600 | 958.30894  | 553.537    | 0.79181  | 0.00022  |
| OS02G0489400 | 181.64158  | 346.0539   | -0.9299  | 9.15E-05 |
| OS02G0491400 | 232.01158  | 342.4403   | -0.56166 | 0.02885  |
| OS02G0494400 | 107.64799  | 33.54694   | 1.6821   | 3.70E-07 |
| OS02G0495400 | 151.05348  | 231.52099  | -0.61608 | 0.03156  |
| OS02G0496500 | 37.38588   | 75.5337    | -1.0146  | 0.01163  |
| OS02G0497400 | 0.39721    | 13.22877   | -5.0576  | 0.00045  |
| OS02G0498100 | 141.35757  | 250.98761  | -0.82827 | 0.02238  |
| OS02G0498300 | 1262.03596 | 833.29284  | 0.59886  | 0.00787  |
| OS02G0498666 | 906.53324  | 337.77116  | 1.4243   | 0.00742  |

---

---

|              |            |            |          |          |
|--------------|------------|------------|----------|----------|
| OS02G0498700 | 504.68687  | 356.55426  | 0.50127  | 0.04415  |
| OS02G0499000 | 3172.36728 | 1545.81449 | 1.0372   | 9.02E-08 |
| OS02G0503700 | 58.75535   | 8.6905     | 2.7572   | 1.23E-09 |
| OS02G0506600 | 4467.35055 | 2536.55856 | 0.81655  | 2.11E-05 |
| OS02G0507100 | 0.34835    | 9.05816    | -4.7006  | 0.0201   |
| OS02G0512000 | 0.77188    | 9.42235    | -3.6096  | 0.01973  |
| OS02G0515000 | 871.60874  | 522.35087  | 0.73866  | 0.00075  |
| OS02G0515200 | 451.46118  | 281.61704  | 0.68087  | 0.00519  |
| OS02G0517900 | 208.23661  | 39.15042   | 2.4111   | 0.00991  |
| OS02G0520750 | 211.067    | 139.86408  | 0.59368  | 0.0495   |
| OS02G0522700 | 269.6553   | 406.53516  | -0.59226 | 0.01815  |
| OS02G0522800 | 89.60885   | 197.16416  | -1.1377  | 0.00795  |
| OS02G0523500 | 891.11997  | 1289.41239 | -0.53302 | 0.01989  |
| OS02G0525100 | 99.82648   | 56.08383   | 0.83184  | 0.0189   |
| OS02G0525600 | 386.05632  | 1319.83933 | -1.7735  | 0.00025  |
| OS02G0525900 | 25.56967   | 95.77021   | -1.9051  | 8.40E-08 |
| OS02G0526400 | 622.49518  | 1974.3543  | -1.6652  | 0.00016  |
| OS02G0527200 | 961.32982  | 369.75101  | 1.3785   | 1.43E-05 |
| OS02G0527500 | 1.54376    | 25.36686   | -4.0384  | 2.50E-06 |
| OS02G0527600 | 1013.21243 | 5955.63263 | -2.5553  | 3.44E-13 |
| OS02G0527900 | 126.39359  | 275.29446  | -1.1231  | 0.03191  |
| OS02G0528000 | 1117.38638 | 494.96823  | 1.1747   | 1.98E-09 |
| OS02G0532500 | 225.70463  | 956.47566  | -2.0833  | 9.58E-25 |
| OS02G0532800 | 3311.34401 | 2174.75095 | 0.60657  | 0.00323  |
| OS02G0533000 | 2080.28387 | 1401.74825 | 0.56955  | 0.00935  |
| OS02G0533300 | 48.82874   | 19.23688   | 1.3439   | 0.00475  |
| OS02G0533700 | 85.48422   | 161.87291  | -0.92113 | 0.01163  |

---

---

|              |             |            |          |          |
|--------------|-------------|------------|----------|----------|
| OS02G0535901 | 2.28932     | 40.06666   | -4.1294  | 0.004    |
| OS02G0536400 | 67.28106    | 116.28467  | -0.78939 | 0.02082  |
| OS02G0536500 | 654.94448   | 245.68837  | 1.4145   | 0.01158  |
| OS02G0539100 | 3047.68246  | 1745.36416 | 0.80418  | 3.81E-05 |
| OS02G0539500 | 90.16288    | 186.98727  | -1.0523  | 0.00029  |
| OS02G0540700 | 172.79621   | 63.99456   | 1.4331   | 0.00508  |
| OS02G0541325 | 153.40793   | 346.22232  | -1.1743  | 6.49E-07 |
| OS02G0542400 | 79.52094    | 228.9754   | -1.5258  | 0.0075   |
| OS02G0545000 | 59.13762    | 97.75946   | -0.72516 | 0.04785  |
| OS02G0549700 | 1138.60484  | 815.4727   | 0.48156  | 0.04188  |
| OS02G0550700 | 86.22477    | 143.5003   | -0.73488 | 0.01567  |
| OS02G0551600 | 9.29632     | 1.17022    | 2.9899   | 0.0444   |
| OS02G0551700 | 21.24414    | 47.60609   | -1.1641  | 0.02281  |
| OS02G0553600 | 108.20942   | 166.77267  | -0.62406 | 0.04394  |
| OS02G0554900 | 3.58247     | 24.82175   | -2.7926  | 0.00016  |
| OS02G0555700 | 164.96725   | 77.79877   | 1.0844   | 0.0002   |
| OS02G0556100 | 285.34105   | 183.13077  | 0.63981  | 0.01802  |
| OS02G0556800 | 10641.76336 | 6594.48712 | 0.6904   | 0.00035  |
| OS02G0556900 | 583.6554    | 345.75326  | 0.75537  | 0.00091  |
| OS02G0561900 | 4.52599     | 24.85124   | -2.457   | 0.00105  |
| OS02G0562600 | 1.16909     | 10.26921   | -3.1349  | 0.02129  |
| OS02G0562700 | 1879.36135  | 1036.61031 | 0.85837  | 1.53E-05 |
| OS02G0563800 | 815.92519   | 478.9157   | 0.76867  | 0.00038  |
| OS02G0564300 | 859.71116   | 602.32548  | 0.51331  | 0.02714  |
| OS02G0564400 | 1322.08746  | 895.44346  | 0.56214  | 0.01046  |
| OS02G0565150 | 45.50317    | 21.02101   | 1.1141   | 0.02025  |
| OS02G0566300 | 284.55423   | 178.86164  | 0.66986  | 0.01286  |

---

---

|              |            |            |          |          |
|--------------|------------|------------|----------|----------|
| OS02G0567100 | 1336.13722 | 963.81315  | 0.47124  | 0.04421  |
| OS02G0568200 | 59.64878   | 17.91658   | 1.7352   | 3.13E-05 |
| OS02G0569000 | 89.21434   | 16.36238   | 2.4469   | 1.87E-11 |
| OS02G0570500 | 19.64146   | 5.78266    | 1.7641   | 0.04536  |
| OS02G0570900 | 134.68496  | 39.10659   | 1.7841   | 5.75E-08 |
| OS02G0571000 | 124.85353  | 37.87891   | 1.7208   | 3.42E-08 |
| OS02G0571100 | 931.78537  | 270.78207  | 1.7829   | 5.00E-17 |
| OS02G0571300 | 249.81345  | 58.41      | 2.0966   | 1.87E-11 |
| OS02G0573200 | 4574.31949 | 2452.77319 | 0.89914  | 2.81E-06 |
| OS02G0573500 | 1.91465    | 25.1783    | -3.717   | 6.07E-06 |
| OS02G0574500 | 900.64877  | 267.50444  | 1.7514   | 3.29E-18 |
| OS02G0574800 | 21.53862   | 4.45699    | 2.2728   | 0.00214  |
| OS02G0575000 | 212.66056  | 64.17011   | 1.7286   | 3.09E-11 |
| OS02G0575200 | 87.81353   | 28.76864   | 1.6099   | 4.49E-06 |
| OS02G0575500 | 8572.69556 | 5157.27982 | 0.73314  | 0.00023  |
| OS02G0575900 | 2.66399    | 14.79273   | -2.4732  | 0.01523  |
| OS02G0576700 | 140.6895   | 260.7298   | -0.89004 | 0.00042  |
| OS02G0579600 | 23.06361   | 8.04339    | 1.5197   | 0.04103  |
| OS02G0579800 | 748.03227  | 1161.6575  | -0.63501 | 0.00359  |
| OS02G0580100 | 118.43789  | 183.51421  | -0.63176 | 0.04207  |
| OS02G0580400 | 57.38324   | 113.0787   | -0.97863 | 0.005    |
| OS02G0580900 | 849.46544  | 442.6442   | 0.94041  | 4.75E-06 |
| OS02G0581900 | 206.9994   | 133.54673  | 0.63228  | 0.02715  |
| OS02G0582100 | 279.26136  | 423.61225  | -0.60113 | 0.01556  |
| OS02G0582600 | 3.52982    | 27.29524   | -2.951   | 3.32E-05 |
| OS02G0584700 | 56.45585   | 102.9025   | -0.86608 | 0.0284   |
| OS02G0586800 | 60.31537   | 117.70793  | -0.96461 | 0.00344  |

---

---

|              |             |            |          |          |
|--------------|-------------|------------|----------|----------|
| OS02G0588700 | 576.41155   | 313.04838  | 0.88071  | 7.21E-05 |
| OS02G0589000 | 849.15869   | 120.01902  | 2.8228   | 0.0029   |
| OS02G0590200 | 63.94663    | 15.59127   | 2.0361   | 0.04604  |
| OS02G0591900 | 2136.401    | 1550.50384 | 0.46245  | 0.04782  |
| OS02G0592600 | 116.4269    | 188.56771  | -0.69566 | 0.02129  |
| OS02G0593500 | 3103.19285  | 1950.40091 | 0.66998  | 0.00141  |
| OS02G0594651 | 365.68881   | 88.41057   | 2.0483   | 4.07E-12 |
| OS02G0594700 | 12.49291    | 2.90974    | 2.1021   | 0.04694  |
| OS02G0595100 | 1219.18799  | 505.34711  | 1.2706   | 1.50E-10 |
| OS02G0595700 | 10327.64309 | 6845.38426 | 0.59331  | 0.00354  |
| OS02G0595800 | 430.67826   | 269.80681  | 0.67468  | 0.00546  |
| OS02G0596700 | 24.28785    | 6.72537    | 1.8525   | 0.01131  |
| OS02G0600400 | 85.11694    | 199.85026  | -1.2314  | 4.96E-06 |
| OS02G0601300 | 145.99489   | 393.14221  | -1.4291  | 4.76E-10 |
| OS02G0601600 | 35.61532    | 77.46676   | -1.1211  | 0.00458  |
| OS02G0603600 | 69.12553    | 1274.13052 | -4.2042  | 1.15E-09 |
| OS02G0603700 | 13.96148    | 77.96339   | -2.4813  | 0.00817  |
| OS02G0606100 | 77.54218    | 138.04865  | -0.83212 | 0.01057  |
| OS02G0606800 | 196.12807   | 451.80136  | -1.2039  | 9.27E-08 |
| OS02G0608000 | 697.38351   | 113.99594  | 2.613    | 6.31E-09 |
| OS02G0609900 | 30.61187    | 68.36286   | -1.1591  | 0.00479  |
| OS02G0610400 | 96.18016    | 165.61357  | -0.78401 | 0.01075  |
| OS02G0610500 | 11416.49885 | 7956.71551 | 0.52088  | 0.01073  |
| OS02G0611400 | 37.56007    | 116.45659  | -1.6325  | 4.90E-07 |
| OS02G0612200 | 34.48766    | 86.05784   | -1.3192  | 0.00028  |
| OS02G0613200 | 35.21561    | 72.82695   | -1.0483  | 0.00759  |
| OS02G0614100 | 167.02225   | 386.3346   | -1.2098  | 2.20E-07 |

---

---

|              |            |            |          |          |
|--------------|------------|------------|----------|----------|
| OS02G0617600 | 2893.41939 | 1805.08036 | 0.68071  | 0.00092  |
| OS02G0618200 | 3.45841    | 15.71164   | -2.1837  | 0.02338  |
| OS02G0620200 | 189.48177  | 111.77408  | 0.76147  | 0.00744  |
| OS02G0621800 | 235.28939  | 529.01051  | -1.1689  | 8.74E-08 |
| OS02G0625000 | 455.98118  | 1635.07418 | -1.8423  | 8.79E-10 |
| OS02G0625300 | 1589.26892 | 737.6426   | 1.1074   | 1.39E-08 |
| OS02G0627100 | 756.99582  | 74.05139   | 3.3537   | 2.18E-24 |
| OS02G0628600 | 818.40714  | 398.08453  | 1.0397   | 5.05E-07 |
| OS02G0629200 | 733.08432  | 212.18666  | 1.7886   | 3.92E-16 |
| OS02G0632800 | 87.09922   | 43.65013   | 0.99667  | 0.00687  |
| OS02G0633200 | 19.08393   | 45.14568   | -1.2422  | 0.01196  |
| OS02G0633300 | 141.40997  | 348.22838  | -1.3001  | 0.00406  |
| OS02G0633400 | 104.54781  | 188.55888  | -0.85085 | 0.00344  |
| OS02G0635000 | 775.61537  | 537.60333  | 0.5288   | 0.02743  |
| OS02G0635200 | 1038.93609 | 598.90124  | 0.79472  | 0.00013  |
| OS02G0636300 | 37.25682   | 100.60251  | -1.4331  | 2.93E-05 |
| OS02G0638000 | 21.41078   | 71.93201   | -1.7483  | 1.05E-05 |
| OS02G0638300 | 2962.19666 | 1646.6417  | 0.84714  | 1.50E-05 |
| OS02G0638900 | 803.69708  | 563.10284  | 0.51325  | 0.03285  |
| OS02G0639100 | 88.76581   | 273.35419  | -1.6227  | 4.05E-11 |
| OS02G0639300 | 3.30803    | 27.17866   | -3.0384  | 4.82E-05 |
| OS02G0642200 | 252.46721  | 122.97757  | 1.0377   | 0.03241  |
| OS02G0642700 | 445.3532   | 217.31371  | 1.0352   | 4.45E-05 |
| OS02G0643000 | 1469.04285 | 628.8004   | 1.2242   | 4.48E-10 |
| OS02G0643500 | 1065.54023 | 754.17494  | 0.49861  | 0.03249  |
| OS02G0644000 | 384.45357  | 603.91179  | -0.65153 | 0.00494  |
| OS02G0644100 | 314.65388  | 451.68674  | -0.52156 | 0.04647  |

---

---

|              |             |            |          |          |
|--------------|-------------|------------|----------|----------|
| OS02G0645100 | 289.91141   | 194.4418   | 0.57627  | 0.03793  |
| OS02G0646200 | 27.52435    | 91.53362   | -1.7336  | 1.69E-06 |
| OS02G0649400 | 313.9256    | 157.45295  | 0.9955   | 4.24E-05 |
| OS02G0649800 | 490.70796   | 193.76962  | 1.3405   | 8.22E-10 |
| OS02G0651300 | 4983.38217  | 3158.81674 | 0.65774  | 0.0011   |
| OS02G0653300 | 12.28989    | 43.06759   | -1.8091  | 0.00059  |
| OS02G0653900 | 2823.33379  | 1848.32798 | 0.61118  | 0.04822  |
| OS02G0654300 | 57.70271    | 11.58376   | 2.3165   | 0.00242  |
| OS02G0654600 | 44.81391    | 13.36372   | 1.7456   | 0.00032  |
| OS02G0658500 | 622.76892   | 409.49495  | 0.60485  | 0.01089  |
| OS02G0662700 | 420.48112   | 193.78633  | 1.1176   | 7.62E-07 |
| OS02G0663100 | 2021.25862  | 1088.06657 | 0.89349  | 4.63E-06 |
| OS02G0664000 | 272.9646    | 127.48627  | 1.0984   | 1.32E-05 |
| OS02G0665250 | 208.73127   | 81.92453   | 1.3493   | 2.50E-07 |
| OS02G0665800 | 17.03639    | 44.8518    | -1.3965  | 0.00672  |
| OS02G0666200 | 21273.03492 | 8837.82414 | 1.2673   | 4.35E-12 |
| OS02G0666250 | 56.3182     | 18.0613    | 1.6407   | 0.00021  |
| OS02G0668400 | 29.62326    | 70.18674   | -1.2445  | 0.00221  |
| OS02G0669000 | 124.98502   | 48.51886   | 1.3651   | 0.00229  |
| OS02G0669100 | 1002.58151  | 537.7845   | 0.89862  | 0.00824  |
| OS02G0670400 | 248.10949   | 132.67345  | 0.9031   | 0.00043  |
| OS02G0670500 | 2242.06086  | 1138.99664 | 0.97706  | 7.20E-05 |
| OS02G0672700 | 271.57521   | 421.44536  | -0.63399 | 0.01099  |
| OS02G0672800 | 557.11609   | 392.62189  | 0.50484  | 0.04981  |
| OS02G0673500 | 146.74552   | 375.94541  | -1.3572  | 0.00074  |
| OS02G0675700 | 68.26085    | 20.94147   | 1.7047   | 4.54E-05 |
| OS02G0675800 | 1663.47553  | 847.11144  | 0.97358  | 0.00055  |

---



---

|              |             |             |          |          |
|--------------|-------------|-------------|----------|----------|
| OS02G0678200 | 6024.65957  | 3382.60607  | 0.83274  | 0.00036  |
| OS02G0678400 | 875.73061   | 611.93141   | 0.51712  | 0.02758  |
| OS02G0680600 | 951.31106   | 504.74549   | 0.91436  | 4.76E-05 |
| OS02G0680700 | 3479.63466  | 2304.42204  | 0.59453  | 0.00476  |
| OS02G0682300 | 18.32827    | 44.99386    | -1.2957  | 0.0143   |
| OS02G0682600 | 34.4951     | 66.32734    | -0.94321 | 0.02696  |
| OS02G0684500 | 16.40105    | 42.0216     | -1.3573  | 0.03878  |
| OS02G0684600 | 15.99641    | 67.0998     | -2.0686  | 9.12E-07 |
| OS02G0685200 | 4945.28677  | 2610.30673  | 0.92183  | 1.64E-06 |
| OS02G0685600 | 64.51557    | 145.51888   | -1.1735  | 0.00011  |
| OS02G0686600 | 40.02354    | 75.15627    | -0.90904 | 0.02923  |
| OS02G0687600 | 63.15984    | 150.01284   | -1.248   | 2.93E-05 |
| OS02G0689200 | 92.33056    | 229.70232   | -1.3149  | 5.12E-07 |
| OS02G0693500 | 5291.71119  | 2311.40793  | 1.195    | 1.80E-10 |
| OS02G0694600 | 11.63828    | 31.51378    | -1.4371  | 0.01773  |
| OS02G0694800 | 296.51114   | 190.74259   | 0.63646  | 0.01976  |
| OS02G0695800 | 75.91334    | 128.03059   | -0.75406 | 0.02025  |
| OS02G0696900 | 131.144     | 49.30895    | 1.4112   | 0.00018  |
| OS02G0697400 | 284.83326   | 32.20393    | 3.1448   | 0.00011  |
| OS02G0697700 | 823.85322   | 580.24421   | 0.50573  | 0.03587  |
| OS02G0698000 | 16165.27206 | 10034.46218 | 0.68793  | 0.00062  |
| OS02G0699600 | 426.58588   | 715.53356   | -0.74618 | 0.00074  |
| OS02G0700400 | 2418.87184  | 1125.83189  | 1.1033   | 5.75E-09 |
| OS02G0700700 | 16.09287    | 4.3259      | 1.8954   | 0.03915  |
| OS02G0701600 | 1190.22761  | 670.76658   | 0.82735  | 6.24E-05 |
| OS02G0702800 | 963.66256   | 671.21399   | 0.52176  | 0.02533  |
| OS02G0704600 | 1939.70573  | 956.9849    | 1.0193   | 1.82E-07 |

---

---

|              |            |            |          |          |
|--------------|------------|------------|----------|----------|
| OS02G0705100 | 9140.12645 | 5744.80291 | 0.66996  | 0.00151  |
| OS02G0705300 | 119.62078  | 63.9259    | 0.904    | 0.02888  |
| OS02G0705400 | 293.32789  | 105.78843  | 1.4713   | 1.67E-09 |
| OS02G0705600 | 570.87167  | 378.27448  | 0.59373  | 0.01321  |
| OS02G0707100 | 1949.98442 | 1268.38566 | 0.62047  | 0.00341  |
| OS02G0709200 | 286.64319  | 179.66774  | 0.67392  | 0.01056  |
| OS02G0709600 | 175.61958  | 70.84408   | 1.3097   | 0.00365  |
| OS02G0712600 | 0          | 13.90158   |          | 0.00012  |
| OS02G0714700 | 13.55671   | 32.54715   | -1.2635  | 0.03498  |
| OS02G0716100 | 108.30333  | 173.0786   | -0.67635 | 0.02971  |
| OS02G0717400 | 921.71086  | 1368.55043 | -0.57026 | 0.00916  |
| OS02G0717800 | 494.69499  | 740.84386  | -0.58263 | 0.0106   |
| OS02G0719100 | 228.57219  | 141.71134  | 0.68969  | 0.01781  |
| OS02G0719600 | 116.14334  | 2.24978    | 5.69     | 1.20E-10 |
| OS02G0720900 | 584.60059  | 192.53539  | 1.6023   | 0.00021  |
| OS02G0723200 | 31.51159   | 64.59894   | -1.0356  | 0.01653  |
| OS02G0723400 | 26.97176   | 69.78021   | -1.3714  | 0.01327  |
| OS02G0725000 | 129.12271  | 43.66716   | 1.5641   | 3.60E-07 |
| OS02G0725100 | 1095.82813 | 747.59059  | 0.5517   | 0.01502  |
| OS02G0728500 | 365.18941  | 172.95838  | 1.0782   | 4.21E-06 |
| OS02G0728700 | 71.51008   | 121.74011  | -0.76759 | 0.02616  |
| OS02G0729300 | 920.47752  | 1269.46787 | -0.46377 | 0.04983  |
| OS02G0730300 | 356.16332  | 570.56774  | -0.67986 | 0.00357  |
| OS02G0734300 | 1793.83816 | 2819.80717 | -0.65255 | 0.00744  |
| OS02G0734400 | 112.37186  | 406.33195  | -1.8544  | 3.93E-11 |
| OS02G0736200 | 180.39244  | 55.30926   | 1.7055   | 0.02001  |
| OS02G0737801 | 4.13006    | 17.52148   | -2.0849  | 0.02402  |

---

---

|              |            |            |          |          |
|--------------|------------|------------|----------|----------|
| OS02G0739600 | 3001.03678 | 1762.36746 | 0.76795  | 0.0001   |
| OS02G0740500 | 47.10828   | 18.70265   | 1.3327   | 0.00566  |
| OS02G0740600 | 149.61493  | 79.70265   | 0.90855  | 0.02716  |
| OS02G0740700 | 180.15683  | 119.29452  | 0.59473  | 0.04733  |
| OS02G0742000 | 6974.09999 | 4598.2009  | 0.60094  | 0.00372  |
| OS02G0742100 | 1900.29633 | 1348.23218 | 0.49516  | 0.03038  |
| OS02G0742700 | 3.15515    | 99.09814   | -4.9731  | 3.41E-25 |
| OS02G0743200 | 55.33447   | 132.09762  | -1.2554  | 7.21E-05 |
| OS02G0744000 | 1718.73129 | 1048.97222 | 0.71237  | 0.00107  |
| OS02G0744682 | 21.26041   | 59.06026   | -1.474   | 0.00079  |
| OS02G0744700 | 1899.60337 | 1266.82312 | 0.58448  | 0.00754  |
| OS02G0744900 | 8354.00438 | 3356.49027 | 1.3155   | 2.21E-05 |
| OS02G0745100 | 198.90628  | 72.816     | 1.4498   | 0.03724  |
| OS02G0749400 | 146.74677  | 220.18847  | -0.58541 | 0.04695  |
| OS02G0750500 | 52.84468   | 96.74312   | -0.8724  | 0.01613  |
| OS02G0753300 | 132.22989  | 27.73511   | 2.2533   | 0.01644  |
| OS02G0753800 | 515.26359  | 225.16197  | 1.1943   | 0.00016  |
| OS02G0754000 | 290.75946  | 423.69939  | -0.54321 | 0.03872  |
| OS02G0754100 | 547.0076   | 379.02281  | 0.52928  | 0.03304  |
| OS02G0754800 | 43.11361   | 93.0495    | -1.1099  | 0.00155  |
| OS02G0755600 | 148.94214  | 64.97363   | 1.1968   | 3.41E-05 |
| OS02G0758800 | 11.08819   | 0.55645    | 4.3166   | 0.00806  |
| OS02G0761700 | 1056.43546 | 692.21969  | 0.6099   | 0.00684  |
| OS02G0764100 | 79.0046    | 37.01888   | 1.0937   | 0.00359  |
| OS02G0766000 | 815.08185  | 499.54295  | 0.70634  | 0.00138  |
| OS02G0766700 | 1324.42705 | 597.66045  | 1.148    | 6.63E-06 |
| OS02G0768600 | 2633.00904 | 1600.72482 | 0.71799  | 0.00052  |

---

---

|              |            |            |          |          |
|--------------|------------|------------|----------|----------|
| OS02G0769800 | 52.06282   | 140.23112  | -1.4295  | 2.85E-05 |
| OS02G0771400 | 11.83753   | 2.15739    | 2.456    | 0.0364   |
| OS02G0775050 | 303.30375  | 170.27519  | 0.8329   | 0.00127  |
| OS02G0778400 | 101.44773  | 159.90524  | -0.65648 | 0.03712  |
| OS02G0778900 | 55.14673   | 4.14475    | 3.7339   | 4.30E-05 |
| OS02G0779000 | 76.93697   | 19.76053   | 1.9611   | 0.04669  |
| OS02G0779200 | 1405.87112 | 925.28253  | 0.6035   | 0.00527  |
| OS02G0779500 | 18.85964   | 40.49051   | -1.1023  | 0.0418   |
| OS02G0780600 | 33.41253   | 66.51196   | -0.99322 | 0.0178   |
| OS02G0782100 | 67.04056   | 144.42307  | -1.1072  | 0.00017  |
| OS02G0782600 | 2731.73618 | 1376.21089 | 0.98912  | 4.46E-07 |
| OS02G0783625 | 27.74236   | 74.32779   | -1.4218  | 0.00034  |
| OS02G0787600 | 178.24468  | 408.52402  | -1.1966  | 2.52E-07 |
| OS02G0788500 | 33.30473   | 61.29167   | -0.87996 | 0.04326  |
| OS02G0789600 | 363.74409  | 240.58152  | 0.5964   | 0.01807  |
| OS02G0792100 | 49.31486   | 112.99159  | -1.1961  | 0.00252  |
| OS02G0793700 | 2798.29852 | 1208.9623  | 1.2108   | 1.62E-10 |
| OS02G0798200 | 2190.85424 | 1387.37871 | 0.65913  | 0.00178  |
| OS02G0802500 | 0.74556    | 15.71338   | -4.3975  | 0.00021  |
| OS02G0802700 | 413.14572  | 240.20637  | 0.78238  | 0.00083  |
| OS02G0803200 | 41.25904   | 86.53421   | -1.0686  | 0.00349  |
| OS02G0804300 | 72.14912   | 120.80812  | -0.74366 | 0.03127  |
| OS02G0805200 | 72.10403   | 125.41867  | -0.7986  | 0.0169   |
| OS02G0805500 | 195.53173  | 100.10731  | 0.96586  | 0.00033  |
| OS02G0805800 | 1145.15835 | 726.2318   | 0.65705  | 0.00868  |
| OS02G0806700 | 3629.19815 | 2122.24821 | 0.77406  | 0.00221  |
| OS02G0807750 | 92.53491   | 169.95957  | -0.87712 | 0.00256  |

---

---

|              |            |            |          |          |
|--------------|------------|------------|----------|----------|
| OS02G0807800 | 8.85402    | 119.6088   | -3.7558  | 2.28E-22 |
| OS02G0809100 | 167.50225  | 332.70353  | -0.99006 | 4.39E-05 |
| OS02G0812400 | 290.59279  | 420.43673  | -0.53289 | 0.03931  |
| OS02G0813350 | 50.01155   | 22.76976   | 1.1351   | 0.01523  |
| OS02G0813800 | 179.69047  | 82.80087   | 1.1178   | 0.02334  |
| OS02G0814000 | 1992.17293 | 887.40154  | 1.1667   | 2.59E-05 |
| OS02G0814300 | 9.97047    | 0.54534    | 4.1924   | 0.00378  |
| OS02G0814400 | 299.97793  | 151.54787  | 0.98508  | 0.00027  |
| OS02G0814700 | 212.83497  | 397.10601  | -0.89979 | 9.84E-05 |
| OS02G0814800 | 564.73447  | 341.98155  | 0.72365  | 0.00665  |
| OS02G0815000 | 203.76154  | 348.57715  | -0.7746  | 0.0015   |
| OS02G0815300 | 1800.56889 | 931.24906  | 0.95121  | 0.04109  |
| OS02G0815700 | 3144.3625  | 1978.14916 | 0.66862  | 0.0012   |
| OS02G0816300 | 44.75999   | 92.67933   | -1.05    | 0.0043   |
| OS02G0816600 | 2989.85866 | 1939.78942 | 0.62418  | 0.00291  |
| OS02G0817600 | 1947.83255 | 1250.69871 | 0.63914  | 0.00206  |
| OS02G0818000 | 1.51744    | 10.07332   | -2.7308  | 0.04093  |
| OS02G0819700 | 67.91263   | 125.70371  | -0.88828 | 0.00752  |
| OS02G0820300 | 80.56712   | 133.19412  | -0.72527 | 0.0304   |
| OS02G0820900 | 672.69415  | 1137.7398  | -0.75815 | 0.00042  |
| OS02G0821400 | 211.50662  | 475.27689  | -1.1681  | 1.76E-07 |
| OS02G0822100 | 379.15688  | 201.37962  | 0.91288  | 0.00013  |
| OS02G0822800 | 112.04488  | 174.12859  | -0.63608 | 0.0343   |
| OS02G0822900 | 8.85024    | 211.82457  | -4.581   | 2.77E-20 |
| OS02G0823300 | 1095.48616 | 651.9374   | 0.74877  | 0.00037  |
| OS02G0823400 | 660.24561  | 394.94621  | 0.74135  | 0.01553  |
| OS02G0823900 | 2495.03231 | 1412.03027 | 0.82129  | 0.00026  |

---

---

|              |             |            |          |          |
|--------------|-------------|------------|----------|----------|
| OS02G0826100 | 18.61153    | 49.48056   | -1.4107  | 0.0031   |
| OS02G0827400 | 1099.61533  | 653.6555   | 0.7504   | 0.00043  |
| OS02G0827500 | 593.84      | 388.41205  | 0.61249  | 0.00912  |
| OS02G0827900 | 330.83187   | 1015.79652 | -1.6184  | 7.28E-16 |
| OS02G0829500 | 691.79746   | 439.39548  | 0.65483  | 0.01342  |
| OS02G0829850 | 11296.73675 | 6906.69402 | 0.70984  | 0.00028  |
| OS02G0831700 | 17.83337    | 38.252     | -1.101   | 0.03963  |
| OS02G0832400 | 864.04974   | 571.71848  | 0.59581  | 0.0103   |
| OS02G0832500 | 1002.09489  | 659.33525  | 0.60394  | 0.00654  |
| OS02G0832600 | 822.51459   | 558.55861  | 0.55833  | 0.01454  |
| OS02G0833200 | 165.53126   | 93.03468   | 0.83126  | 0.00468  |
| OS03G0100100 | 80.32029    | 39.68859   | 1.017    | 0.00612  |
| OS03G0101000 | 68.95393    | 128.22428  | -0.89496 | 0.01129  |
| OS03G0101600 | 1176.57729  | 733.03648  | 0.68264  | 0.00141  |
| OS03G0102000 | 45.59963    | 100.15303  | -1.1351  | 0.00135  |
| OS03G0102100 | 81.5408     | 234.55199  | -1.5243  | 3.50E-09 |
| OS03G0103400 | 265.52562   | 167.94715  | 0.66084  | 0.01491  |
| OS03G0106000 | 1052.38374  | 703.73947  | 0.58055  | 0.00847  |
| OS03G0109500 | 71.11152    | 147.71694  | -1.0547  | 0.00042  |
| OS03G0109600 | 402.12498   | 607.21578  | -0.59457 | 0.0101   |
| OS03G0109800 | 2642.32525  | 1602.80458 | 0.72121  | 0.00036  |
| OS03G0109900 | 1253.41992  | 169.4576   | 2.8869   | 5.71E-08 |
| OS03G0110900 | 64.54061    | 35.26478   | 0.87198  | 0.04039  |
| OS03G0111100 | 260.74502   | 537.40809  | -1.0434  | 2.50E-06 |
| OS03G0111400 | 25.64736    | 8.8402     | 1.5367   | 0.01872  |
| OS03G0111800 | 35.80463    | 109.36924  | -1.611   | 1.00E-06 |
| OS03G0113500 | 57.20153    | 890.26497  | -3.9601  | 0.00156  |

---

---

|              |             |            |          |          |
|--------------|-------------|------------|----------|----------|
| OS03G0114200 | 85.67076    | 138.34448  | -0.69139 | 0.04349  |
| OS03G0114800 | 34.6442     | 78.76656   | -1.185   | 0.00247  |
| OS03G0115100 | 164.0503    | 310.20991  | -0.91911 | 0.00019  |
| OS03G0116000 | 28.31262    | 56.29833   | -0.99165 | 0.03129  |
| OS03G0116300 | 288.49619   | 167.18816  | 0.78708  | 0.01828  |
| OS03G0116700 | 186.46698   | 89.54989   | 1.0582   | 0.00054  |
| OS03G0116800 | 232.03904   | 153.79182  | 0.59339  | 0.03193  |
| OS03G0116900 | 173.16839   | 112.14456  | 0.62682  | 0.04397  |
| OS03G0117100 | 13376.53723 | 9504.31325 | 0.49305  | 0.0221   |
| OS03G0117300 | 138.92904   | 82.3033    | 0.75533  | 0.01678  |
| OS03G0118200 | 315.13109   | 97.51098   | 1.6923   | 7.65E-06 |
| OS03G0118800 | 281.01468   | 141.20163  | 0.99289  | 8.68E-05 |
| OS03G0120200 | 102.94653   | 35.02269   | 1.5555   | 3.99E-06 |
| OS03G0122000 | 157.4518    | 74.16524   | 1.0861   | 0.01028  |
| OS03G0122300 | 203.28494   | 48.42458   | 2.0697   | 0.01237  |
| OS03G0122600 | 844.49306   | 545.61478  | 0.6302   | 0.00471  |
| OS03G0123200 | 29.40275    | 65.14971   | -1.1478  | 0.00539  |
| OS03G0125100 | 127.78447   | 257.92416  | -1.0132  | 9.70E-05 |
| OS03G0125900 | 2009.16368  | 1393.61773 | 0.52776  | 0.01598  |
| OS03G0126000 | 494.66269   | 242.44809  | 1.0288   | 0.00048  |
| OS03G0126600 | 315.85297   | 129.48647  | 1.2865   | 2.28E-07 |
| OS03G0126700 | 586.0595    | 130.5501   | 2.1664   | 0.02046  |
| OS03G0126825 | 801.26906   | 354.01356  | 1.1785   | 7.14E-08 |
| OS03G0127900 | 736.88038   | 429.76525  | 0.77788  | 0.0004   |
| OS03G0127950 | 473.23813   | 247.73257  | 0.93378  | 3.40E-05 |
| OS03G0128100 | 985.00335   | 1974.86205 | -1.0036  | 1.53E-07 |
| OS03G0128200 | 622.73187   | 1294.51376 | -1.0557  | 6.88E-08 |

---

---

|              |             |             |          |          |
|--------------|-------------|-------------|----------|----------|
| OS03G0128800 | 8701.74406  | 5110.96802  | 0.76771  | 5.90E-05 |
| OS03G0129300 | 12879.467   | 6885.30045  | 0.90348  | 0.03145  |
| OS03G0129400 | 26.70738    | 52.14459    | -0.96528 | 0.04912  |
| OS03G0130100 | 68.31987    | 28.13628    | 1.2799   | 0.02446  |
| OS03G0130900 | 542.4463    | 193.3993    | 1.4879   | 3.62E-12 |
| OS03G0131100 | 3120.07028  | 1673.52504  | 0.89869  | 4.37E-06 |
| OS03G0131200 | 58287.05441 | 29654.71412 | 0.97491  | 1.01E-07 |
| OS03G0132000 | 1348.59111  | 921.48433   | 0.54942  | 0.01284  |
| OS03G0132800 | 639.05656   | 434.6624    | 0.55605  | 0.01774  |
| OS03G0133400 | 978.79781   | 222.69591   | 2.1359   | 1.57E-05 |
| OS03G0135400 | 328.32429   | 622.70381   | -0.92342 | 2.91E-05 |
| OS03G0137200 | 262.23843   | 452.20436   | -0.7861  | 0.00231  |
| OS03G0138000 | 212.74721   | 317.36829   | -0.57702 | 0.03724  |
| OS03G0139100 | 788.44713   | 1171.34618  | -0.57108 | 0.0089   |
| OS03G0139200 | 250.03782   | 370.3774    | -0.56685 | 0.03105  |
| OS03G0140200 | 91.30947    | 34.45474    | 1.4061   | 4.43E-05 |
| OS03G0141100 | 11.81749    | 1.64713     | 2.8429   | 0.01268  |
| OS03G0141200 | 13334.25189 | 6468.3141   | 1.0437   | 0.0132   |
| OS03G0142800 | 913.05607   | 569.96982   | 0.67982  | 0.00203  |
| OS03G0142900 | 1045.15849  | 1640.61618  | -0.65052 | 0.00246  |
| OS03G0143851 | 103.78116   | 61.51531    | 0.75453  | 0.04071  |
| OS03G0144150 | 13.58304    | 34.55824    | -1.3472  | 0.02319  |
| OS03G0144200 | 16.23696    | 53.0058     | -1.7069  | 0.00017  |
| OS03G0145600 | 34.84845    | 14.40821    | 1.2742   | 0.01973  |
| OS03G0145800 | 157.94772   | 285.6732    | -0.85492 | 0.00098  |
| OS03G0145900 | 14.49031    | 62.27278    | -2.1035  | 0.00294  |
| OS03G0146000 | 450.81232   | 185.89058   | 1.2781   | 6.32E-09 |

---



---

|              |            |            |          |          |
|--------------|------------|------------|----------|----------|
| OS03G0146100 | 86.60547   | 24.69807   | 1.8101   | 0.02162  |
| OS03G0146200 | 23.86925   | 5.55342    | 2.1037   | 0.01205  |
| OS03G0146500 | 1670.51274 | 1080.23555 | 0.62895  | 0.0031   |
| OS03G0147400 | 1183.31873 | 786.41343  | 0.58948  | 0.00886  |
| OS03G0148700 | 204.93821  | 355.02276  | -0.79272 | 0.03861  |
| OS03G0150600 | 2058.66166 | 3936.44156 | -0.93519 | 1.64E-06 |
| OS03G0151700 | 44.97312   | 134.68233  | -1.5824  | 2.06E-07 |
| OS03G0151900 | 545.99744  | 323.86181  | 0.75352  | 0.00129  |
| OS03G0152600 | 1395.07585 | 770.77909  | 0.85595  | 3.12E-05 |
| OS03G0153100 | 346.14186  | 47.83776   | 2.8551   | 0.00391  |
| OS03G0154000 | 133.40445  | 35.62361   | 1.9049   | 3.21E-05 |
| OS03G0157300 | 52.38238   | 143.38009  | -1.4527  | 8.99E-07 |
| OS03G0157400 | 2877.57906 | 1790.65027 | 0.68437  | 0.00082  |
| OS03G0157900 | 294.12969  | 510.31368  | -0.79493 | 0.00062  |
| OS03G0159800 | 114.49719  | 177.15785  | -0.62972 | 0.03891  |
| OS03G0161500 | 433.04515  | 650.5436   | -0.58713 | 0.01395  |
| OS03G0161800 | 1021.64408 | 649.0083   | 0.65458  | 0.0029   |
| OS03G0161900 | 1495.11659 | 652.78767  | 1.1956   | 4.07E-08 |
| OS03G0163500 | 29.88258   | 63.55619   | -1.0887  | 0.01057  |
| OS03G0164200 | 5.77405    | 18.46979   | -1.6775  | 0.04657  |
| OS03G0164300 | 58.33199   | 118.25751  | -1.0196  | 0.01361  |
| OS03G0169100 | 5842.87344 | 3858.53114 | 0.59863  | 0.00567  |
| OS03G0169600 | 528.92438  | 343.19746  | 0.62402  | 0.00778  |
| OS03G0169900 | 364.72192  | 658.28089  | -0.85191 | 0.00011  |
| OS03G0170500 | 1894.20324 | 1093.61923 | 0.79248  | 0.00286  |
| OS03G0171600 | 1640.47311 | 1140.12398 | 0.52492  | 0.01956  |
| OS03G0171900 | 87.22094   | 149.99621  | -0.78218 | 0.00926  |

---

---

|              |            |            |          |          |
|--------------|------------|------------|----------|----------|
| OS03G0172000 | 126.20183  | 243.90946  | -0.95061 | 0.00113  |
| OS03G0173500 | 99.80636   | 234.90749  | -1.2349  | 1.52E-06 |
| OS03G0174800 | 496.42668  | 302.37021  | 0.71526  | 0.00191  |
| OS03G0174900 | 84.50049   | 205.75463  | -1.2839  | 1.35E-06 |
| OS03G0176700 | 2183.3593  | 1438.76302 | 0.60172  | 0.00546  |
| OS03G0176900 | 62.60219   | 31.97399   | 0.96931  | 0.02547  |
| OS03G0177500 | 1366.39279 | 1917.35887 | -0.48875 | 0.03285  |
| OS03G0177900 | 1923.55173 | 2900.53145 | -0.59254 | 0.00467  |
| OS03G0178000 | 1561.13147 | 2232.04167 | -0.51577 | 0.0257   |
| OS03G0178066 | 197.57902  | 127.21218  | 0.63519  | 0.03015  |
| OS03G0178100 | 1893.08048 | 1039.93519 | 0.86424  | 1.60E-05 |
| OS03G0178400 | 1327.74749 | 645.17407  | 1.0412   | 1.82E-07 |
| OS03G0178500 | 111.4522   | 37.54427   | 1.5698   | 1.58E-06 |
| OS03G0179900 | 1568.75341 | 964.98729  | 0.70104  | 0.00087  |
| OS03G0180100 | 458.37574  | 305.42782  | 0.5857   | 0.01773  |
| OS03G0180300 | 5105.37938 | 2920.27617 | 0.80591  | 4.33E-05 |
| OS03G0182400 | 3290.3523  | 2284.74376 | 0.52621  | 0.01922  |
| OS03G0182700 | 167.52735  | 291.87515  | -0.80095 | 0.00158  |
| OS03G0182800 | 116.34564  | 311.74653  | -1.422   | 6.47E-08 |
| OS03G0183000 | 20.15907   | 129.7128   | -2.6858  | 1.24E-15 |
| OS03G0183100 | 250.85109  | 553.29527  | -1.1412  | 1.81E-07 |
| OS03G0183200 | 1499.07395 | 3922.26285 | -1.3876  | 0.00091  |
| OS03G0183300 | 4622.31468 | 2393.02049 | 0.94978  | 1.81E-05 |
| OS03G0184000 | 970.78533  | 526.80228  | 0.88189  | 2.84E-05 |
| OS03G0185300 | 105.37234  | 191.04152  | -0.85839 | 0.00311  |
| OS03G0185600 | 36.95101   | 72.74024   | -0.97714 | 0.02127  |
| OS03G0187400 | 130.66897  | 65.84294   | 0.98882  | 0.00151  |

---

---

|              |             |            |          |          |
|--------------|-------------|------------|----------|----------|
| OS03G0187525 | 310.95088   | 172.91463  | 0.84663  | 0.00058  |
| OS03G0188100 | 199.30114   | 3.9893     | 5.6427   | 0.03898  |
| OS03G0189300 | 8.77883     | 41.20218   | -2.2306  | 4.57E-05 |
| OS03G0189400 | 847.70041   | 2540.47771 | -1.5835  | 9.28E-11 |
| OS03G0189600 | 2198.38533  | 1076.07729 | 1.0307   | 1.01E-07 |
| OS03G0191200 | 441.2288    | 264.22515  | 0.73976  | 0.00195  |
| OS03G0191400 | 80.56462    | 128.837    | -0.67733 | 0.04492  |
| OS03G0192500 | 5556.92917  | 3880.61642 | 0.518    | 0.01698  |
| OS03G0192700 | 8206.80925  | 2453.97534 | 1.7417   | 2.04E-21 |
| OS03G0194900 | 411.95908   | 1143.07364 | -1.4723  | 3.78E-06 |
| OS03G0195100 | 22.50469    | 5.57739    | 2.0126   | 0.00612  |
| OS03G0195475 | 456.41074   | 189.54155  | 1.2678   | 8.71E-09 |
| OS03G0196600 | 299.05627   | 76.07912   | 1.9748   | 0.0164   |
| OS03G0196900 | 325.0477    | 142.26252  | 1.1921   | 4.17E-07 |
| OS03G0197000 | 2717.08922  | 1172.36119 | 1.2126   | 2.19E-10 |
| OS03G0197050 | 137.98789   | 58.84805   | 1.2295   | 3.63E-05 |
| OS03G0197800 | 105.6418    | 179.58411  | -0.76548 | 0.01315  |
| OS03G0197900 | 0           | 7.6349     |          | 0.00776  |
| OS03G0198300 | 6193.60162  | 4502.08643 | 0.46018  | 0.03926  |
| OS03G0200200 | 18.98858    | 62.16731   | -1.711   | 0.00618  |
| OS03G0200700 | 89.29458    | 142.99509  | -0.67932 | 0.03885  |
| OS03G0202001 | 236.55852   | 64.29812   | 1.8793   | 0.00451  |
| OS03G0202500 | 51.19325    | 88.31867   | -0.78676 | 0.03995  |
| OS03G0203000 | 32.84982    | 66.47862   | -1.017   | 0.01586  |
| OS03G0203200 | 12766.43881 | 9283.80556 | 0.45957  | 0.03023  |
| OS03G0205500 | 62.68616    | 105.08417  | -0.74533 | 0.04587  |
| OS03G0206150 | 9.87023     | 1.45487    | 2.7622   | 0.03316  |

---

---

|              |             |            |          |          |
|--------------|-------------|------------|----------|----------|
| OS03G0206300 | 214.4602    | 112.91535  | 0.92547  | 0.00072  |
| OS03G0207250 | 31.48526    | 65.45999   | -1.0559  | 0.01442  |
| OS03G0207400 | 163.63155   | 250.96693  | -0.61705 | 0.03863  |
| OS03G0208500 | 555.64328   | 780.16818  | -0.48963 | 0.043    |
| OS03G0211700 | 108.63779   | 53.96017   | 1.0096   | 0.00251  |
| OS03G0212400 | 13.94637    | 33.41585   | -1.2606  | 0.03489  |
| OS03G0213100 | 13.68327    | 33.94448   | -1.3108  | 0.03418  |
| OS03G0215000 | 133.42178   | 228.73525  | -0.77768 | 0.00404  |
| OS03G0216700 | 31.8224     | 11.20286   | 1.5062   | 0.00938  |
| OS03G0218400 | 15199.10848 | 5828.86111 | 1.3827   | 0.01669  |
| OS03G0219300 | 1423.74851  | 520.51431  | 1.4517   | 9.61E-12 |
| OS03G0219400 | 259.04853   | 117.00777  | 1.1466   | 2.82E-06 |
| OS03G0219500 | 271.27326   | 171.97523  | 0.65755  | 0.01327  |
| OS03G0219700 | 75.08877    | 134.89461  | -0.84516 | 0.00822  |
| OS03G0220700 | 569.21412   | 896.0655   | -0.65463 | 0.00359  |
| OS03G0223100 | 655.6459    | 144.12501  | 2.1856   | 0.00106  |
| OS03G0223301 | 663.0497    | 1059.98342 | -0.67685 | 0.00191  |
| OS03G0225500 | 37.43479    | 108.11782  | -1.5302  | 2.65E-06 |
| OS03G0225900 | 56.94944    | 454.36467  | -2.9961  | 2.85E-15 |
| OS03G0226300 | 379.3275    | 142.19094  | 1.4156   | 0.03802  |
| OS03G0227700 | 128.54481   | 36.17983   | 1.829    | 0.00955  |
| OS03G0227900 | 116.10853   | 57.82595   | 1.0057   | 0.00193  |
| OS03G0228200 | 16035.0143  | 5342.38924 | 1.5857   | 2.38E-16 |
| OS03G0228400 | 328.11278   | 218.60202  | 0.58589  | 0.02972  |
| OS03G0229500 | 919.14816   | 571.86957  | 0.68461  | 0.00153  |
| OS03G0230500 | 5078.67388  | 2045.66961 | 1.3119   | 2.70E-12 |
| OS03G0231000 | 235.43875   | 97.92785   | 1.2656   | 5.76E-07 |

---

---

|              |            |            |          |          |
|--------------|------------|------------|----------|----------|
| OS03G0231150 | 468.33153  | 207.69076  | 1.1731   | 1.09E-07 |
| OS03G0231400 | 232.79848  | 154.42072  | 0.59222  | 0.0351   |
| OS03G0231600 | 52.37228   | 18.54026   | 1.4981   | 0.00195  |
| OS03G0231800 | 381.84931  | 204.70577  | 0.89945  | 0.02399  |
| OS03G0232400 | 1122.85174 | 262.56751  | 2.0964   | 0.0046   |
| OS03G0232800 | 121.45893  | 45.58609   | 1.4138   | 6.82E-05 |
| OS03G0234500 | 0.74556    | 33.54181   | -5.4915  | 1.15E-08 |
| OS03G0235000 | 2.23667    | 88.3975    | -5.3046  | 6.15E-20 |
| OS03G0237100 | 11.57065   | 28.9423    | -1.3227  | 0.04904  |
| OS03G0238000 | 65.12951   | 114.2955   | -0.81139 | 0.02105  |
| OS03G0238600 | 631.98698  | 219.08256  | 1.5284   | 3.07E-13 |
| OS03G0240500 | 102.82498  | 202.17973  | -0.97545 | 0.00038  |
| OS03G0240800 | 158.43783  | 237.28489  | -0.5827  | 0.04041  |
| OS03G0241200 | 144.17814  | 344.87332  | -1.2582  | 8.07E-08 |
| OS03G0241600 | 1504.68051 | 874.98468  | 0.78213  | 0.00013  |
| OS03G0242200 | 66.92138   | 33.67866   | 0.99063  | 0.02131  |
| OS03G0243100 | 163.08268  | 345.52894  | -1.0832  | 0.00012  |
| OS03G0243350 | 9.32892    | 25.69218   | -1.4615  | 0.04591  |
| OS03G0243600 | 787.81053  | 441.55855  | 0.83524  | 0.0001   |
| OS03G0244700 | 18.54755   | 63.04192   | -1.7651  | 3.70E-05 |
| OS03G0245100 | 54.81448   | 94.74645   | -0.78951 | 0.03283  |
| OS03G0247100 | 416.6429   | 286.76042  | 0.53897  | 0.02957  |
| OS03G0249200 | 710.27001  | 440.23877  | 0.69008  | 0.0033   |
| OS03G0249300 | 79.69013   | 148.51927  | -0.89818 | 0.00314  |
| OS03G0249700 | 2891.74724 | 1421.9139  | 1.0241   | 8.96E-07 |
| OS03G0251350 | 2629.86167 | 1480.50564 | 0.8289   | 0.04045  |
| OS03G0252100 | 1098.83996 | 595.04403  | 0.88491  | 1.62E-05 |

---

---

|              |             |             |          |          |
|--------------|-------------|-------------|----------|----------|
| OS03G0253600 | 30.12691    | 80.23255    | -1.4131  | 0.00017  |
| OS03G0254200 | 3678.58971  | 2216.906    | 0.73061  | 0.01267  |
| OS03G0254250 | 720.70408   | 462.71191   | 0.63929  | 0.01908  |
| OS03G0254900 | 1947.29548  | 1349.37528  | 0.52918  | 0.01472  |
| OS03G0255100 | 236.49059   | 53.83649    | 2.1351   | 0.02398  |
| OS03G0255500 | 8323.53667  | 22102.11686 | -1.4089  | 9.54E-15 |
| OS03G0255900 | 77.38297    | 182.45868   | -1.2375  | 1.19E-05 |
| OS03G0257900 | 8.60718     | 36.09249    | -2.0681  | 0.00032  |
| OS03G0258200 | 530.70945   | 112.05117   | 2.2438   | 1.90E-08 |
| OS03G0261100 | 54.71059    | 17.89875    | 1.612    | 0.00037  |
| OS03G0261900 | 86.98522    | 140.04333   | -0.68703 | 0.03961  |
| OS03G0263800 | 1032.47533  | 734.4353    | 0.4914   | 0.03759  |
| OS03G0263900 | 2632.17854  | 1339.63675  | 0.97442  | 4.80E-07 |
| OS03G0264400 | 253.44833   | 373.31      | -0.55868 | 0.04969  |
| OS03G0265100 | 449.63589   | 276.28505   | 0.7026   | 0.00341  |
| OS03G0266300 | 16.00384    | 53.66016    | -1.7454  | 0.00064  |
| OS03G0266800 | 120.8764    | 55.55189    | 1.1216   | 0.0026   |
| OS03G0267300 | 14062.93667 | 10303.5314  | 0.44876  | 0.04053  |
| OS03G0267700 | 24.90435    | 60.33193    | -1.2765  | 0.00242  |
| OS03G0268600 | 71.43617    | 22.3373     | 1.6772   | 1.27E-05 |
| OS03G0269601 | 20.91456    | 1.78398     | 3.5513   | 1.63E-05 |
| OS03G0269700 | 26.85398    | 6.6255      | 2.019    | 0.00157  |
| OS03G0269900 | 1050.12915  | 524.60818   | 1.0013   | 7.78E-07 |
| OS03G0271200 | 78.55856    | 177.72217   | -1.1778  | 2.12E-05 |
| OS03G0271400 | 16.91867    | 37.40325    | -1.1445  | 0.03619  |
| OS03G0272400 | 180.24693   | 84.41678    | 1.0944   | 9.65E-05 |
| OS03G0272900 | 614.10465   | 327.8334    | 0.90552  | 7.06E-05 |

---

---

|              |             |             |          |          |
|--------------|-------------|-------------|----------|----------|
| OS03G0273800 | 11220.23813 | 4151.73926  | 1.4343   | 2.92E-15 |
| OS03G0274000 | 2075.21011  | 1351.29523  | 0.61891  | 0.00292  |
| OS03G0274300 | 7457.01217  | 4253.36968  | 0.80999  | 3.60E-05 |
| OS03G0277100 | 2261.57814  | 1322.7725   | 0.77376  | 0.00014  |
| OS03G0278900 | 15452.65323 | 10181.69573 | 0.60188  | 0.00541  |
| OS03G0279200 | 39.81059    | 78.70547    | -0.98331 | 0.01381  |
| OS03G0279600 | 15.91872    | 53.48847    | -1.7485  | 9.40E-05 |
| OS03G0279950 | 400.13644   | 207.34365   | 0.94847  | 5.77E-05 |
| OS03G0280400 | 37.36338    | 13.60967    | 1.457    | 0.00978  |
| OS03G0281000 | 3936.94341  | 2291.2378   | 0.78095  | 5.88E-05 |
| OS03G0284400 | 1346.35781  | 961.90046   | 0.4851   | 0.03689  |
| OS03G0284500 | 661.04275   | 426.7245    | 0.63144  | 0.0143   |
| OS03G0284600 | 2849.22296  | 1885.82216  | 0.59537  | 0.00436  |
| OS03G0285100 | 74.26807    | 31.66174    | 1.23     | 0.00193  |
| OS03G0285200 | 39.19274    | 11.31559    | 1.7923   | 0.00057  |
| OS03G0285300 | 57.54865    | 30.19001    | 0.93071  | 0.04634  |
| OS03G0285800 | 164.78052   | 314.07877   | -0.93058 | 0.00024  |
| OS03G0286900 | 15.17817    | 1.80432     | 3.0725   | 0.0046   |
| OS03G0287100 | 987.26203   | 405.15386   | 1.285    | 1.28E-08 |
| OS03G0288300 | 844.27501   | 542.80319   | 0.63728  | 0.00503  |
| OS03G0288400 | 64.97918    | 129.42783   | -0.9941  | 0.01699  |
| OS03G0288800 | 56.20914    | 98.23156    | -0.80538 | 0.02615  |
| OS03G0289800 | 52.60025    | 4.81945     | 3.4481   | 0.02437  |
| OS03G0290300 | 6279.06224  | 3314.73085  | 0.92166  | 1.47E-06 |
| OS03G0291500 | 3.05742     | 69.7887     | -4.5126  | 0.00469  |
| OS03G0292100 | 1883.21031  | 1346.17296  | 0.48433  | 0.03083  |
| OS03G0292200 | 1445.58626  | 808.26742   | 0.83875  | 2.88E-05 |

---

---

|              |            |            |          |          |
|--------------|------------|------------|----------|----------|
| OS03G0292700 | 208.88403  | 89.74066   | 1.2189   | 2.19E-06 |
| OS03G0294700 | 45.41669   | 79.82768   | -0.81367 | 0.03915  |
| OS03G0294800 | 419.82039  | 278.88081  | 0.59012  | 0.0186   |
| OS03G0295800 | 2394.46081 | 1538.60855 | 0.63807  | 0.00215  |
| OS03G0297600 | 326.35923  | 1625.84115 | -2.3167  | 2.42E-32 |
| OS03G0298300 | 759.27172  | 324.01012  | 1.2286   | 2.65E-09 |
| OS03G0298700 | 94.44841   | 46.09619   | 1.0349   | 0.00423  |
| OS03G0305000 | 1069.97825 | 641.46319  | 0.73814  | 0.00043  |
| OS03G0305200 | 36.36716   | 113.84429  | -1.6464  | 8.16E-07 |
| OS03G0305600 | 112.19526  | 31.24592   | 1.8443   | 1.24E-08 |
| OS03G0306900 | 124.76976  | 51.50316   | 1.2765   | 4.25E-05 |
| OS03G0307100 | 916.38938  | 561.729    | 0.70609  | 0.00119  |
| OS03G0308800 | 8742.50321 | 5482.1588  | 0.6733   | 0.00079  |
| OS03G0310600 | 17.09031   | 56.79566   | -1.7326  | 0.00013  |
| OS03G0310701 | 80.27898   | 27.20089   | 1.5614   | 2.09E-05 |
| OS03G0310800 | 4121.06587 | 1937.47443 | 1.0888   | 3.57E-06 |
| OS03G0311300 | 5859.04594 | 3155.18826 | 0.89294  | 4.42E-06 |
| OS03G0313600 | 78.01586   | 208.81461  | -1.4204  | 1.04E-07 |
| OS03G0313800 | 520.05093  | 223.08322  | 1.2211   | 0.0092   |
| OS03G0314700 | 874.97339  | 590.51422  | 0.56727  | 0.01252  |
| OS03G0314800 | 241.44205  | 161.05142  | 0.58416  | 0.03543  |
| OS03G0316200 | 179.76357  | 101.83186  | 0.81991  | 0.02694  |
| OS03G0317300 | 25.314     | 69.65858   | -1.4604  | 0.00035  |
| OS03G0319100 | 1114.7028  | 781.92901  | 0.51155  | 0.02707  |
| OS03G0319400 | 7303.35163 | 3092.93158 | 1.2396   | 0.00522  |
| OS03G0320000 | 135.10352  | 76.35983   | 0.82318  | 0.00927  |
| OS03G0320100 | 28.06316   | 122.22987  | -2.1228  | 5.47E-11 |

---



---

|              |            |            |          |          |
|--------------|------------|------------|----------|----------|
| OS03G0321300 | 205.96804  | 343.33299  | -0.73719 | 0.02439  |
| OS03G0323100 | 90.18419   | 159.87877  | -0.82603 | 0.00845  |
| OS03G0323500 | 213.25489  | 334.68468  | -0.65022 | 0.01649  |
| OS03G0323800 | 127.55505  | 205.53525  | -0.68827 | 0.01576  |
| OS03G0324300 | 998.00255  | 1521.83244 | -0.60869 | 0.00656  |
| OS03G0324600 | 6.16749    | 27.73511   | -2.169   | 0.00137  |
| OS03G0326500 | 2456.9198  | 1462.86077 | 0.74806  | 0.00023  |
| OS03G0327600 | 137.53939  | 36.83253   | 1.9008   | 4.09E-07 |
| OS03G0329700 | 713.49253  | 1056.55579 | -0.5664  | 0.01432  |
| OS03G0330300 | 557.7019   | 328.69669  | 0.76274  | 0.0011   |
| OS03G0332100 | 195.33747  | 48.01111   | 2.0245   | 1.40E-13 |
| OS03G0333100 | 50.59679   | 90.60723   | -0.84058 | 0.02322  |
| OS03G0337500 | 2884.96452 | 1765.06286 | 0.70883  | 0.00069  |
| OS03G0341000 | 2.41337    | 14.33978   | -2.5709  | 0.01187  |
| OS03G0341300 | 418.54332  | 152.44627  | 1.4571   | 0.0147   |
| OS03G0343300 | 36.4711    | 90.6699    | -1.3139  | 0.0002   |
| OS03G0343400 | 444.5377   | 212.2983   | 1.0662   | 0.00746  |
| OS03G0343500 | 248.88376  | 406.00374  | -0.70602 | 0.00318  |
| OS03G0344400 | 0.77188    | 13.8389    | -4.1642  | 0.00088  |
| OS03G0345901 | 441.27788  | 712.6978   | -0.6916  | 0.00246  |
| OS03G0347200 | 96.40815   | 161.80337  | -0.74701 | 0.01336  |
| OS03G0348200 | 9025.21703 | 2019.14137 | 2.1602   | 3.32E-25 |
| OS03G0351300 | 7083.69483 | 3738.78557 | 0.92193  | 8.77E-07 |
| OS03G0351500 | 2261.56632 | 1222.53805 | 0.88744  | 8.87E-06 |
| OS03G0352300 | 67.71836   | 129.44918  | -0.93477 | 0.00282  |
| OS03G0353500 | 135.77266  | 218.47164  | -0.68625 | 0.01552  |
| OS03G0355900 | 782.37601  | 492.80511  | 0.66684  | 0.00358  |

---

---

|              |            |            |          |          |
|--------------|------------|------------|----------|----------|
| OS03G0360700 | 509.82713  | 321.39376  | 0.66567  | 0.00566  |
| OS03G0360800 | 42.19641   | 14.10322   | 1.5811   | 0.00166  |
| OS03G0363100 | 0          | 25.51505   |          | 2.19E-09 |
| OS03G0363200 | 20.96848   | 66.98881   | -1.6757  | 5.54E-05 |
| OS03G0363400 | 35.83456   | 100.02974  | -1.481   | 2.41E-05 |
| OS03G0363700 | 26.0534    | 73.25382   | -1.4914  | 0.00014  |
| OS03G0364700 | 644.77691  | 199.74275  | 1.6907   | 0.00161  |
| OS03G0365000 | 25.15114   | 0          |          | 5.72E-06 |
| OS03G0365200 | 32.6983    | 1.55474    | 4.3945   | 0.00027  |
| OS03G0367101 | 30.40007   | 91.65187   | -1.5921  | 7.46E-06 |
| OS03G0367150 | 19.31943   | 59.2399    | -1.6165  | 0.00018  |
| OS03G0371300 | 24.52335   | 5.485      | 2.1606   | 0.002    |
| OS03G0371350 | 22.53857   | 6.2688     | 1.8461   | 0.01358  |
| OS03G0371400 | 29.53058   | 8.49824    | 1.797    | 0.0036   |
| OS03G0375200 | 2358.60703 | 1239.45614 | 0.92823  | 1.78E-06 |
| OS03G0377700 | 61.21759   | 24.10252   | 1.3448   | 0.001    |
| OS03G0381100 | 7.46064    | 25.12288   | -1.7516  | 0.01169  |
| OS03G0382100 | 8.88412    | 182.34093  | -4.3593  | 1.22E-12 |
| OS03G0385400 | 1020.28632 | 490.45397  | 1.0568   | 1.74E-07 |
| OS03G0386500 | 207.00555  | 106.29506  | 0.96159  | 0.00038  |
| OS03G0387000 | 119.76746  | 197.34365  | -0.72047 | 0.01087  |
| OS03G0388900 | 3310.27296 | 2017.34062 | 0.7145   | 0.00106  |
| OS03G0389100 | 1010.55392 | 288.99401  | 1.806    | 1.20E-19 |
| OS03G0389501 | 102.27246  | 42.33385   | 1.2725   | 0.00012  |
| OS03G0390000 | 436.65663  | 655.13571  | -0.58529 | 0.01126  |
| OS03G0390200 | 744.91854  | 486.79173  | 0.61378  | 0.00731  |
| OS03G0393700 | 51.03404   | 140.39239  | -1.4599  | 1.47E-06 |

---

---

|              |            |            |          |          |
|--------------|------------|------------|----------|----------|
| OS03G0395300 | 171.58332  | 295.90567  | -0.78623 | 0.00201  |
| OS03G0397400 | 83.69846   | 140.67341  | -0.74908 | 0.02267  |
| OS03G0400800 | 15.49141   | 72.45338   | -2.2256  | 3.32E-08 |
| OS03G0401100 | 8136.60994 | 2568.05082 | 1.6638   | 3.05E-10 |
| OS03G0402000 | 39.70284   | 88.92729   | -1.1634  | 0.00141  |
| OS03G0405100 | 320.70729  | 215.90086  | 0.57089  | 0.03591  |
| OS03G0405500 | 278.62794  | 59.24125   | 2.2337   | 1.15E-05 |
| OS03G0405900 | 57.82936   | 27.65021   | 1.0645   | 0.02015  |
| OS03G0406200 | 126.11548  | 201.86521  | -0.67865 | 0.01493  |
| OS03G0411600 | 40.9157    | 97.27876   | -1.2495  | 0.00041  |
| OS03G0411800 | 638.44744  | 1756.36323 | -1.46    | 3.55E-14 |
| OS03G0411900 | 80.07596   | 151.22697  | -0.91727 | 0.00338  |
| OS03G0412400 | 111.81566  | 234.61563  | -1.0692  | 0.00072  |
| OS03G0413100 | 298.88028  | 161.19834  | 0.89073  | 0.00043  |
| OS03G0417700 | 39.61512   | 7.71791    | 2.3598   | 0.00833  |
| OS03G0418700 | 57.45482   | 107.02541  | -0.89745 | 0.0076   |
| OS03G0421000 | 1.91465    | 54.32791   | -4.8265  | 5.26E-08 |
| OS03G0424000 | 48.64949   | 85.52898   | -0.81399 | 0.04055  |
| OS03G0425100 | 41.2666    | 77.12329   | -0.90219 | 0.02285  |
| OS03G0426900 | 1706.91852 | 1136.66351 | 0.58659  | 0.00724  |
| OS03G0428000 | 20.44344   | 52.38282   | -1.3575  | 0.00389  |
| OS03G0431100 | 799.4898   | 1208.88257 | -0.59652 | 0.00682  |
| OS03G0431600 | 4.39944    | 138.40287  | -4.9754  | 2.31E-07 |
| OS03G0432000 | 99.55953   | 42.58531   | 1.2252   | 0.00031  |
| OS03G0432100 | 14.27595   | 119.83286  | -3.0694  | 1.67E-05 |
| OS03G0438100 | 1029.93877 | 575.66683  | 0.83925  | 0.01085  |
| OS03G0438400 | 43.58351   | 76.5908    | -0.81339 | 0.04075  |

---

---

|              |             |             |          |          |
|--------------|-------------|-------------|----------|----------|
| OS03G0439000 | 13.40634    | 2.88751     | 2.215    | 0.02571  |
| OS03G0439700 | 11441.05958 | 7543.19695  | 0.60097  | 0.00316  |
| OS03G0441000 | 319.67083   | 212.73314   | 0.58754  | 0.02832  |
| OS03G0448600 | 56.05876    | 134.63976   | -1.2641  | 4.16E-05 |
| OS03G0452300 | 1156.58133  | 780.2501    | 0.56786  | 0.00886  |
| OS03G0556600 | 12.43899    | 44.66127    | -1.8442  | 0.00037  |
| OS03G0559700 | 583.7907    | 300.89231   | 0.9562   | 1.22E-05 |
| OS03G0563100 | 46.99794    | 18.56809    | 1.3398   | 0.03082  |
| OS03G0565300 | 772.5252    | 439.83502   | 0.81262  | 0.00082  |
| OS03G0565500 | 391.46057   | 564.04794   | -0.52695 | 0.03079  |
| OS03G0565600 | 208.477     | 342.12485   | -0.71463 | 0.0054   |
| OS03G0568500 | 159.81227   | 248.71641   | -0.63812 | 0.0219   |
| OS03G0569900 | 35.93229    | 90.25399    | -1.3287  | 0.00024  |
| OS03G0571800 | 17.11536    | 3.62337     | 2.2399   | 0.00901  |
| OS03G0574600 | 296.66182   | 109.73066   | 1.4349   | 0.03361  |
| OS03G0574900 | 6247.36014  | 2807.5575   | 1.1539   | 1.16E-05 |
| OS03G0578500 | 25.42684    | 6.14496     | 2.0489   | 0.00251  |
| OS03G0579000 | 1891.9351   | 1346.50049  | 0.49065  | 0.02388  |
| OS03G0581200 | 32.62426    | 65.62119    | -1.0082  | 0.01914  |
| OS03G0583800 | 36319.91305 | 20644.71456 | 0.81499  | 1.82E-05 |
| OS03G0586300 | 71.98125    | 126.07121   | -0.80855 | 0.01312  |
| OS03G0586700 | 439.6152    | 209.18865   | 1.0714   | 2.08E-06 |
| OS03G0586800 | 148.10123   | 234.41464   | -0.66248 | 0.01696  |
| OS03G0594900 | 26.22883    | 8.45204     | 1.6338   | 0.02516  |
| OS03G0598200 | 92.51504    | 185.65474   | -1.0049  | 0.00023  |
| OS03G0602300 | 179.91234   | 89.52307    | 1.007    | 0.00882  |
| OS03G0603800 | 242.20748   | 138.2968    | 0.80848  | 0.00184  |

---

---

|              |            |            |          |          |
|--------------|------------|------------|----------|----------|
| OS03G0605300 | 3688.73895 | 1787.20765 | 1.0454   | 4.04E-05 |
| OS03G0607400 | 340.04199  | 117.81268  | 1.5292   | 4.72E-06 |
| OS03G0607500 | 5367.56758 | 3329.72509 | 0.68887  | 0.00059  |
| OS03G0608200 | 27.56456   | 53.8153    | -0.9652  | 0.03617  |
| OS03G0609500 | 112.6789   | 39.51666   | 1.5117   | 3.44E-06 |
| OS03G0609800 | 182.64638  | 485.52534  | -1.4105  | 8.72E-10 |
| OS03G0610400 | 24.59226   | 138.24492  | -2.491   | 8.53E-15 |
| OS03G0610800 | 428.76662  | 185.79765  | 1.2065   | 1.23E-05 |
| OS03G0616400 | 17.04395   | 43.60552   | -1.3553  | 0.00944  |
| OS03G0617900 | 88.12932   | 166.52475  | -0.91804 | 0.00123  |
| OS03G0625300 | 40.89571   | 13.1199    | 1.6402   | 0.00172  |
| OS03G0625900 | 8.48313    | 24.93258   | -1.5554  | 0.02636  |
| OS03G0626700 | 159.1647   | 18.82113   | 3.0801   | 2.10E-10 |
| OS03G0628800 | 482.83883  | 241.18784  | 1.0014   | 1.28E-05 |
| OS03G0633100 | 524.79369  | 342.52286  | 0.61555  | 0.00999  |
| OS03G0633400 | 518.21277  | 353.60935  | 0.55139  | 0.02955  |
| OS03G0633900 | 18.6303    | 47.11042   | -1.3384  | 0.00642  |
| OS03G0637900 | 39.90696   | 11.92572   | 1.7426   | 0.02018  |
| OS03G0639300 | 227.28625  | 152.16021  | 0.57892  | 0.04371  |
| OS03G0643000 | 0.79442    | 11.29509   | -3.8296  | 0.00529  |
| OS03G0645900 | 42.95696   | 7.51106    | 2.5158   | 1.21E-06 |
| OS03G0648600 | 1.49112    | 11.0087    | -2.8842  | 0.02753  |
| OS03G0649000 | 331.47382  | 149.78349  | 1.146    | 0.04756  |
| OS03G0650000 | 117.50689  | 53.60443   | 1.1323   | 0.00885  |
| OS03G0650200 | 622.41402  | 100.97057  | 2.6239   | 1.35E-14 |
| OS03G0655400 | 8879.13304 | 2955.65742 | 1.5869   | 2.55E-17 |
| OS03G0656201 | 9.07581    | 36.84506   | -2.0214  | 0.00027  |

---

---

|              |            |            |          |          |
|--------------|------------|------------|----------|----------|
| OS03G0656500 | 1141.78777 | 817.28491  | 0.48238  | 0.0343   |
| OS03G0657100 | 253.90461  | 399.13312  | -0.65258 | 0.01063  |
| OS03G0660000 | 68.26615   | 185.60618  | -1.443   | 8.99E-05 |
| OS03G0660050 | 116.41064  | 256.01025  | -1.137   | 9.60E-06 |
| OS03G0660500 | 1.44225    | 15.55272   | -3.4308  | 0.00175  |
| OS03G0663400 | 55.23296   | 15.51749   | 1.8316   | 3.55E-05 |
| OS03G0663700 | 76.88692   | 44.49645   | 0.78905  | 0.04925  |
| OS03G0664700 | 178.94137  | 296.35824  | -0.72786 | 0.00688  |
| OS03G0664800 | 88.98135   | 466.63465  | -2.3907  | 6.01E-25 |
| OS03G0665200 | 305.34896  | 99.11153   | 1.6233   | 0.00916  |
| OS03G0667100 | 213.28985  | 35.55669   | 2.5846   | 2.11E-05 |
| OS03G0668500 | 663.40266  | 326.15486  | 1.0243   | 1.48E-06 |
| OS03G0669200 | 273.16033  | 392.11734  | -0.52154 | 0.04605  |
| OS03G0678100 | 89.92369   | 51.80278   | 0.79567  | 0.0444   |
| OS03G0682100 | 1353.22329 | 607.28368  | 1.156    | 0.00834  |
| OS03G0684400 | 8556.21883 | 4269.40936 | 1.0029   | 1.11E-07 |
| OS03G0684700 | 100.26615  | 21.79354   | 2.2019   | 1.91E-10 |
| OS03G0685300 | 1527.82109 | 715.95172  | 1.0935   | 1.68E-08 |
| OS03G0685500 | 913.08198  | 657.50403  | 0.47374  | 0.04633  |
| OS03G0686300 | 1456.48141 | 959.99179  | 0.60139  | 0.00598  |
| OS03G0689688 | 23.49458   | 78.61822   | -1.7425  | 0.00024  |
| OS03G0689866 | 6.5948     | 20.72493   | -1.652   | 0.03609  |
| OS03G0691400 | 512.65892  | 289.15627  | 0.82615  | 0.00018  |
| OS03G0691800 | 57.93838   | 114.1771   | -0.97868 | 0.00396  |
| OS03G0693000 | 761.80896  | 488.05372  | 0.64239  | 0.00362  |
| OS03G0694900 | 338.17219  | 504.72028  | -0.57773 | 0.01689  |
| OS03G0698350 | 167.97971  | 106.02878  | 0.66383  | 0.03238  |

---

---

|              |            |            |          |          |
|--------------|------------|------------|----------|----------|
| OS03G0699300 | 116.04192  | 244.40031  | -1.0746  | 2.95E-05 |
| OS03G0699600 | 1112.70999 | 785.35794  | 0.50266  | 0.03168  |
| OS03G0701200 | 156.14446  | 29.91994   | 2.3837   | 1.81E-08 |
| OS03G0703200 | 1195.36073 | 2044.88086 | -0.77457 | 0.00012  |
| OS03G0703300 | 9947.52217 | 6495.58188 | 0.61488  | 0.00305  |
| OS03G0704100 | 3409.13007 | 2241.47745 | 0.60495  | 0.00413  |
| OS03G0705800 | 1330.95451 | 528.58696  | 1.3322   | 0.00014  |
| OS03G0707200 | 1897.91411 | 956.37811  | 0.98876  | 3.34E-07 |
| OS03G0707250 | 239.4472   | 130.72866  | 0.87313  | 0.00098  |
| OS03G0708500 | 1393.08406 | 877.52166  | 0.66678  | 0.00167  |
| OS03G0709000 | 32.06296   | 70.86947   | -1.1443  | 0.00452  |
| OS03G0709300 | 56.16282   | 21.53112   | 1.3832   | 0.00194  |
| OS03G0710000 | 729.30499  | 1485.68043 | -1.0265  | 2.26E-07 |
| OS03G0710700 | 227.79244  | 113.16878  | 1.0092   | 0.00414  |
| OS03G0711100 | 1895.79045 | 1319.16757 | 0.52317  | 0.01907  |
| OS03G0712400 | 243.24131  | 121.98274  | 0.99571  | 9.11E-05 |
| OS03G0712500 | 187.16871  | 85.93235   | 1.1231   | 2.53E-05 |
| OS03G0712700 | 2382.55866 | 1114.11626 | 1.0966   | 1.23E-08 |
| OS03G0716200 | 4.4784     | 17.37162   | -1.9557  | 0.02191  |
| OS03G0720800 | 42.94435   | 80.0123    | -0.89775 | 0.02628  |
| OS03G0721200 | 486.98914  | 848.55362  | -0.80112 | 0.00014  |
| OS03G0721300 | 114.60493  | 69.39025   | 0.72386  | 0.03621  |
| OS03G0721900 | 5.32042    | 19.44774   | -1.87    | 0.02428  |
| OS03G0722700 | 46.5457    | 126.16723  | -1.4386  | 4.65E-06 |
| OS03G0724100 | 258.33662  | 152.52046  | 0.76025  | 0.00532  |
| OS03G0725200 | 16.49123   | 120.19203  | -2.8656  | 0.00335  |
| OS03G0725300 | 42.51215   | 83.71221   | -0.97756 | 0.00731  |

---

---

|              |             |             |          |          |
|--------------|-------------|-------------|----------|----------|
| OS03G0726500 | 8895.7058   | 2316.11817  | 1.9414   | 0.00896  |
| OS03G0728800 | 84.59822    | 141.4476    | -0.74157 | 0.0202   |
| OS03G0729000 | 600.29783   | 106.76512   | 2.4912   | 8.69E-18 |
| OS03G0729100 | 1343.63861  | 739.77997   | 0.86098  | 2.02E-05 |
| OS03G0729300 | 1030.61716  | 1547.34029  | -0.58628 | 0.01063  |
| OS03G0730000 | 2711.73689  | 1306.05982  | 1.054    | 2.94E-08 |
| OS03G0731100 | 282.30495   | 144.13337   | 0.96985  | 0.00012  |
| OS03G0731900 | 21871.9782  | 14034.47462 | 0.64011  | 0.00135  |
| OS03G0734300 | 72.56153    | 25.74602    | 1.4949   | 0.04269  |
| OS03G0735300 | 152.01955   | 235.84515   | -0.63358 | 0.02559  |
| OS03G0735400 | 48.55431    | 92.4389     | -0.9289  | 0.01199  |
| OS03G0736900 | 464.6928    | 1249.32295  | -1.4268  | 1.33E-11 |
| OS03G0737000 | 522.4011    | 1483.60867  | -1.5059  | 6.13E-07 |
| OS03G0737300 | 21.73531    | 68.73778    | -1.6611  | 5.44E-05 |
| OS03G0737600 | 41.09996    | 76.47997    | -0.89595 | 0.03103  |
| OS03G0738400 | 31890.93104 | 18803.30932 | 0.76216  | 9.37E-05 |
| OS03G0738600 | 13.35497    | 0           |          | 1.19E-05 |
| OS03G0740833 | 83.00317    | 25.05674    | 1.728    | 0.00022  |
| OS03G0741000 | 211.79989   | 65.54023    | 1.6922   | 0.00489  |
| OS03G0741050 | 382.87352   | 128.73837   | 1.5724   | 0.00015  |
| OS03G0741100 | 559.98806   | 189.24844   | 1.5651   | 0.03246  |
| OS03G0743500 | 80.69746    | 181.01509   | -1.1655  | 3.40E-05 |
| OS03G0743900 | 458.08328   | 733.63347   | -0.67945 | 0.00284  |
| OS03G0744700 | 3041.96823  | 1637.34738  | 0.89364  | 0.00024  |
| OS03G0745400 | 2589.58451  | 1756.31928  | 0.56017  | 0.01034  |
| OS03G0746700 | 505.42004   | 219.57697   | 1.2028   | 2.76E-08 |
| OS03G0746800 | 27.21116    | 60.05666    | -1.1421  | 0.00846  |

---



---

|              |             |            |          |          |
|--------------|-------------|------------|----------|----------|
| OS03G0747700 | 94.71906    | 235.5896   | -1.3145  | 2.92E-07 |
| OS03G0747900 | 202.71035   | 85.82854   | 1.2399   | 4.00E-06 |
| OS03G0748000 | 468.59797   | 766.44667  | -0.70983 | 0.00163  |
| OS03G0748600 | 18.47992    | 39.9637    | -1.1127  | 0.04711  |
| OS03G0748900 | 139.47515   | 277.60317  | -0.99302 | 8.47E-05 |
| OS03G0751600 | 947.66655   | 273.98016  | 1.7903   | 5.58E-07 |
| OS03G0756300 | 12.72463    | 125.60723  | -3.3032  | 8.68E-20 |
| OS03G0757000 | 100.03578   | 950.8578   | -3.2487  | 1.87E-51 |
| OS03G0757100 | 74.45856    | 169.76045  | -1.189   | 4.90E-05 |
| OS03G0757200 | 5323.20007  | 1291.92099 | 2.0428   | 1.61E-12 |
| OS03G0757900 | 12.28611    | 31.17198   | -1.3432  | 0.03211  |
| OS03G0759000 | 18.62652    | 75.48538   | -2.0188  | 3.34E-07 |
| OS03G0760100 | 109.86458   | 51.87634   | 1.0826   | 0.00074  |
| OS03G0760700 | 37.48981    | 116.96797  | -1.6415  | 0.00015  |
| OS03G0761200 | 1.98984     | 13.43215   | -2.755   | 0.01245  |
| OS03G0761500 | 42.66236    | 12.96272   | 1.7186   | 0.02122  |
| OS03G0764000 | 251.68185   | 1231.30564 | -2.2905  | 2.13E-30 |
| OS03G0764600 | 1715.62215  | 1056.57554 | 0.69934  | 0.00095  |
| OS03G0765200 | 1429.01035  | 968.27927  | 0.56152  | 0.01081  |
| OS03G0765400 | 8.85529     | 31.58205   | -1.8345  | 0.00178  |
| OS03G0766500 | 31.36499    | 12.25657   | 1.3556   | 0.02338  |
| OS03G0766600 | 12.31243    | 100.23848  | -3.0252  | 4.30E-15 |
| OS03G0766800 | 376.42052   | 890.3573   | -1.242   | 4.14E-06 |
| OS03G0767800 | 1321.54012  | 838.10441  | 0.65702  | 0.0026   |
| OS03G0773600 | 261.61101   | 89.6101    | 1.5457   | 1.13E-05 |
| OS03G0773800 | 15871.57726 | 8987.8527  | 0.8204   | 1.95E-05 |
| OS03G0775000 | 979.06774   | 613.05537  | 0.67539  | 0.0018   |

---

---

|              |            |            |          |          |
|--------------|------------|------------|----------|----------|
| OS03G0775300 | 38.78054   | 89.5275    | -1.207   | 0.00091  |
| OS03G0776400 | 19.9034    | 63.53948   | -1.6746  | 9.84E-05 |
| OS03G0777000 | 214.94249  | 111.90619  | 0.94166  | 0.00201  |
| OS03G0777100 | 39.24666   | 18.40689   | 1.0923   | 0.04511  |
| OS03G0780500 | 28.94533   | 69.67529   | -1.2673  | 0.00171  |
| OS03G0780900 | 20.57127   | 42.4945    | -1.0466  | 0.0494   |
| OS03G0781501 | 165.12756  | 261.13104  | -0.66119 | 0.01359  |
| OS03G0782500 | 1967.99491 | 1084.21011 | 0.86008  | 0.00014  |
| OS03G0786100 | 2078.77531 | 1146.54032 | 0.85845  | 1.72E-05 |
| OS03G0786400 | 3126.39324 | 1464.19813 | 1.0944   | 6.32E-06 |
| OS03G0786500 | 31.11565   | 11.06239   | 1.492    | 0.01558  |
| OS03G0786700 | 13.62435   | 40.10977   | -1.5578  | 0.0035   |
| OS03G0787000 | 139.57036  | 368.32572  | -1.4     | 4.18E-09 |
| OS03G0788200 | 103.72974  | 56.88828   | 0.86663  | 0.01336  |
| OS03G0790700 | 37.64405   | 443.92127  | -3.5598  | 3.60E-45 |
| OS03G0790900 | 8020.39153 | 5399.69197 | 0.5708   | 0.02433  |
| OS03G0792400 | 143.16439  | 284.40966  | -0.9903  | 8.94E-05 |
| OS03G0792600 | 27.93167   | 71.30571   | -1.3521  | 0.00056  |
| OS03G0795000 | 1352.99551 | 958.31943  | 0.49758  | 0.02832  |
| OS03G0796800 | 71.65673   | 157.3854   | -1.1351  | 8.08E-05 |
| OS03G0797300 | 1106.12056 | 54.12169   | 4.3532   | 6.99E-11 |
| OS03G0797400 | 594.93964  | 3.102      | 7.5834   | 5.79E-11 |
| OS03G0797500 | 579.93933  | 0.54534    | 10.055   | 1.73E-07 |
| OS03G0797600 | 1032.83213 | 604.52542  | 0.77273  | 0.00027  |
| OS03G0799000 | 312.5249   | 458.52364  | -0.55302 | 0.03305  |
| OS03G0799100 | 643.96803  | 445.94381  | 0.53013  | 0.03505  |
| OS03G0799900 | 172.63731  | 100.05803  | 0.78691  | 0.00781  |

---

---

|              |            |            |          |          |
|--------------|------------|------------|----------|----------|
| OS03G0800000 | 4072.66402 | 2367.65098 | 0.78252  | 5.58E-05 |
| OS03G0800500 | 565.20273  | 297.96525  | 0.92362  | 2.34E-05 |
| OS03G0800800 | 32.60299   | 104.64399  | -1.6824  | 5.81E-07 |
| OS03G0801800 | 18.45865   | 42.65532   | -1.2084  | 0.0188   |
| OS03G0801900 | 88.28088   | 257.52724  | -1.5446  | 1.52E-09 |
| OS03G0802200 | 86.07044   | 33.22027   | 1.3735   | 0.00022  |
| OS03G0802600 | 1.51744    | 11.58912   | -2.9331  | 0.0196   |
| OS03G0802700 | 45.71617   | 90.94729   | -0.99233 | 0.00477  |
| OS03G0803500 | 7.6586     | 25.88634   | -1.757   | 0.01254  |
| OS03G0804500 | 80.64227   | 442.85687  | -2.4572  | 7.60E-26 |
| OS03G0805500 | 1000.49577 | 619.65114  | 0.69119  | 0.00176  |
| OS03G0806600 | 680.60761  | 1198.29335 | -0.81609 | 0.00868  |
| OS03G0807000 | 9.87401    | 37.00777   | -1.9061  | 0.00061  |
| OS03G0807200 | 55.50489   | 114.57676  | -1.0456  | 0.00142  |
| OS03G0807900 | 7429.98905 | 5451.23779 | 0.44678  | 0.04405  |
| OS03G0810100 | 21.90823   | 4.1114     | 2.4138   | 0.00145  |
| OS03G0810700 | 2.7354     | 17.26449   | -2.658   | 0.00351  |
| OS03G0811100 | 765.68606  | 538.78297  | 0.50705  | 0.04384  |
| OS03G0812200 | 1005.46568 | 1394.27258 | -0.47165 | 0.04257  |
| OS03G0812400 | 11.10946   | 36.87683   | -1.7309  | 0.00228  |
| OS03G0814600 | 4.9984     | 0          |          | 0.03286  |
| OS03G0815700 | 80.01321   | 170.10224  | -1.0881  | 0.0002   |
| OS03G0816100 | 1527.35993 | 860.35844  | 0.82803  | 5.58E-05 |
| OS03G0816800 | 22.19523   | 58.44113   | -1.3967  | 0.00213  |
| OS03G0817800 | 48.67824   | 8.67017    | 2.4891   | 0.00522  |
| OS03G0819600 | 274.24723  | 42.53604   | 2.6887   | 0.00822  |
| OS03G0820500 | 717.9283   | 152.67391  | 2.2334   | 8.57E-13 |

---

---

|              |            |            |          |          |
|--------------|------------|------------|----------|----------|
| OS03G0821100 | 501.96783  | 225.45794  | 1.1547   | 1.21E-07 |
| OS03G0821250 | 902.945    | 593.49555  | 0.6054   | 0.00772  |
| OS03G0821800 | 153.02456  | 230.56195  | -0.59139 | 0.04168  |
| OS03G0823400 | 670.86676  | 154.58704  | 2.1176   | 0.00913  |
| OS03G0823900 | 110.11019  | 66.67695   | 0.72369  | 0.04371  |
| OS03G0824100 | 62.79528   | 122.65468  | -0.96587 | 0.00228  |
| OS03G0824300 | 19.9009    | 47.87986   | -1.2666  | 0.00744  |
| OS03G0824500 | 132.97833  | 202.0577   | -0.60358 | 0.04053  |
| OS03G0825600 | 184.9219   | 118.97525  | 0.63625  | 0.04468  |
| OS03G0826200 | 6237.01477 | 4095.53396 | 0.6068   | 0.00997  |
| OS03G0826700 | 69.09043   | 116.03162  | -0.74796 | 0.0315   |
| OS03G0826800 | 5.44447    | 32.33266   | -2.5701  | 4.37E-05 |
| OS03G0830400 | 14.70832   | 82.59104   | -2.4894  | 2.34E-10 |
| OS03G0831100 | 33.53408   | 70.54572   | -1.0729  | 0.00651  |
| OS03G0833200 | 22.23153   | 48.37877   | -1.1218  | 0.02082  |
| OS03G0833700 | 143.47877  | 297.54218  | -1.0523  | 1.93E-05 |
| OS03G0833800 | 351.6859   | 173.13093  | 1.0224   | 0.00014  |
| OS03G0835100 | 7377.69705 | 5131.9816  | 0.52365  | 0.01585  |
| OS03G0835150 | 1155.10531 | 697.70054  | 0.72734  | 0.00079  |
| OS03G0836200 | 216.65922  | 484.16452  | -1.1601  | 1.29E-07 |
| OS03G0836300 | 140.46652  | 439.71899  | -1.6464  | 2.17E-13 |
| OS03G0836500 | 181.2169   | 287.5386   | -0.66604 | 0.01114  |
| OS03G0837300 | 244.62715  | 137.3946   | 0.83226  | 0.00196  |
| OS03G0838900 | 1522.04639 | 1073.92579 | 0.50312  | 0.02942  |
| OS03G0839200 | 29.70851   | 99.17681   | -1.7391  | 8.13E-05 |
| OS03G0840200 | 114.76524  | 62.24739   | 0.8826   | 0.00818  |
| OS03G0842400 | 6.04343    | 21.69563   | -1.844   | 0.01653  |

---

---

|              |             |            |          |          |
|--------------|-------------|------------|----------|----------|
| OS03G0843400 | 867.03654   | 615.17035  | 0.49511  | 0.03649  |
| OS03G0843800 | 11094.71982 | 4927.46416 | 1.171    | 1.08E-05 |
| OS03G0844900 | 1707.88749  | 1089.20256 | 0.64894  | 0.00245  |
| OS03G0845000 | 1870.25049  | 974.51467  | 0.94048  | 1.78E-06 |
| OS03G0845600 | 25.3742     | 7.85113    | 1.6924   | 0.01163  |
| OS03G0847600 | 797.06008   | 388.10072  | 1.0383   | 9.88E-07 |
| OS03G0847900 | 29.77491    | 8.87528    | 1.7462   | 0.0045   |
| OS03G0848700 | 8.70114     | 130.01952  | -3.9014  | 2.24E-21 |
| OS03G0850200 | 200.3421    | 98.04215   | 1.031    | 0.0001   |
| OS03G0850600 | 1720.96206  | 915.91288  | 0.90993  | 4.52E-06 |
| OS03G0850700 | 1125.10207  | 368.43675  | 1.6106   | 3.37E-12 |
| OS03G0851700 | 232.78104   | 153.58559  | 0.59993  | 0.04056  |
| OS03G0851800 | 359.28866   | 548.17976  | -0.60951 | 0.01266  |
| OS03G0852000 | 114.03089   | 50.08164   | 1.1871   | 0.0002   |
| OS03G0852500 | 38.00743    | 90.18935   | -1.2467  | 0.00042  |
| OS03G0853900 | 44.16986    | 85.79298   | -0.9578  | 0.0102   |
| OS03G0854200 | 7.73001     | 26.10083   | -1.7556  | 0.01119  |
| OS03G0854400 | 23.05228    | 81.41333   | -1.8204  | 2.43E-05 |
| OS03G0855700 | 1310.91413  | 703.73616  | 0.89747  | 1.00E-05 |
| OS03G0856000 | 485.04184   | 823.88747  | -0.76434 | 0.00034  |
| OS03G0856500 | 517.11737   | 6597.02089 | -3.6733  | 3.61E-27 |
| OS03G0857400 | 2272.76787  | 1133.50066 | 1.0037   | 1.66E-05 |
| OS03G0858100 | 276.41219   | 448.02836  | -0.69677 | 0.00316  |
| OS03G0858200 | 80.84411    | 37.0672    | 1.125    | 0.00372  |
| OS03G0862100 | 620.61409   | 428.17244  | 0.5355   | 0.02967  |
| OS04G0102700 | 360.83875   | 536.49146  | -0.5722  | 0.02096  |
| OS04G0104900 | 176.30597   | 49.25196   | 1.8398   | 0.00093  |

---

---

|              |            |            |          |          |
|--------------|------------|------------|----------|----------|
| OS04G0106500 | 60.79661   | 30.45432   | 0.99734  | 0.0221   |
| OS04G0108300 | 664.14875  | 440.74977  | 0.59155  | 0.01031  |
| OS04G0109100 | 1.19542    | 58.37422   | -5.6097  | 2.38E-17 |
| OS04G0110500 | 29.04179   | 59.61459   | -1.0375  | 0.02619  |
| OS04G0111100 | 7.73757    | 30.92225   | -1.9987  | 0.00129  |
| OS04G0111200 | 2194.86765 | 1277.95701 | 0.78029  | 0.00061  |
| OS04G0111500 | 150.90558  | 288.49749  | -0.93491 | 0.00014  |
| OS04G0112300 | 40.06613   | 86.96162   | -1.118   | 0.00257  |
| OS04G0117900 | 321.62593  | 1205.94905 | -1.9067  | 9.62E-10 |
| OS04G0118900 | 73.45853   | 136.08304  | -0.88949 | 0.01417  |
| OS04G0119000 | 7.0371     | 35.8374    | -2.3484  | 7.73E-05 |
| OS04G0119400 | 694.25858  | 1121.1142  | -0.69139 | 0.00152  |
| OS04G0119800 | 162.36219  | 90.26975   | 0.8469   | 0.00448  |
| OS04G0120100 | 245.43911  | 136.37524  | 0.84778  | 0.04136  |
| OS04G0121100 | 372.8481   | 43.59905   | 3.0962   | 0.02888  |
| OS04G0128900 | 9.84769    | 1.45487    | 2.7589   | 0.03323  |
| OS04G0129600 | 30.47916   | 63.25641   | -1.0534  | 0.01347  |
| OS04G0143566 | 24.10865   | 5.44054    | 2.1477   | 0.00292  |
| OS04G0146800 | 48.07941   | 86.48613   | -0.84705 | 0.04933  |
| OS04G0154800 | 18.28445   | 87.12873   | -2.2525  | 1.24E-06 |
| OS04G0165700 | 1468.00445 | 633.77761  | 1.2118   | 5.16E-10 |
| OS04G0167800 | 161.98514  | 96.96124   | 0.74038  | 0.01588  |
| OS04G0167875 | 28.26125   | 6.22623    | 2.1824   | 0.00074  |
| OS04G0167900 | 51.08163   | 13.96826   | 1.8707   | 2.69E-05 |
| OS04G0169100 | 114.65002  | 460.42573  | -2.0057  | 0.00134  |
| OS04G0171800 | 2080.00413 | 531.763    | 1.9677   | 0.03937  |
| OS04G0172400 | 112.03227  | 36.37784   | 1.6228   | 4.75E-06 |

---

---

|              |             |             |         |          |
|--------------|-------------|-------------|---------|----------|
| OS04G0174800 | 30.72094    | 65.88898    | -1.1008 | 0.0098   |
| OS04G0174850 | 18.00752    | 40.90295    | -1.1836 | 0.03069  |
| OS04G0178300 | 128.5161    | 42.26353    | 1.6045  | 2.01E-06 |
| OS04G0178400 | 134.73726   | 48.27022    | 1.4809  | 0.01752  |
| OS04G0182200 | 45.3339     | 8.2709      | 2.4545  | 8.35E-07 |
| OS04G0191500 | 935.10104   | 519.23496   | 0.84873 | 0.00825  |
| OS04G0194500 | 21.59376    | 101.11473   | -2.2273 | 3.70E-10 |
| OS04G0194600 | 28.09954    | 62.45424    | -1.1523 | 0.00623  |
| OS04G0197100 | 415.75601   | 98.72613    | 2.0742  | 6.34E-16 |
| OS04G0197200 | 291.68409   | 75.07049    | 1.9581  | 1.10E-15 |
| OS04G0201500 | 199.09914   | 74.48409    | 1.4185  | 9.02E-08 |
| OS04G0201800 | 1464.55215  | 462.55448   | 1.6628  | 4.64E-18 |
| OS04G0205200 | 133.38938   | 13.43963    | 3.3111  | 2.06E-22 |
| OS04G0208200 | 174.17981   | 42.56845    | 2.0327  | 0.00013  |
| OS04G0208450 | 14.80477    | 39.68638    | -1.4226 | 0.00725  |
| OS04G0209200 | 94.93711    | 44.1213     | 1.1055  | 0.01483  |
| OS04G0209300 | 221.85099   | 482.03941   | -1.1196 | 0.00013  |
| OS04G0219550 | 86.00667    | 38.2539     | 1.1688  | 0.00113  |
| OS04G0219600 | 430.2481    | 223.1532    | 0.94713 | 0.04798  |
| OS04G0220300 | 66.33138    | 32.2402     | 1.0408  | 0.0117   |
| OS04G0220400 | 79.15998    | 40.91997    | 0.95197 | 0.03643  |
| OS04G0223600 | 3.1777      | 14.70224    | -2.21   | 0.02602  |
| OS04G0225001 | 68.14057    | 36.836      | 0.8874  | 0.02881  |
| OS04G0227500 | 322.64861   | 181.11519   | 0.83306 | 0.00382  |
| OS04G0229100 | 125.24684   | 50.18325    | 1.3195  | 0.01214  |
| OS04G0234600 | 25974.33446 | 15944.21518 | 0.70405 | 0.00042  |
| OS04G0244800 | 5278.32223  | 2023.25458  | 1.3834  | 3.88E-14 |

---

---

|              |            |            |          |          |
|--------------|------------|------------|----------|----------|
| OS04G0266900 | 100.06478  | 34.16109   | 1.5505   | 0.02599  |
| OS04G0267250 | 12.85497   | 37.84328   | -1.5577  | 0.007    |
| OS04G0271700 | 31.36626   | 9.61115    | 1.7064   | 0.00406  |
| OS04G0272200 | 36.37599   | 12.15858   | 1.581    | 0.00311  |
| OS04G0272700 | 330.01364  | 179.64213  | 0.8774   | 0.00041  |
| OS04G0276600 | 113.44454  | 57.0137    | 0.99261  | 0.00287  |
| OS04G0282400 | 150.60388  | 52.94328   | 1.5082   | 4.69E-05 |
| OS04G0284900 | 87.59416   | 39.40551   | 1.1524   | 0.00134  |
| OS04G0286300 | 276.83576  | 431.14507  | -0.63914 | 0.00902  |
| OS04G0288500 | 37.41725   | 201.73335  | -2.4307  | 2.65E-13 |
| OS04G0293300 | 22.22032   | 55.72729   | -1.3265  | 0.00301  |
| OS04G0293700 | 42.41187   | 75.35232   | -0.82918 | 0.04802  |
| OS04G0295400 | 472.92639  | 216.6323   | 1.1264   | 5.88E-07 |
| OS04G0300600 | 817.32383  | 173.39367  | 2.2369   | 3.81E-22 |
| OS04G0303250 | 5.79787    | 32.50072   | -2.4869  | 4.76E-05 |
| OS04G0304200 | 6673.52291 | 3467.60506 | 0.94451  | 6.67E-07 |
| OS04G0304250 | 1209.0418  | 604.06981  | 1.0011   | 5.53E-07 |
| OS04G0306800 | 761.74109  | 525.60054  | 0.53533  | 0.02446  |
| OS04G0307500 | 114.67253  | 209.11054  | -0.86675 | 0.00113  |
| OS04G0313900 | 5.5009     | 0          |          | 0.02221  |
| OS04G0316200 | 20.56244   | 49.59511   | -1.2702  | 0.03557  |
| OS04G0321700 | 248.86503  | 128.01875  | 0.95901  | 0.00016  |
| OS04G0337000 | 324.98612  | 188.82011  | 0.78337  | 0.00259  |
| OS04G0338000 | 1654.10023 | 752.3319   | 1.1366   | 7.13E-09 |
| OS04G0338100 | 2973.77039 | 1258.87967 | 1.2402   | 0.02084  |
| OS04G0339800 | 3.25917    | 14.473     | -2.1508  | 0.04186  |
| OS04G0340100 | 3.78044    | 15.33271   | -2.02    | 0.03664  |

---



---

|              |            |            |          |          |
|--------------|------------|------------|----------|----------|
| OS04G0347400 | 9.85019    | 1.41979    | 2.7945   | 0.02723  |
| OS04G0347800 | 110.03372  | 55.36326   | 0.99095  | 0.00283  |
| OS04G0348100 | 22.46338   | 61.99585   | -1.4646  | 0.00068  |
| OS04G0349700 | 366.37485  | 178.0988   | 1.0406   | 1.38E-05 |
| OS04G0365100 | 34.66551   | 79.9482    | -1.2056  | 0.00487  |
| OS04G0366000 | 3.21158    | 28.24522   | -3.1367  | 1.04E-05 |
| OS04G0370900 | 716.98998  | 3418.68833 | -2.2534  | 2.30E-34 |
| OS04G0371000 | 112.51996  | 429.42874  | -1.9322  | 7.51E-18 |
| OS04G0372400 | 198.25096  | 491.43839  | -1.3097  | 2.22E-09 |
| OS04G0372700 | 104.75847  | 37.93606   | 1.4654   | 8.06E-05 |
| OS04G0372750 | 222.10478  | 87.14552   | 1.3497   | 0.00029  |
| OS04G0372775 | 62.97809   | 23.26527   | 1.4367   | 0.00047  |
| OS04G0373000 | 61.29155   | 24.66457   | 1.3132   | 0.00228  |
| OS04G0376000 | 219.32308  | 389.51156  | -0.82861 | 0.00051  |
| OS04G0376500 | 301.89426  | 450.71455  | -0.57817 | 0.02076  |
| OS04G0377600 | 35.69807   | 76.44473   | -1.0986  | 0.00502  |
| OS04G0379300 | 58.92449   | 110.67197  | -0.90935 | 0.00887  |
| OS04G0379600 | 143.40104  | 248.57736  | -0.79364 | 0.00262  |
| OS04G0380200 | 48.70579   | 16.60832   | 1.5522   | 0.02679  |
| OS04G0381000 | 51.65682   | 131.82824  | -1.3516  | 9.63E-06 |
| OS04G0387000 | 51.3336    | 148.22932  | -1.5299  | 4.90E-07 |
| OS04G0389800 | 62.15233   | 11.21571   | 2.4703   | 9.82E-09 |
| OS04G0391500 | 624.15361  | 395.86024  | 0.65691  | 0.00301  |
| OS04G0401700 | 66.79363   | 345.09425  | -2.3692  | 5.70E-22 |
| OS04G0402700 | 582.91919  | 825.25641  | -0.50155 | 0.03621  |
| OS04G0403500 | 2335.34314 | 1129.50717 | 1.0479   | 6.79E-08 |
| OS04G0403600 | 200.17808  | 74.80027   | 1.4202   | 0.00091  |

---

---

|              |             |             |          |          |
|--------------|-------------|-------------|----------|----------|
| OS04G0403701 | 3414.20485  | 2214.53789  | 0.62454  | 0.00261  |
| OS04G0403900 | 5276.51604  | 3120.19435  | 0.75795  | 0.00011  |
| OS04G0404800 | 11341.64224 | 5458.62312  | 1.055    | 1.43E-08 |
| OS04G0405300 | 313.83019   | 167.09824   | 0.90929  | 0.00387  |
| OS04G0405900 | 679.59814   | 1634.01214  | -1.2657  | 2.89E-06 |
| OS04G0409200 | 296.99946   | 114.04883   | 1.3808   | 1.19E-08 |
| OS04G0409900 | 123.28348   | 78.50966    | 0.65104  | 0.04561  |
| OS04G0413900 | 40.64131    | 74.69923    | -0.87815 | 0.03401  |
| OS04G0414700 | 25729.46286 | 15758.52552 | 0.70729  | 0.01051  |
| OS04G0415401 | 23.09359    | 61.36183    | -1.4098  | 0.00081  |
| OS04G0418500 | 197.21071   | 382.70973   | -0.95651 | 7.37E-05 |
| OS04G0419600 | 57.61623    | 21.24836    | 1.4391   | 0.00119  |
| OS04G0419900 | 43.5596     | 169.32925   | -1.9588  | 2.12E-06 |
| OS04G0423100 | 18.23814    | 4.27222     | 2.0939   | 0.01345  |
| OS04G0423400 | 701.35333   | 292.42227   | 1.2621   | 0.00754  |
| OS04G0423600 | 7158.15007  | 2026.47218  | 1.8206   | 2.11E-05 |
| OS04G0428900 | 115.48338   | 187.17999   | -0.69674 | 0.01817  |
| OS04G0430000 | 105.72451   | 59.01233    | 0.84122  | 0.01787  |
| OS04G0430200 | 910.16784   | 288.79608   | 1.6561   | 1.61E-16 |
| OS04G0430600 | 30.46655    | 163.36514   | -2.4228  | 1.54E-15 |
| OS04G0431200 | 2658.07193  | 1913.24347  | 0.47436  | 0.0407   |
| OS04G0432500 | 225.58095   | 328.0936    | -0.54046 | 0.04732  |
| OS04G0433300 | 25.16867    | 9.5778      | 1.3939   | 0.04273  |
| OS04G0433600 | 1702.68807  | 961.7991    | 0.82401  | 5.99E-05 |
| OS04G0434300 | 89.82846    | 154.89109   | -0.78601 | 0.00992  |
| OS04G0434800 | 207.96317   | 120.95971   | 0.7818   | 0.00404  |
| OS04G0435700 | 4840.49863  | 3337.88917  | 0.53622  | 0.01297  |

---

---

|              |             |             |          |          |
|--------------|-------------|-------------|----------|----------|
| OS04G0439100 | 4256.1942   | 2379.723    | 0.83877  | 0.00042  |
| OS04G0439300 | 347.17777   | 135.43024   | 1.3581   | 7.29E-09 |
| OS04G0439400 | 436.72421   | 151.64459   | 1.526    | 9.13E-12 |
| OS04G0442100 | 776.72702   | 509.74533   | 0.60763  | 0.00773  |
| OS04G0442200 | 1997.14756  | 1142.27976  | 0.80602  | 5.80E-05 |
| OS04G0442300 | 466.1287    | 247.98254   | 0.91049  | 0.001    |
| OS04G0442700 | 72.48876    | 26.94383    | 1.4278   | 0.00016  |
| OS04G0444300 | 3.58247     | 126.61493   | -5.1434  | 3.55E-05 |
| OS04G0444800 | 61134.67025 | 22278.57606 | 1.4563   | 6.03E-16 |
| OS04G0445200 | 7782.96114  | 4735.24504  | 0.71688  | 0.00027  |
| OS04G0445300 | 3.13261     | 29.75029    | -3.2475  | 3.82E-06 |
| OS04G0446500 | 42.0046     | 74.97528    | -0.83587 | 0.04122  |
| OS04G0447100 | 978.66341   | 544.02338   | 0.84714  | 0.00059  |
| OS04G0448600 | 3398.20237  | 1358.62005  | 1.3226   | 1.76E-12 |
| OS04G0448900 | 544.11254   | 299.73625   | 0.86021  | 0.00075  |
| OS04G0448950 | 114.19766   | 57.86071    | 0.98088  | 0.00316  |
| OS04G0449450 | 261.43801   | 150.07613   | 0.80077  | 0.00193  |
| OS04G0450100 | 10400.29419 | 4151.86483  | 1.3248   | 3.26E-06 |
| OS04G0450400 | 213.7334    | 325.00659   | -0.60466 | 0.02997  |
| OS04G0450800 | 187.40048   | 286.87729   | -0.61431 | 0.02271  |
| OS04G0451200 | 248.76854   | 4057.10413  | -4.0276  | 1.43E-07 |
| OS04G0451700 | 15.00779    | 2.56778     | 2.5471   | 0.03732  |
| OS04G0452000 | 559.04658   | 813.25364   | -0.54074 | 0.02175  |
| OS04G0452700 | 140.04816   | 857.27766   | -2.6138  | 3.95E-05 |
| OS04G0453200 | 331.31396   | 177.54963   | 0.89998  | 0.0131   |
| OS04G0453500 | 314.30764   | 54.77709    | 2.5205   | 1.85E-13 |
| OS04G0454200 | 59.33156    | 6.08765     | 3.2848   | 0.02573  |

---

---

|              |            |            |          |          |
|--------------|------------|------------|----------|----------|
| OS04G0456700 | 2629.74506 | 1181.74505 | 1.154    | 1.62E-09 |
| OS04G0457400 | 215.54913  | 107.46409  | 1.0042   | 0.00017  |
| OS04G0457800 | 1464.99451 | 2105.24295 | -0.52309 | 0.02095  |
| OS04G0458300 | 24.39807   | 211.70126  | -3.1172  | 2.62E-22 |
| OS04G0459900 | 600.78192  | 416.3916   | 0.5289   | 0.03237  |
| OS04G0460600 | 66.3814    | 121.41077  | -0.87105 | 0.00735  |
| OS04G0462500 | 42.49071   | 104.46048  | -1.2977  | 0.00015  |
| OS04G0462900 | 165.16394  | 263.60991  | -0.67451 | 0.01377  |
| OS04G0463200 | 70.48874   | 164.59344  | -1.2234  | 1.99E-05 |
| OS04G0464200 | 479.6297   | 296.83245  | 0.69227  | 0.0045   |
| OS04G0465500 | 502.98052  | 314.82053  | 0.67597  | 0.00379  |
| OS04G0466600 | 1031.66192 | 576.70769  | 0.83906  | 5.71E-05 |
| OS04G0466700 | 13.60558   | 44.31356   | -1.7035  | 0.00077  |
| OS04G0468000 | 87.52275   | 1059.01467 | -3.5969  | 2.42E-07 |
| OS04G0468600 | 152.24989  | 1862.96425 | -3.6131  | 3.15E-23 |
| OS04G0469300 | 10.6596    | 105.73806  | -3.3103  | 1.85E-17 |
| OS04G0470700 | 133.34154  | 68.61063   | 0.95862  | 0.00256  |
| OS04G0471300 | 499.87898  | 327.37451  | 0.61064  | 0.01108  |
| OS04G0471400 | 2325.10169 | 1381.75025 | 0.7508   | 0.00025  |
| OS04G0474800 | 104.74948  | 312.53316  | -1.5771  | 1.34E-10 |
| OS04G0475200 | 141.40126  | 47.88743   | 1.5621   | 1.31E-07 |
| OS04G0475600 | 560.50945  | 254.81031  | 1.1373   | 7.34E-05 |
| OS04G0476800 | 1382.08942 | 843.54879  | 0.71231  | 0.00087  |
| OS04G0477000 | 76.38825   | 33.48459   | 1.1899   | 0.00174  |
| OS04G0477500 | 622.40069  | 365.09743  | 0.76956  | 0.0005   |
| OS04G0479700 | 8.95553    | 27.01785   | -1.5931  | 0.01698  |
| OS04G0480500 | 143.24327  | 83.69778   | 0.77521  | 0.01735  |

---

---

|              |             |            |          |          |
|--------------|-------------|------------|----------|----------|
| OS04G0480900 | 26.83016    | 5.29636    | 2.3408   | 0.00472  |
| OS04G0481100 | 254.37107   | 98.14983   | 1.3739   | 3.72E-08 |
| OS04G0483450 | 14.95137    | 0          |          | 2.46E-06 |
| OS04G0484900 | 114.32664   | 224.31761  | -0.97238 | 0.00525  |
| OS04G0485400 | 8.78011     | 44.79812   | -2.3511  | 4.95E-06 |
| OS04G0486950 | 6.63989     | 43.00083   | -2.6951  | 0.00982  |
| OS04G0487200 | 867.25065   | 1427.85828 | -0.71933 | 0.00069  |
| OS04G0487300 | 46.79254    | 92.57733   | -0.98438 | 0.00757  |
| OS04G0487400 | 10.93026    | 88.57155   | -3.0185  | 7.59E-14 |
| OS04G0488500 | 9.17732     | 30.54883   | -1.735   | 0.00413  |
| OS04G0488700 | 857.33191   | 433.60155  | 0.98348  | 1.65E-06 |
| OS04G0489600 | 95.26513    | 4727.68837 | -5.633   | 3.99E-20 |
| OS04G0489900 | 16.8898     | 38.96201   | -1.2059  | 0.03291  |
| OS04G0490500 | 488.97919   | 793.17985  | -0.69787 | 0.0024   |
| OS04G0490800 | 13559.67469 | 7877.13535 | 0.78358  | 0.00026  |
| OS04G0490866 | 227.77899   | 125.89999  | 0.85536  | 0.00174  |
| OS04G0491700 | 1782.154    | 826.52067  | 1.1085   | 9.53E-09 |
| OS04G0492300 | 196.61057   | 330.50049  | -0.74931 | 0.00294  |
| OS04G0492500 | 28.06201    | 56.3796    | -1.0066  | 0.0273   |
| OS04G0492600 | 66.38263    | 107.6517   | -0.69749 | 0.048    |
| OS04G0493000 | 10879.14945 | 7301.1196  | 0.57538  | 0.00471  |
| OS04G0493300 | 39.54363    | 85.32387   | -1.1095  | 0.00237  |
| OS04G0495800 | 1584.96363  | 1092.0435  | 0.53742  | 0.01615  |
| OS04G0496000 | 233.85473   | 350.36859  | -0.58326 | 0.03609  |
| OS04G0496150 | 94.09879    | 156.02766  | -0.72955 | 0.02313  |
| OS04G0497600 | 57.35063    | 173.59445  | -1.5978  | 1.90E-08 |
| OS04G0498200 | 181.46854   | 296.7024   | -0.7093  | 0.00647  |

---

---

|              |            |            |          |          |
|--------------|------------|------------|----------|----------|
| OS04G0502900 | 1507.59882 | 1069.25535 | 0.49565  | 0.03204  |
| OS04G0503100 | 70.21948   | 114.85219  | -0.70984 | 0.04263  |
| OS04G0503600 | 210.21963  | 471.71971  | -1.166   | 1.76E-07 |
| OS04G0504000 | 529.09297  | 1730.65829 | -1.7097  | 1.36E-14 |
| OS04G0506900 | 146.88709  | 82.88198   | 0.82558  | 0.00915  |
| OS04G0507100 | 1791.23304 | 1244.83141 | 0.525    | 0.01772  |
| OS04G0508300 | 1222.00095 | 837.69145  | 0.54475  | 0.01745  |
| OS04G0509100 | 610.61735  | 409.69231  | 0.57573  | 0.01861  |
| OS04G0509400 | 342.29263  | 835.60292  | -1.2876  | 3.55E-08 |
| OS04G0510000 | 17.71674   | 0          |          | 0.03494  |
| OS04G0510600 | 211.01159  | 317.8736   | -0.59113 | 0.03741  |
| OS04G0511200 | 35.01772   | 4.81756    | 2.8617   | 0.0249   |
| OS04G0512500 | 131.01855  | 80.16807   | 0.70867  | 0.02404  |
| OS04G0512900 | 41.04481   | 86.2237    | -1.0709  | 0.00358  |
| OS04G0513400 | 1186.63439 | 277.95299  | 2.094    | 1.27E-21 |
| OS04G0515400 | 86.68201   | 43.49083   | 0.99502  | 0.00673  |
| OS04G0517000 | 24.46315   | 4.01153    | 2.6084   | 0.00385  |
| OS04G0518400 | 1370.49659 | 60.5141    | 4.5013   | 3.57E-34 |
| OS04G0520700 | 1168.24455 | 789.59071  | 0.56517  | 0.01015  |
| OS04G0524600 | 52.53399   | 113.38508  | -1.1099  | 0.00857  |
| OS04G0525600 | 68.05422   | 147.47675  | -1.1157  | 0.00018  |
| OS04G0525900 | 601.43816  | 1186.25704 | -0.97993 | 1.64E-06 |
| OS04G0526800 | 732.99001  | 174.92183  | 2.0671   | 0.0037   |
| OS04G0527000 | 211.93436  | 58.46201   | 1.858    | 1.62E-05 |
| OS04G0527400 | 207.05697  | 94.40654   | 1.1331   | 2.59E-05 |
| OS04G0527700 | 30.95029   | 79.13256   | -1.3543  | 0.00034  |
| OS04G0529100 | 9.8051     | 33.71524   | -1.7818  | 0.00344  |

---

---

|              |             |            |          |          |
|--------------|-------------|------------|----------|----------|
| OS04G0530200 | 976.35489   | 696.26397  | 0.48777  | 0.04448  |
| OS04G0531400 | 572.63798   | 322.79684  | 0.827    | 0.00019  |
| OS04G0531900 | 61.13735    | 114.23046  | -0.90182 | 0.01323  |
| OS04G0532400 | 10875.31906 | 5703.8958  | 0.93104  | 0.0116   |
| OS04G0533300 | 4875.29264  | 7058.42054 | -0.53386 | 0.01504  |
| OS04G0534000 | 1511.2161   | 538.39308  | 1.489    | 1.14E-14 |
| OS04G0534166 | 50.23334    | 22.50008   | 1.1587   | 0.02289  |
| OS04G0534200 | 131.85548   | 51.5365    | 1.3553   | 9.18E-06 |
| OS04G0534600 | 1749.6024   | 1221.25811 | 0.51866  | 0.0178   |
| OS04G0537100 | 1707.40796  | 800.24335  | 1.0933   | 1.79E-08 |
| OS04G0537900 | 715.78361   | 357.61244  | 1.0011   | 2.99E-06 |
| OS04G0538100 | 292.71783   | 198.15961  | 0.56285  | 0.03303  |
| OS04G0538166 | 789.55337   | 536.46296  | 0.55756  | 0.01826  |
| OS04G0539000 | 1983.55361  | 1309.53622 | 0.59903  | 0.00538  |
| OS04G0539500 | 88.46883    | 149.11041  | -0.75314 | 0.01736  |
| OS04G0540200 | 144.04105   | 749.76862  | -2.38    | 3.72E-29 |
| OS04G0541700 | 8188.37328  | 3408.86526 | 1.2643   | 8.13E-12 |
| OS04G0542200 | 262.12137   | 122.31092  | 1.0997   | 0.00654  |
| OS04G0542302 | 14.65945    | 1.48995    | 3.2985   | 0.01893  |
| OS04G0542800 | 149.15503   | 627.01939  | -2.0717  | 2.40E-21 |
| OS04G0543500 | 166.87064   | 265.04737  | -0.66752 | 0.0167   |
| OS04G0547900 | 247.56258   | 12.88318   | 4.2642   | 0.03684  |
| OS04G0552700 | 2.28932     | 17.56578   | -2.9398  | 0.00203  |
| OS04G0555000 | 104.76327   | 41.82895   | 1.3246   | 0.00059  |
| OS04G0555300 | 10447.19577 | 6342.41296 | 0.72001  | 0.00026  |
| OS04G0555500 | 214.41762   | 344.80786  | -0.68537 | 0.00632  |
| OS04G0555600 | 205.04748   | 311.51821  | -0.60336 | 0.01932  |

---

---

|              |            |            |          |          |
|--------------|------------|------------|----------|----------|
| OS04G0556500 | 55.04135   | 157.6658   | -1.5183  | 0.00043  |
| OS04G0558400 | 1012.10179 | 493.6855   | 1.0357   | 3.71E-07 |
| OS04G0558700 | 113.28759  | 15.87435   | 2.8352   | 0.00205  |
| OS04G0559400 | 451.03387  | 676.12924  | -0.58406 | 0.01396  |
| OS04G0559700 | 396.02515  | 206.97765  | 0.93612  | 6.57E-05 |
| OS04G0560300 | 25.59849   | 78.21744   | -1.6114  | 3.31E-05 |
| OS04G0562100 | 535.49477  | 207.90587  | 1.3649   | 2.23E-10 |
| OS04G0563300 | 30.02425   | 62.66275   | -1.0615  | 0.01721  |
| OS04G0569100 | 132.97341  | 60.19957   | 1.1433   | 0.00034  |
| OS04G0569300 | 62.95919   | 271.60317  | -2.109   | 1.50E-16 |
| OS04G0572800 | 29.1734    | 9.54272    | 1.6122   | 0.00886  |
| OS04G0573000 | 3792.8626  | 1433.9362  | 1.4033   | 1.54E-07 |
| OS04G0573200 | 262.42443  | 155.71202  | 0.75302  | 0.0059   |
| OS04G0573900 | 152.34158  | 254.61198  | -0.74099 | 0.00639  |
| OS04G0574100 | 60.29155   | 29.37129   | 1.0375   | 0.01348  |
| OS04G0574700 | 1946.46316 | 1196.89378 | 0.70156  | 0.00056  |
| OS04G0578200 | 4057.81821 | 2680.98479 | 0.59794  | 0.00383  |
| OS04G0579200 | 103.39388  | 57.12327   | 0.856    | 0.01627  |
| OS04G0580300 | 845.91397  | 492.09916  | 0.78156  | 0.00019  |
| OS04G0580800 | 39.90696   | 152.67215  | -1.9357  | 1.90E-05 |
| OS04G0581000 | 17.19938   | 62.55601   | -1.8628  | 1.19E-05 |
| OS04G0581800 | 0.42353    | 34.92818   | -6.3658  | 1.48E-11 |
| OS04G0584300 | 65.58315   | 141.51719  | -1.1096  | 0.00024  |
| OS04G0584500 | 12.1846    | 61.58145   | -2.3374  | 2.73E-07 |
| OS04G0585200 | 3801.45246 | 1807.60798 | 1.0725   | 0.01456  |
| OS04G0585300 | 82.8941    | 141.18573  | -0.76825 | 0.01816  |
| OS04G0586500 | 478.39537  | 337.19203  | 0.50463  | 0.04555  |

---



---

|              |            |            |          |          |
|--------------|------------|------------|----------|----------|
| OS04G0587300 | 18.85081   | 44.31333   | -1.2331  | 0.02402  |
| OS04G0587500 | 90.27081   | 387.0591   | -2.1002  | 0.0041   |
| OS04G0590400 | 55.45097   | 164.16881  | -1.5659  | 0.00017  |
| OS04G0591100 | 641.2336   | 423.31367  | 0.59912  | 0.0112   |
| OS04G0592400 | 737.14812  | 485.52737  | 0.6024   | 0.01131  |
| OS04G0592600 | 603.94942  | 380.48235  | 0.6666   | 0.00329  |
| OS04G0592700 | 31.0042    | 89.115     | -1.5232  | 1.90E-05 |
| OS04G0597800 | 0          | 7.74763    |          | 0.0066   |
| OS04G0598200 | 156.97274  | 269.22797  | -0.77831 | 0.00318  |
| OS04G0598800 | 71.94483   | 219.13499  | -1.6069  | 1.50E-09 |
| OS04G0598900 | 64.07955   | 19.64553   | 1.7057   | 2.29E-05 |
| OS04G0599000 | 211.54301  | 353.93194  | -0.74252 | 0.00321  |
| OS04G0600300 | 28.32506   | 8.98816    | 1.656    | 0.03016  |
| OS04G0605300 | 2837.42431 | 1144.6829  | 1.3096   | 5.69E-11 |
| OS04G0605500 | 2521.18547 | 752.50261  | 1.7443   | 1.60E-13 |
| OS04G0605900 | 120.37007  | 204.00084  | -0.7611  | 0.00723  |
| OS04G0606000 | 83.88514   | 11.79613   | 2.8301   | 3.34E-13 |
| OS04G0607000 | 1909.79121 | 1184.14641 | 0.68957  | 0.00098  |
| OS04G0607500 | 207.74595  | 51.10813   | 2.0232   | 0.02947  |
| OS04G0609200 | 100.02054  | 59.98075   | 0.73773  | 0.04151  |
| OS04G0611400 | 298.90669  | 1698.80305 | -2.5068  | 3.52E-38 |
| OS04G0613300 | 974.04531  | 646.20462  | 0.592    | 0.00726  |
| OS04G0613900 | 328.74706  | 98.74885   | 1.7351   | 2.00E-13 |
| OS04G0615000 | 1170.11311 | 549.32056  | 1.0909   | 3.91E-08 |
| OS04G0615500 | 133.52715  | 207.34068  | -0.63487 | 0.03719  |
| OS04G0616500 | 85.57685   | 643.71128  | -2.9111  | 1.18E-38 |
| OS04G0616700 | 1267.10245 | 2667.20558 | -1.0738  | 1.01E-08 |

---

---

|              |            |            |          |          |
|--------------|------------|------------|----------|----------|
| OS04G0617200 | 24.36292   | 51.77079   | -1.0875  | 0.0238   |
| OS04G0617700 | 84.29734   | 186.26803  | -1.1438  | 3.18E-05 |
| OS04G0618050 | 3.18525    | 14.36028   | -2.1726  | 0.03015  |
| OS04G0619000 | 0.79442    | 21.84336   | -4.7811  | 2.59E-06 |
| OS04G0619400 | 80.38537   | 153.026    | -0.92877 | 0.00267  |
| OS04G0620700 | 365.9098   | 608.99969  | -0.73495 | 0.00098  |
| OS04G0620800 | 26.92667   | 52.35696   | -0.95935 | 0.04371  |
| OS04G0621650 | 0.42353    | 7.24848    | -4.0971  | 0.03361  |
| OS04G0623100 | 138.82117  | 212.33923  | -0.61314 | 0.03861  |
| OS04G0624600 | 1884.57514 | 1195.50289 | 0.65662  | 0.00205  |
| OS04G0626000 | 719.17396  | 495.78636  | 0.53662  | 0.02778  |
| OS04G0628000 | 23.82038   | 52.72115   | -1.1462  | 0.01336  |
| OS04G0628200 | 46.79381   | 82.10497   | -0.81115 | 0.03767  |
| OS04G0629100 | 5.94698    | 27.73496   | -2.2215  | 0.00079  |
| OS04G0629500 | 766.15156  | 455.01925  | 0.7517   | 0.00059  |
| OS04G0629600 | 276.87589  | 182.51056  | 0.60126  | 0.03423  |
| OS04G0630000 | 64.52567   | 127.21534  | -0.97933 | 0.00195  |
| OS04G0630100 | 18.92727   | 3.55495    | 2.4126   | 0.00458  |
| OS04G0630400 | 425.68026  | 96.45564   | 2.1418   | 0.00077  |
| OS04G0630800 | 20.22042   | 93.60171   | -2.2107  | 9.85E-10 |
| OS04G0630900 | 12.16961   | 41.03578   | -1.7536  | 0.00128  |
| OS04G0631100 | 1810.79705 | 1202.20827 | 0.59094  | 0.00553  |
| OS04G0632300 | 26.38286   | 60.32862   | -1.1932  | 0.00611  |
| OS04G0632600 | 44.75256   | 13.66713   | 1.7113   | 0.00035  |
| OS04G0632901 | 17.01513   | 4.27222    | 1.9938   | 0.02025  |
| OS04G0633200 | 85.30124   | 35.82313   | 1.2517   | 0.00241  |
| OS04G0633600 | 109.73564  | 65.38289   | 0.74705  | 0.03543  |

---

---

|              |            |            |          |          |
|--------------|------------|------------|----------|----------|
| OS04G0635500 | 94.95957   | 48.45295   | 0.97073  | 0.00663  |
| OS04G0635700 | 180.26692  | 425.62896  | -1.2395  | 4.97E-08 |
| OS04G0635900 | 124.76573  | 210.59852  | -0.75527 | 0.00744  |
| OS04G0636900 | 487.32859  | 692.56066  | -0.50705 | 0.04075  |
| OS04G0638100 | 218.60282  | 94.79833   | 1.2054   | 4.66E-06 |
| OS04G0639200 | 947.81782  | 1543.91477 | -0.70391 | 0.00109  |
| OS04G0640800 | 106.04776  | 168.47136  | -0.66779 | 0.03334  |
| OS04G0640900 | 69.44998   | 19.2204    | 1.8533   | 4.60E-05 |
| OS04G0641000 | 55.18537   | 104.11551  | -0.91583 | 0.00809  |
| OS04G0644600 | 4193.5005  | 2560.52439 | 0.71172  | 0.00035  |
| OS04G0644750 | 47.17969   | 222.31583  | -2.2364  | 1.04E-13 |
| OS04G0644800 | 5.24901    | 18.91139   | -1.8491  | 0.03635  |
| OS04G0647800 | 298.8188   | 532.4546   | -0.83339 | 0.00022  |
| OS04G0647900 | 50.68947   | 155.19852  | -1.6144  | 3.55E-08 |
| OS04G0648200 | 6.86418    | 31.3566    | -2.1916  | 0.00051  |
| OS04G0648400 | 18.01622   | 104.66078  | -2.5384  | 1.40E-12 |
| OS04G0648900 | 1556.84    | 2399.05608 | -0.62385 | 0.0243   |
| OS04G0649900 | 17.60653   | 68.95243   | -1.9695  | 2.20E-06 |
| OS04G0650000 | 1561.29599 | 2317.8328  | -0.57003 | 0.00982  |
| OS04G0650600 | 19.55633   | 67.0015    | -1.7766  | 1.73E-05 |
| OS04G0650800 | 136.3565   | 666.92111  | -2.2901  | 1.01E-26 |
| OS04G0651700 | 86.94646   | 140.53136  | -0.69269 | 0.03261  |
| OS04G0652400 | 1348.91959 | 597.4706   | 1.1749   | 2.60E-09 |
| OS04G0652700 | 129.16389  | 643.44701  | -2.3166  | 3.80E-27 |
| OS04G0652900 | 80.18617   | 128.43268  | -0.67959 | 0.04489  |
| OS04G0653000 | 2034.24489 | 1122.09403 | 0.8583   | 0.00137  |
| OS04G0653400 | 1272.23429 | 639.44919  | 0.99246  | 7.79E-07 |

---

---

|              |             |             |          |          |
|--------------|-------------|-------------|----------|----------|
| OS04G0655100 | 28.03318    | 62.98484    | -1.1679  | 0.00434  |
| OS04G0656100 | 8397.49731  | 17140.80761 | -1.0294  | 3.66E-08 |
| OS04G0656500 | 248.45415   | 121.7062    | 1.0296   | 0.00019  |
| OS04G0657300 | 973.42877   | 626.73287   | 0.63522  | 0.00541  |
| OS04G0657500 | 13319.25499 | 7205.54309  | 0.88633  | 2.92E-06 |
| OS04G0658300 | 764.1281    | 513.37452   | 0.5738   | 0.01429  |
| OS04G0659100 | 19587.05673 | 11183.8335  | 0.80849  | 0.01078  |
| OS04G0661600 | 272.32075   | 497.25551   | -0.86868 | 0.00018  |
| OS04G0662100 | 58.36812    | 100.79682   | -0.7882  | 0.03084  |
| OS04G0662700 | 3127.28913  | 2066.23657  | 0.59791  | 0.00455  |
| OS04G0663300 | 52.76949    | 91.2597     | -0.79027 | 0.03744  |
| OS04G0667100 | 33.24071    | 77.12541    | -1.2143  | 0.00325  |
| OS04G0667700 | 2673.96397  | 1487.53946  | 0.84605  | 1.90E-05 |
| OS04G0667900 | 62.55583    | 106.71791   | -0.77059 | 0.03487  |
| OS04G0668700 | 5718.11193  | 3719.55911  | 0.62041  | 0.00235  |
| OS04G0668800 | 442.47435   | 211.23417   | 1.0668   | 2.84E-06 |
| OS04G0669800 | 520.93296   | 927.48343   | -0.83222 | 0.02885  |
| OS04G0669900 | 219.77688   | 129.50414   | 0.76304  | 0.00445  |
| OS04G0672100 | 204.21924   | 300.32199   | -0.55639 | 0.04942  |
| OS04G0672300 | 38.22539    | 7.93816     | 2.2677   | 3.32E-05 |
| OS04G0673300 | 62.69122    | 153.78313   | -1.2946  | 8.83E-06 |
| OS04G0675000 | 463.04864   | 319.84045   | 0.53381  | 0.03974  |
| OS04G0675500 | 279.41579   | 460.86715   | -0.72194 | 0.00156  |
| OS04G0676100 | 429.341     | 293.28002   | 0.54985  | 0.0315   |
| OS04G0677066 | 60.59609    | 107.81418   | -0.83125 | 0.01873  |
| OS04G0677300 | 47.10713    | 16.80958    | 1.4867   | 0.03035  |
| OS04G0679400 | 21.82676    | 138.10432   | -2.6616  | 0.0019   |

---

---

|              |             |             |          |          |
|--------------|-------------|-------------|----------|----------|
| OS04G0682000 | 539.81487   | 297.45371   | 0.8598   | 0.00014  |
| OS04G0682100 | 173.21981   | 360.30689   | -1.0566  | 5.07E-06 |
| OS04G0683700 | 62939.55324 | 25852.42845 | 1.2837   | 9.62E-06 |
| OS04G0685100 | 88.9363     | 143.78456   | -0.69306 | 0.03362  |
| OS04G0685300 | 743.90582   | 1047.321    | -0.49351 | 0.04871  |
| OS04G0685400 | 35.07024    | 124.03624   | -1.8224  | 2.04E-08 |
| OS04G0685900 | 322.98502   | 197.00777   | 0.71321  | 0.00471  |
| OS04G0686650 | 177.7421    | 267.89678   | -0.59189 | 0.03487  |
| OS04G0687800 | 78.33788    | 19.42567    | 2.0117   | 1.08E-07 |
| OS04G0688100 | 35.70299    | 1914.41841  | -5.7447  | 2.60E-71 |
| OS04G0688300 | 12.5104     | 80.60815    | -2.6878  | 5.59E-10 |
| OS04G0688500 | 2.43842     | 43.43201    | -4.1547  | 2.32E-10 |
| OS04G0688600 | 2.56248     | 38.45531    | -3.9076  | 8.86E-09 |
| OS04G0690800 | 51.15432    | 411.3893    | -3.0076  | 1.26E-34 |
| OS04G0691100 | 1023.9077   | 1578.76618  | -0.62471 | 0.00497  |
| OS04G0691400 | 18.25185    | 58.04171    | -1.669   | 0.00013  |
| OS04G0691900 | 324.81712   | 81.34536    | 1.9975   | 0.00057  |
| OS04G0692600 | 4039.96749  | 2338.77749  | 0.78859  | 6.64E-05 |
| OS04G0693000 | 429.21369   | 624.00391   | -0.53986 | 0.02427  |
| OS04G0693400 | 383.50309   | 137.86378   | 1.476    | 0.00841  |
| OS05G0100100 | 8.3077      | 25.29867    | -1.6065  | 0.01724  |
| OS05G0100800 | 839.16066   | 507.74297   | 0.72485  | 0.01354  |
| OS05G0101200 | 2297.79381  | 1507.15689  | 0.60842  | 0.00366  |
| OS05G0101400 | 1222.73527  | 879.99602   | 0.47454  | 0.0457   |
| OS05G0101600 | 220.82812   | 127.18995   | 0.79594  | 0.00318  |
| OS05G0101800 | 9.85147     | 1.43264     | 2.7817   | 0.0333   |
| OS05G0102000 | 2814.12119  | 27.47876    | 6.6782   | 2.13E-31 |

---

---

|              |             |            |          |          |
|--------------|-------------|------------|----------|----------|
| OS05G0102300 | 225.42952   | 116.51406  | 0.95217  | 0.00042  |
| OS05G0102400 | 104.46269   | 47.43968   | 1.1388   | 0.00061  |
| OS05G0102800 | 955.06652   | 515.51313  | 0.88959  | 2.53E-05 |
| OS05G0103200 | 1585.12824  | 898.63682  | 0.81879  | 0.02886  |
| OS05G0104800 | 85.47649    | 141.18557  | -0.72399 | 0.02617  |
| OS05G0105800 | 2700.7365   | 1857.29007 | 0.54015  | 0.01593  |
| OS05G0106200 | 100.94798   | 167.8681   | -0.73372 | 0.01917  |
| OS05G0107900 | 80.1863     | 30.08863   | 1.4141   | 0.00019  |
| OS05G0108100 | 996.31611   | 663.84527  | 0.58576  | 0.00935  |
| OS05G0110100 | 4131.89564  | 2898.56736 | 0.51146  | 0.02126  |
| OS05G0110800 | 903.70387   | 496.41212  | 0.86431  | 0.00015  |
| OS05G0112800 | 300.16817   | 92.70628   | 1.695    | 4.30E-05 |
| OS05G0113000 | 4427.93965  | 2623.65641 | 0.75506  | 0.00014  |
| OS05G0113300 | 1252.13967  | 776.90508  | 0.68859  | 0.00079  |
| OS05G0113400 | 1191.66858  | 769.90349  | 0.63023  | 0.00382  |
| OS05G0114000 | 32.60426    | 10.0771    | 1.694    | 0.00978  |
| OS05G0114500 | 22.41579    | 49.64334   | -1.1471  | 0.01308  |
| OS05G0115800 | 266.05665   | 462.73866  | -0.79846 | 0.00066  |
| OS05G0116100 | 526.89935   | 222.372    | 1.2446   | 9.52E-09 |
| OS05G0119200 | 496.27918   | 317.02105  | 0.64657  | 0.00567  |
| OS05G0120700 | 209.70436   | 550.17242  | -1.3915  | 2.65E-06 |
| OS05G0121600 | 10077.71355 | 5858.09941 | 0.78266  | 4.54E-05 |
| OS05G0122800 | 2071.08072  | 664.19205  | 1.6407   | 3.29E-18 |
| OS05G0125600 | 35.44117    | 77.68889   | -1.1323  | 0.00318  |
| OS05G0127200 | 226.68966   | 11.33554   | 4.3218   | 2.31E-05 |
| OS05G0127500 | 1121.61839  | 233.23929  | 2.2657   | 8.57E-19 |
| OS05G0128000 | 67.61565    | 26.21931   | 1.3667   | 0.00058  |

---

---

|              |             |             |          |          |
|--------------|-------------|-------------|----------|----------|
| OS05G0128200 | 17193.65116 | 10831.77724 | 0.66661  | 0.03083  |
| OS05G0129800 | 699.74039   | 274.74013   | 1.3488   | 3.20E-06 |
| OS05G0134300 | 69.06916    | 118.6992    | -0.7812  | 0.02266  |
| OS05G0135400 | 0           | 20.32219    |          | 1.61E-07 |
| OS05G0135450 | 0           | 28.63912    |          | 1.47E-10 |
| OS05G0135900 | 796.69395   | 448.48293   | 0.82897  | 0.02758  |
| OS05G0137200 | 2208.519    | 1557.55324  | 0.5038   | 0.0301   |
| OS05G0137300 | 7343.72543  | 4868.67727  | 0.59298  | 0.00405  |
| OS05G0139100 | 251.23722   | 61.38453    | 2.0331   | 2.25E-13 |
| OS05G0140300 | 1236.32065  | 522.85863   | 1.2416   | 4.15E-09 |
| OS05G0141400 | 63.91788    | 116.18093   | -0.86208 | 0.0099   |
| OS05G0142000 | 151.09251   | 15.67656    | 3.2688   | 1.17E-09 |
| OS05G0142200 | 14.3975     | 0.80603     | 4.1588   | 0.00853  |
| OS05G0142400 | 22.05233    | 3.13708     | 2.8134   | 0.01329  |
| OS05G0143300 | 2045.47621  | 1314.51684  | 0.6379   | 0.00527  |
| OS05G0143500 | 1031.98968  | 679.42036   | 0.60305  | 0.00772  |
| OS05G0143800 | 10.32637    | 40.79006    | -1.9819  | 0.00024  |
| OS05G0144000 | 63.26878    | 116.15311   | -0.87646 | 0.0098   |
| OS05G0145300 | 6.7414      | 24.94922    | -1.8879  | 0.00627  |
| OS05G0147200 | 49.59557    | 84.98711    | -0.77703 | 0.04735  |
| OS05G0147400 | 134.57338   | 211.53791   | -0.65252 | 0.01976  |
| OS05G0148600 | 669.04554   | 366.78688   | 0.86716  | 8.32E-05 |
| OS05G0148700 | 5863.98222  | 4042.66723  | 0.53657  | 0.01274  |
| OS05G0149300 | 82.76236    | 368.42035   | -2.1543  | 1.60E-10 |
| OS05G0149500 | 336.36527   | 133.80187   | 1.3299   | 1.81E-05 |
| OS05G0150800 | 1260.37348  | 876.80361   | 0.52353  | 0.0239   |
| OS05G0150900 | 129.32433   | 254.51848   | -0.97678 | 0.00014  |

---

---

|              |             |            |          |          |
|--------------|-------------|------------|----------|----------|
| OS05G0151300 | 4059.13719  | 2645.52383 | 0.61762  | 0.00219  |
| OS05G0151400 | 419.25594   | 599.48093  | -0.51588 | 0.03939  |
| OS05G0154600 | 1706.22712  | 1230.74975 | 0.47127  | 0.03963  |
| OS05G0155200 | 75.51974    | 29.5526    | 1.3536   | 0.00569  |
| OS05G0156500 | 219.27164   | 353.3939   | -0.68856 | 0.03341  |
| OS05G0158400 | 52.00767    | 94.47284   | -0.86118 | 0.02138  |
| OS05G0158500 | 94.07637    | 180.66629  | -0.94142 | 0.00448  |
| OS05G0159300 | 26.52568    | 4.45336    | 2.5744   | 0.0135   |
| OS05G0160200 | 694.01965   | 1013.5725  | -0.5464  | 0.01699  |
| OS05G0160300 | 52.05153    | 20.58091   | 1.3386   | 0.00295  |
| OS05G0161200 | 2148.48476  | 1454.96109 | 0.56234  | 0.00916  |
| OS05G0161500 | 38229.22954 | 4355.59468 | 3.1337   | 2.49E-23 |
| OS05G0165500 | 0.84707     | 13.65413   | -4.0107  | 0.00091  |
| OS05G0166300 | 15.76329    | 119.35734  | -2.9206  | 1.70E-16 |
| OS05G0168700 | 496.89196   | 711.01519  | -0.51695 | 0.02887  |
| OS05G0170800 | 2911.19756  | 1406.31211 | 1.0497   | 4.51E-08 |
| OS05G0170950 | 1768.64897  | 1062.90222 | 0.73464  | 0.00048  |
| OS05G0172100 | 90.05653    | 50.3588    | 0.83859  | 0.0234   |
| OS05G0176700 | 2203.62999  | 1141.13846 | 0.94941  | 1.04E-06 |
| OS05G0178600 | 605.2942    | 885.83923  | -0.54941 | 0.01736  |
| OS05G0181300 | 25.53451    | 71.16304   | -1.4787  | 0.00126  |
| OS05G0181700 | 68.40753    | 244.7169   | -1.8389  | 1.07E-08 |
| OS05G0182800 | 54.73929    | 99.06297   | -0.85577 | 0.01665  |
| OS05G0183100 | 209.11452   | 597.0548   | -1.5136  | 2.38E-08 |
| OS05G0184901 | 11.31876    | 1.91893    | 2.5603   | 0.02571  |
| OS05G0185800 | 2164.3063   | 1379.81189 | 0.64943  | 0.0025   |
| OS05G0186300 | 509.47814   | 171.51634  | 1.5707   | 2.92E-08 |

---



---

|              |            |            |          |          |
|--------------|------------|------------|----------|----------|
| OS05G0188100 | 263.00638  | 589.91988  | -1.1654  | 0.00067  |
| OS05G0188300 | 11.61574   | 37.23874   | -1.6807  | 0.00286  |
| OS05G0191500 | 847.33036  | 57.39468   | 3.8839   | 5.72E-07 |
| OS05G0195101 | 42.91064   | 79.12122   | -0.88273 | 0.02162  |
| OS05G0196100 | 5198.51724 | 3191.49843 | 0.70387  | 0.00165  |
| OS05G0196400 | 68.56173   | 117.72954  | -0.78    | 0.04591  |
| OS05G0198200 | 1022.58626 | 308.38282  | 1.7294   | 4.86E-05 |
| OS05G0198400 | 245.01351  | 441.4933   | -0.84953 | 0.01495  |
| OS05G0200280 | 654.42318  | 367.04781  | 0.83426  | 0.00012  |
| OS05G0201700 | 4.90066    | 121.96366  | -4.6373  | 8.58E-28 |
| OS05G0202600 | 52.0427    | 15.59718   | 1.7384   | 0.00376  |
| OS05G0204600 | 2332.06438 | 1440.957   | 0.69458  | 0.00054  |
| OS05G0205050 | 83.721     | 165.44187  | -0.98266 | 0.00083  |
| OS05G0206800 | 24.93067   | 7.47945    | 1.7369   | 0.02244  |
| OS05G0207400 | 40.54608   | 84.3047    | -1.0561  | 0.00556  |
| OS05G0214300 | 128.52247  | 53.79228   | 1.2565   | 0.00627  |
| OS05G0215000 | 259.81544  | 105.33988  | 1.3024   | 0.0048   |
| OS05G0215300 | 266.84005  | 102.41864  | 1.3815   | 0.00426  |
| OS05G0215700 | 78.70762   | 310.79545  | -1.9814  | 6.42E-16 |
| OS05G0217700 | 223.29225  | 6.43709    | 5.1164   | 0.00157  |
| OS05G0222200 | 1084.84445 | 1595.91263 | -0.55689 | 0.012    |
| OS05G0223000 | 2265.13211 | 1049.1489  | 1.1104   | 3.52E-05 |
| OS05G0227600 | 2571.22448 | 397.03222  | 2.6951   | 0.00352  |
| OS05G0232200 | 1117.08691 | 637.49839  | 0.80925  | 0.00014  |
| OS05G0240200 | 230.8      | 424.14335  | -0.87791 | 0.00011  |
| OS05G0244500 | 573.40775  | 222.57356  | 1.3653   | 2.61E-10 |
| OS05G0253200 | 118.64961  | 216.10701  | -0.86504 | 0.00155  |

---

---

|              |            |            |          |          |
|--------------|------------|------------|----------|----------|
| OS05G0256000 | 169.0022   | 296.4864   | -0.81092 | 0.00137  |
| OS05G0257100 | 148.70774  | 85.19656   | 0.80361  | 0.00982  |
| OS05G0261001 | 1.61517    | 63.82313   | -5.3043  | 0.00171  |
| OS05G0261700 | 20.43966   | 282.56789  | -3.7892  | 0.0002   |
| OS05G0267800 | 317.31031  | 142.91252  | 1.1508   | 8.80E-05 |
| OS05G0268500 | 364.72163  | 236.00249  | 0.62799  | 0.01267  |
| OS05G0270500 | 89.91486   | 0.85222    | 6.7212   | 2.23E-31 |
| OS05G0272800 | 16.8096    | 45.97354   | -1.4515  | 0.0032   |
| OS05G0274900 | 168.83153  | 283.83705  | -0.74948 | 0.00463  |
| OS05G0278500 | 6.7439     | 36.99168   | -2.4555  | 0.01021  |
| OS05G0287800 | 142.66039  | 379.54073  | -1.4117  | 2.75E-09 |
| OS05G0291700 | 6737.65779 | 4081.95976 | 0.72299  | 0.03021  |
| OS05G0296530 | 877.93467  | 507.54038  | 0.79059  | 0.01683  |
| OS05G0296750 | 55.90966   | 28.86087   | 0.95398  | 0.03793  |
| OS05G0301500 | 230.38275  | 419.14478  | -0.86342 | 0.00015  |
| OS05G0304600 | 2047.2142  | 1111.8672  | 0.88068  | 0.00319  |
| OS05G0305900 | 229.74089  | 361.85654  | -0.65541 | 0.01255  |
| OS05G0310500 | 213.67329  | 328.64215  | -0.62111 | 0.01667  |
| OS05G0311500 | 1297.08033 | 434.04051  | 1.5794   | 7.11E-05 |
| OS05G0316400 | 10.64211   | 2.02244    | 2.3956   | 0.04823  |
| OS05G0317900 | 1413.91922 | 424.85079  | 1.7347   | 0.00013  |
| OS05G0318600 | 114.88284  | 214.29267  | -0.89942 | 0.00124  |
| OS05G0318700 | 545.39793  | 1165.4589  | -1.0955  | 8.37E-08 |
| OS05G0320100 | 186.22298  | 117.65456  | 0.66247  | 0.0271   |
| OS05G0320700 | 2607.95229 | 1004.5385  | 1.3764   | 2.75E-13 |
| OS05G0320800 | 160.02277  | 85.85841   | 0.89825  | 0.00272  |
| OS05G0321600 | 105.43509  | 180.40569  | -0.77489 | 0.00877  |

---

---

|              |            |            |          |          |
|--------------|------------|------------|----------|----------|
| OS05G0322900 | 1521.79992 | 257.39604  | 2.5637   | 3.88E-05 |
| OS05G0325200 | 62.8829    | 138.4119   | -1.1382  | 0.0021   |
| OS05G0332300 | 613.69916  | 370.85222  | 0.72669  | 0.03963  |
| OS05G0332801 | 242.94578  | 65.15539   | 1.8987   | 8.31E-14 |
| OS05G0342000 | 94.25405   | 53.40901   | 0.81947  | 0.01899  |
| OS05G0342900 | 83.74733   | 177.91698  | -1.0871  | 0.00561  |
| OS05G0343400 | 2762.93743 | 5377.92282 | -0.96085 | 0.01169  |
| OS05G0345400 | 98.4117    | 186.02603  | -0.9186  | 0.00127  |
| OS05G0345500 | 373.66473  | 708.24966  | -0.92251 | 1.40E-05 |
| OS05G0346300 | 112.55609  | 184.29839  | -0.7114  | 0.0135   |
| OS05G0349000 | 43.54708   | 78.17723   | -0.84417 | 0.03304  |
| OS05G0350500 | 148.54115  | 243.59923  | -0.71365 | 0.00793  |
| OS05G0355400 | 33.36604   | 226.44838  | -2.7627  | 9.46E-06 |
| OS05G0355500 | 226.20981  | 326.48541  | -0.52936 | 0.0486   |
| OS05G0357200 | 1208.99087 | 730.16695  | 0.72751  | 0.00057  |
| OS05G0358000 | 4954.32115 | 3159.98221 | 0.64877  | 0.00158  |
| OS05G0358400 | 390.79766  | 208.91763  | 0.90349  | 0.00013  |
| OS05G0358500 | 2735.9633  | 886.8508   | 1.6253   | 5.43E-05 |
| OS05G0359700 | 5.06981    | 23.75481   | -2.2282  | 0.00748  |
| OS05G0361700 | 0          | 22.56827   |          | 2.69E-05 |
| OS05G0362100 | 24.33294   | 8.97342    | 1.4392   | 0.04005  |
| OS05G0362500 | 397.00298  | 255.97238  | 0.63316  | 0.01467  |
| OS05G0363200 | 1161.41024 | 1879.07358 | -0.69414 | 0.00116  |
| OS05G0364300 | 91.01004   | 185.70275  | -1.0289  | 0.00023  |
| OS05G0365000 | 4099.05576 | 2023.15621 | 1.0187   | 1.14E-07 |
| OS05G0365500 | 43.03214   | 95.69848   | -1.1531  | 0.00091  |
| OS05G0365600 | 5599.44625 | 2234.91162 | 1.3251   | 1.03E-12 |

---

---

|              |            |            |          |          |
|--------------|------------|------------|----------|----------|
| OS05G0366600 | 4961.24187 | 3501.96396 | 0.50254  | 0.01896  |
| OS05G0367100 | 31.34877   | 71.26685   | -1.1848  | 0.00251  |
| OS05G0368000 | 149.83845  | 0.79491    | 7.5584   | 5.43E-11 |
| OS05G0370700 | 2.31186    | 43.94732   | -4.2486  | 9.93E-07 |
| OS05G0373700 | 212.40991  | 353.25149  | -0.73384 | 0.00304  |
| OS05G0380200 | 4.97585    | 49.16045   | -3.3045  | 2.19E-09 |
| OS05G0380300 | 46.2737    | 234.25598  | -2.3398  | 3.98E-10 |
| OS05G0382600 | 513.55388  | 77.15213   | 2.7347   | 0.00011  |
| OS05G0382900 | 425.70701  | 105.11073  | 2.018    | 6.65E-08 |
| OS05G0383200 | 223.76891  | 82.29848   | 1.4431   | 2.40E-08 |
| OS05G0384300 | 7.14982    | 161.83158  | -4.5004  | 3.97E-30 |
| OS05G0384600 | 3.85562    | 19.97811   | -2.3734  | 0.00477  |
| OS05G0387200 | 572.83147  | 370.70421  | 0.62784  | 0.00649  |
| OS05G0388400 | 194.56686  | 113.94509  | 0.77193  | 0.00841  |
| OS05G0388500 | 2491.86614 | 1618.39951 | 0.62266  | 0.03567  |
| OS05G0388600 | 1447.05601 | 929.43882  | 0.63869  | 0.00315  |
| OS05G0389000 | 89.04037   | 46.94022   | 0.92363  | 0.03119  |
| OS05G0389400 | 659.4735   | 333.38334  | 0.98413  | 4.16E-06 |
| OS05G0390100 | 1167.01164 | 693.31226  | 0.75124  | 0.00043  |
| OS05G0390300 | 837.46256  | 155.04739  | 2.4333   | 9.49E-13 |
| OS05G0390800 | 838.74502  | 395.98094  | 1.0828   | 0.0262   |
| OS05G0394900 | 138.46802  | 84.3482    | 0.71512  | 0.03291  |
| OS05G0395000 | 369.70999  | 129.99523  | 1.5079   | 1.16E-06 |
| OS05G0397300 | 2519.62802 | 1754.66269 | 0.52202  | 0.01768  |
| OS05G0398800 | 6.60601    | 229.28785  | -5.1172  | 2.62E-47 |
| OS05G0399100 | 1914.13219 | 1171.35491 | 0.70851  | 0.00074  |
| OS05G0401100 | 2650.79056 | 1403.85984 | 0.91702  | 0.00444  |

---

---

|              |             |             |          |          |
|--------------|-------------|-------------|----------|----------|
| OS05G0403600 | 5.07736     | 26.82006    | -2.4012  | 0.00045  |
| OS05G0404200 | 2037.1187   | 1408.11017  | 0.53277  | 0.01336  |
| OS05G0405000 | 27294.68583 | 10709.96314 | 1.3497   | 9.78E-14 |
| OS05G0406000 | 1956.20404  | 1279.94091  | 0.61198  | 0.00459  |
| OS05G0406100 | 61.79766    | 26.81297    | 1.2046   | 0.01234  |
| OS05G0406150 | 213.41495   | 85.22303    | 1.3243   | 8.16E-07 |
| OS05G0406800 | 28.26375    | 3.55684     | 2.9903   | 6.66E-06 |
| OS05G0408200 | 2206.89635  | 1539.14912  | 0.51989  | 0.01789  |
| OS05G0409500 | 4491.62086  | 2395.35743  | 0.907    | 2.10E-06 |
| OS05G0410200 | 31.88248    | 12.22512    | 1.3829   | 0.01742  |
| OS05G0413400 | 88.86732    | 47.60783    | 0.90045  | 0.01846  |
| OS05G0414200 | 154.31278   | 248.17543   | -0.6855  | 0.01371  |
| OS05G0417100 | 21.13257    | 50.07611    | -1.2447  | 0.00937  |
| OS05G0417200 | 85.78871    | 156.18909   | -0.86443 | 0.00438  |
| OS05G0417300 | 24.30912    | 60.74421    | -1.3212  | 0.00302  |
| OS05G0417600 | 31.57179    | 201.21946   | -2.6721  | 1.11E-16 |
| OS05G0417900 | 0           | 7.80857     |          | 0.00727  |
| OS05G0419000 | 3165.07339  | 2170.69553  | 0.54408  | 0.00916  |
| OS05G0419200 | 6003.8707   | 4150.90297  | 0.53247  | 0.01448  |
| OS05G0420000 | 53.00011    | 129.79361   | -1.2922  | 0.00263  |
| OS05G0420200 | 480.11131   | 317.67448   | 0.59582  | 0.01477  |
| OS05G0421900 | 469.74917   | 1723.1964   | -1.8751  | 1.64E-06 |
| OS05G0425700 | 1374.91153  | 946.87551   | 0.53809  | 0.01716  |
| OS05G0426200 | 1341.44731  | 2673.79997  | -0.9951  | 2.43E-07 |
| OS05G0427100 | 578.2071    | 1127.06257  | -0.96291 | 2.97E-06 |
| OS05G0428700 | 2037.18253  | 691.60734   | 1.5586   | 2.51E-16 |
| OS05G0429400 | 305.52267   | 785.05337   | -1.3615  | 1.91E-05 |

---

---

|              |            |            |          |          |
|--------------|------------|------------|----------|----------|
| OS05G0429900 | 15.425     | 68.38447   | -2.1484  | 5.70E-07 |
| OS05G0430300 | 345.00882  | 726.15503  | -1.0736  | 2.73E-07 |
| OS05G0430800 | 40.48593   | 175.79671  | -2.1184  | 1.63E-07 |
| OS05G0432700 | 1549.86093 | 1026.2882  | 0.5947   | 0.00597  |
| OS05G0437401 | 8.25884    | 34.13674   | -2.0473  | 0.00054  |
| OS05G0439400 | 814.15495  | 1277.96708 | -0.65048 | 0.00382  |
| OS05G0440466 | 18.88341   | 6.06905    | 1.6376   | 0.04303  |
| OS05G0444200 | 131.17121  | 44.0107    | 1.5755   | 0.02028  |
| OS05G0448700 | 102.52172  | 162.92558  | -0.66828 | 0.03581  |
| OS05G0451100 | 100.15343  | 179.16901  | -0.83911 | 0.00423  |
| OS05G0451300 | 12.14079   | 315.75166  | -4.7009  | 3.57E-34 |
| OS05G0452800 | 52.82706   | 11.69452   | 2.1754   | 0.04173  |
| OS05G0452900 | 437.77413  | 745.76717  | -0.76854 | 0.00048  |
| OS05G0459600 | 91.9373    | 40.61309   | 1.1787   | 0.00087  |
| OS05G0459900 | 862.40052  | 1209.65384 | -0.48816 | 0.03345  |
| OS05G0460000 | 1070.96296 | 703.18191  | 0.60694  | 0.00541  |
| OS05G0460600 | 259.02703  | 163.40311  | 0.66467  | 0.03538  |
| OS05G0461600 | 222.7127   | 96.97448   | 1.1995   | 0.00037  |
| OS05G0463300 | 43.91547   | 15.77833   | 1.4768   | 0.0031   |
| OS05G0464350 | 22.18772   | 5.78439    | 1.9395   | 0.00863  |
| OS05G0466600 | 169.41941  | 255.80536  | -0.59445 | 0.03798  |
| OS05G0468900 | 99.23871   | 311.4391   | -1.65    | 2.73E-07 |
| OS05G0473401 | 41.0108    | 4.61244    | 3.1524   | 0.03291  |
| OS05G0473500 | 839.2059   | 1434.32112 | -0.77327 | 0.00028  |
| OS05G0475300 | 294.83067  | 601.10712  | -1.0277  | 2.82E-06 |
| OS05G0475700 | 2069.99207 | 553.49042  | 1.903    | 0.00853  |
| OS05G0477300 | 732.22119  | 1215.83981 | -0.7316  | 0.00064  |

---

---

|              |            |            |          |          |
|--------------|------------|------------|----------|----------|
| OS05G0477900 | 477.8173   | 97.81157   | 2.2884   | 1.77E-05 |
| OS05G0479025 | 76.10871   | 10.40606   | 2.8706   | 1.54E-09 |
| OS05G0479475 | 17.85842   | 40.78794   | -1.1915  | 0.029    |
| OS05G0479900 | 89.57139   | 160.02372  | -0.83718 | 0.00567  |
| OS05G0480000 | 3944.43774 | 2112.90987 | 0.90059  | 1.80E-06 |
| OS05G0480500 | 57.80431   | 111.11586  | -0.94282 | 0.00467  |
| OS05G0481100 | 370.4197   | 1167.33889 | -1.656   | 2.37E-16 |
| OS05G0482400 | 459.00599  | 196.29214  | 1.2255   | 1.79E-07 |
| OS05G0486100 | 33.13682   | 152.24024  | -2.1998  | 1.09E-12 |
| OS05G0486200 | 133.79034  | 228.03652  | -0.76929 | 0.00374  |
| OS05G0488600 | 359.19222  | 130.03953  | 1.4658   | 3.86E-10 |
| OS05G0489100 | 40.92818   | 106.66083  | -1.3819  | 3.80E-05 |
| OS05G0489200 | 1316.45061 | 654.53951  | 1.0081   | 0.00786  |
| OS05G0490000 | 70.31594   | 148.71523  | -1.0806  | 0.00032  |
| OS05G0490500 | 55.84457   | 25.36134   | 1.1388   | 0.01347  |
| OS05G0491000 | 37.08767   | 99.4676    | -1.4233  | 3.36E-05 |
| OS05G0493166 | 85.70333   | 19.66791   | 2.1235   | 1.31E-08 |
| OS05G0494500 | 437.00356  | 919.81279  | -1.0737  | 1.82E-07 |
| OS05G0495900 | 724.14558  | 221.50551  | 1.7089   | 4.34E-11 |
| OS05G0496000 | 48.75984   | 84.71161   | -0.79687 | 0.04636  |
| OS05G0496100 | 71.68793   | 26.27678   | 1.4479   | 0.00303  |
| OS05G0497200 | 167.89954  | 43.46182   | 1.9498   | 4.25E-08 |
| OS05G0497675 | 102.12956  | 44.74618   | 1.1906   | 0.00042  |
| OS05G0498900 | 944.17115  | 585.39191  | 0.68965  | 0.00169  |
| OS05G0499600 | 11.51045   | 33.53236   | -1.5426  | 0.0105   |
| OS05G0502500 | 1402.16525 | 866.77412  | 0.69393  | 0.00091  |
| OS05G0502800 | 33.71456   | 68.14262   | -1.0152  | 0.01013  |

---

---

|              |            |            |          |          |
|--------------|------------|------------|----------|----------|
| OS05G0508400 | 689.83268  | 203.86207  | 1.7587   | 0.0029   |
| OS05G0508500 | 1172.36864 | 836.39615  | 0.48717  | 0.04359  |
| OS05G0509300 | 61.51712   | 116.25951  | -0.91829 | 0.00446  |
| OS05G0510100 | 4803.88995 | 2252.57376 | 1.0926   | 3.73E-09 |
| OS05G0512200 | 2700.07855 | 1711.68584 | 0.65758  | 0.00124  |
| OS05G0513100 | 673.62508  | 278.3794   | 1.2749   | 9.75E-10 |
| OS05G0515200 | 950.90117  | 410.79452  | 1.2109   | 5.70E-05 |
| OS05G0516600 | 1417.12647 | 984.30184  | 0.5258   | 0.02312  |
| OS05G0517500 | 335.77483  | 223.06004  | 0.59006  | 0.03617  |
| OS05G0517800 | 60.78034   | 106.45375  | -0.80855 | 0.02433  |
| OS05G0519200 | 757.23252  | 1121.88932 | -0.56712 | 0.01284  |
| OS05G0519300 | 1521.99796 | 809.37447  | 0.91109  | 6.57E-06 |
| OS05G0519500 | 33.10676   | 96.4602    | -1.5428  | 7.52E-06 |
| OS05G0519900 | 495.73528  | 700.7272   | -0.49928 | 0.03493  |
| OS05G0521900 | 47.93769   | 16.70434   | 1.5209   | 0.01088  |
| OS05G0522600 | 753.81561  | 1206.4203  | -0.67845 | 0.00242  |
| OS05G0524100 | 585.20752  | 346.70916  | 0.75522  | 0.00083  |
| OS05G0524400 | 146.39478  | 264.64667  | -0.8542  | 0.00081  |
| OS05G0526700 | 208.46444  | 59.36209   | 1.8122   | 5.59E-12 |
| OS05G0527900 | 74.06258   | 22.97503   | 1.6887   | 0.00584  |
| OS05G0531000 | 389.19452  | 197.90048  | 0.97572  | 0.03835  |
| OS05G0533100 | 1518.22389 | 2499.65868 | -0.71935 | 0.00051  |
| OS05G0533500 | 4160.86638 | 2116.37098 | 0.97529  | 2.60E-07 |
| OS05G0533700 | 1366.09777 | 963.85763  | 0.50317  | 0.02586  |
| OS05G0534100 | 265.2786   | 123.95142  | 1.0977   | 1.55E-05 |
| OS05G0534400 | 290.21322  | 158.82511  | 0.86967  | 0.00263  |
| OS05G0537100 | 812.62342  | 270.97704  | 1.5844   | 3.02E-15 |

---



---

|              |            |            |          |          |
|--------------|------------|------------|----------|----------|
| OS05G0537400 | 1113.49235 | 762.76212  | 0.54579  | 0.01564  |
| OS05G0539600 | 59.0511    | 157.18645  | -1.4124  | 0.00057  |
| OS05G0540000 | 210.35893  | 399.14889  | -0.92407 | 0.0001   |
| OS05G0541000 | 11.61952   | 2.07975    | 2.4821   | 0.02455  |
| OS05G0541200 | 495.29801  | 255.50258  | 0.95496  | 1.91E-05 |
| OS05G0542200 | 1124.02935 | 579.72775  | 0.95523  | 2.20E-06 |
| OS05G0542300 | 2.81059    | 21.7583    | -2.9526  | 0.00026  |
| OS05G0542732 | 129.70418  | 307.04046  | -1.2432  | 1.98E-06 |
| OS05G0542800 | 9.17732    | 25.08394   | -1.4506  | 0.03878  |
| OS05G0543700 | 1031.12014 | 740.13589  | 0.47835  | 0.04993  |
| OS05G0546300 | 2464.35044 | 741.41864  | 1.7328   | 1.99E-09 |
| OS05G0547800 | 22.95327   | 48.06819   | -1.0664  | 0.04118  |
| OS05G0549100 | 1643.20535 | 849.27143  | 0.95222  | 3.71E-06 |
| OS05G0549700 | 140.2996   | 279.46252  | -0.99414 | 0.01051  |
| OS05G0549900 | 24.42312   | 97.66313   | -1.9996  | 1.48E-08 |
| OS05G0552100 | 674.02361  | 467.88874  | 0.52663  | 0.03987  |
| OS05G0552300 | 295.91338  | 449.60417  | -0.60348 | 0.01319  |
| OS05G0553400 | 91.07758   | 427.57183  | -2.231   | 7.55E-22 |
| OS05G0555300 | 1475.94097 | 962.07058  | 0.61742  | 0.00451  |
| OS05G0555700 | 72.01628   | 204.18434  | -1.5035  | 1.25E-08 |
| OS05G0555900 | 11.69093   | 29.89077   | -1.3543  | 0.03246  |
| OS05G0556900 | 162.7268   | 301.53612  | -0.88988 | 0.00034  |
| OS05G0557000 | 150.54475  | 228.65051  | -0.60295 | 0.0312   |
| OS05G0558000 | 86.8762    | 199.89599  | -1.2022  | 8.69E-06 |
| OS05G0560400 | 113.93206  | 66.21809   | 0.78288  | 0.02329  |
| OS05G0560900 | 0          | 7.68473    |          | 0.0135   |
| OS05G0561600 | 5621.63345 | 2993.52405 | 0.90914  | 2.19E-06 |

---

---

|              |            |            |          |          |
|--------------|------------|------------|----------|----------|
| OS05G0561700 | 58.43583   | 26.14703   | 1.1602   | 0.0057   |
| OS05G0563900 | 69.58172   | 38.49251   | 0.85413  | 0.0399   |
| OS05G0566400 | 902.06377  | 404.60915  | 1.1567   | 1.09E-06 |
| OS05G0566800 | 80.58351   | 34.99298   | 1.2034   | 0.00126  |
| OS05G0567400 | 99.58712   | 246.48392  | -1.3075  | 2.07E-07 |
| OS05G0568600 | 561.53846  | 128.83756  | 2.1238   | 1.70E-14 |
| OS05G0568800 | 608.05424  | 224.79814  | 1.4356   | 7.17E-06 |
| OS05G0570900 | 12.43649   | 2.20359    | 2.4967   | 0.02349  |
| OS05G0571000 | 2541.63606 | 1832.27821 | 0.47212  | 0.04075  |
| OS05G0571100 | 67.24731   | 112.68541  | -0.74475 | 0.03505  |
| OS05G0573700 | 2214.62018 | 1598.83524 | 0.47004  | 0.04359  |
| OS05G0574400 | 2119.06962 | 732.37929  | 1.5328   | 7.02E-07 |
| OS05G0574600 | 43.04331   | 18.54184   | 1.215    | 0.01768  |
| OS05G0574800 | 7.45686    | 21.35919   | -1.5182  | 0.04823  |
| OS05G0576500 | 45.6285    | 311.43573  | -2.7709  | 1.86E-11 |
| OS05G0576600 | 446.09936  | 163.90722  | 1.4445   | 5.99E-11 |
| OS05G0576800 | 49.40766   | 85.25773   | -0.7871  | 0.04405  |
| OS05G0577500 | 5.0285     | 22.3887    | -2.1546  | 0.00551  |
| OS05G0578100 | 1084.12232 | 499.48745  | 1.118    | 2.62E-08 |
| OS05G0579500 | 357.03511  | 186.31902  | 0.93829  | 0.01749  |
| OS05G0579900 | 1895.54547 | 1288.031   | 0.55745  | 0.01187  |
| OS05G0580200 | 9.99301    | 30.0292    | -1.5874  | 0.01213  |
| OS05G0582000 | 1207.10939 | 446.24234  | 1.4357   | 7.12E-09 |
| OS05G0582300 | 2646.41705 | 1304.64067 | 1.0204   | 1.17E-07 |
| OS05G0582350 | 819.03642  | 403.51519  | 1.0213   | 1.26E-06 |
| OS05G0582500 | 74.20179   | 30.75048   | 1.2708   | 0.0252   |
| OS05G0582800 | 597.1291   | 424.34797  | 0.4928   | 0.04769  |

---

---

|              |             |             |          |          |
|--------------|-------------|-------------|----------|----------|
| OS05G0584600 | 82.29757    | 42.19542    | 0.96376  | 0.01186  |
| OS05G0585800 | 66.72104    | 28.42842    | 1.2308   | 0.00255  |
| OS05G0585900 | 14360.78925 | 8585.92464  | 0.74209  | 0.00014  |
| OS05G0586050 | 3371.90513  | 1760.96105  | 0.9372   | 8.79E-07 |
| OS05G0586200 | 1905.5346   | 1098.85475  | 0.7942   | 9.15E-05 |
| OS05G0586300 | 183.28303   | 97.38826    | 0.91225  | 0.00095  |
| OS05G0586600 | 16487.25933 | 9633.33454  | 0.77524  | 5.44E-05 |
| OS05G0589600 | 496.37422   | 738.89727   | -0.57395 | 0.01392  |
| OS05G0589700 | 126.95987   | 74.54305    | 0.76823  | 0.03813  |
| OS05G0591900 | 139.3063    | 281.1228    | -1.0129  | 6.45E-05 |
| OS05G0592100 | 2065.55858  | 1455.36508  | 0.50515  | 0.02105  |
| OS05G0592300 | 15.37491    | 55.00624    | -1.839   | 3.55E-05 |
| OS05G0592800 | 1484.45832  | 944.49432   | 0.65232  | 0.00233  |
| OS05G0594200 | 10.275      | 34.4843     | -1.7468  | 0.00221  |
| OS05G0594700 | 1081.56705  | 674.06411   | 0.68217  | 0.00181  |
| OS05G0596500 | 5.42193     | 21.61239    | -1.995   | 0.01071  |
| OS05G0596600 | 168.20167   | 254.43894   | -0.59713 | 0.02768  |
| OS05G0597100 | 100.27626   | 197.73054   | -0.97956 | 0.00031  |
| OS06G0101100 | 63.438      | 120.32726   | -0.92354 | 0.00633  |
| OS06G0101600 | 24827.55527 | 14416.08876 | 0.78426  | 0.03097  |
| OS06G0102100 | 3105.94648  | 419.053     | 2.8898   | 0.03083  |
| OS06G0103400 | 85.29979    | 157.47007   | -0.88446 | 0.00404  |
| OS06G0103800 | 1052.39208  | 643.63547   | 0.70936  | 0.00117  |
| OS06G0105800 | 1348.86768  | 929.61808   | 0.53704  | 0.02002  |
| OS06G0107100 | 310.55063   | 92.4549     | 1.748    | 0.02822  |
| OS06G0108500 | 260.32134   | 14.68749    | 4.1476   | 3.16E-17 |
| OS06G0108900 | 2305.96146  | 1330.29469  | 0.79362  | 8.64E-05 |

---

---

|              |            |            |          |          |
|--------------|------------|------------|----------|----------|
| OS06G0109500 | 59.07232   | 22.10428   | 1.4182   | 0.00086  |
| OS06G0110000 | 398.74144  | 1100.06075 | -1.4641  | 5.96E-09 |
| OS06G0111400 | 740.57047  | 1113.14349 | -0.58793 | 0.00902  |
| OS06G0111700 | 48.64449   | 116.64288  | -1.2618  | 0.0001   |
| OS06G0111800 | 242.84274  | 500.7145   | -1.044   | 3.13E-06 |
| OS06G0114366 | 22.1965    | 46.6797    | -1.0725  | 0.03926  |
| OS06G0114400 | 163.64688  | 39.07293   | 2.0663   | 4.78E-06 |
| OS06G0114500 | 299.04564  | 153.51898  | 0.96195  | 0.00013  |
| OS06G0115200 | 61.24519   | 149.30103  | -1.2856  | 0.00011  |
| OS06G0115300 | 565.33217  | 318.79877  | 0.82645  | 0.00024  |
| OS06G0116500 | 1249.6205  | 851.9754   | 0.55261  | 0.01384  |
| OS06G0116600 | 98.53698   | 181.16675  | -0.87858 | 0.00229  |
| OS06G0116900 | 76.16654   | 4.47559    | 4.089    | 5.23E-07 |
| OS06G0118600 | 205.62248  | 91.21343   | 1.1727   | 7.09E-06 |
| OS06G0118700 | 368.37944  | 25.80696   | 3.8354   | 3.42E-23 |
| OS06G0119100 | 123.67548  | 41.20446   | 1.5857   | 0.00502  |
| OS06G0119300 | 16.3071    | 3.09089    | 2.3994   | 0.03786  |
| OS06G0119800 | 268.18459  | 115.33818  | 1.2174   | 4.98E-07 |
| OS06G0119900 | 139.79114  | 37.26113   | 1.9075   | 1.76E-10 |
| OS06G0120200 | 438.77191  | 106.07591  | 2.0484   | 8.68E-20 |
| OS06G0125800 | 168.40839  | 80.1001    | 1.0721   | 0.02271  |
| OS06G0127200 | 35.40114   | 66.83382   | -0.91678 | 0.02122  |
| OS06G0128600 | 158.26741  | 253.56886  | -0.68001 | 0.03142  |
| OS06G0128700 | 680.4396   | 1060.91651 | -0.64077 | 0.02296  |
| OS06G0129100 | 85.39387   | 414.99685  | -2.2809  | 5.22E-15 |
| OS06G0129800 | 21.48847   | 57.02308   | -1.408   | 0.00171  |
| OS06G0129900 | 1939.68087 | 818.08488  | 1.2455   | 1.08E-10 |

---

---

|              |             |             |          |          |
|--------------|-------------|-------------|----------|----------|
| OS06G0130800 | 3676.36595  | 5260.94595  | -0.51704 | 0.01801  |
| OS06G0131100 | 50.75583    | 92.22124    | -0.86153 | 0.0196   |
| OS06G0131400 | 714.44273   | 412.2599    | 0.79326  | 0.00067  |
| OS06G0133800 | 24400.74834 | 14113.78209 | 0.78982  | 4.86E-05 |
| OS06G0136000 | 149.98458   | 227.75004   | -0.60264 | 0.04254  |
| OS06G0137500 | 103.99046   | 187.00563   | -0.84663 | 0.00244  |
| OS06G0139200 | 15.62047    | 60.59262    | -1.9557  | 9.94E-06 |
| OS06G0139800 | 92.87455    | 52.66037    | 0.81857  | 0.02949  |
| OS06G0140200 | 23.41196    | 51.12407    | -1.1268  | 0.0156   |
| OS06G0140800 | 545.43883   | 804.38254   | -0.56046 | 0.02014  |
| OS06G0141166 | 381.25456   | 234.30327   | 0.70238  | 0.00423  |
| OS06G0142700 | 114.88672   | 213.32648   | -0.89285 | 0.00088  |
| OS06G0143400 | 768.36763   | 302.20259   | 1.3463   | 5.99E-11 |
| OS06G0145600 | 7.68115     | 29.0771     | -1.9205  | 0.00325  |
| OS06G0146300 | 2213.18423  | 1582.24745  | 0.48415  | 0.0315   |
| OS06G0147000 | 78.33533    | 23.57562    | 1.7324   | 7.74E-06 |
| OS06G0149900 | 763.53965   | 493.96856   | 0.62828  | 0.01249  |
| OS06G0152700 | 351.11494   | 180.06417   | 0.96343  | 7.26E-05 |
| OS06G0154500 | 649.26114   | 432.49834   | 0.5861   | 0.01491  |
| OS06G0155500 | 558.7483    | 326.71362   | 0.77417  | 0.00065  |
| OS06G0155600 | 787.63473   | 562.34697   | 0.48607  | 0.04457  |
| OS06G0158300 | 160.88126   | 255.29266   | -0.66616 | 0.01584  |
| OS06G0158600 | 73.82827    | 122.27198   | -0.72785 | 0.03643  |
| OS06G0158900 | 444.39017   | 204.64294   | 1.1187   | 0.00901  |
| OS06G0159400 | 1.58885     | 15.5286     | -3.2889  | 0.00153  |
| OS06G0160700 | 1312.35139  | 436.72211   | 1.5874   | 5.05E-13 |
| OS06G0164100 | 144.21685   | 233.89933   | -0.69765 | 0.01261  |

---

---

|              |            |            |          |          |
|--------------|------------|------------|----------|----------|
| OS06G0164400 | 324.66553  | 214.46784  | 0.59819  | 0.02326  |
| OS06G0164600 | 120.78253  | 56.18441   | 1.1042   | 0.00163  |
| OS06G0165500 | 1068.70831 | 391.77894  | 1.4478   | 1.07E-10 |
| OS06G0167200 | 42.41059   | 15.55462   | 1.4471   | 0.00286  |
| OS06G0167400 | 1224.75676 | 548.0773   | 1.16     | 5.31E-09 |
| OS06G0168500 | 110.25679  | 380.09093  | -1.7855  | 9.54E-15 |
| OS06G0172200 | 1588.21185 | 1114.75858 | 0.51067  | 0.02309  |
| OS06G0179200 | 120.35008  | 64.31027   | 0.90412  | 0.00687  |
| OS06G0182100 | 134.29636  | 67.79901   | 0.98608  | 0.001    |
| OS06G0185900 | 1795.8411  | 962.32638  | 0.90006  | 5.04E-06 |
| OS06G0185966 | 69.26963   | 29.01632   | 1.2554   | 0.00148  |
| OS06G0186400 | 466.6696   | 292.23696  | 0.67526  | 0.00503  |
| OS06G0186900 | 93.76671   | 160.87941  | -0.77883 | 0.00949  |
| OS06G0187500 | 83.05196   | 139.9555   | -0.75288 | 0.0147   |
| OS06G0188550 | 98.3228    | 162.68167  | -0.72645 | 0.01584  |
| OS06G0188600 | 78.14496   | 127.06958  | -0.70139 | 0.04094  |
| OS06G0191300 | 581.22041  | 378.51783  | 0.61872  | 0.00867  |
| OS06G0192800 | 59.49208   | 137.33613  | -1.2069  | 0.00179  |
| OS06G0192900 | 477.36535  | 314.98882  | 0.59979  | 0.017    |
| OS06G0195800 | 15.59542   | 66.44489   | -2.091   | 0.00043  |
| OS06G0196200 | 121.24724  | 36.04677   | 1.75     | 1.51E-08 |
| OS06G0196900 | 282.34026  | 459.79122  | -0.70354 | 0.00358  |
| OS06G0199300 | 1501.79694 | 768.66043  | 0.96627  | 1.04E-06 |
| OS06G0199400 | 3755.23846 | 1813.54696 | 1.0501   | 1.68E-08 |
| OS06G0199700 | 31.63186   | 12.48391   | 1.3413   | 0.02737  |
| OS06G0200350 | 10.16593   | 40.1506    | -1.9817  | 0.00021  |
| OS06G0202300 | 37.47988   | 75.56839   | -1.0117  | 0.00828  |

---

---

|              |            |            |          |          |
|--------------|------------|------------|----------|----------|
| OS06G0202400 | 102.27608  | 253.20347  | -1.3078  | 1.54E-07 |
| OS06G0204400 | 1171.58906 | 582.83429  | 1.0073   | 6.98E-07 |
| OS06G0205600 | 457.18788  | 219.38968  | 1.0593   | 1.51E-06 |
| OS06G0206900 | 160.55048  | 70.57765   | 1.1857   | 0.00837  |
| OS06G0207000 | 202.25454  | 122.0094   | 0.72918  | 0.04254  |
| OS06G0210400 | 28.78124   | 103.16122  | -1.8417  | 9.38E-08 |
| OS06G0210500 | 124.2533   | 315.3666   | -1.3437  | 1.88E-08 |
| OS06G0214800 | 619.3467   | 234.40068  | 1.4018   | 2.13E-11 |
| OS06G0214850 | 559.43666  | 299.21365  | 0.9028   | 0.02019  |
| OS06G0216700 | 297.65073  | 126.67526  | 1.2325   | 0.00433  |
| OS06G0216800 | 28.25998   | 58.36892   | -1.0464  | 0.01756  |
| OS06G0217600 | 793.03909  | 533.53432  | 0.57181  | 0.01491  |
| OS06G0218300 | 420.82462  | 264.65888  | 0.66909  | 0.00547  |
| OS06G0218900 | 5.64622    | 156.41407  | -4.7919  | 4.56E-18 |
| OS06G0219700 | 416.4349   | 283.71745  | 0.55364  | 0.02573  |
| OS06G0220800 | 151.78783  | 260.30746  | -0.77816 | 0.00356  |
| OS06G0222400 | 308.75433  | 183.44035  | 0.75115  | 0.00348  |
| OS06G0223700 | 445.80564  | 207.78021  | 1.1014   | 0.00258  |
| OS06G0224200 | 28.50431   | 67.36608   | -1.2408  | 0.00238  |
| OS06G0225400 | 136.91305  | 213.2229   | -0.6391  | 0.0299   |
| OS06G0228200 | 1659.01497 | 821.08996  | 1.0147   | 0.00263  |
| OS06G0230000 | 91.3132    | 5.22431    | 4.1275   | 2.65E-13 |
| OS06G0230100 | 82.06444   | 7.74952    | 3.4046   | 2.04E-15 |
| OS06G0231300 | 100.65093  | 159.54696  | -0.66462 | 0.0322   |
| OS06G0232000 | 2996.04627 | 2115.08804 | 0.50234  | 0.02093  |
| OS06G0232400 | 2.38705    | 12.63361   | -2.404   | 0.03002  |
| OS06G0232800 | 48.22851   | 91.23037   | -0.91963 | 0.01172  |

---

---

|              |            |            |          |          |
|--------------|------------|------------|----------|----------|
| OS06G0233000 | 112.58117  | 50.34178   | 1.1611   | 0.00038  |
| OS06G0233800 | 510.8192   | 312.64384  | 0.70829  | 0.03453  |
| OS06G0234200 | 46.81891   | 14.77066   | 1.6644   | 0.01113  |
| OS06G0235500 | 21.47098   | 1.97624    | 3.4416   | 3.24E-05 |
| OS06G0236300 | 186.23649  | 94.21051   | 0.98318  | 0.00034  |
| OS06G0241100 | 45.56838   | 6.35007    | 2.8432   | 0.02298  |
| OS06G0242900 | 97.54064   | 6.204      | 3.9747   | 1.11E-06 |
| OS06G0243100 | 15.36985   | 3.91914    | 1.9715   | 0.03289  |
| OS06G0244100 | 70.85355   | 119.18534  | -0.75029 | 0.03485  |
| OS06G0245700 | 80.91547   | 212.46163  | -1.3927  | 1.59E-07 |
| OS06G0245800 | 3658.53349 | 2589.00574 | 0.49887  | 0.02255  |
| OS06G0246500 | 68.15573   | 32.19037   | 1.0822   | 0.0077   |
| OS06G0247900 | 93.55243   | 49.67851   | 0.91315  | 0.0083   |
| OS06G0250600 | 756.16386  | 419.82878  | 0.8489   | 0.00038  |
| OS06G0254300 | 858.42928  | 562.40314  | 0.61009  | 0.00802  |
| OS06G0254600 | 20.86319   | 3.53099    | 2.5628   | 0.00125  |
| OS06G0255001 | 85.85251   | 38.78812   | 1.1462   | 0.00142  |
| OS06G0255100 | 118.41534  | 66.98406   | 0.82197  | 0.01603  |
| OS06G0256500 | 865.9987   | 292.32295  | 1.5668   | 4.75E-12 |
| OS06G0262800 | 455.41794  | 186.81824  | 1.2856   | 0.00016  |
| OS06G0263801 | 59.29288   | 124.91485  | -1.075   | 0.00811  |
| OS06G0267200 | 66.98536   | 111.75902  | -0.73847 | 0.03741  |
| OS06G0268500 | 30.54301   | 92.01259   | -1.591   | 6.71E-06 |
| OS06G0269300 | 81.65487   | 136.81931  | -0.74466 | 0.02561  |
| OS06G0271900 | 69.21953   | 117.37164  | -0.76183 | 0.02636  |
| OS06G0272700 | 15.06282   | 48.02933   | -1.6729  | 0.00062  |
| OS06G0273300 | 17.41234   | 3.64734    | 2.2552   | 0.00882  |

---



---

|              |            |            |          |          |
|--------------|------------|------------|----------|----------|
| OS06G0274100 | 47.5381    | 82.49351   | -0.7952  | 0.04415  |
| OS06G0274500 | 499.05167  | 817.45234  | -0.71195 | 0.00124  |
| OS06G0275500 | 5.86045    | 20.38486   | -1.7984  | 0.02557  |
| OS06G0275800 | 876.56343  | 341.17251  | 1.3614   | 1.43E-11 |
| OS06G0280900 | 69.43262   | 209.14854  | -1.5908  | 2.57E-09 |
| OS06G0283300 | 138.29     | 323.79457  | -1.2274  | 3.40E-07 |
| OS06G0288100 | 1106.91807 | 1651.23554 | -0.577   | 0.00882  |
| OS06G0288300 | 821.92114  | 137.56802  | 2.5789   | 0.00266  |
| OS06G0291800 | 88.52883   | 177.69307  | -1.0052  | 0.02624  |
| OS06G0293100 | 44.08724   | 11.87378   | 1.8926   | 0.00013  |
| OS06G0293500 | 1.56631    | 28.24175   | -4.1724  | 2.37E-07 |
| OS06G0294000 | 289.91645  | 37.60158   | 2.9468   | 2.73E-07 |
| OS06G0295900 | 26.15606   | 61.99554   | -1.245   | 0.00513  |
| OS06G0297400 | 21.59126   | 90.77356   | -2.0718  | 1.50E-08 |
| OS06G0298500 | 18.67666   | 44.59301   | -1.2556  | 0.01063  |
| OS06G0305200 | 163.30096  | 274.76113  | -0.75064 | 0.00371  |
| OS06G0306300 | 25.74751   | 591.16534  | -4.5211  | 4.99E-70 |
| OS06G0311300 | 74.36576   | 127.25073  | -0.77496 | 0.02352  |
| OS06G0311600 | 118.34648  | 244.45399  | -1.0465  | 4.79E-05 |
| OS06G0314300 | 7.26517    | 0          |          | 0.00378  |
| OS06G0314501 | 22.76401   | 169.8462   | -2.8994  | 7.03E-13 |
| OS06G0316000 | 128.02975  | 381.31569  | -1.5745  | 3.57E-07 |
| OS06G0316300 | 3948.68906 | 929.79003  | 2.0864   | 4.80E-29 |
| OS06G0318533 | 164.20543  | 77.82408   | 1.0772   | 0.00019  |
| OS06G0318600 | 48.37634   | 24.19703   | 0.99947  | 0.03898  |
| OS06G0319700 | 56.82444   | 98.8354    | -0.79852 | 0.03543  |
| OS06G0320200 | 16.77079   | 1.97624    | 3.0851   | 0.00075  |

---

---

|              |            |            |          |          |
|--------------|------------|------------|----------|----------|
| OS06G0326400 | 1826.20974 | 620.6935   | 1.5569   | 4.48E-16 |
| OS06G0328966 | 16.14551   | 38.59223   | -1.2572  | 0.02278  |
| OS06G0334100 | 108.32087  | 212.95441  | -0.97523 | 0.00028  |
| OS06G0335975 | 8.53577    | 23.72706   | -1.4749  | 0.04418  |
| OS06G0338200 | 28.92279   | 2.45316    | 3.5595   | 5.12E-07 |
| OS06G0340200 | 2802.72097 | 1874.00043 | 0.58071  | 0.00804  |
| OS06G0345200 | 592.99429  | 309.10493  | 0.93992  | 1.77E-05 |
| OS06G0348800 | 5395.8054  | 3386.6533  | 0.67198  | 0.00078  |
| OS06G0352900 | 200.144    | 129.76403  | 0.62515  | 0.0332   |
| OS06G0353400 | 231.52292  | 344.58479  | -0.5737  | 0.02945  |
| OS06G0356800 | 69.56648   | 2.61571    | 4.7331   | 2.54E-08 |
| OS06G0358800 | 5.74017    | 19.33502   | -1.752   | 0.03606  |
| OS06G0360300 | 271.88865  | 176.71521  | 0.62159  | 0.02524  |
| OS06G0367500 | 10.07448   | 0.80603    | 3.6437   | 0.01403  |
| OS06G0472700 | 80.64359   | 140.23039  | -0.79817 | 0.01149  |
| OS06G0475400 | 77.21515   | 25.89051   | 1.5765   | 0.00032  |
| OS06G0478600 | 4.65005    | 0          |          | 0.04633  |
| OS06G0480500 | 482.0073   | 131.77447  | 1.871    | 0.00071  |
| OS06G0494100 | 9.33525    | 44.69597   | -2.2594  | 0.00015  |
| OS06G0494400 | 433.78911  | 754.42808  | -0.79839 | 0.00473  |
| OS06G0498500 | 94.23418   | 173.42985  | -0.88003 | 0.00235  |
| OS06G0498900 | 146.96987  | 255.08473  | -0.79546 | 0.00335  |
| OS06G0499100 | 24.05345   | 97.26938   | -2.0157  | 2.81E-08 |
| OS06G0500300 | 137.65966  | 37.93741   | 1.8594   | 1.83E-08 |
| OS06G0503400 | 1662.20735 | 1030.80164 | 0.68933  | 0.00106  |
| OS06G0505700 | 28.59571   | 5.48863    | 2.3813   | 0.00014  |
| OS06G0520733 | 89.45732   | 27.73717   | 1.6894   | 0.01876  |

---

---

|              |            |            |          |           |
|--------------|------------|------------|----------|-----------|
| OS06G0521500 | 7.99689    | 708.50115  | -6.4692  | 8.89E-105 |
| OS06G0522300 | 1.19164    | 31.44323   | -4.7217  | 7.33E-09  |
| OS06G0523100 | 1484.08243 | 892.79024  | 0.73318  | 0.00107   |
| OS06G0523300 | 2530.5474  | 1590.94799 | 0.66956  | 0.00123   |
| OS06G0524400 | 326.63866  | 96.31664   | 1.7618   | 0.04652   |
| OS06G0526800 | 58.39321   | 21.8566    | 1.4177   | 0.01868   |
| OS06G0528600 | 3640.50939 | 1935.06525 | 0.91176  | 3.12E-06  |
| OS06G0535400 | 400.46831  | 823.31995  | -1.0398  | 1.03E-06  |
| OS06G0539400 | 82.5081    | 170.69088  | -1.0488  | 0.00072   |
| OS06G0542200 | 52.76066   | 10.19156   | 2.3721   | 0.00012   |
| OS06G0542300 | 3.83308    | 16.49907   | -2.1058  | 0.02559   |
| OS06G0543200 | 449.44888  | 310.87459  | 0.53182  | 0.03937   |
| OS06G0543400 | 140.42763  | 83.79009   | 0.74498  | 0.019     |
| OS06G0550800 | 177.67307  | 82.23102   | 1.1115   | 5.11E-05  |
| OS06G0551800 | 262.38566  | 125.48597  | 1.0642   | 3.05E-05  |
| OS06G0552700 | 4.89688    | 0          |          | 0.03376   |
| OS06G0553001 | 31.77731   | 6.73649    | 2.2379   | 0.00511   |
| OS06G0554600 | 765.25383  | 258.14813  | 1.5677   | 1.43E-12  |
| OS06G0556000 | 85.3374    | 46.57099   | 0.87375  | 0.0164    |
| OS06G0557100 | 597.23154  | 982.40968  | -0.71803 | 0.00134   |
| OS06G0558300 | 74.90456   | 152.57645  | -1.0264  | 0.00058   |
| OS06G0560300 | 15.66683   | 2.15739    | 2.8604   | 0.00352   |
| OS06G0562600 | 226.92917  | 369.93271  | -0.70502 | 0.004     |
| OS06G0564500 | 885.91333  | 429.41454  | 1.0448   | 0.00074   |
| OS06G0565000 | 3.80676    | 14.95181   | -1.9737  | 0.04978   |
| OS06G0567000 | 129.3532   | 225.34757  | -0.80084 | 0.00298   |
| OS06G0568200 | 385.62142  | 258.47711  | 0.57715  | 0.02402   |

---

---

|              |            |             |          |          |
|--------------|------------|-------------|----------|----------|
| OS06G0569500 | 1406.62531 | 364.69515   | 1.9475   | 9.23E-24 |
| OS06G0571400 | 230.19857  | 347.86659   | -0.59566 | 0.0202   |
| OS06G0571800 | 573.715    | 314.3321    | 0.86804  | 0.0036   |
| OS06G0574400 | 63.11225   | 112.06787   | -0.82838 | 0.01361  |
| OS06G0579100 | 851.17425  | 3433.04203  | -2.012   | 4.37E-07 |
| OS06G0579600 | 40.47217   | 84.20332    | -1.0569  | 0.00446  |
| OS06G0579800 | 17.75563   | 2.5327      | 2.8095   | 0.00106  |
| OS06G0580100 | 6418.61467 | 11277.07935 | -0.81306 | 4.16E-05 |
| OS06G0581500 | 122.00779  | 386.00917   | -1.6617  | 4.33E-13 |
| OS06G0585982 | 19.62019   | 48.70978    | -1.3119  | 0.00608  |
| OS06G0586150 | 1.39338    | 10.98458    | -2.9788  | 0.02571  |
| OS06G0589300 | 7.38923    | 28.2546     | -1.935   | 0.00303  |
| OS06G0591200 | 16.83715   | 49.31265    | -1.5503  | 0.00161  |
| OS06G0592200 | 41.69391   | 19.56599    | 1.0915   | 0.03897  |
| OS06G0593800 | 1936.06388 | 639.20845   | 1.5988   | 7.29E-14 |
| OS06G0594100 | 1945.72594 | 1335.01585  | 0.54345  | 0.01681  |
| OS06G0596300 | 306.80859  | 444.00846   | -0.53325 | 0.03895  |
| OS06G0597400 | 27.73998   | 64.47652    | -1.2168  | 0.00311  |
| OS06G0597900 | 1634.10852 | 1104.99633  | 0.56446  | 0.01001  |
| OS06G0600700 | 1055.25578 | 561.93816   | 0.90911  | 1.76E-05 |
| OS06G0601100 | 4190.5526  | 2762.76755  | 0.60103  | 0.00412  |
| OS06G0601500 | 293.57636  | 101.15848   | 1.5371   | 2.53E-05 |
| OS06G0601600 | 50.41144   | 95.28241    | -0.91846 | 0.00775  |
| OS06G0602500 | 68.48781   | 144.55369   | -1.0777  | 0.00033  |
| OS06G0602600 | 82.40901   | 179.71686   | -1.1249  | 5.09E-05 |
| OS06G0603000 | 6008.69518 | 3451.61019  | 0.79978  | 2.99E-05 |
| OS06G0603400 | 15.14556   | 39.14293    | -1.3699  | 0.01135  |

---

---

|              |             |             |          |          |
|--------------|-------------|-------------|----------|----------|
| OS06G0604200 | 79.84161    | 15.54524    | 2.3607   | 5.85E-10 |
| OS06G0604300 | 696.17658   | 162.84832   | 2.0959   | 3.90E-21 |
| OS06G0604400 | 1032.54554  | 592.07702   | 0.80235  | 0.00011  |
| OS06G0604500 | 637.69666   | 406.75272   | 0.64872  | 0.00399  |
| OS06G0604600 | 2254.21095  | 1614.59616  | 0.48145  | 0.03086  |
| OS06G0605900 | 997.91387   | 4032.96312  | -2.0149  | 0.00028  |
| OS06G0608700 | 20387.15672 | 10842.61937 | 0.91095  | 1.41E-06 |
| OS06G0608800 | 373.41004   | 555.75308   | -0.57368 | 0.01774  |
| OS06G0609600 | 245.92157   | 360.78586   | -0.55294 | 0.03003  |
| OS06G0609700 | 164.22419   | 98.56051    | 0.73659  | 0.01818  |
| OS06G0611900 | 19937.07875 | 13276.55551 | 0.58657  | 0.00446  |
| OS06G0612200 | 21.96843    | 47.1384     | -1.1015  | 0.02826  |
| OS06G0614100 | 76.99361    | 147.38729   | -0.9368  | 0.02079  |
| OS06G0614300 | 141.25594   | 214.68201   | -0.60389 | 0.03974  |
| OS06G0617800 | 770.64199   | 435.47865   | 0.82346  | 0.00014  |
| OS06G0618700 | 37.85565    | 324.70814   | -3.1006  | 2.28E-26 |
| OS06G0624850 | 7.78644     | 33.64508    | -2.1114  | 0.00043  |
| OS06G0632200 | 308.45715   | 129.0288    | 1.2574   | 0.0009   |
| OS06G0632500 | 19.97987    | 3.11311     | 2.6821   | 0.00099  |
| OS06G0634300 | 1486.1705   | 840.07946   | 0.823    | 5.67E-05 |
| OS06G0635200 | 269.76342   | 175.11459   | 0.6234   | 0.02317  |
| OS06G0637500 | 43.72501    | 81.72825    | -0.90238 | 0.02775  |
| OS06G0638200 | 1464.41638  | 979.33442   | 0.58045  | 0.00813  |
| OS06G0638300 | 68.23092    | 115.69133   | -0.76178 | 0.0271   |
| OS06G0640201 | 19.40596    | 5.17063     | 1.9081   | 0.01526  |
| OS06G0640599 | 2574.71961  | 539.15458   | 2.2556   | 1.72E-21 |
| OS06G0641866 | 77.30405    | 192.79752   | -1.3185  | 1.81E-06 |

---

---

|              |             |             |          |          |
|--------------|-------------|-------------|----------|----------|
| OS06G0644600 | 20.22042    | 59.42066    | -1.5552  | 0.00023  |
| OS06G0644700 | 111.897     | 176.1743    | -0.65483 | 0.03666  |
| OS06G0645400 | 102.18093   | 193.85207   | -0.92383 | 0.0009   |
| OS06G0646700 | 762.21535   | 336.23443   | 1.1807   | 9.08E-09 |
| OS06G0649900 | 14.17822    | 53.81758    | -1.9244  | 3.54E-05 |
| OS06G0650100 | 111.60763   | 174.94392   | -0.64846 | 0.03098  |
| OS06G0650600 | 449.36227   | 742.60248   | -0.72471 | 0.0012   |
| OS06G0650800 | 415.33991   | 234.43522   | 0.8251   | 0.00046  |
| OS06G0651000 | 311.31393   | 1410.39325  | -2.1797  | 4.62E-28 |
| OS06G0651200 | 253.32569   | 97.81038    | 1.3729   | 3.90E-08 |
| OS06G0652000 | 17.92983    | 42.15428    | -1.2333  | 0.01746  |
| OS06G0652250 | 55.03384    | 20.59013    | 1.4184   | 0.00305  |
| OS06G0652300 | 1347.8204   | 115.94784   | 3.5391   | 3.22E-18 |
| OS06G0653800 | 127.32956   | 210.79259   | -0.72726 | 0.01105  |
| OS06G0654900 | 30216.81324 | 15718.86593 | 0.94285  | 4.32E-07 |
| OS06G0655500 | 2376.66603  | 3547.6825   | -0.57794 | 0.0083   |
| OS06G0656300 | 1001.83112  | 438.5483    | 1.1918   | 1.99E-05 |
| OS06G0658200 | 4.3017      | 23.59959    | -2.4558  | 0.00105  |
| OS06G0661200 | 1463.45856  | 393.59527   | 1.8946   | 3.44E-13 |
| OS06G0661766 | 347.2755    | 213.5025    | 0.70183  | 0.00479  |
| OS06G0661800 | 571.47375   | 221.91013   | 1.3647   | 0.00043  |
| OS06G0661900 | 83.69481    | 200.10141   | -1.2575  | 3.69E-06 |
| OS06G0662200 | 692.12649   | 391.08726   | 0.82355  | 0.00023  |
| OS06G0662550 | 13.33998    | 1.9429      | 2.7795   | 0.01404  |
| OS06G0663600 | 39.55242    | 88.44999    | -1.1611  | 0.00174  |
| OS06G0669400 | 7050.67808  | 5080.45797  | 0.4728   | 0.03007  |
| OS06G0669700 | 578.0017    | 405.59228   | 0.51104  | 0.04124  |

---

---

|              |             |             |          |          |
|--------------|-------------|-------------|----------|----------|
| OS06G0671600 | 27.1347     | 88.98067    | -1.7134  | 1.61E-05 |
| OS06G0672700 | 7.41555     | 30.09588    | -2.0209  | 0.0014   |
| OS06G0673700 | 10.49929    | 34.76737    | -1.7274  | 0.00292  |
| OS06G0673800 | 63.15856    | 160.98889   | -1.3499  | 2.80E-06 |
| OS06G0674000 | 139.87899   | 359.33089   | -1.3611  | 7.18E-05 |
| OS06G0674800 | 212.15958   | 335.65333   | -0.66182 | 0.0125   |
| OS06G0678500 | 1049.90688  | 393.71657   | 1.415    | 2.63E-09 |
| OS06G0680500 | 2481.87291  | 1171.25066  | 1.0834   | 1.94E-08 |
| OS06G0681400 | 20019.58762 | 13230.25221 | 0.59757  | 0.02549  |
| OS06G0681600 | 9.25123     | 32.92419    | -1.8314  | 0.00219  |
| OS06G0682300 | 27.57955    | 53.90634    | -0.96686 | 0.03275  |
| OS06G0687700 | 335.23657   | 493.20289   | -0.557   | 0.02188  |
| OS06G0689600 | 59.18521    | 138.36475   | -1.2252  | 5.02E-05 |
| OS06G0690200 | 207.06723   | 326.54077   | -0.65716 | 0.01454  |
| OS06G0690600 | 17.43488    | 39.45344    | -1.1782  | 0.03362  |
| OS06G0690900 | 20.07633    | 43.37849    | -1.1115  | 0.03676  |
| OS06G0691400 | 412.8816    | 169.0951    | 1.2879   | 0.00178  |
| OS06G0693000 | 97.93064    | 55.80265    | 0.81143  | 0.02907  |
| OS06G0693500 | 74.8019     | 136.12955   | -0.86383 | 0.00644  |
| OS06G0694400 | 197.68546   | 27.57446    | 2.8418   | 3.39E-23 |
| OS06G0694500 | 671.59974   | 385.29043   | 0.80166  | 0.00091  |
| OS06G0695700 | 5.3242      | 24.68104    | -2.2128  | 0.00266  |
| OS06G0697400 | 66.75352    | 123.98642   | -0.89327 | 0.00606  |
| OS06G0699200 | 409.00158   | 618.11431   | -0.59577 | 0.01408  |
| OS06G0699301 | 154.75868   | 309.70588   | -1.0009  | 6.21E-05 |
| OS06G0699400 | 708.98624   | 1170.1454   | -0.72286 | 0.00073  |
| OS06G0699700 | 1631.13058  | 1010.23224  | 0.69119  | 0.00105  |

---

---

|              |             |            |          |          |
|--------------|-------------|------------|----------|----------|
| OS06G0700500 | 63.12596    | 110.27467  | -0.8048  | 0.01994  |
| OS06G0701600 | 891.85079   | 417.7945   | 1.094    | 1.16E-07 |
| OS06G0703300 | 26.91291    | 8.00832    | 1.7487   | 0.00659  |
| OS06G0703500 | 277.24777   | 70.57395   | 1.974    | 9.11E-05 |
| OS06G0703900 | 434.20463   | 293.5493   | 0.56477  | 0.02771  |
| OS06G0704600 | 4450.68877  | 3230.127   | 0.46244  | 0.03842  |
| OS06G0704700 | 5765.50499  | 3775.29032 | 0.61086  | 0.00342  |
| OS06G0705000 | 72.55024    | 32.40676   | 1.1627   | 0.00285  |
| OS06G0705600 | 290.21184   | 95.10244   | 1.6096   | 2.62E-09 |
| OS06G0707200 | 921.93803   | 575.76341  | 0.67919  | 0.0199   |
| OS06G0707800 | 88.19941    | 200.70241  | -1.1862  | 1.45E-05 |
| OS06G0708000 | 124.84227   | 235.60912  | -0.91629 | 0.00043  |
| OS06G0710300 | 666.32209   | 1026.95363 | -0.62408 | 0.00732  |
| OS06G0711100 | 1554.29286  | 1034.90951 | 0.58675  | 0.00604  |
| OS06G0711700 | 807.6132    | 500.77983  | 0.68949  | 0.02071  |
| OS06G0712200 | 597.03005   | 415.68169  | 0.52232  | 0.02565  |
| OS06G0712300 | 2096.33796  | 1467.78842 | 0.51423  | 0.01996  |
| OS06G0714700 | 1183.96124  | 756.06559  | 0.64704  | 0.00221  |
| OS06G0714800 | 7.85785     | 217.17169  | -4.7886  | 4.26E-43 |
| OS06G0714900 | 24.4094     | 8.90499    | 1.4548   | 0.04578  |
| OS06G0715100 | 221.28668   | 135.35363  | 0.70918  | 0.01287  |
| OS06G0716100 | 11300.38209 | 4914.94859 | 1.2011   | 4.14E-11 |
| OS06G0717300 | 13.72836    | 33.65257   | -1.2936  | 0.03276  |
| OS06G0724200 | 15.29466    | 37.70493   | -1.3017  | 0.02025  |
| OS06G0724800 | 201.58482   | 94.47528   | 1.0934   | 0.03643  |
| OS06G0725900 | 8346.63944  | 5264.23    | 0.66497  | 0.00078  |
| OS06G0726200 | 214.49495   | 67.81019   | 1.6614   | 0.0077   |

---



---

|              |            |            |          |          |
|--------------|------------|------------|----------|----------|
| OS06G0728700 | 2832.16051 | 1627.31694 | 0.79941  | 7.87E-05 |
| OS06G0729000 | 616.0938   | 401.12786  | 0.61909  | 0.00923  |
| OS06G0729650 | 2594.36631 | 1738.43011 | 0.5776   | 0.01255  |
| OS06G0730200 | 155.03184  | 94.03313   | 0.72132  | 0.01876  |
| OS06G0730300 | 1966.11615 | 1208.97394 | 0.70157  | 0.00071  |
| OS07G0100200 | 9229.8895  | 5853.50442 | 0.65701  | 0.00767  |
| OS07G0100300 | 4499.17798 | 3169.46411 | 0.50542  | 0.01972  |
| OS07G0100600 | 89.3972    | 38.36678   | 1.2204   | 0.00116  |
| OS07G0100800 | 337.89044  | 156.34814  | 1.1118   | 0.0016   |
| OS07G0101101 | 46.81003   | 83.60083   | -0.8367  | 0.03679  |
| OS07G0103100 | 1969.05001 | 930.11412  | 1.082    | 1.50E-06 |
| OS07G0106200 | 1093.71908 | 3517.59665 | -1.6853  | 1.14E-18 |
| OS07G0107900 | 565.783    | 393.62674  | 0.52342  | 0.03515  |
| OS07G0108800 | 52.54898   | 26.19149   | 1.0046   | 0.03188  |
| OS07G0108900 | 10.11707   | 58.43682   | -2.5301  | 0.012    |
| OS07G0109400 | 58.60867   | 22.64615   | 1.3718   | 0.04039  |
| OS07G0109500 | 457.26274  | 716.00921  | -0.64695 | 0.0056   |
| OS07G0111700 | 119.66713  | 24.80157   | 2.2705   | 5.08E-11 |
| OS07G0111900 | 254.4575   | 13.27339   | 4.2608   | 8.75E-47 |
| OS07G0112100 | 236.54619  | 20.89891   | 3.5006   | 3.70E-35 |
| OS07G0114000 | 172.20736  | 279.70696  | -0.69977 | 0.01278  |
| OS07G0115500 | 332.67978  | 115.14708  | 1.5307   | 6.72E-09 |
| OS07G0116600 | 611.35639  | 1049.75617 | -0.77997 | 0.00024  |
| OS07G0117300 | 32.30729   | 1.55474    | 4.3771   | 2.90E-09 |
| OS07G0120800 | 140.34136  | 221.59926  | -0.65901 | 0.02155  |
| OS07G0121200 | 586.2572   | 254.7508   | 1.2024   | 1.06E-05 |
| OS07G0121750 | 103.01806  | 37.07257   | 1.4745   | 1.23E-05 |

---

---

|              |             |             |          |          |
|--------------|-------------|-------------|----------|----------|
| OS07G0121800 | 381.2095    | 201.81617   | 0.91754  | 8.63E-05 |
| OS07G0122000 | 688.82006   | 353.0567    | 0.96423  | 0.00073  |
| OS07G0122100 | 283.01589   | 109.61897   | 1.3684   | 0.00127  |
| OS07G0123300 | 29.91646    | 61.52997    | -1.0403  | 0.01497  |
| OS07G0123800 | 26.02203    | 129.69451   | -2.3173  | 1.89E-12 |
| OS07G0124100 | 417.92729   | 729.6896    | -0.80403 | 0.00013  |
| OS07G0124500 | 277.13116   | 402.90727   | -0.53988 | 0.04157  |
| OS07G0129100 | 6.4156      | 19.57694    | -1.6095  | 0.0414   |
| OS07G0130100 | 1.51744     | 12.89792    | -3.0874  | 0.0095   |
| OS07G0132500 | 7.0371      | 23.37225    | -1.7317  | 0.01733  |
| OS07G0133100 | 44.16986    | 115.61503   | -1.3882  | 2.43E-05 |
| OS07G0134600 | 23.12369    | 74.55718    | -1.689   | 1.78E-05 |
| OS07G0141400 | 36135.03798 | 23568.98537 | 0.61651  | 0.0449   |
| OS07G0142900 | 1900.47111  | 184.86215   | 3.3618   | 2.65E-63 |
| OS07G0143200 | 277.67384   | 899.83718   | -1.6963  | 3.86E-17 |
| OS07G0143401 | 20.84821    | 51.52507    | -1.3054  | 0.00528  |
| OS07G0148900 | 29047.45129 | 16622.17633 | 0.8053   | 3.04E-05 |
| OS07G0150100 | 2900.84931  | 1749.45763  | 0.72957  | 0.00025  |
| OS07G0150700 | 391.32986   | 698.61325   | -0.83611 | 0.00058  |
| OS07G0152900 | 1626.18043  | 1154.78822  | 0.49386  | 0.02613  |
| OS07G0153400 | 729.3742    | 464.63259   | 0.65057  | 0.0044   |
| OS07G0158900 | 74.22676    | 120.62855   | -0.70056 | 0.04068  |
| OS07G0160300 | 344.99654   | 160.0987    | 1.1076   | 2.80E-06 |
| OS07G0160400 | 8830.68963  | 5227.8814   | 0.7563   | 0.0001   |
| OS07G0162100 | 3176.41342  | 1349.16659  | 1.2353   | 5.63E-06 |
| OS07G0162200 | 5.42193     | 26.28758    | -2.2775  | 0.00096  |
| OS07G0162500 | 1738.27361  | 996.55643   | 0.80263  | 7.03E-05 |

---

---

|              |            |            |          |          |
|--------------|------------|------------|----------|----------|
| OS07G0162600 | 207.72011  | 920.73157  | -2.1481  | 1.76E-10 |
| OS07G0164000 | 31.6432    | 58.65358   | -0.89032 | 0.04993  |
| OS07G0164800 | 292.26921  | 122.37626  | 1.256    | 2.05E-07 |
| OS07G0165200 | 437.12876  | 278.64203  | 0.64965  | 0.00857  |
| OS07G0165650 | 173.18863  | 87.5757    | 0.98374  | 0.00048  |
| OS07G0166600 | 61.04467   | 120.87118  | -0.98553 | 0.00317  |
| OS07G0170100 | 402.42339  | 198.10341  | 1.0225   | 1.11E-05 |
| OS07G0170300 | 110.47985  | 286.78572  | -1.3762  | 1.56E-08 |
| OS07G0171100 | 9348.45496 | 5341.77377 | 0.80741  | 2.62E-05 |
| OS07G0175600 | 118.1022   | 54.24688   | 1.1224   | 0.00057  |
| OS07G0176600 | 25.42434   | 8.09723    | 1.6507   | 0.01678  |
| OS07G0176900 | 3201.9423  | 1684.53068 | 0.9266   | 0.0031   |
| OS07G0177100 | 28.18984   | 66.50101   | -1.2382  | 0.00247  |
| OS07G0177150 | 5.99584    | 22.98235   | -1.9385  | 0.0074   |
| OS07G0178700 | 271.38929  | 57.09591   | 2.2489   | 1.53E-05 |
| OS07G0180900 | 702.49267  | 1058.88224 | -0.59199 | 0.0088   |
| OS07G0181500 | 2643.83338 | 1718.75664 | 0.62127  | 0.00361  |
| OS07G0184300 | 104.37251  | 163.76155  | -0.64985 | 0.03936  |
| OS07G0184800 | 85.41136   | 218.16302  | -1.3529  | 3.05E-07 |
| OS07G0184900 | 26.01324   | 62.29374   | -1.2598  | 0.00259  |
| OS07G0185900 | 2512.62873 | 893.205    | 1.4921   | 7.99E-06 |
| OS07G0186000 | 5862.01777 | 2718.73922 | 1.1085   | 1.84E-05 |
| OS07G0187400 | 3677.08536 | 2532.22126 | 0.53816  | 0.01038  |
| OS07G0188000 | 25.91789   | 0.30688    | 6.4001   | 0.01716  |
| OS07G0188233 | 1094.91174 | 599.65678  | 0.86861  | 2.96E-05 |
| OS07G0188249 | 216.56782  | 123.48577  | 0.81047  | 0.00456  |
| OS07G0188266 | 1146.11858 | 580.47845  | 0.98144  | 1.75E-06 |

---

---

|              |            |            |          |          |
|--------------|------------|------------|----------|----------|
| OS07G0190000 | 3538.71374 | 755.90568  | 2.2269   | 3.88E-14 |
| OS07G0190800 | 87.27719   | 48.3161    | 0.8531   | 0.02958  |
| OS07G0191200 | 76.29297   | 26.52635   | 1.5241   | 0.00021  |
| OS07G0195200 | 98.66231   | 33.83388   | 1.544    | 5.34E-06 |
| OS07G0195300 | 29.58187   | 1.51218    | 4.29     | 0.0315   |
| OS07G0196200 | 2258.95256 | 1443.00463 | 0.64658  | 0.00157  |
| OS07G0200900 | 28.02307   | 63.2974    | -1.1755  | 0.00675  |
| OS07G0202900 | 31.49282   | 73.33698   | -1.2195  | 0.00257  |
| OS07G0204500 | 371.66466  | 229.8249   | 0.69347  | 0.00612  |
| OS07G0204800 | 146.39851  | 91.40403   | 0.67957  | 0.03543  |
| OS07G0204900 | 1718.51803 | 1218.75565 | 0.49576  | 0.0294   |
| OS07G0206700 | 982.15141  | 415.04211  | 1.2427   | 6.58E-10 |
| OS07G0209000 | 408.51077  | 598.01713  | -0.54981 | 0.01834  |
| OS07G0210000 | 371.53601  | 84.55529   | 2.1355   | 2.05E-20 |
| OS07G0211101 | 283.76374  | 155.79913  | 0.865    | 0.00045  |
| OS07G0211200 | 1013.41194 | 624.31011  | 0.69889  | 0.00117  |
| OS07G0211900 | 214.53157  | 135.00238  | 0.66821  | 0.0195   |
| OS07G0212400 | 114.13245  | 1.2053     | 6.5652   | 8.21E-38 |
| OS07G0213800 | 51.66938   | 24.60182   | 1.0705   | 0.02985  |
| OS07G0215200 | 89.06023   | 192.13054  | -1.1092  | 5.08E-05 |
| OS07G0220333 | 22.46966   | 3.53272    | 2.6691   | 0.004    |
| OS07G0220600 | 100.56576  | 158.59015  | -0.65716 | 0.04149  |
| OS07G0222700 | 25.22637   | 60.42644   | -1.2602  | 0.00258  |
| OS07G0224000 | 29.83256   | 59.94763   | -1.0068  | 0.0239   |
| OS07G0224900 | 17.16801   | 59.30431   | -1.7884  | 5.14E-05 |
| OS07G0227300 | 6.14494    | 37.46821   | -2.6082  | 9.18E-06 |
| OS07G0227600 | 1666.74494 | 1092.75964 | 0.60906  | 0.0031   |

---

---

|              |           |           |          |          |
|--------------|-----------|-----------|----------|----------|
| OS07G0227800 | 826.42197 | 443.99735 | 0.89633  | 2.53E-05 |
| OS07G0229800 | 66.29623  | 111.78866 | -0.75378 | 0.03534  |
| OS07G0229900 | 246.09071 | 395.58509 | -0.6848  | 0.0045   |
| OS07G0230400 | 49.65187  | 115.436   | -1.2172  | 0.00021  |
| OS07G0233300 | 31.83111  | 69.49715  | -1.1265  | 0.02079  |
| OS07G0237700 | 43.2752   | 86.68053  | -1.0022  | 0.00786  |
| OS07G0238700 | 324.41874 | 589.98113 | -0.86281 | 0.00011  |
| OS07G0240400 | 98.9418   | 55.00844  | 0.84693  | 0.01997  |
| OS07G0240600 | 406.40675 | 146.74985 | 1.4696   | 8.73E-11 |
| OS07G0241500 | 99.48964  | 17.65628  | 2.4944   | 0.00043  |
| OS07G0241700 | 22.49348  | 4.74913   | 2.2438   | 0.00242  |
| OS07G0242050 | 40.7967   | 94.07643  | -1.2054  | 0.00394  |
| OS07G0245100 | 436.06848 | 227.89106 | 0.93621  | 0.00014  |
| OS07G0245200 | 45.77132  | 108.04515 | -1.2391  | 0.00018  |
| OS07G0249100 | 53.61168  | 133.21044 | -1.3131  | 1.31E-05 |
| OS07G0249600 | 215.62543 | 137.43967 | 0.64973  | 0.02591  |
| OS07G0249800 | 11.86257  | 2.46427   | 2.2672   | 0.04269  |
| OS07G0251200 | 46.2762   | 165.60496 | -1.8394  | 1.61E-10 |
| OS07G0251900 | 0         | 25.83115  |          | 1.51E-09 |
| OS07G0253000 | 80.90291  | 35.10933  | 1.2043   | 0.00126  |
| OS07G0258400 | 3.10629   | 105.10573 | -5.0805  | 0.00723  |
| OS07G0261200 | 176.7148  | 25.74066  | 2.7793   | 2.99E-16 |
| OS07G0262800 | 7.98568   | 22.99883  | -1.5261  | 0.03567  |
| OS07G0263400 | 62.33876  | 0.24957   | 7.9645   | 0.03117  |
| OS07G0273900 | 120.52062 | 202.6032  | -0.74938 | 0.00604  |
| OS07G0274700 | 209.90805 | 69.67371  | 1.5911   | 4.70E-06 |
| OS07G0275475 | 116.99441 | 1.30517   | 6.4861   | 9.04E-38 |

---

---

|              |             |            |          |          |
|--------------|-------------|------------|----------|----------|
| OS07G0283050 | 45.25256    | 21.42777   | 1.0785   | 0.02851  |
| OS07G0283125 | 20.57127    | 7.19307    | 1.516    | 0.04663  |
| OS07G0285200 | 19.42094    | 44.96989   | -1.2113  | 0.01627  |
| OS07G0295000 | 8.08719     | 24.46655   | -1.5971  | 0.02064  |
| OS07G0295400 | 48.25483    | 90.33369   | -0.90459 | 0.01357  |
| OS07G0298900 | 24.18762    | 3.82675    | 2.6601   | 0.00051  |
| OS07G0409900 | 412.64587   | 633.45253  | -0.61833 | 0.00769  |
| OS07G0410700 | 1.16909     | 22.92292   | -4.2933  | 4.22E-06 |
| OS07G0412100 | 10312.63861 | 4792.65773 | 1.1055   | 3.47E-09 |
| OS07G0413800 | 4501.86915  | 449.43226  | 3.3243   | 1.68E-68 |
| OS07G0414000 | 854.05278   | 183.79033  | 2.2163   | 2.95E-07 |
| OS07G0414900 | 19.81816    | 5.87505    | 1.7542   | 0.02136  |
| OS07G0416100 | 3.2379      | 14.02927   | -2.1153  | 0.03157  |
| OS07G0416600 | 12.98658    | 43.21563   | -1.7345  | 0.00078  |
| OS07G0416700 | 43.93686    | 162.58597  | -1.8877  | 1.06E-10 |
| OS07G0418100 | 9.57703     | 48.76353   | -2.3482  | 2.77E-05 |
| OS07G0418500 | 20.58261    | 3.3738     | 2.609    | 0.01232  |
| OS07G0421200 | 200.9963    | 351.70921  | -0.80721 | 0.00097  |
| OS07G0421800 | 258.97955   | 144.19195  | 0.84485  | 0.00078  |
| OS07G0425000 | 735.38199   | 433.63187  | 0.76202  | 0.00166  |
| OS07G0429700 | 13.49524    | 133.97976  | -3.3115  | 0.00373  |
| OS07G0435400 | 145.42611   | 259.39295  | -0.83485 | 0.00171  |
| OS07G0446100 | 846.71313   | 512.79726  | 0.72348  | 0.00098  |
| OS07G0446400 | 58.24899    | 6.79743    | 3.0992   | 0.00219  |
| OS07G0446600 | 224.76484   | 421.15846  | -0.90595 | 0.00017  |
| OS07G0446800 | 384.77616   | 3.87295    | 6.6344   | 9.69E-14 |
| OS07G0448800 | 10534.63122 | 6658.1643  | 0.66194  | 0.00116  |

---

---

|              |            |            |          |          |
|--------------|------------|------------|----------|----------|
| OS07G0450000 | 39.61377   | 91.71824   | -1.2112  | 0.00062  |
| OS07G0450100 | 60.10484   | 19.23325   | 1.6439   | 0.00323  |
| OS07G0452500 | 90.26443   | 152.30565  | -0.75474 | 0.01585  |
| OS07G0452700 | 162.80712  | 249.32728  | -0.61488 | 0.03068  |
| OS07G0454100 | 310.21806  | 210.01226  | 0.56281  | 0.04056  |
| OS07G0458800 | 73.63281   | 129.85925  | -0.81853 | 0.01113  |
| OS07G0463600 | 844.71463  | 452.92505  | 0.89919  | 0.02442  |
| OS07G0463800 | 42.08479   | 6.65884    | 2.66     | 3.21E-07 |
| OS07G0464200 | 7182.74557 | 3364.1963  | 1.0943   | 3.73E-09 |
| OS07G0464600 | 674.60514  | 431.88331  | 0.6434   | 0.00509  |
| OS07G0467200 | 805.07199  | 280.37629  | 1.5218   | 4.76E-14 |
| OS07G0467800 | 34.7345    | 87.8583    | -1.3388  | 0.00023  |
| OS07G0468100 | 2830.32959 | 1808.59851 | 0.6461   | 0.00155  |
| OS07G0470700 | 636.38079  | 406.88655  | 0.64526  | 0.00654  |
| OS07G0471300 | 173.99564  | 322.5006   | -0.89025 | 0.0002   |
| OS07G0474700 | 477.14533  | 699.84894  | -0.55261 | 0.02392  |
| OS07G0475400 | 263.15264  | 115.89571  | 1.1831   | 0.04113  |
| OS07G0475800 | 37.46739   | 68.35916   | -0.8675  | 0.0392   |
| OS07G0476900 | 3673.62119 | 1645.20176 | 1.1589   | 1.03E-05 |
| OS07G0484800 | 2.80681    | 16.07567   | -2.5179  | 0.00715  |
| OS07G0489300 | 690.09173  | 322.9078   | 1.0957   | 3.63E-05 |
| OS07G0490100 | 17.97364   | 4.04298    | 2.1524   | 0.03885  |
| OS07G0491800 | 158.64238  | 19.15711   | 3.0498   | 6.99E-05 |
| OS07G0491900 | 2706.33301 | 1385.46689 | 0.96597  | 3.35E-07 |
| OS07G0493800 | 1.91465    | 32.68187   | -4.0933  | 4.07E-08 |
| OS07G0494800 | 26.39784   | 53.63643   | -1.0228  | 0.02882  |
| OS07G0496200 | 1120.39038 | 800.48221  | 0.48506  | 0.04538  |

---

---

|              |             |             |          |          |
|--------------|-------------|-------------|----------|----------|
| OS07G0498400 | 33.76325    | 234.87499   | -2.7984  | 0.00741  |
| OS07G0499300 | 175.82487   | 343.03863   | -0.96423 | 4.76E-05 |
| OS07G0500300 | 662.1233    | 286.57136   | 1.2082   | 2.05E-06 |
| OS07G0503500 | 350.46273   | 139.0187    | 1.334    | 0.02504  |
| OS07G0506700 | 51.31098    | 95.41926    | -0.89501 | 0.01331  |
| OS07G0507000 | 196.97128   | 527.13667   | -1.4202  | 5.57E-11 |
| OS07G0508500 | 83.47549    | 47.84108    | 0.8031   | 0.04853  |
| OS07G0509700 | 2981.69051  | 1920.51285  | 0.63464  | 0.00163  |
| OS07G0509800 | 18861.39743 | 10298.07333 | 0.87306  | 5.33E-05 |
| OS07G0510100 | 23.30539    | 50.56376    | -1.1174  | 0.02379  |
| OS07G0510200 | 87.06156    | 49.22752    | 0.82257  | 0.03156  |
| OS07G0510400 | 65.97395    | 14.06467    | 2.2298   | 0.04732  |
| OS07G0510500 | 23.59103    | 4.91932     | 2.2617   | 0.04188  |
| OS07G0513000 | 21253.34524 | 11859.74713 | 0.84162  | 6.92E-05 |
| OS07G0513600 | 4.87434     | 19.06858    | -1.9679  | 0.02383  |
| OS07G0515100 | 99.18621    | 245.86858   | -1.3097  | 3.07E-07 |
| OS07G0516300 | 767.04931   | 396.33626   | 0.95259  | 1.52E-05 |
| OS07G0517000 | 116.18122   | 204.31987   | -0.81445 | 0.00359  |
| OS07G0517100 | 388.85504   | 185.31104   | 1.0693   | 3.57E-06 |
| OS07G0520600 | 406.88757   | 221.22456   | 0.87912  | 0.02883  |
| OS07G0524900 | 128.9112    | 22.05785    | 2.547    | 1.26E-05 |
| OS07G0528200 | 0           | 126.29515   |          | 6.27E-38 |
| OS07G0530400 | 530.72895   | 321.98309   | 0.72099  | 0.00184  |
| OS07G0530600 | 335.93941   | 217.48455   | 0.62729  | 0.0135   |
| OS07G0530700 | 100.64472   | 162.73663   | -0.69327 | 0.02729  |
| OS07G0531700 | 80.22005    | 170.64562   | -1.089   | 0.00014  |
| OS07G0537250 | 33.52775    | 13.95911    | 1.2641   | 0.03567  |

---



---

|              |             |             |          |          |
|--------------|-------------|-------------|----------|----------|
| OS07G0537500 | 6.93937     | 249.62956   | -5.1688  | 8.98E-09 |
| OS07G0537600 | 3.5035      | 89.17713    | -4.6698  | 2.31E-06 |
| OS07G0538350 | 4.72524     | 28.72615    | -2.6039  | 9.32E-05 |
| OS07G0538400 | 13.22713    | 43.6741     | -1.7233  | 0.00072  |
| OS07G0539300 | 227.65477   | 103.16499   | 1.1419   | 1.37E-05 |
| OS07G0539900 | 103.26074   | 415.03304   | -2.0069  | 1.12E-09 |
| OS07G0540100 | 401.01741   | 261.09093   | 0.61911  | 0.02344  |
| OS07G0541200 | 229.85896   | 85.29968    | 1.4301   | 1.83E-08 |
| OS07G0541400 | 149.38214   | 259.06905   | -0.79433 | 0.0027   |
| OS07G0542400 | 462.62996   | 6085.07339  | -3.7173  | 7.97E-13 |
| OS07G0542600 | 9.70865     | 381.35815   | -5.2957  | 2.47E-25 |
| OS07G0545300 | 110.54255   | 276.24818   | -1.3214  | 8.48E-08 |
| OS07G0545900 | 405.71283   | 269.20888   | 0.59173  | 0.02296  |
| OS07G0546000 | 176.10681   | 97.72682    | 0.84962  | 0.00361  |
| OS07G0546700 | 238.49104   | 350.30038   | -0.55466 | 0.03505  |
| OS07G0548500 | 271.86373   | 178.39908   | 0.60778  | 0.02772  |
| OS07G0548800 | 390.1574    | 786.16591   | -1.0108  | 1.61E-06 |
| OS07G0549800 | 50.10673    | 90.82724    | -0.85812 | 0.027    |
| OS07G0553700 | 403.07371   | 634.71733   | -0.65507 | 0.00421  |
| OS07G0556200 | 26478.06321 | 15272.94422 | 0.79382  | 2.70E-05 |
| OS07G0556300 | 610.38238   | 415.70266   | 0.55416  | 0.01819  |
| OS07G0557100 | 176.5941    | 272.02428   | -0.6233  | 0.02922  |
| OS07G0558200 | 489.04638   | 334.53723   | 0.5478   | 0.02993  |
| OS07G0558300 | 2016.11183  | 828.12069   | 1.2837   | 9.37E-05 |
| OS07G0558500 | 2108.57057  | 1132.59405  | 0.89663  | 0.00034  |
| OS07G0559400 | 1015.48542  | 571.1446    | 0.83024  | 0.00627  |
| OS07G0559700 | 3990.93438  | 1947.59258  | 1.035    | 0.00225  |

---

---

|              |            |             |          |          |
|--------------|------------|-------------|----------|----------|
| OS07G0561500 | 1802.25848 | 963.32252   | 0.90372  | 0.0002   |
| OS07G0562400 | 28.8752    | 10.96787    | 1.3965   | 0.02485  |
| OS07G0562800 | 7323.20453 | 5059.53376  | 0.53347  | 0.0135   |
| OS07G0563700 | 33.54529   | 101.70832   | -1.6003  | 1.92E-06 |
| OS07G0564200 | 16.17056   | 43.82175    | -1.4383  | 0.0059   |
| OS07G0564500 | 215.98876  | 24.55736    | 3.1367   | 6.83E-29 |
| OS07G0565100 | 202.88598  | 418.93392   | -1.0461  | 4.73E-06 |
| OS07G0566500 | 60.03979   | 20.48474    | 1.5514   | 0.0073   |
| OS07G0568100 | 166.15774  | 257.68497   | -0.63305 | 0.02394  |
| OS07G0568600 | 505.6582   | 337.27671   | 0.58423  | 0.01351  |
| OS07G0569800 | 13.00912   | 78.74276    | -2.5976  | 3.23E-10 |
| OS07G0570100 | 73.24065   | 344.02255   | -2.2318  | 4.17E-15 |
| OS07G0575366 | 95.1088    | 46.28476    | 1.039    | 0.00672  |
| OS07G0575500 | 140.10684  | 73.99591    | 0.92101  | 0.00246  |
| OS07G0576600 | 120.13087  | 61.87564    | 0.95716  | 0.00224  |
| OS07G0577600 | 34824.1388 | 18777.42545 | 0.89109  | 0.03092  |
| OS07G0578200 | 604.40993  | 423.42875   | 0.51341  | 0.03885  |
| OS07G0578333 | 13.4552    | 2.73781     | 2.2971   | 0.0259   |
| OS07G0580500 | 365.56246  | 529.5747    | -0.53472 | 0.03885  |
| OS07G0581300 | 554.32654  | 387.15821   | 0.51781  | 0.04118  |
| OS07G0583200 | 72.99742   | 199.41333   | -1.4498  | 1.24E-07 |
| OS07G0585000 | 1200.39482 | 1990.9834   | -0.72997 | 0.00059  |
| OS07G0585600 | 48.94019   | 91.42799    | -0.90162 | 0.0143   |
| OS07G0586100 | 32.61432   | 8.78289     | 1.8927   | 0.00118  |
| OS07G0587500 | 489.32848  | 319.53174   | 0.61484  | 0.00986  |
| OS07G0588900 | 126.00619  | 213.09764   | -0.75802 | 0.00886  |
| OS07G0589600 | 165.66287  | 65.03912    | 1.3489   | 0.00012  |

---

---

|              |            |            |          |          |
|--------------|------------|------------|----------|----------|
| OS07G0591100 | 123.01402  | 50.23898   | 1.2919   | 3.08E-05 |
| OS07G0592300 | 671.5143   | 430.04243  | 0.64294  | 0.00523  |
| OS07G0595700 | 1387.34423 | 857.09891  | 0.69479  | 0.00091  |
| OS07G0595800 | 41.48834   | 93.73319   | -1.1759  | 0.00124  |
| OS07G0597200 | 168.32015  | 307.14427  | -0.86771 | 0.0019   |
| OS07G0597400 | 97.6712    | 184.55461  | -0.91804 | 0.00129  |
| OS07G0597500 | 48.92647   | 97.91603   | -1.0009  | 0.01031  |
| OS07G0598100 | 66.83621   | 223.2996   | -1.7403  | 3.58E-10 |
| OS07G0598200 | 179.00272  | 327.30328  | -0.87065 | 0.00051  |
| OS07G0599000 | 84.62942   | 180.77971  | -1.095   | 9.86E-05 |
| OS07G0601100 | 0          | 9.112      |          | 0.00242  |
| OS07G0601900 | 31.14448   | 3.63449    | 3.0992   | 1.60E-06 |
| OS07G0603200 | 12.93016   | 53.78597   | -2.0565  | 1.30E-05 |
| OS07G0603800 | 43.56585   | 249.33954  | -2.5168  | 9.30E-10 |
| OS07G0605200 | 2869.80362 | 1928.57156 | 0.57342  | 0.00744  |
| OS07G0605350 | 594.21151  | 79.933     | 2.8941   | 9.73E-33 |
| OS07G0605400 | 1877.9509  | 368.26418  | 2.3503   | 0.00056  |
| OS07G0607400 | 22.24787   | 2.59923    | 3.0975   | 0.03862  |
| OS07G0608100 | 462.97196  | 826.54926  | -0.83618 | 0.00012  |
| OS07G0608900 | 197.6506   | 325.02396  | -0.71759 | 0.00543  |
| OS07G0609000 | 257.0762   | 446.96995  | -0.79798 | 0.00075  |
| OS07G0613500 | 1982.38833 | 1096.42643 | 0.85443  | 0.03489  |
| OS07G0613600 | 1.44225    | 17.37699   | -3.5908  | 0.00055  |
| OS07G0613800 | 207.72389  | 132.66929  | 0.64683  | 0.01917  |
| OS07G0614000 | 1395.69015 | 601.26889  | 1.2149   | 0.02832  |
| OS07G0614250 | 204.77939  | 80.28411   | 1.3509   | 0.01085  |
| OS07G0614300 | 30.05435   | 12.2397    | 1.296    | 0.03314  |

---

---

|              |            |             |          |          |
|--------------|------------|-------------|----------|----------|
| OS07G0614600 | 255.8723   | 497.67982   | -0.95979 | 1.40E-05 |
| OS07G0615200 | 5506.05136 | 2931.79611  | 0.90923  | 0.00374  |
| OS07G0615800 | 88.89852   | 148.25155   | -0.73782 | 0.01831  |
| OS07G0616600 | 155.19344  | 273.50042   | -0.81748 | 0.00237  |
| OS07G0617000 | 62.41551   | 224.26691   | -1.8452  | 4.65E-12 |
| OS07G0617700 | 876.64534  | 475.4264    | 0.88277  | 4.01E-05 |
| OS07G0619200 | 1172.12225 | 626.14143   | 0.90456  | 1.62E-05 |
| OS07G0619400 | 1978.60723 | 821.62995   | 1.2679   | 3.07E-05 |
| OS07G0619800 | 134.06358  | 71.9637     | 0.89758  | 0.00411  |
| OS07G0620500 | 108.47752  | 212.636     | -0.97099 | 0.00028  |
| OS07G0621500 | 148.37456  | 239.58905   | -0.69132 | 0.01031  |
| OS07G0622100 | 492.74659  | 705.4684    | -0.51774 | 0.02888  |
| OS07G0622200 | 267.67033  | 93.34393    | 1.5198   | 0.00023  |
| OS07G0622400 | 22.68517   | 6.29465     | 1.8496   | 0.0104   |
| OS07G0625800 | 148.96849  | 90.7611     | 0.71486  | 0.04457  |
| OS07G0626100 | 44.44552   | 79.59694    | -0.84067 | 0.04045  |
| OS07G0626400 | 2060.62905 | 1284.73697  | 0.68161  | 0.00093  |
| OS07G0628700 | 360.43214  | 86.71473    | 2.0554   | 0.00036  |
| OS07G0628900 | 57.82303   | 17.66392    | 1.7108   | 7.01E-05 |
| OS07G0630800 | 4177.65458 | 2484.43766  | 0.74977  | 0.00013  |
| OS07G0631500 | 53.73934   | 182.59831   | -1.7646  | 4.04E-10 |
| OS07G0631700 | 78.08221   | 140.88429   | -0.85144 | 0.00938  |
| OS07G0636000 | 50.22085   | 134.35354   | -1.4197  | 4.37E-06 |
| OS07G0637200 | 218.74417  | 131.21511   | 0.73731  | 0.04605  |
| OS07G0637300 | 41353.2712 | 25715.63358 | 0.68536  | 0.00069  |
| OS07G0638100 | 762.66918  | 457.19533   | 0.73825  | 0.00052  |
| OS07G0641600 | 32.93384   | 72.19285    | -1.1323  | 0.00391  |

---

---

|              |            |            |          |          |
|--------------|------------|------------|----------|----------|
| OS07G0642200 | 38.01226   | 1.17022    | 5.0216   | 0.00466  |
| OS07G0643100 | 171.87175  | 417.69491  | -1.2811  | 3.27E-08 |
| OS07G0645400 | 1153.77103 | 782.66868  | 0.55988  | 0.01463  |
| OS07G0645500 | 111.48608  | 51.91756   | 1.1026   | 0.00084  |
| OS07G0646100 | 589.6465   | 361.53063  | 0.70573  | 0.03726  |
| OS07G0647300 | 11.18465   | 33.86706   | -1.5984  | 0.0064   |
| OS07G0647900 | 24.30662   | 79.06792   | -1.7017  | 9.45E-06 |
| OS07G0650375 | 4.90066    | 0          |          | 0.03373  |
| OS07G0650600 | 1962.34236 | 3328.9446  | -0.76249 | 9.79E-05 |
| OS07G0654100 | 5.42698    | 32.25485   | -2.5713  | 0.00017  |
| OS07G0656200 | 60.78149   | 18.30528   | 1.7314   | 3.63E-05 |
| OS07G0656700 | 4198.06574 | 2810.12998 | 0.57909  | 0.00488  |
| OS07G0656900 | 148.31681  | 230.91487  | -0.63868 | 0.02588  |
| OS07G0657100 | 26.5846    | 8.45741    | 1.6523   | 0.0089   |
| OS07G0658000 | 895.81229  | 632.65357  | 0.50178  | 0.02852  |
| OS07G0658100 | 216.93619  | 132.33519  | 0.71307  | 0.01154  |
| OS07G0658200 | 65.27739   | 119.58824  | -0.87342 | 0.00886  |
| OS07G0659400 | 6310.26742 | 3067.19558 | 1.0408   | 5.83E-07 |
| OS07G0659900 | 571.44798  | 354.57251  | 0.68854  | 0.00251  |
| OS07G0662800 | 534.70826  | 316.84318  | 0.75498  | 0.00396  |
| OS07G0663700 | 338.99532  | 99.76479   | 1.7647   | 9.09E-09 |
| OS07G0664000 | 182.04237  | 38.47982   | 2.2421   | 0.00015  |
| OS07G0665200 | 439.99944  | 261.14485  | 0.75265  | 0.0395   |
| OS07G0666900 | 346.87716  | 169.28952  | 1.0349   | 1.54E-05 |
| OS07G0667000 | 997.68339  | 642.4811   | 0.63493  | 0.00449  |
| OS07G0667300 | 44.26139   | 103.70341  | -1.2283  | 0.01083  |
| OS07G0668700 | 435.13044  | 260.56252  | 0.73982  | 0.00242  |

---

---

|              |             |            |          |          |
|--------------|-------------|------------|----------|----------|
| OS07G0668900 | 293.53009   | 195.92118  | 0.58324  | 0.03168  |
| OS07G0669700 | 370.37035   | 579.73911  | -0.64644 | 0.00792  |
| OS07G0670300 | 85.29231    | 26.41481   | 1.6911   | 0.00013  |
| OS07G0670600 | 66.23475    | 132.87856  | -1.0044  | 0.00154  |
| OS07G0671000 | 336.66947   | 100.36934  | 1.746    | 0.02778  |
| OS07G0671700 | 253.00269   | 369.57674  | -0.54672 | 0.03945  |
| OS07G0672500 | 1376.28637  | 1997.06794 | -0.5371  | 0.01566  |
| OS07G0673400 | 80.03189    | 138.84869  | -0.79487 | 0.04254  |
| OS07G0673801 | 2.58502     | 17.69498   | -2.7751  | 0.00362  |
| OS07G0673900 | 24.90052    | 124.48447  | -2.3217  | 1.00E-07 |
| OS07G0674200 | 496.75169   | 807.19763  | -0.7004  | 0.00141  |
| OS07G0677200 | 1211.71165  | 4313.69809 | -1.8319  | 0.00108  |
| OS07G0677600 | 2.70908     | 97.47712   | -5.1692  | 4.20E-05 |
| OS07G0678600 | 679.51292   | 1561.08644 | -1.2     | 1.62E-09 |
| OS07G0680000 | 54.72935    | 115.16617  | -1.0733  | 0.00109  |
| OS07G0680400 | 55.13918    | 167.25052  | -1.6009  | 1.43E-08 |
| OS07G0681000 | 172.28251   | 276.41806  | -0.68208 | 0.01172  |
| OS07G0681100 | 387.31765   | 205.25863  | 0.91607  | 0.00012  |
| OS07G0681400 | 1727.74884  | 891.32741  | 0.95487  | 3.58E-06 |
| OS07G0682700 | 98.56471    | 232.79875  | -1.2399  | 0.00286  |
| OS07G0682800 | 119.78478   | 220.21352  | -0.87846 | 0.00157  |
| OS07G0683200 | 53.76446    | 809.29453  | -3.9119  | 0.00014  |
| OS07G0683600 | 49.99278    | 13.63552   | 1.8743   | 5.08E-05 |
| OS07G0685700 | 12385.63391 | 6230.93155 | 0.99115  | 6.17E-06 |
| OS07G0686300 | 1.04504     | 144.32377  | -7.1096  | 6.04E-21 |
| OS07G0687200 | 657.09589   | 1074.73753 | -0.70981 | 0.00139  |
| OS07G0687700 | 675.02473   | 1035.75595 | -0.61767 | 0.0065   |

---

---

|              |            |            |          |          |
|--------------|------------|------------|----------|----------|
| OS07G0687900 | 23.75525   | 211.30986  | -3.153   | 0.03948  |
| OS07G0689300 | 44.31646   | 82.11072   | -0.88973 | 0.02044  |
| OS07G0690900 | 158.03929  | 320.25043  | -1.0189  | 3.10E-05 |
| OS07G0691200 | 3891.15462 | 1511.41737 | 1.3643   | 5.74E-08 |
| OS07G0694000 | 3474.01128 | 2408.13088 | 0.52869  | 0.01463  |
| OS07G0695700 | 200.31199  | 33.56034   | 2.5774   | 1.76E-20 |
| OS08G0100200 | 14.73702   | 72.4004    | -2.2966  | 1.78E-07 |
| OS08G0100300 | 22.12246   | 91.67567   | -2.051   | 1.84E-08 |
| OS08G0101100 | 25.56338   | 5.167      | 2.3067   | 0.0012   |
| OS08G0101700 | 6052.90395 | 3239.23821 | 0.90197  | 2.63E-06 |
| OS08G0103000 | 1181.4004  | 836.87616  | 0.49741  | 0.04094  |
| OS08G0103300 | 343.77586  | 498.07116  | -0.53488 | 0.03917  |
| OS08G0104700 | 132.81157  | 231.61968  | -0.80238 | 0.00319  |
| OS08G0109300 | 3870.6817  | 1437.32092 | 1.4292   | 1.39E-14 |
| OS08G0109400 | 781.13143  | 373.14974  | 1.0658   | 2.77E-07 |
| OS08G0110000 | 826.29006  | 547.78551  | 0.59304  | 0.00945  |
| OS08G0110400 | 1064.35439 | 608.57794  | 0.80646  | 0.00051  |
| OS08G0111200 | 595.84733  | 1228.6844  | -1.0441  | 0.00742  |
| OS08G0111300 | 8.10468    | 54.27226   | -2.7434  | 2.38E-08 |
| OS08G0112700 | 229.35531  | 114.54122  | 1.0017   | 9.37E-05 |
| OS08G0113000 | 2.43592    | 37.76169   | -3.9544  | 9.84E-06 |
| OS08G0113300 | 59.73518   | 110.74804  | -0.89063 | 0.00955  |
| OS08G0113600 | 1.0939     | 13.94588   | -3.6723  | 0.01997  |
| OS08G0114100 | 6457.58793 | 3144.04137 | 1.0384   | 2.81E-08 |
| OS08G0117300 | 502.67592  | 728.47986  | -0.53526 | 0.0216   |
| OS08G0118900 | 781.85183  | 471.38533  | 0.72999  | 0.00074  |
| OS08G0120200 | 30.06683   | 60.45955   | -1.0078  | 0.02187  |

---

---

|              |             |             |          |          |
|--------------|-------------|-------------|----------|----------|
| OS08G0120301 | 63.76738    | 150.95903   | -1.2433  | 0.00032  |
| OS08G0120500 | 201.48228   | 371.99798   | -0.88464 | 0.00023  |
| OS08G0122000 | 1276.57019  | 869.99634   | 0.55319  | 0.01514  |
| OS08G0127100 | 738.78429   | 1558.68057  | -1.0771  | 0.00482  |
| OS08G0127800 | 27.58961    | 64.35094    | -1.2218  | 0.00333  |
| OS08G0128200 | 615.68188   | 271.36091   | 1.182    | 2.93E-08 |
| OS08G0129200 | 142.24077   | 271.55902   | -0.93293 | 0.00024  |
| OS08G0133600 | 42.86538    | 79.63148    | -0.89353 | 0.02572  |
| OS08G0135900 | 1020.94682  | 485.40467   | 1.0726   | 8.12E-08 |
| OS08G0138900 | 6408.40873  | 2197.03703  | 1.5444   | 6.29E-07 |
| OS08G0139100 | 59.64878    | 26.59461    | 1.1654   | 0.00744  |
| OS08G0139700 | 68438.09949 | 20241.47282 | 1.7575   | 1.40E-13 |
| OS08G0140500 | 736.61557   | 333.15833   | 1.1447   | 0.00606  |
| OS08G0143900 | 1975.59605  | 1255.06391  | 0.65453  | 0.00244  |
| OS08G0144000 | 6881.38372  | 3557.13891  | 0.95198  | 5.78E-07 |
| OS08G0150800 | 36.29074    | 105.31104   | -1.537   | 4.01E-06 |
| OS08G0152366 | 3852.62343  | 2199.58187  | 0.80861  | 2.85E-05 |
| OS08G0152700 | 590.984     | 417.00883   | 0.50304  | 0.04602  |
| OS08G0153900 | 69.77226    | 17.15366    | 2.0241   | 0.00067  |
| OS08G0155000 | 73.72048    | 169.36213   | -1.2     | 2.26E-05 |
| OS08G0156600 | 2625.04782  | 957.5488    | 1.4549   | 4.59E-07 |
| OS08G0156800 | 229.77984   | 330.83778   | -0.52587 | 0.044    |
| OS08G0157400 | 426.80234   | 239.14271   | 0.8357   | 0.00035  |
| OS08G0157600 | 68076.56069 | 42795.38606 | 0.6697   | 0.00093  |
| OS08G0158800 | 5.22774     | 33.07941    | -2.6617  | 2.09E-05 |
| OS08G0162100 | 5854.57166  | 3310.09979  | 0.82269  | 3.22E-05 |
| OS08G0163400 | 2261.40973  | 1467.01661  | 0.62434  | 0.00274  |

---



---

|              |             |             |          |          |
|--------------|-------------|-------------|----------|----------|
| OS08G0167800 | 1331.1077   | 3.59003     | 8.5344   | 1.78E-19 |
| OS08G0168000 | 26.37903    | 0           |          | 0.0008   |
| OS08G0169300 | 12.01045    | 0.90953     | 3.723    | 0.01523  |
| OS08G0171700 | 194.03065   | 71.74195    | 1.4354   | 1.17E-07 |
| OS08G0174100 | 900.26722   | 384.02394   | 1.2292   | 0.02025  |
| OS08G0174300 | 332.29963   | 60.24971    | 2.4635   | 0.04663  |
| OS08G0178800 | 5345.95107  | 2648.26415  | 1.0134   | 7.08E-08 |
| OS08G0183900 | 1237.6387   | 650.30762   | 0.9284   | 5.98E-06 |
| OS08G0185701 | 12.3312     | 142.16936   | -3.5272  | 2.30E-23 |
| OS08G0187800 | 1102.41369  | 775.79758   | 0.50691  | 0.03643  |
| OS08G0187900 | 2648.47325  | 1053.85699  | 1.3295   | 8.61E-07 |
| OS08G0189900 | 76.60473    | 409.41942   | -2.4181  | 3.74E-08 |
| OS08G0190100 | 2.81059     | 53.63091    | -4.2541  | 1.98E-13 |
| OS08G0190300 | 290.26081   | 91.92312    | 1.6589   | 5.23E-12 |
| OS08G0191700 | 733.11835   | 312.72979   | 1.2291   | 3.40E-08 |
| OS08G0192300 | 39.03493    | 13.79097    | 1.501    | 0.00387  |
| OS08G0192800 | 582.97806   | 994.07023   | -0.76991 | 0.00042  |
| OS08G0197500 | 57.35946    | 103.65295   | -0.85366 | 0.01551  |
| OS08G0199000 | 36.51504    | 65.98507    | -0.85365 | 0.04476  |
| OS08G0200300 | 64157.89247 | 36235.39074 | 0.82423  | 4.20E-05 |
| OS08G0200500 | 50.18825    | 150.233     | -1.5818  | 7.38E-08 |
| OS08G0200750 | 10.44665    | 27.14917    | -1.3779  | 0.03749  |
| OS08G0201500 | 10.34263    | 61.56347    | -2.5735  | 9.89E-09 |
| OS08G0201700 | 2.51361     | 22.25359    | -3.1462  | 0.00497  |
| OS08G0202300 | 2399.37556  | 8500.08889  | -1.8248  | 5.90E-14 |
| OS08G0203100 | 8.6811      | 79.63691    | -3.1975  | 3.54E-08 |
| OS08G0203150 | 3.88195     | 22.33509    | -2.5245  | 0.00588  |

---

---

|              |            |             |          |           |
|--------------|------------|-------------|----------|-----------|
| OS08G0203201 | 2.48729    | 38.41069    | -3.9489  | 8.27E-09  |
| OS08G0203300 | 17.56649   | 85.20154    | -2.2781  | 3.11E-09  |
| OS08G0203400 | 22.54715   | 5811.41491  | -8.0098  | 3.33E-147 |
| OS08G0203600 | 307.88702  | 2481.1063   | -3.0105  | 1.50E-42  |
| OS08G0203900 | 47.74978   | 94.4432     | -0.98395 | 0.00722   |
| OS08G0204632 | 8.45681    | 23.96204    | -1.5026  | 0.04054   |
| OS08G0205300 | 23.77402   | 51.97992    | -1.1286  | 0.01855   |
| OS08G0205800 | 157.39988  | 78.28255    | 1.0077   | 0.01791   |
| OS08G0205900 | 376.10314  | 111.59332   | 1.7529   | 0.00233   |
| OS08G0221300 | 1627.59185 | 698.1495    | 1.2211   | 3.95E-10  |
| OS08G0224800 | 103.65451  | 45.2733     | 1.1951   | 0.00031   |
| OS08G0225050 | 37.11022   | 74.16122    | -0.99885 | 0.0147    |
| OS08G0230300 | 126.45749  | 77.10658    | 0.71373  | 0.03681   |
| OS08G0230800 | 260.89736  | 14.82434    | 4.1374   | 9.88E-10  |
| OS08G0231100 | 320.07835  | 164.54088   | 0.95998  | 6.82E-05  |
| OS08G0231400 | 166.31052  | 12870.93028 | -6.2741  | 4.87E-84  |
| OS08G0233400 | 415.19107  | 225.12127   | 0.88307  | 0.00017   |
| OS08G0233600 | 518.0475   | 330.24029   | 0.64957  | 0.00618   |
| OS08G0235550 | 156.00038  | 258.92978   | -0.73101 | 0.00931   |
| OS08G0235800 | 180.97103  | 356.87046   | -0.97964 | 0.00146   |
| OS08G0237200 | 1878.31587 | 1256.12686  | 0.58046  | 0.00608   |
| OS08G0241600 | 287.49155  | 116.36224   | 1.3049   | 9.69E-08  |
| OS08G0241900 | 99.04441   | 48.6728     | 1.025    | 0.00325   |
| OS08G0242700 | 4164.06737 | 2871.72377  | 0.53608  | 0.01348   |
| OS08G0243500 | 3812.49485 | 1832.41767  | 1.057    | 3.19E-08  |
| OS08G0244400 | 27.16607   | 54.40525    | -1.0019  | 0.03418   |
| OS08G0246700 | 193.09443  | 312.49531   | -0.69453 | 0.00571   |

---

---

|              |            |            |          |          |
|--------------|------------|------------|----------|----------|
| OS08G0246800 | 635.01872  | 961.39959  | -0.59834 | 0.00698  |
| OS08G0247600 | 2529.73017 | 1596.72765 | 0.66387  | 0.02078  |
| OS08G0249000 | 1857.45949 | 950.46478  | 0.96663  | 7.81E-07 |
| OS08G0250900 | 7801.28232 | 4768.22604 | 0.71026  | 0.00026  |
| OS08G0255500 | 225.82521  | 339.32209  | -0.58745 | 0.02446  |
| OS08G0256000 | 59.94949   | 109.27229  | -0.86611 | 0.0171   |
| OS08G0256700 | 3.48096    | 61.16609   | -4.1352  | 2.06E-14 |
| OS08G0260600 | 34.85227   | 457.65732  | -3.7149  | 1.17E-10 |
| OS08G0263100 | 32.78232   | 3.57718    | 3.196    | 0.0285   |
| OS08G0266300 | 784.9604   | 552.65627  | 0.50624  | 0.04019  |
| OS08G0266400 | 236.13289  | 154.31382  | 0.61373  | 0.03309  |
| OS08G0268900 | 39.67269   | 79.47815   | -1.0024  | 0.01038  |
| OS08G0269500 | 205.21891  | 85.32056   | 1.2662   | 2.14E-06 |
| OS08G0269600 | 408.75594  | 100.75361  | 2.0204   | 2.79E-14 |
| OS08G0269700 | 840.16814  | 299.15954  | 1.4898   | 4.90E-05 |
| OS08G0269800 | 808.40896  | 553.67735  | 0.54604  | 0.01696  |
| OS08G0270500 | 473.82941  | 156.47878  | 1.5984   | 2.40E-13 |
| OS08G0276100 | 1867.89312 | 1191.97505 | 0.64806  | 0.00657  |
| OS08G0277200 | 136.79019  | 20.43507   | 2.7428   | 2.19E-15 |
| OS08G0280200 | 30.48909   | 78.42143   | -1.363   | 0.00303  |
| OS08G0280600 | 20.14523   | 5.72708    | 1.8146   | 0.02124  |
| OS08G0288000 | 2147.09504 | 1494.94385 | 0.52229  | 0.01972  |
| OS08G0288200 | 861.1081   | 608.33326  | 0.50133  | 0.04207  |
| OS08G0289000 | 154.25643  | 245.89648  | -0.67272 | 0.01908  |
| OS08G0290400 | 452.6227   | 297.9273   | 0.60335  | 0.01544  |
| OS08G0292400 | 118.86142  | 73.147     | 0.70041  | 0.04073  |
| OS08G0295300 | 134.60081  | 270.89031  | -1.009   | 5.41E-05 |

---

---

|              |            |            |          |          |
|--------------|------------|------------|----------|----------|
| OS08G0296900 | 1750.25189 | 1082.78512 | 0.69282  | 0.00094  |
| OS08G0300200 | 727.53241  | 515.94403  | 0.4958   | 0.04646  |
| OS08G0300700 | 52.48512   | 99.99443   | -0.92994 | 0.00935  |
| OS08G0313200 | 594.09016  | 411.27593  | 0.53058  | 0.03049  |
| OS08G0318400 | 107.8924   | 186.473    | -0.78937 | 0.00722  |
| OS08G0319900 | 152.32659  | 229.81112  | -0.59328 | 0.04428  |
| OS08G0320000 | 126.12536  | 242.52189  | -0.94326 | 0.00028  |
| OS08G0323400 | 1073.61777 | 614.33407  | 0.80539  | 0.00528  |
| OS08G0323600 | 46.63716   | 94.66684   | -1.0214  | 0.00373  |
| OS08G0326900 | 375.22122  | 214.64536  | 0.80579  | 0.00077  |
| OS08G0337100 | 34.37354   | 65.71162   | -0.93485 | 0.03896  |
| OS08G0337700 | 50.04042   | 166.32689  | -1.7329  | 9.25E-10 |
| OS08G0337800 | 4.3318     | 35.32193   | -3.0275  | 1.33E-06 |
| OS08G0338000 | 108.51756  | 282.90937  | -1.3824  | 1.76E-08 |
| OS08G0338700 | 42.32297   | 101.89522  | -1.2676  | 0.00018  |
| OS08G0347200 | 20.87075   | 67.06668   | -1.6841  | 4.26E-05 |
| OS08G0351200 | 1.88833    | 14.9407    | -2.9841  | 0.00492  |
| OS08G0351300 | 60.00969   | 413.6401   | -2.7851  | 1.19E-05 |
| OS08G0355400 | 755.58362  | 2457.18998 | -1.7013  | 6.51E-06 |
| OS08G0355500 | 744.53033  | 1068.52332 | -0.52122 | 0.02258  |
| OS08G0356700 | 279.38709  | 37.47562   | 2.8982   | 1.27E-12 |
| OS08G0357000 | 74.17789   | 172.98069  | -1.2215  | 1.26E-05 |
| OS08G0359500 | 313.45452  | 505.35547  | -0.68904 | 0.0029   |
| OS08G0363000 | 77.04486   | 123.9418   | -0.68589 | 0.04925  |
| OS08G0364900 | 1966.71263 | 869.53411  | 1.1775   | 0.03118  |
| OS08G0365900 | 16.61413   | 41.68138   | -1.327   | 0.0111   |
| OS08G0374800 | 1214.82875 | 752.77289  | 0.69047  | 0.00502  |

---

---

|              |             |            |          |          |
|--------------|-------------|------------|----------|----------|
| OS08G0375400 | 42.06212    | 4.22602    | 3.3151   | 0.00204  |
| OS08G0378000 | 227.65805   | 722.61161  | -1.6664  | 5.33E-10 |
| OS08G0384000 | 56.74046    | 104.26104  | -0.87775 | 0.01173  |
| OS08G0384500 | 200.88211   | 787.31065  | -1.9706  | 6.03E-21 |
| OS08G0385000 | 784.686     | 326.61728  | 1.2645   | 7.61E-10 |
| OS08G0386800 | 4429.56231  | 2630.68225 | 0.75173  | 0.00014  |
| OS08G0387500 | 1221.32603  | 817.21424  | 0.57966  | 0.00896  |
| OS08G0387700 | 20.02496    | 52.46756   | -1.3896  | 0.00255  |
| OS08G0389700 | 6290.95716  | 3769.19712 | 0.73902  | 0.00339  |
| OS08G0392100 | 836.43763   | 423.78852  | 0.98091  | 0.00012  |
| OS08G0401100 | 22.0173     | 53.9188    | -1.2922  | 0.00513  |
| OS08G0407200 | 3573.56367  | 1488.51077 | 1.2635   | 1.91E-11 |
| OS08G0407600 | 11580.17087 | 5051.40998 | 1.1969   | 1.88E-06 |
| OS08G0409100 | 1283.47013  | 829.51164  | 0.62972  | 0.04978  |
| OS08G0409500 | 15.58043    | 46.99194   | -1.5927  | 0.0042   |
| OS08G0410500 | 106.40494   | 46.28981   | 1.2008   | 0.00031  |
| OS08G0411200 | 285.23211   | 180.8419   | 0.65741  | 0.01393  |
| OS08G0412800 | 14.53034    | 1.60094    | 3.1821   | 0.0021   |
| OS08G0416000 | 1990.89466  | 5917.03737 | -1.5715  | 0.00012  |
| OS08G0416250 | 14.44887    | 33.28263   | -1.2038  | 0.04433  |
| OS08G0416900 | 74.83073    | 135.29381  | -0.85439 | 0.00819  |
| OS08G0424500 | 602.64775   | 290.78383  | 1.0514   | 1.36E-06 |
| OS08G0425500 | 113.11603   | 24.35225   | 2.2157   | 0.03662  |
| OS08G0425800 | 969.50006   | 543.85297  | 0.83402  | 8.02E-05 |
| OS08G0428200 | 0.77188     | 38.36527   | -5.6353  | 3.05E-05 |
| OS08G0428400 | 638.5396    | 949.70504  | -0.5727  | 0.01761  |
| OS08G0428900 | 3863.00698  | 1940.76371 | 0.9931   | 2.89E-07 |

---

---

|              |             |            |          |          |
|--------------|-------------|------------|----------|----------|
| OS08G0432500 | 3124.82199  | 1737.24847 | 0.84697  | 1.27E-05 |
| OS08G0433600 | 888.69473   | 604.13966  | 0.55681  | 0.01347  |
| OS08G0434100 | 15.86858    | 4.24825    | 1.9012   | 0.03566  |
| OS08G0434500 | 52.22573    | 0          |          | 3.20E-11 |
| OS08G0434632 | 72.60646    | 3.64923    | 4.3144   | 1.06E-05 |
| OS08G0434700 | 672.78681   | 425.66434  | 0.66043  | 0.00319  |
| OS08G0435800 | 49.27732    | 94.75182   | -0.94323 | 0.00822  |
| OS08G0436800 | 225.05205   | 388.53549  | -0.78779 | 0.00094  |
| OS08G0437300 | 45.85279    | 83.18894   | -0.85938 | 0.02329  |
| OS08G0438600 | 54.48239    | 154.63095  | -1.505   | 2.25E-07 |
| OS08G0440800 | 14356.34461 | 8368.10457 | 0.77872  | 6.35E-05 |
| OS08G0441100 | 275.87293   | 125.17705  | 1.14     | 0.00885  |
| OS08G0448000 | 31.48649    | 94.62633   | -1.5875  | 1.72E-05 |
| OS08G0450200 | 6.71758     | 21.1577    | -1.6552  | 0.04606  |
| OS08G0451200 | 341.85387   | 219.37399  | 0.63999  | 0.01424  |
| OS08G0452900 | 19.03252    | 283.47947  | -3.8967  | 6.70E-13 |
| OS08G0453700 | 70.81216    | 133.47584  | -0.91451 | 0.00348  |
| OS08G0455800 | 529.8993    | 269.02041  | 0.978    | 1.04E-05 |
| OS08G0457600 | 4842.44264  | 1959.16497 | 1.3055   | 1.25E-12 |
| OS08G0457901 | 24.44689    | 5.64944    | 2.1135   | 0.01521  |
| OS08G0458200 | 65.20483    | 28.65788   | 1.186    | 0.0044   |
| OS08G0460800 | 311.35094   | 208.02129  | 0.58181  | 0.03035  |
| OS08G0463500 | 103.32242   | 56.82522   | 0.86255  | 0.01163  |
| OS08G0464950 | 60.00091    | 143.41675  | -1.2572  | 3.02E-05 |
| OS08G0465700 | 2044.5755   | 3213.44181 | -0.65232 | 0.04489  |
| OS08G0465800 | 3163.68325  | 1201.59672 | 1.3967   | 1.62E-10 |
| OS08G0466200 | 116.41574   | 1.65825    | 6.1335   | 1.64E-21 |

---

---

|              |            |            |          |          |
|--------------|------------|------------|----------|----------|
| OS08G0468100 | 8276.13361 | 2640.32442 | 1.6482   | 4.79E-09 |
| OS08G0469600 | 32.12808   | 66.03308   | -1.0394  | 0.01358  |
| OS08G0470200 | 68.86614   | 32.69527   | 1.0747   | 0.008    |
| OS08G0470700 | 399.30102  | 144.29693  | 1.4684   | 3.79E-05 |
| OS08G0472400 | 49.39267   | 23.47401   | 1.0732   | 0.03461  |
| OS08G0472800 | 140.76855  | 44.21083   | 1.6709   | 4.44E-08 |
| OS08G0474800 | 198.56194  | 33.71752   | 2.558    | 0.00156  |
| OS08G0475100 | 334.9339   | 118.05264  | 1.5044   | 4.21E-08 |
| OS08G0475400 | 153.84013  | 238.2116   | -0.63081 | 0.02747  |
| OS08G0476100 | 98.576     | 256.09826  | -1.3774  | 0.02407  |
| OS08G0476300 | 121.45905  | 765.30966  | -2.6556  | 3.08E-06 |
| OS08G0477500 | 183.62001  | 62.00948   | 1.5662   | 0.00138  |
| OS08G0478700 | 5133.5922  | 3338.3411  | 0.62084  | 0.02     |
| OS08G0481100 | 35.80586   | 120.05365  | -1.7454  | 9.38E-08 |
| OS08G0481400 | 1215.53731 | 1902.03265 | -0.64595 | 0.0022   |
| OS08G0481700 | 64.55938   | 115.35473  | -0.83738 | 0.01728  |
| OS08G0482300 | 35.17667   | 87.16705   | -1.3092  | 0.00035  |
| OS08G0483100 | 70.71053   | 27.09912   | 1.3837   | 0.02829  |
| OS08G0483900 | 11.83753   | 1.46598    | 3.0134   | 0.00913  |
| OS08G0484200 | 71.78587   | 219.41713  | -1.6119  | 2.26E-06 |
| OS08G0485700 | 409.16847  | 613.86594  | -0.58523 | 0.01888  |
| OS08G0487100 | 142.20582  | 86.29986   | 0.72055  | 0.03117  |
| OS08G0487800 | 70.28712   | 114.10308  | -0.69901 | 0.04998  |
| OS08G0489300 | 3453.07478 | 1305.85923 | 1.4029   | 1.05E-08 |
| OS08G0492400 | 66.0243    | 130.23221  | -0.98002 | 0.00268  |
| OS08G0493900 | 62.44188   | 103.66005  | -0.73127 | 0.04198  |
| OS08G0495500 | 1223.50949 | 1859.95799 | -0.60424 | 0.00511  |

---

---

|              |            |            |          |          |
|--------------|------------|------------|----------|----------|
| OS08G0498100 | 1551.54654 | 2188.85032 | -0.49647 | 0.03132  |
| OS08G0499300 | 13.42888   | 200.36961  | -3.8993  | 2.49E-06 |
| OS08G0499532 | 115.10115  | 177.26     | -0.62296 | 0.04592  |
| OS08G0500000 | 70.98381   | 133.2813   | -0.90891 | 0.00409  |
| OS08G0501500 | 40.04235   | 74.94714   | -0.90435 | 0.02217  |
| OS08G0501700 | 0.79442    | 39.05417   | -5.6194  | 4.48E-12 |
| OS08G0508600 | 38.23044   | 79.9702    | -1.0647  | 0.00541  |
| OS08G0508800 | 239.45577  | 1455.41668 | -2.6036  | 1.79E-12 |
| OS08G0509100 | 1007.0061  | 1700.51367 | -0.7559  | 0.02432  |
| OS08G0510700 | 1749.32686 | 1169.2176  | 0.58126  | 0.00609  |
| OS08G0512400 | 541.94628  | 787.71851  | -0.53953 | 0.02596  |
| OS08G0515800 | 45.28503   | 92.43165   | -1.0294  | 0.00526  |
| OS08G0517200 | 638.73493  | 1365.64366 | -1.0963  | 2.92E-08 |
| OS08G0517500 | 151.96691  | 368.33952  | -1.2773  | 3.90E-08 |
| OS08G0518200 | 10.51806   | 32.41779   | -1.6239  | 0.00721  |
| OS08G0519800 | 595.67205  | 897.61435  | -0.59158 | 0.00911  |
| OS08G0520700 | 379.0651   | 1018.82562 | -1.4264  | 7.81E-13 |
| OS08G0521800 | 3130.29311 | 2035.28973 | 0.62106  | 0.00263  |
| OS08G0524100 | 1047.94104 | 624.5769   | 0.74661  | 0.00067  |
| OS08G0526400 | 374.40652  | 680.29014  | -0.86154 | 0.01252  |
| OS08G0527700 | 4.34679    | 26.75125   | -2.6216  | 0.02314  |
| OS08G0530300 | 517.97115  | 886.81864  | -0.77577 | 0.00038  |
| OS08G0530801 | 13.73592   | 1.61205    | 3.091    | 0.00357  |
| OS08G0531000 | 10.96286   | 0.86334    | 3.6666   | 0.01189  |
| OS08G0531900 | 59.29266   | 1.9429     | 4.9316   | 0.00416  |
| OS08G0535600 | 10.67599   | 41.47816   | -1.958   | 0.00022  |
| OS08G0535700 | 35.87714   | 107.21003  | -1.5793  | 2.30E-06 |

---



---

|              |            |            |          |          |
|--------------|------------|------------|----------|----------|
| OS08G0535900 | 26.30274   | 56.17047   | -1.0946  | 0.02092  |
| OS08G0536000 | 284.57198  | 436.64561  | -0.61767 | 0.01182  |
| OS08G0536300 | 52.35491   | 180.42027  | -1.785   | 2.45E-07 |
| OS08G0537001 | 399.54151  | 266.91985  | 0.58194  | 0.02499  |
| OS08G0537900 | 98.36033   | 159.43361  | -0.69681 | 0.02273  |
| OS08G0538000 | 106.75333  | 247.51516  | -1.2132  | 1.30E-06 |
| OS08G0538600 | 1864.20514 | 765.98317  | 1.2832   | 2.58E-11 |
| OS08G0539600 | 0          | 6.04682    |          | 0.02906  |
| OS08G0539700 | 38.99612   | 648.68497  | -4.0561  | 5.37E-14 |
| OS08G0540000 | 20.18905   | 44.97155   | -1.1554  | 0.04829  |
| OS08G0542000 | 175.42035  | 273.63649  | -0.64144 | 0.01665  |
| OS08G0547800 | 52.76456   | 100.87281  | -0.9349  | 0.00809  |
| OS08G0547900 | 765.30034  | 435.32887  | 0.81392  | 0.00156  |
| OS08G0548400 | 246.43522  | 152.34367  | 0.69388  | 0.00821  |
| OS08G0548500 | 0          | 6.29639    |          | 0.0234   |
| OS08G0549100 | 5745.57655 | 3851.06683 | 0.57719  | 0.00562  |
| OS08G0549200 | 13.68455   | 61.41852   | -2.1661  | 0.00054  |
| OS08G0549950 | 325.25853  | 211.91473  | 0.6181   | 0.015    |
| OS08G0555300 | 19.3984    | 50.5494    | -1.3818  | 0.00297  |
| OS08G0556200 | 221.57985  | 95.89784   | 1.2083   | 0.0018   |
| OS08G0556400 | 89.10808   | 26.90339   | 1.7278   | 0.00258  |
| OS08G0557400 | 870.2939   | 618.03443  | 0.49382  | 0.04734  |
| OS08G0557500 | 126.88098  | 195.30412  | -0.62225 | 0.03941  |
| OS08G0557700 | 119.20734  | 250.20237  | -1.0696  | 0.0001   |
| OS08G0558200 | 2838.71447 | 1117.99615 | 1.3443   | 6.28E-13 |
| OS08G0558300 | 52.45252   | 14.05529   | 1.8999   | 2.91E-05 |
| OS08G0559200 | 377.49018  | 554.03627  | -0.55354 | 0.02082  |

---

---

|              |            |            |          |          |
|--------------|------------|------------|----------|----------|
| OS08G0559400 | 895.05634  | 1371.21154 | -0.6154  | 0.00507  |
| OS08G0559501 | 1.39338    | 14.97404   | -3.4258  | 0.00257  |
| OS08G0560000 | 28.4655    | 473.72952  | -4.0568  | 1.52E-13 |
| OS08G0562100 | 2135.15916 | 1401.51651 | 0.60735  | 0.00448  |
| OS08G0562300 | 3.2078     | 45.52052   | -3.8269  | 1.21E-05 |
| OS08G0562600 | 446.17302  | 780.28382  | -0.8064  | 0.00841  |
| OS08G0562800 | 216.06022  | 85.82885   | 1.3319   | 2.61E-07 |
| OS08G0564700 | 53.50389   | 97.37343   | -0.86388 | 0.0115   |
| OS08G0566400 | 608.41018  | 413.31959  | 0.55779  | 0.01853  |
| OS08G0566600 | 7438.85844 | 4348.72033 | 0.77449  | 7.61E-05 |
| OS08G0566900 | 276.55241  | 446.60216  | -0.69144 | 0.0036   |
| OS09G0101100 | 125.91992  | 207.07872  | -0.71767 | 0.01358  |
| OS09G0109800 | 1124.34252 | 630.24433  | 0.8351   | 7.48E-05 |
| OS09G0111800 | 1131.2375  | 751.49514  | 0.59007  | 0.00781  |
| OS09G0115500 | 1730.15998 | 854.17528  | 1.0183   | 0.00711  |
| OS09G0116400 | 130.16397  | 204.12822  | -0.64915 | 0.0256   |
| OS09G0123300 | 137.58707  | 260.88297  | -0.92306 | 0.0003   |
| OS09G0124850 | 0          | 108.0722   |          | 8.77E-19 |
| OS09G0130300 | 18.00752   | 43.83822   | -1.2836  | 0.01331  |
| OS09G0130700 | 56.35208   | 99.90802   | -0.82613 | 0.02079  |
| OS09G0130800 | 2483.53021 | 1664.35821 | 0.57743  | 0.00826  |
| OS09G0132600 | 191.51169  | 290.97176  | -0.60345 | 0.02345  |
| OS09G0133700 | 48.1571    | 90.31682   | -0.90725 | 0.01417  |
| OS09G0133800 | 139.7922   | 264.57226  | -0.92038 | 0.00046  |
| OS09G0135501 | 92.71802   | 151.43942  | -0.70782 | 0.02571  |
| OS09G0135700 | 291.63916  | 645.42542  | -1.1461  | 0.02136  |
| OS09G0240200 | 3107.11289 | 1525.29818 | 1.0265   | 5.95E-08 |

---

---

|              |            |            |          |          |
|--------------|------------|------------|----------|----------|
| OS09G0240500 | 2046.61506 | 1451.54531 | 0.49565  | 0.03305  |
| OS09G0246200 | 25.29778   | 59.988     | -1.2457  | 0.00369  |
| OS09G0249900 | 358.27712  | 232.0191   | 0.62683  | 0.01439  |
| OS09G0250700 | 1581.25937 | 709.4158   | 1.1564   | 2.75E-09 |
| OS09G0258000 | 3612.70625 | 2050.37159 | 0.81719  | 3.25E-05 |
| OS09G0268800 | 0          | 7.77349    |          | 0.00737  |
| OS09G0272000 | 4452.35816 | 1406.20765 | 1.6628   | 1.11E-05 |
| OS09G0272200 | 809.40916  | 399.29492  | 1.0194   | 8.46E-07 |
| OS09G0272900 | 110.32692  | 1585.95467 | -3.8455  | 7.22E-37 |
| OS09G0274900 | 22.65379   | 231.5932   | -3.3538  | 4.21E-30 |
| OS09G0279600 | 171.84298  | 261.19325  | -0.60403 | 0.02326  |
| OS09G0287000 | 0.39721    | 24.7106    | -5.9591  | 3.79E-08 |
| OS09G0294000 | 1710.2678  | 276.76129  | 2.6275   | 0.01237  |
| OS09G0297400 | 169.6488   | 278.52776  | -0.71527 | 0.007    |
| OS09G0298200 | 65.81004   | 24.0136    | 1.4545   | 0.02888  |
| OS09G0299300 | 57.47469   | 21.4943    | 1.419    | 0.00093  |
| OS09G0306400 | 950.44265  | 480.54759  | 0.98392  | 2.29E-06 |
| OS09G0308900 | 121.75352  | 208.83267  | -0.77838 | 0.00503  |
| OS09G0309500 | 1093.94899 | 449.73399  | 1.2824   | 6.29E-11 |
| OS09G0309700 | 318.78122  | 192.36993  | 0.72868  | 0.00523  |
| OS09G0309900 | 103.42143  | 196.53292  | -0.92624 | 0.00102  |
| OS09G0313500 | 217.78356  | 332.33989  | -0.60976 | 0.02119  |
| OS09G0313550 | 8.95175    | 27.79628   | -1.6346  | 0.0116   |
| OS09G0315000 | 3239.34542 | 2023.97212 | 0.67851  | 0.00091  |
| OS09G0317700 | 2.33819    | 14.36564   | -2.6192  | 0.01325  |
| OS09G0318600 | 21.07377   | 48.54155   | -1.2038  | 0.01071  |
| OS09G0319800 | 0.69669    | 164.01629  | -7.8791  | 1.05E-08 |

---

---

|              |            |            |          |          |
|--------------|------------|------------|----------|----------|
| OS09G0322400 | 1.58885    | 16.36033   | -3.3641  | 0.00087  |
| OS09G0322500 | 3.57869    | 24.06902   | -2.7497  | 0.00028  |
| OS09G0325700 | 1552.2227  | 600.19002  | 1.3708   | 2.19E-05 |
| OS09G0327300 | 103.15851  | 181.30716  | -0.81357 | 0.00439  |
| OS09G0327550 | 42.73139   | 77.47771   | -0.85849 | 0.03529  |
| OS09G0328600 | 0          | 7.01003    |          | 0.01254  |
| OS09G0332600 | 139.99917  | 80.91442   | 0.79095  | 0.01237  |
| OS09G0334500 | 882.06268  | 1541.5907  | -0.80547 | 0.00818  |
| OS09G0337300 | 69.3874    | 152.33815  | -1.1345  | 0.00015  |
| OS09G0339000 | 272.30175  | 1045.52674 | -1.941   | 2.55E-12 |
| OS09G0343200 | 22.00104   | 345.45622  | -3.9729  | 7.27E-23 |
| OS09G0344800 | 2761.62918 | 1023.53811 | 1.432    | 6.95E-05 |
| OS09G0345300 | 248.06306  | 473.90106  | -0.93388 | 2.67E-05 |
| OS09G0346600 | 5.41815    | 92.71228   | -4.0969  | 4.60E-20 |
| OS09G0346900 | 39.99977   | 73.21518   | -0.87215 | 0.04663  |
| OS09G0350900 | 4.87562    | 149.44044  | -4.9378  | 3.61E-27 |
| OS09G0351700 | 4.71768    | 200.84554  | -5.4119  | 1.13E-30 |
| OS09G0351800 | 1.24428    | 40.62215   | -5.0289  | 6.16E-12 |
| OS09G0353200 | 116.66475  | 212.33795  | -0.86399 | 0.00503  |
| OS09G0356000 | 45.30648   | 21.81214   | 1.0546   | 0.04331  |
| OS09G0359800 | 18.13285   | 47.88711   | -1.401   | 0.0031   |
| OS09G0360400 | 558.10423  | 324.12718  | 0.78397  | 0.00039  |
| OS09G0362500 | 445.60742  | 285.60792  | 0.64174  | 0.00828  |
| OS09G0364000 | 28.4028    | 74.87525   | -1.3985  | 0.00031  |
| OS09G0365300 | 362.71571  | 186.46138  | 0.95996  | 7.32E-05 |
| OS09G0367900 | 6235.07252 | 4543.37245 | 0.45664  | 0.04127  |
| OS09G0371000 | 215.57061  | 483.65337  | -1.1658  | 0.0055   |

---

---

|              |            |            |          |          |
|--------------|------------|------------|----------|----------|
| OS09G0372900 | 322.63446  | 219.65282  | 0.55468  | 0.0343   |
| OS09G0375900 | 470.86621  | 288.40555  | 0.70722  | 0.004    |
| OS09G0376300 | 3736.96924 | 1689.17318 | 1.1456   | 9.67E-10 |
| OS09G0376350 | 879.76323  | 369.77251  | 1.2505   | 9.66E-09 |
| OS09G0376700 | 119.62082  | 38.90691   | 1.6204   | 2.26E-07 |
| OS09G0376900 | 387.60033  | 670.78601  | -0.79128 | 0.00371  |
| OS09G0378300 | 83.56567   | 214.75028  | -1.3617  | 1.63E-07 |
| OS09G0380000 | 14.96636   | 52.68055   | -1.8155  | 6.63E-05 |
| OS09G0381600 | 102.87134  | 61.9644    | 0.73133  | 0.04053  |
| OS09G0386200 | 1509.36415 | 998.58959  | 0.59598  | 0.00586  |
| OS09G0392666 | 3150.53941 | 5378.26933 | -0.77154 | 0.00011  |
| OS09G0394700 | 586.72044  | 322.93076  | 0.86145  | 0.00051  |
| OS09G0394900 | 467.88342  | 247.73982  | 0.91732  | 0.00031  |
| OS09G0400400 | 0          | 24.64407   |          | 4.48E-09 |
| OS09G0400500 | 109.08772  | 226.22251  | -1.0523  | 0.00011  |
| OS09G0401300 | 7443.31839 | 4395.16929 | 0.76003  | 0.00026  |
| OS09G0402300 | 513.6845   | 321.69615  | 0.67518  | 0.00577  |
| OS09G0403000 | 30.22222   | 61.98686   | -1.0364  | 0.0204   |
| OS09G0407700 | 304.90022  | 185.64969  | 0.71575  | 0.00475  |
| OS09G0408550 | 39.92208   | 16.73965   | 1.2539   | 0.02486  |
| OS09G0410125 | 389.63873  | 260.1091   | 0.58302  | 0.02954  |
| OS09G0410300 | 777.28974  | 526.64458  | 0.56162  | 0.01996  |
| OS09G0410400 | 210.16844  | 128.01639  | 0.71522  | 0.01408  |
| OS09G0412700 | 115.90441  | 57.94592   | 1.0002   | 0.00932  |
| OS09G0413500 | 144.20934  | 282.76424  | -0.97144 | 8.85E-05 |
| OS09G0414600 | 322.5718   | 195.94318  | 0.71918  | 0.0044   |
| OS09G0417600 | 827.6969   | 92.55998   | 3.1606   | 6.08E-06 |

---

---

|              |            |             |          |          |
|--------------|------------|-------------|----------|----------|
| OS09G0417800 | 691.57322  | 53.07265    | 3.7038   | 0.01222  |
| OS09G0418000 | 624.81801  | 439.41704   | 0.50785  | 0.03376  |
| OS09G0419200 | 4409.04284 | 881.91277   | 2.3218   | 2.62E-10 |
| OS09G0421300 | 41.60743   | 1.83017     | 4.5068   | 0.00038  |
| OS09G0422000 | 2704.96476 | 1953.76193  | 0.46936  | 0.03559  |
| OS09G0425400 | 9.49934    | 0.30688     | 4.9521   | 0.00242  |
| OS09G0426500 | 708.02867  | 227.90018   | 1.6354   | 8.56E-07 |
| OS09G0427300 | 103.3637   | 180.31777   | -0.80281 | 0.02642  |
| OS09G0428600 | 9.97174    | 26.73872    | -1.423   | 0.03438  |
| OS09G0428900 | 200.74313  | 294.18027   | -0.55135 | 0.0486   |
| OS09G0429600 | 93.78547   | 167.36799   | -0.83559 | 0.00487  |
| OS09G0431100 | 43.51333   | 357.08062   | -3.0367  | 1.03E-32 |
| OS09G0432300 | 0.77188    | 35.98598    | -5.5429  | 0.00091  |
| OS09G0434500 | 9715.2231  | 27991.85071 | -1.5267  | 2.14E-17 |
| OS09G0434900 | 10.72486   | 34.94852    | -1.7043  | 0.00258  |
| OS09G0437500 | 516.34417  | 2394.68484  | -2.2134  | 5.84E-32 |
| OS09G0438100 | 1833.96707 | 806.32353   | 1.1855   | 2.18E-09 |
| OS09G0438700 | 138.28131  | 236.5427    | -0.77449 | 0.00305  |
| OS09G0439200 | 114.54311  | 15.60065    | 2.8762   | 0.00537  |
| OS09G0441000 | 48.62317   | 8.3152      | 2.5478   | 1.98E-07 |
| OS09G0441900 | 27.30511   | 9.65159     | 1.5003   | 0.01752  |
| OS09G0442300 | 232.78608  | 505.9763    | -1.1201  | 0.00075  |
| OS09G0442400 | 1.51744    | 11.73693    | -2.9513  | 0.01709  |
| OS09G0444900 | 58.50729   | 15.85022    | 1.8841   | 1.38E-05 |
| OS09G0446000 | 68.78224   | 122.54015   | -0.83315 | 0.01555  |
| OS09G0447300 | 20.98865   | 588.59175   | -4.8096  | 4.15E-16 |
| OS09G0447500 | 0.42353    | 11.2489     | -4.7312  | 0.00186  |

---

---

|              |            |            |          |          |
|--------------|------------|------------|----------|----------|
| OS09G0448200 | 506.03033  | 52.05425   | 3.2811   | 8.01E-14 |
| OS09G0448500 | 5.71763    | 0.24957    | 4.5179   | 0.04948  |
| OS09G0449500 | 0          | 7.47945    |          | 0.00926  |
| OS09G0450300 | 355.82973  | 140.26877  | 1.343    | 0.04039  |
| OS09G0451800 | 39.07246   | 74.2484    | -0.92621 | 0.0291   |
| OS09G0452800 | 770.90441  | 218.82691  | 1.8168   | 1.06E-13 |
| OS09G0453100 | 339.73354  | 553.70675  | -0.70472 | 0.00176  |
| OS09G0453800 | 2093.42628 | 1246.48495 | 0.748    | 0.00023  |
| OS09G0453900 | 1095.03093 | 497.8325   | 1.1372   | 1.34E-08 |
| OS09G0454600 | 201.95484  | 62.75206   | 1.6863   | 1.47E-09 |
| OS09G0455300 | 60.46563   | 19.29017   | 1.6482   | 0.02958  |
| OS09G0455500 | 555.75854  | 337.42205  | 0.7199   | 0.00191  |
| OS09G0456200 | 2852.15401 | 1222.58223 | 1.2221   | 7.60E-11 |
| OS09G0456700 | 798.68816  | 239.11985  | 1.7399   | 1.08E-09 |
| OS09G0458800 | 105.61059  | 64.35662   | 0.71459  | 0.04058  |
| OS09G0458900 | 1219.12308 | 768.78848  | 0.66519  | 0.00242  |
| OS09G0459450 | 40.95841   | 73.10948   | -0.8359  | 0.04802  |
| OS09G0460300 | 883.50565  | 196.89519  | 2.1658   | 8.52E-27 |
| OS09G0460500 | 1790.23187 | 507.5249   | 1.8186   | 8.57E-19 |
| OS09G0460700 | 1300.63427 | 390.73615  | 1.7349   | 2.96E-19 |
| OS09G0461500 | 516.38331  | 58.91316   | 3.1318   | 4.44E-13 |
| OS09G0461700 | 136.42902  | 78.97971   | 0.7886   | 0.01252  |
| OS09G0461900 | 800.99121  | 384.23813  | 1.0598   | 2.83E-07 |
| OS09G0463300 | 95.31162   | 45.58208   | 1.0642   | 0.04379  |
| OS09G0464066 | 100.1471   | 46.64516   | 1.1023   | 0.00113  |
| OS09G0465500 | 326.1054   | 156.76824  | 1.0567   | 1.30E-05 |
| OS09G0465800 | 13.05421   | 33.01098   | -1.3384  | 0.02997  |

---

---

|              |             |             |          |          |
|--------------|-------------|-------------|----------|----------|
| OS09G0466400 | 480.4354    | 301.65752   | 0.67143  | 0.00344  |
| OS09G0468150 | 7.88795     | 34.94277    | -2.1473  | 0.00024  |
| OS09G0468300 | 198.63034   | 125.76685   | 0.65933  | 0.02105  |
| OS09G0469400 | 275.82809   | 151.89323   | 0.86071  | 0.00084  |
| OS09G0469600 | 19.69538    | 4.44414     | 2.1479   | 0.00599  |
| OS09G0470500 | 186.84201   | 379.03511   | -1.0205  | 6.50E-05 |
| OS09G0470900 | 269.81364   | 561.59313   | -1.0576  | 1.50E-06 |
| OS09G0471100 | 165.31962   | 333.55082   | -1.0126  | 0.0062   |
| OS09G0471200 | 0.42353     | 13.3802     | -4.9815  | 0.01018  |
| OS09G0471550 | 39.42085    | 80.03492    | -1.0217  | 0.00676  |
| OS09G0472700 | 39.72657    | 14.6819     | 1.4361   | 0.02038  |
| OS09G0474300 | 122.46915   | 190.15368   | -0.63475 | 0.0323   |
| OS09G0475400 | 3896.1218   | 2744.17768  | 0.50566  | 0.01942  |
| OS09G0475500 | 72.06017    | 132.65754   | -0.88043 | 0.00821  |
| OS09G0478300 | 682.20003   | 145.06864   | 2.2335   | 1.66E-25 |
| OS09G0479000 | 35.89353    | 79.39113    | -1.1453  | 0.00257  |
| OS09G0481200 | 45271.82455 | 30775.76893 | 0.55682  | 0.00654  |
| OS09G0481600 | 29.38148    | 8.60174     | 1.7722   | 0.00419  |
| OS09G0481700 | 596.7333    | 1662.8546   | -1.4785  | 1.27E-14 |
| OS09G0483600 | 24.60104    | 52.9872     | -1.1069  | 0.02486  |
| OS09G0484200 | 14.10052    | 59.04876    | -2.0662  | 3.87E-06 |
| OS09G0484800 | 166.40202   | 93.48259    | 0.8319   | 0.00474  |
| OS09G0484900 | 74.3306     | 24.00847    | 1.6304   | 0.00022  |
| OS09G0487900 | 1246.87957  | 2098.69587  | -0.75117 | 0.0008   |
| OS09G0491708 | 442.72015   | 300.78251   | 0.55767  | 0.02428  |
| OS09G0491740 | 42.5673     | 208.80843   | -2.2944  | 0.00177  |
| OS09G0491820 | 2574.26474  | 952.33157   | 1.4346   | 3.55E-14 |

---



---

|              |            |            |          |          |
|--------------|------------|------------|----------|----------|
| OS09G0494600 | 48.78493   | 145.1722   | -1.5733  | 0.00066  |
| OS09G0498000 | 64.65228   | 107.61112  | -0.73505 | 0.03193  |
| OS09G0504900 | 41.8017    | 80.49308   | -0.9453  | 0.01603  |
| OS09G0505000 | 11.74608   | 53.58047   | -2.1895  | 1.63E-05 |
| OS09G0505800 | 616.56684  | 432.24356  | 0.51241  | 0.0495   |
| OS09G0506800 | 43.66864   | 91.4224    | -1.066   | 0.00322  |
| OS09G0507800 | 435.89833  | 752.14401  | -0.78702 | 0.00026  |
| OS09G0508500 | 30.03308   | 287.65558  | -3.2597  | 4.78E-33 |
| OS09G0508900 | 1196.50142 | 852.10256  | 0.48972  | 0.03433  |
| OS09G0509000 | 432.30474  | 669.16159  | -0.63031 | 0.0062   |
| OS09G0509200 | 312.34969  | 474.70362  | -0.60386 | 0.01385  |
| OS09G0511600 | 7929.62407 | 3856.57503 | 1.0399   | 2.53E-08 |
| OS09G0511700 | 643.73656  | 1208.60032 | -0.90879 | 1.25E-05 |
| OS09G0513800 | 278.57473  | 174.67243  | 0.67341  | 0.01172  |
| OS09G0513900 | 35.67803   | 79.7077    | -1.1597  | 0.00315  |
| OS09G0515300 | 28.34272   | 78.66464   | -1.4727  | 0.00011  |
| OS09G0515500 | 44.79897   | 97.65619   | -1.1242  | 0.00078  |
| OS09G0516600 | 4029.03778 | 2028.2293  | 0.99021  | 2.55E-07 |
| OS09G0517100 | 297.4891   | 152.61308  | 0.96296  | 0.00361  |
| OS09G0517900 | 0          | 5.65866    |          | 0.03771  |
| OS09G0518000 | 83.5997    | 1.78398    | 5.5503   | 9.23E-05 |
| OS09G0519100 | 105.4789   | 15.73561   | 2.7448   | 9.52E-15 |
| OS09G0519200 | 1157.57556 | 779.54916  | 0.57039  | 0.01304  |
| OS09G0520000 | 352.00864  | 186.2276   | 0.91854  | 0.00013  |
| OS09G0520200 | 802.82047  | 458.23583  | 0.80899  | 0.00016  |
| OS09G0525900 | 1715.56204 | 1240.10046 | 0.46822  | 0.04145  |
| OS09G0526700 | 952.68497  | 394.28757  | 1.2728   | 0.00109  |

---

---

|              |            |            |          |          |
|--------------|------------|------------|----------|----------|
| OS09G0527900 | 5741.75513 | 2906.52666 | 0.9822   | 2.53E-07 |
| OS09G0529100 | 966.70632  | 694.69159  | 0.47671  | 0.04993  |
| OS09G0532000 | 894.9036   | 358.08559  | 1.3214   | 0.01598  |
| OS09G0532400 | 1006.02311 | 431.07182  | 1.2227   | 1.22E-09 |
| OS09G0532700 | 2580.19867 | 1319.50362 | 0.96749  | 3.90E-06 |
| OS09G0533300 | 278.4244   | 464.28746  | -0.73773 | 0.00162  |
| OS09G0533400 | 1137.91898 | 1710.6885  | -0.58818 | 0.00627  |
| OS09G0535000 | 4629.21359 | 2047.65688 | 1.1768   | 0.01994  |
| OS09G0536200 | 133.80884  | 250.41221  | -0.90413 | 0.00073  |
| OS09G0536400 | 61.85663   | 28.66672   | 1.1096   | 0.01012  |
| OS09G0536700 | 29.52175   | 89.32444   | -1.5973  | 1.27E-05 |
| OS09G0537700 | 5407.30835 | 151.1088   | 5.1613   | 4.54E-09 |
| OS09G0538000 | 165.38036  | 2.94308    | 5.8123   | 1.16E-06 |
| OS09G0538600 | 19.58266   | 48.83905   | -1.3185  | 0.00475  |
| OS09G0539100 | 2042.14097 | 1071.82914 | 0.93001  | 2.15E-06 |
| OS09G0541100 | 10.0682    | 35.33864   | -1.8114  | 0.00137  |
| OS09G0541600 | 22.88313   | 65.68387   | -1.5213  | 0.00024  |
| OS09G0541700 | 82.75358   | 131.36931  | -0.66673 | 0.048    |
| OS09G0542000 | 110.73552  | 209.86754  | -0.92236 | 0.0006   |
| OS09G0543100 | 1519.65901 | 744.45877  | 1.0295   | 2.28E-07 |
| OS09G0545300 | 150.73651  | 440.38267  | -1.5467  | 4.06E-12 |
| OS09G0547500 | 125.90501  | 274.43395  | -1.1241  | 0.01171  |
| OS09G0549450 | 239.00346  | 146.6879   | 0.70428  | 0.00838  |
| OS09G0551300 | 72.87464   | 135.40566  | -0.8938  | 0.00539  |
| OS09G0551600 | 1033.46929 | 1658.43479 | -0.68233 | 0.00091  |
| OS09G0552300 | 663.52726  | 388.99294  | 0.77041  | 0.00046  |
| OS09G0553100 | 1099.52772 | 2163.36904 | -0.9764  | 1.03E-06 |

---

---

|              |             |             |          |          |
|--------------|-------------|-------------|----------|----------|
| OS09G0553800 | 676.56746   | 345.75719   | 0.96847  | 6.32E-06 |
| OS09G0553900 | 40788.26086 | 21704.70712 | 0.91015  | 8.96E-07 |
| OS09G0555500 | 873.09074   | 459.23241   | 0.92691  | 7.66E-06 |
| OS09G0556400 | 1574.7297   | 1001.5322   | 0.6529   | 0.00197  |
| OS09G0557500 | 153.4196    | 37.55918    | 2.0302   | 0.00935  |
| OS09G0557800 | 490.73433   | 719.11361   | -0.55128 | 0.01698  |
| OS09G0558900 | 349.49966   | 143.06113   | 1.2887   | 4.88E-08 |
| OS09G0559600 | 633.53908   | 407.58267   | 0.63634  | 0.04853  |
| OS09G0561482 | 1.16909     | 10.76087    | -3.2023  | 0.01696  |
| OS09G0563200 | 1543.44837  | 1097.34211  | 0.49214  | 0.03584  |
| OS09G0563300 | 16.64173    | 38.80097    | -1.2213  | 0.0216   |
| OS09G0567201 | 4.69892     | 26.86799    | -2.5155  | 0.00027  |
| OS09G0567300 | 1570.79547  | 1006.33787  | 0.64238  | 0.00316  |
| OS09G0567400 | 919.24248   | 625.47842   | 0.55549  | 0.01613  |
| OS09G0567900 | 22.99836    | 54.93758    | -1.2563  | 0.00656  |
| OS09G0570400 | 2594.6323   | 1293.33336  | 1.0044   | 2.73E-07 |
| OS09G0570800 | 0.34835     | 21.67317    | -5.9592  | 1.73E-06 |
| OS09G0570850 | 3.90449     | 15.11262    | -1.9525  | 0.04794  |
| OS09G0570900 | 52.03399    | 118.62889   | -1.1889  | 0.00026  |
| OS10G0100500 | 96.3229     | 177.98822   | -0.88583 | 0.00193  |
| OS10G0100700 | 4260.81732  | 2319.74795  | 0.87716  | 5.33E-05 |
| OS10G0103700 | 964.04113   | 396.42446   | 1.282    | 1.39E-10 |
| OS10G0103800 | 341.52525   | 182.20406   | 0.90644  | 0.00014  |
| OS10G0110800 | 14.24585    | 2.27201     | 2.6485   | 0.0074   |
| OS10G0113100 | 30.70473    | 11.76854    | 1.3835   | 0.03721  |
| OS10G0113900 | 790.77512   | 1288.28362  | -0.70411 | 0.00122  |
| OS10G0114300 | 26.66119    | 618.45468   | -4.5359  | 9.97E-18 |

---

---

|              |            |            |          |          |
|--------------|------------|------------|----------|----------|
| OS10G0116200 | 97.72379   | 48.58443   | 1.0082   | 0.00404  |
| OS10G0116400 | 173.73729  | 88.53347   | 0.97261  | 0.00296  |
| OS10G0122000 | 22.98842   | 146.96706  | -2.6765  | 3.36E-06 |
| OS10G0131200 | 108.61262  | 239.68635  | -1.142   | 1.38E-05 |
| OS10G0131800 | 35.62037   | 82.83586   | -1.2176  | 0.0008   |
| OS10G0132300 | 76.21643   | 222.4696   | -1.5454  | 7.13E-09 |
| OS10G0132500 | 6.76017    | 34.57148   | -2.3545  | 6.75E-05 |
| OS10G0133500 | 43.45313   | 9.06218    | 2.2615   | 1.07E-05 |
| OS10G0136400 | 482.0736   | 181.51872  | 1.4091   | 1.74E-10 |
| OS10G0141900 | 11.81371   | 28.85362   | -1.2883  | 0.04993  |
| OS10G0142600 | 74.03015   | 173.13999  | -1.2258  | 1.30E-05 |
| OS10G0144700 | 154.85953  | 4.06884    | 5.2502   | 2.79E-05 |
| OS10G0148400 | 187.38694  | 55.71649   | 1.7498   | 1.29E-10 |
| OS10G0154700 | 90.97114   | 17.14428   | 2.4077   | 5.58E-05 |
| OS10G0155300 | 659.00932  | 457.56784  | 0.52631  | 0.03584  |
| OS10G0159800 | 332.02953  | 125.51639  | 1.4034   | 8.45E-09 |
| OS10G0161800 | 1915.40034 | 1242.00629 | 0.62497  | 0.00792  |
| OS10G0162832 | 36.84712   | 85.99312   | -1.2227  | 0.0042   |
| OS10G0162834 | 33.03153   | 65.17361   | -0.98044 | 0.02886  |
| OS10G0163220 | 126.89364  | 214.27407  | -0.75584 | 0.00551  |
| OS10G0163300 | 81.76632   | 142.8043   | -0.80446 | 0.01034  |
| OS10G0167200 | 2.09135    | 12.28779   | -2.5547  | 0.0412   |
| OS10G0167250 | 2.68653    | 25.79955   | -3.2635  | 2.11E-05 |
| OS10G0167700 | 116.44694  | 207.80482  | -0.83556 | 0.00266  |
| OS10G0170300 | 56.21419   | 103.69545  | -0.88335 | 0.01174  |
| OS10G0172600 | 726.54353  | 1056.46551 | -0.54012 | 0.02188  |
| OS10G0177200 | 559.19581  | 312.9321   | 0.8375   | 0.00018  |

---

---

|              |             |             |          |          |
|--------------|-------------|-------------|----------|----------|
| OS10G0180000 | 515.32287   | 271.91531   | 0.92232  | 3.80E-05 |
| OS10G0180800 | 1115.0181   | 3617.62806  | -1.698   | 1.87E-20 |
| OS10G0181100 | 20.61258    | 59.70146    | -1.5342  | 0.00041  |
| OS10G0184200 | 51.91249    | 89.46097    | -0.78518 | 0.03607  |
| OS10G0184250 | 190.38166   | 123.54789   | 0.62382  | 0.04631  |
| OS10G0189100 | 2679.09598  | 1204.65568  | 1.1531   | 1.63E-09 |
| OS10G0190500 | 323.20081   | 117.49081   | 1.4599   | 1.18E-09 |
| OS10G0190900 | 162.51752   | 439.79523   | -1.4362  | 1.95E-10 |
| OS10G0195250 | 3.40955     | 139.51601   | -5.3547  | 1.25E-05 |
| OS10G0198100 | 32.05918    | 10.32652    | 1.6344   | 0.0057   |
| OS10G0198600 | 67.22354    | 117.50644   | -0.8057  | 0.01534  |
| OS10G0209700 | 3292.30216  | 1793.39809  | 0.8764   | 0.00049  |
| OS10G0317900 | 59.67       | 17.27766    | 1.7881   | 0.0139   |
| OS10G0318000 | 55.88962    | 118.93168   | -1.0895  | 0.0011   |
| OS10G0320100 | 378.98855   | 92.24947    | 2.0385   | 8.71E-09 |
| OS10G0322300 | 18.73686    | 62.09692    | -1.7286  | 0.00575  |
| OS10G0327000 | 9.02944     | 44.79087    | -2.3105  | 1.17E-05 |
| OS10G0327800 | 6.19381     | 24.93984    | -2.0096  | 0.00452  |
| OS10G0330400 | 19632.34409 | 12470.10552 | 0.65476  | 0.00091  |
| OS10G0331600 | 0.82075     | 12.03459    | -3.8741  | 0.0034   |
| OS10G0335200 | 43.72378    | 81.58414    | -0.89987 | 0.0205   |
| OS10G0343000 | 588.05441   | 258.37717   | 1.1865   | 2.27E-08 |
| OS10G0343100 | 1406.38256  | 965.76418   | 0.54225  | 0.01671  |
| OS10G0362300 | 2532.80444  | 1694.54221  | 0.57984  | 0.007    |
| OS10G0368100 | 63.52695    | 16.3973     | 1.9539   | 2.51E-06 |
| OS10G0368200 | 19.41716    | 2.7397      | 2.8252   | 0.00198  |
| OS10G0369000 | 141.85732   | 284.1704    | -1.0023  | 4.96E-05 |

---

---

|              |            |            |          |          |
|--------------|------------|------------|----------|----------|
| OS10G0369750 | 486.32219  | 328.8181   | 0.56462  | 0.02681  |
| OS10G0370000 | 1532.71315 | 944.24083  | 0.69886  | 0.00098  |
| OS10G0370400 | 114.35041  | 207.53128  | -0.85987 | 0.00214  |
| OS10G0370500 | 20.21159   | 114.43659  | -2.5013  | 4.49E-13 |
| OS10G0371100 | 118.30505  | 44.43046   | 1.4129   | 9.18E-06 |
| OS10G0371200 | 41.33168   | 83.23837   | -1.01    | 0.00926  |
| OS10G0375600 | 2748.86183 | 1839.76033 | 0.57932  | 0.00656  |
| OS10G0375700 | 305.91886  | 207.31325  | 0.56134  | 0.03581  |
| OS10G0376200 | 5399.39858 | 3049.08691 | 0.82442  | 6.01E-05 |
| OS10G0376900 | 0          | 46.30149   |          | 0.01932  |
| OS10G0377000 | 3.15893    | 21.52883   | -2.7688  | 0.04829  |
| OS10G0377800 | 364.12786  | 635.87307  | -0.80429 | 0.00026  |
| OS10G0378100 | 1290.28952 | 890.52828  | 0.53496  | 0.01917  |
| OS10G0381601 | 0          | 24.60324   |          | 4.16E-08 |
| OS10G0389150 | 72.93624   | 20.72509   | 1.8153   | 0.0033   |
| OS10G0392700 | 160.10942  | 245.72945  | -0.61801 | 0.02605  |
| OS10G0395000 | 82.63338   | 187.17803  | -1.1796  | 2.90E-05 |
| OS10G0395500 | 103.92516  | 174.22762  | -0.74543 | 0.01521  |
| OS10G0403700 | 616.11393  | 352.06346  | 0.80736  | 0.00019  |
| OS10G0405600 | 367.33692  | 232.10424  | 0.66233  | 0.00868  |
| OS10G0406200 | 513.7976   | 323.41526  | 0.66781  | 0.00503  |
| OS10G0406350 | 755.94413  | 427.10827  | 0.82368  | 8.93E-05 |
| OS10G0406900 | 1877.69392 | 817.41996  | 1.1998   | 4.86E-07 |
| OS10G0407000 | 770.08973  | 446.89474  | 0.78509  | 0.0003   |
| OS10G0410700 | 52.78838   | 97.20513   | -0.88081 | 0.01371  |
| OS10G0411700 | 433.95999  | 633.37045  | -0.54549 | 0.02025  |
| OS10G0417800 | 2124.8903  | 1494.66893 | 0.50756  | 0.02292  |

---

---

|              |            |            |          |          |
|--------------|------------|------------|----------|----------|
| OS10G0419400 | 10.22613   | 351.4944   | -5.1032  | 1.99E-44 |
| OS10G0419500 | 2598.05066 | 1492.66172 | 0.79954  | 6.07E-05 |
| OS10G0422300 | 7.51201    | 24.71076   | -1.7179  | 0.01843  |
| OS10G0422600 | 14.07798   | 2.90974    | 2.2745   | 0.02025  |
| OS10G0430200 | 9787.07731 | 3809.80337 | 1.3612   | 4.49E-10 |
| OS10G0431900 | 251.19846  | 369.5977   | -0.55713 | 0.03794  |
| OS10G0434300 | 29.6146    | 64.62842   | -1.1259  | 0.00659  |
| OS10G0437200 | 105.29232  | 206.89584  | -0.9745  | 0.00024  |
| OS10G0440500 | 65.20228   | 156.29773  | -1.2613  | 6.58E-05 |
| OS10G0442900 | 29.45667   | 56.84367   | -0.94841 | 0.03505  |
| OS10G0442950 | 107.5427   | 246.58954  | -1.1972  | 1.88E-06 |
| OS10G0445400 | 1.44225    | 26.12653   | -4.1791  | 1.31E-06 |
| OS10G0445500 | 29.20843   | 64.4397    | -1.1416  | 0.01042  |
| OS10G0445900 | 144.71455  | 247.31982  | -0.77317 | 0.00451  |
| OS10G0446800 | 206.9845   | 461.50839  | -1.1568  | 1.86E-07 |
| OS10G0447600 | 133.31547  | 211.37262  | -0.66494 | 0.02192  |
| OS10G0450800 | 458.61042  | 101.92321  | 2.1698   | 0.00075  |
| OS10G0450900 | 4104.68685 | 1101.35915 | 1.898    | 4.51E-25 |
| OS10G0456900 | 39.41958   | 78.27498   | -0.98964 | 0.0092   |
| OS10G0457000 | 164.1116   | 246.92189  | -0.58938 | 0.04022  |
| OS10G0462100 | 124.32216  | 196.58004  | -0.66103 | 0.02726  |
| OS10G0465800 | 365.68521  | 540.64273  | -0.56407 | 0.02     |
| OS10G0466200 | 10.82132   | 37.56233   | -1.7954  | 0.00122  |
| OS10G0466800 | 401.66175  | 222.41665  | 0.85272  | 0.01347  |
| OS10G0467000 | 85.96901   | 44.14141   | 0.96168  | 0.00679  |
| OS10G0467600 | 336.51171  | 528.0291   | -0.64996 | 0.0073   |
| OS10G0468500 | 581.38203  | 220.23819  | 1.4004   | 3.32E-11 |

---

---

|              |             |            |          |          |
|--------------|-------------|------------|----------|----------|
| OS10G0469700 | 292.71051   | 602.3082   | -1.041   | 9.61E-07 |
| OS10G0470100 | 1334.56335  | 685.83342  | 0.96044  | 2.54E-06 |
| OS10G0473400 | 434.89271   | 194.45677  | 1.1612   | 2.62E-07 |
| OS10G0475100 | 591.17328   | 236.73526  | 1.3203   | 5.35E-06 |
| OS10G0477600 | 11.64206    | 31.65599   | -1.4431  | 0.01872  |
| OS10G0477800 | 77.25786    | 130.39695  | -0.75516 | 0.01868  |
| OS10G0478200 | 3945.73657  | 2464.23923 | 0.67915  | 0.00096  |
| OS10G0478500 | 1.91465     | 12.98842   | -2.7621  | 0.0154   |
| OS10G0479100 | 168.74768   | 84.91364   | 0.9908   | 0.00062  |
| OS10G0481450 | 1046.00535  | 564.52373  | 0.88978  | 1.83E-05 |
| OS10G0482700 | 0           | 13.58184   |          | 6.16E-05 |
| OS10G0483000 | 168.20412   | 269.50293  | -0.68009 | 0.01103  |
| OS10G0483100 | 56.18409    | 101.63619  | -0.85518 | 0.01615  |
| OS10G0484900 | 64.32138    | 128.42442  | -0.99755 | 0.00197  |
| OS10G0485300 | 3835.91114  | 2194.2889  | 0.80582  | 4.24E-05 |
| OS10G0488400 | 3.95714     | 17.08886   | -2.1105  | 0.01909  |
| OS10G0488800 | 3304.35273  | 2351.85719 | 0.49057  | 0.02976  |
| OS10G0489200 | 84.26499    | 155.17818  | -0.88092 | 0.0031   |
| OS10G0490100 | 16.23569    | 56.49808   | -1.799   | 5.77E-05 |
| OS10G0491000 | 447.56382   | 178.59135  | 1.3254   | 0.00641  |
| OS10G0491400 | 58.62379    | 180.08766  | -1.6191  | 4.74E-09 |
| OS10G0491450 | 16.86602    | 70.94901   | -2.0727  | 3.13E-07 |
| OS10G0492101 | 215.83855   | 139.98271  | 0.6247   | 0.03305  |
| OS10G0492200 | 615.48786   | 403.22976  | 0.61013  | 0.00953  |
| OS10G0492300 | 10602.31944 | 5919.05624 | 0.84094  | 0.03035  |
| OS10G0492800 | 800.63948   | 454.52262  | 0.8168   | 0.00013  |
| OS10G0492900 | 377.68711   | 121.20029  | 1.6398   | 5.48E-13 |

---



---

|              |            |            |          |          |
|--------------|------------|------------|----------|----------|
| OS10G0494000 | 1319.10395 | 709.45369  | 0.89478  | 1.22E-05 |
| OS10G0495500 | 49.85867   | 119.85436  | -1.2654  | 6.69E-05 |
| OS10G0495900 | 60.90678   | 168.19072  | -1.4654  | 3.09E-07 |
| OS10G0496900 | 391.82701  | 1242.54827 | -1.665   | 1.40E-17 |
| OS10G0497800 | 173.7437   | 271.93221  | -0.64629 | 0.01702  |
| OS10G0498000 | 38.63131   | 7.43153    | 2.378    | 0.01423  |
| OS10G0498200 | 433.40898  | 248.89854  | 0.80017  | 0.00053  |
| OS10G0498600 | 240.95603  | 354.94253  | -0.55882 | 0.03329  |
| OS10G0499400 | 832.46834  | 329.51875  | 1.337    | 3.66E-11 |
| OS10G0500600 | 2269.22869 | 1422.14721 | 0.67413  | 0.00115  |
| OS10G0502900 | 218.3334   | 143.57235  | 0.60475  | 0.03769  |
| OS10G0503100 | 233.19319  | 148.30895  | 0.65292  | 0.01826  |
| OS10G0503200 | 1194.61061 | 766.63955  | 0.63992  | 0.00361  |
| OS10G0503250 | 969.25126  | 297.64887  | 1.7033   | 0.0005   |
| OS10G0503300 | 418.98554  | 121.28044  | 1.7886   | 0.00847  |
| OS10G0503800 | 3113.17433 | 1320.53226 | 1.2373   | 0.00576  |
| OS10G0504200 | 9.12467    | 35.2111    | -1.9482  | 0.00068  |
| OS10G0507000 | 195.84485  | 309.95968  | -0.66237 | 0.01012  |
| OS10G0510500 | 1255.60314 | 735.53018  | 0.77152  | 0.0021   |
| OS10G0512500 | 21.84438   | 53.1298    | -1.2823  | 0.00653  |
| OS10G0513200 | 658.25667  | 298.2083   | 1.1423   | 0.0002   |
| OS10G0514901 | 26.01197   | 119.64137  | -2.2015  | 4.05E-11 |
| OS10G0516500 | 504.60016  | 352.92113  | 0.51579  | 0.03885  |
| OS10G0516600 | 71.93226   | 26.62433   | 1.4339   | 0.02064  |
| OS10G0516701 | 196.78822  | 63.94829   | 1.6217   | 0.00414  |
| OS10G0516800 | 993.83482  | 700.25364  | 0.50513  | 0.03303  |
| OS10G0517800 | 13.40761   | 31.39357   | -1.2274  | 0.04502  |

---

---

|              |            |            |          |          |
|--------------|------------|------------|----------|----------|
| OS10G0518300 | 264.31909  | 491.51068  | -0.89494 | 4.96E-05 |
| OS10G0520100 | 1.88833    | 11.12506   | -2.5586  | 0.04514  |
| OS10G0521300 | 37.93224   | 74.95803   | -0.98266 | 0.01437  |
| OS10G0521400 | 46.38395   | 14.32157   | 1.6954   | 0.02265  |
| OS10G0522000 | 27.87775   | 160.90897  | -2.5291  | 1.36E-16 |
| OS10G0522601 | 451.34208  | 198.35895  | 1.1861   | 2.08E-06 |
| OS10G0525000 | 3158.60669 | 1887.92934 | 0.74248  | 0.00018  |
| OS10G0525500 | 203.23535  | 82.47696   | 1.3011   | 9.83E-07 |
| OS10G0528100 | 11.09069   | 45.07324   | -2.0229  | 7.71E-05 |
| OS10G0529300 | 281.45398  | 116.25303  | 1.2756   | 0.00403  |
| OS10G0530300 | 23.67756   | 2.32932    | 3.3455   | 1.25E-05 |
| OS10G0530400 | 7820.70855 | 3348.40287 | 1.2238   | 3.84E-11 |
| OS10G0530500 | 8467.50309 | 2771.56351 | 1.6112   | 1.92E-05 |
| OS10G0530750 | 551.36559  | 290.54538  | 0.92425  | 2.17E-05 |
| OS10G0533200 | 556.24815  | 389.86858  | 0.51274  | 0.04022  |
| OS10G0534400 | 68.8824    | 27.28792   | 1.3359   | 0.00091  |
| OS10G0536400 | 430.72987  | 249.22788  | 0.78932  | 0.01054  |
| OS10G0536450 | 307.93242  | 154.08451  | 0.99889  | 2.91E-05 |
| OS10G0537100 | 27.43923   | 0.74872    | 5.1957   | 3.67E-09 |
| OS10G0537600 | 114.91434  | 183.13882  | -0.67238 | 0.02667  |
| OS10G0537800 | 4.24906    | 146.59289  | -5.1085  | 5.71E-09 |
| OS10G0538200 | 2.01238    | 45.52523   | -4.4997  | 0.00269  |
| OS10G0539650 | 143.39496  | 92.31372   | 0.63538  | 0.04913  |
| OS10G0539700 | 4370.11502 | 2407.06977 | 0.86039  | 8.98E-06 |
| OS10G0540200 | 76.25035   | 32.52295   | 1.2293   | 0.00133  |
| OS10G0540300 | 668.86248  | 407.84994  | 0.71367  | 0.00195  |
| OS10G0542900 | 560.8073   | 95.74884   | 2.5502   | 4.10E-05 |

---

---

|              |            |            |          |          |
|--------------|------------|------------|----------|----------|
| OS10G0543400 | 78.37171   | 17.90411   | 2.13     | 1.00E-06 |
| OS10G0543500 | 18.41607   | 49.78706   | -1.4348  | 0.00974  |
| OS10G0545200 | 1745.64978 | 1101.24941 | 0.66462  | 0.006    |
| OS10G0546900 | 19.22548   | 43.14184   | -1.1661  | 0.02326  |
| OS10G0550775 | 2.48856    | 13.61503   | -2.4518  | 0.01817  |
| OS10G0551401 | 95.45086   | 55.17825   | 0.79066  | 0.02682  |
| OS10G0552900 | 44.94174   | 85.68617   | -0.93101 | 0.01328  |
| OS10G0553300 | 191.56191  | 79.54539   | 1.268    | 3.20E-06 |
| OS10G0553600 | 545.73308  | 304.68012  | 0.8409   | 0.00015  |
| OS10G0553800 | 2255.79901 | 700.7819   | 1.6866   | 2.79E-19 |
| OS10G0553900 | 440.96582  | 279.66027  | 0.65699  | 0.007    |
| OS10G0554001 | 642.96247  | 246.21319  | 1.3848   | 9.10E-05 |
| OS10G0558700 | 27.8828    | 63.1529    | -1.1795  | 0.00479  |
| OS10G0558850 | 20.39457   | 67.62236   | -1.7293  | 0.00947  |
| OS10G0559200 | 110.07881  | 49.96535   | 1.1395   | 0.00073  |
| OS10G0559650 | 267.13587  | 160.78325  | 0.73246  | 0.00555  |
| OS10G0559700 | 1191.97987 | 687.96352  | 0.79296  | 0.00021  |
| OS10G0560400 | 6141.25813 | 3683.89043 | 0.7373   | 0.00017  |
| OS10G0561400 | 4580.98298 | 3032.73037 | 0.59504  | 0.00436  |
| OS10G0562100 | 3192.53792 | 1307.80457 | 1.2876   | 8.21E-12 |
| OS10G0562700 | 44.44425   | 20.7232    | 1.1008   | 0.02524  |
| OS10G0562900 | 43.15988   | 136.64511  | -1.6627  | 3.15E-05 |
| OS10G0563400 | 56.95347   | 105.92133  | -0.89514 | 0.00771  |
| OS10G0563600 | 6356.71394 | 3647.66346 | 0.80131  | 2.90E-05 |
| OS10G0564300 | 307.51654  | 489.00288  | -0.66918 | 0.00512  |
| OS10G0564500 | 187.49095  | 444.91377  | -1.2467  | 2.58E-08 |
| OS10G0565000 | 218.08011  | 366.44525  | -0.74874 | 0.00272  |

---

---

|              |             |             |          |          |
|--------------|-------------|-------------|----------|----------|
| OS10G0565150 | 4854.83735  | 783.58068   | 2.6313   | 8.31E-15 |
| OS10G0565200 | 14.22836    | 1.29406     | 3.4588   | 0.00183  |
| OS10G0565500 | 717.6744    | 410.65373   | 0.80541  | 0.00018  |
| OS10G0566400 | 1.19542     | 20.69364    | -4.1136  | 2.14E-05 |
| OS10G0567400 | 10328.28629 | 7445.00774  | 0.47226  | 0.03359  |
| OS10G0567500 | 19.94849    | 66.84856    | -1.7446  | 2.61E-05 |
| OS10G0567900 | 399.68153   | 211.84913   | 0.91581  | 7.78E-05 |
| OS10G0569200 | 474.92854   | 664.85877   | -0.48534 | 0.0494   |
| OS10G0570200 | 8.86158     | 42.65949    | -2.2672  | 0.0006   |
| OS10G0572000 | 26.7225     | 59.75514    | -1.161   | 0.0098   |
| OS10G0572100 | 505.92473   | 279.84922   | 0.85427  | 0.00021  |
| OS10G0572300 | 559.28781   | 905.29141   | -0.69479 | 0.0478   |
| OS10G0572500 | 804.05331   | 530.69749   | 0.5994   | 0.04381  |
| OS10G0573000 | 1533.50177  | 834.04548   | 0.87863  | 1.46E-05 |
| OS10G0573700 | 33960.79501 | 18180.73242 | 0.90146  | 3.00E-06 |
| OS10G0573900 | 245.21358   | 392.18001   | -0.67748 | 0.0075   |
| OS10G0575700 | 526.18249   | 352.42133   | 0.57826  | 0.01689  |
| OS10G0576600 | 75.7692     | 869.178     | -3.52    | 0.00035  |
| OS10G0576900 | 161.43135   | 301.21692   | -0.89988 | 0.00027  |
| OS10G0577700 | 331.6324    | 201.77171   | 0.71686  | 0.00378  |
| OS10G0578200 | 6.28776     | 40.50557    | -2.6875  | 2.05E-06 |
| OS10G0578950 | 1205.22586  | 789.20323   | 0.61083  | 0.00553  |
| OS10G0580001 | 699.3187    | 440.50419   | 0.66679  | 0.00396  |
| OS10G0580550 | 30.48281    | 61.98095    | -1.0238  | 0.0174   |
| OS11G0102200 | 523.83993   | 812.42681   | -0.63311 | 0.00511  |
| OS11G0103700 | 373.96059   | 259.48392   | 0.52724  | 0.04687  |
| OS11G0105400 | 38.04368    | 75.42264    | -0.98734 | 0.01407  |

---

---

|              |             |            |          |          |
|--------------|-------------|------------|----------|----------|
| OS11G0105750 | 7445.3491   | 3437.6807  | 1.1149   | 2.43E-09 |
| OS11G0105800 | 303.84389   | 165.432    | 0.87709  | 0.0005   |
| OS11G0106200 | 2983.98861  | 1942.96086 | 0.61899  | 0.00425  |
| OS11G0106700 | 1534.61292  | 796.40065  | 0.94631  | 0.0006   |
| OS11G0110100 | 68.27728    | 159.84755  | -1.2272  | 1.81E-05 |
| OS11G0114600 | 5162.42555  | 3468.67811 | 0.57366  | 0.00569  |
| OS11G0115350 | 71.7129     | 1297.40042 | -4.1772  | 1.51E-22 |
| OS11G0115400 | 1821.31583  | 2847.63964 | -0.64479 | 0.03786  |
| OS11G0116000 | 19763.84024 | 6422.18668 | 1.6217   | 1.46E-05 |
| OS11G0116300 | 430.96855   | 100.77418  | 2.0965   | 3.95E-06 |
| OS11G0117300 | 201.48864   | 120.66638  | 0.73967  | 0.00765  |
| OS11G0117400 | 329.96457   | 10.62055   | 4.9574   | 3.92E-16 |
| OS11G0117600 | 113.64626   | 1.41979    | 6.3227   | 4.05E-11 |
| OS11G0118500 | 13.13318    | 47.57085   | -1.8569  | 0.00015  |
| OS11G0118950 | 154.67243   | 85.64164   | 0.85283  | 0.00586  |
| OS11G0119100 | 103.2722    | 62.24543   | 0.73041  | 0.04558  |
| OS11G0124500 | 17.97742    | 79.38743   | -2.1427  | 7.27E-08 |
| OS11G0125900 | 521.09188   | 38.15434   | 3.7716   | 0.00031  |
| OS11G0126100 | 25.79018    | 8.22281    | 1.6491   | 0.01532  |
| OS11G0127800 | 2097.01021  | 759.41371  | 1.4654   | 7.07E-10 |
| OS11G0129000 | 30.97533    | 6.66633    | 2.2162   | 0.00026  |
| OS11G0129500 | 49.26722    | 15.07581   | 1.7084   | 0.00017  |
| OS11G0130100 | 92.49245    | 145.55916  | -0.6542  | 0.04714  |
| OS11G0130400 | 25.27396    | 58.356     | -1.2072  | 0.00651  |
| OS11G0132400 | 90.28813    | 38.41667   | 1.2328   | 0.00709  |
| OS11G0134500 | 74.96111    | 121.45356  | -0.69619 | 0.03878  |
| OS11G0135900 | 141.01538   | 86.12067   | 0.71142  | 0.02924  |

---

---

|              |              |             |          |          |
|--------------|--------------|-------------|----------|----------|
| OS11G0138400 | 57.84558     | 7.30406     | 2.9854   | 1.71E-10 |
| OS11G0138600 | 23.74141     | 5.3167      | 2.1588   | 0.02596  |
| OS11G0139700 | 1430.35126   | 2179.6495   | -0.60773 | 0.004    |
| OS11G0140400 | 73.29695     | 127.71747   | -0.80113 | 0.01351  |
| OS11G0142500 | 64.1184      | 142.22446   | -1.1494  | 0.00011  |
| OS11G0144900 | 6.29154      | 23.11731    | -1.8775  | 0.00949  |
| OS11G0145200 | 101.06431    | 332.40124   | -1.7177  | 7.20E-05 |
| OS11G0148300 | 208.57593    | 345.91188   | -0.72983 | 0.00332  |
| OS11G0148500 | 2293.14413   | 1448.76305  | 0.66251  | 0.00162  |
| OS11G0149400 | 4.7741       | 21.34618    | -2.1607  | 0.00466  |
| OS11G0151002 | 145.07538    | 47.43062    | 1.6129   | 2.18E-05 |
| OS11G0151700 | 2238.20974   | 991.1303    | 1.1752   | 6.72E-10 |
| OS11G0153000 | 1.21796      | 16.97772    | -3.8011  | 0.00026  |
| OS11G0154500 | 21.9872      | 55.62379    | -1.339   | 0.00308  |
| OS11G0156300 | 13.43644     | 119.82275   | -3.1567  | 3.37E-18 |
| OS11G0156401 | 388.95442    | 208.64213   | 0.89857  | 0.00014  |
| OS11G0156600 | 7.76012      | 46.9001     | -2.5954  | 6.81E-07 |
| OS11G0157701 | 28.73488     | 8.20247     | 1.8087   | 0.00338  |
| OS11G0158832 | 213.39758    | 330.42969   | -0.6308  | 0.01678  |
| OS11G0160400 | 13.73086     | 1.41979     | 3.2737   | 0.04168  |
| OS11G0163600 | 502.57923    | 292.34521   | 0.78168  | 0.0006   |
| OS11G0163800 | 819.33563    | 481.20492   | 0.7678   | 0.0018   |
| OS11G0167800 | 3091.40535   | 1552.18657  | 0.99396  | 0.03562  |
| OS11G0168600 | 40.95073     | 96.01458    | -1.2294  | 0.00046  |
| OS11G0171300 | 150096.95319 | 84729.60852 | 0.82496  | 1.27E-05 |
| OS11G0171400 | 251.41231    | 147.58828   | 0.76848  | 0.00423  |
| OS11G0173366 | 0            | 7.80131     |          | 0.01196  |

---

---

|              |             |            |          |          |
|--------------|-------------|------------|----------|----------|
| OS11G0173500 | 145.45978   | 402.88082  | -1.4697  | 1.17E-10 |
| OS11G0173600 | 11.96409    | 36.00948   | -1.5897  | 0.00555  |
| OS11G0173900 | 132.50721   | 53.04718   | 1.3207   | 1.97E-05 |
| OS11G0177200 | 120.59572   | 66.26807   | 0.86379  | 0.00704  |
| OS11G0177400 | 434.08249   | 132.0776   | 1.7166   | 1.66E-10 |
| OS11G0177750 | 154.5355    | 43.94969   | 1.814    | 8.55E-07 |
| OS11G0180900 | 47.21352    | 19.97274   | 1.2412   | 0.00821  |
| OS11G0181700 | 272.59515   | 152.49823  | 0.83797  | 0.00124  |
| OS11G0181800 | 1010.60694  | 383.80761  | 1.3968   | 0.00031  |
| OS11G0191400 | 7057.20118  | 4424.36558 | 0.67363  | 0.00072  |
| OS11G0194800 | 18.188      | 46.43051   | -1.3521  | 0.00592  |
| OS11G0199200 | 367.14734   | 546.24218  | -0.57318 | 0.03712  |
| OS11G0200950 | 55.38589    | 100.51934  | -0.85988 | 0.01442  |
| OS11G0205800 | 55.23186    | 110.0009   | -0.99394 | 0.00319  |
| OS11G0207200 | 1418.20833  | 2201.98349 | -0.63473 | 0.00306  |
| OS11G0207400 | 49.75728    | 100.58603  | -1.0155  | 0.00344  |
| OS11G0208900 | 5136.94464  | 2105.69516 | 1.2866   | 7.33E-12 |
| OS11G0209000 | 7190.22287  | 3253.74424 | 1.1439   | 1.21E-05 |
| OS11G0210300 | 339.0907    | 1152.99792 | -1.7656  | 5.43E-19 |
| OS11G0210500 | 1.19542     | 19.47344   | -4.0259  | 3.94E-05 |
| OS11G0214900 | 8.80137     | 1.19418    | 2.8817   | 0.03467  |
| OS11G0216000 | 121.41524   | 69.14485   | 0.81226  | 0.01491  |
| OS11G0216100 | 11448.47158 | 6976.95627 | 0.71449  | 0.00021  |
| OS11G0216300 | 6500.04022  | 4572.17255 | 0.50757  | 0.01957  |
| OS11G0218000 | 2890.47459  | 1574.03565 | 0.87684  | 0.00082  |
| OS11G0219000 | 302.52545   | 196.09279  | 0.62552  | 0.02     |
| OS11G0224900 | 25.67495    | 128.54509  | -2.3238  | 7.82E-13 |

---

---

|              |           |            |          |          |
|--------------|-----------|------------|----------|----------|
| OS11G0225000 | 8.25128   | 60.33097   | -2.8702  | 0.00174  |
| OS11G0226933 | 238.08986 | 1041.99796 | -2.1298  | 5.79E-15 |
| OS11G0226966 | 50.14061  | 152.53306  | -1.6051  | 6.34E-08 |
| OS11G0227000 | 132.84905 | 257.55363  | -0.95508 | 0.00026  |
| OS11G0227100 | 219.08623 | 1737.33317 | -2.9873  | 2.10E-30 |
| OS11G0227800 | 90.39975  | 1235.75066 | -3.7729  | 7.28E-20 |
| OS11G0229333 | 3.78044   | 23.3523    | -2.6269  | 0.01051  |
| OS11G0229500 | 0.77188   | 19.24436   | -4.6399  | 1.47E-05 |
| OS11G0229600 | 9.55199   | 229.36568  | -4.5857  | 2.37E-09 |
| OS11G0232100 | 264.03824 | 117.28548  | 1.1707   | 2.43E-06 |
| OS11G0238000 | 0.34835   | 8.71084    | -4.6442  | 0.01108  |
| OS11G0239500 | 49.38376  | 130.24656  | -1.3991  | 0.00145  |
| OS11G0240800 | 42.17752  | 76.05279   | -0.85053 | 0.03142  |
| OS11G0242400 | 3843.0502 | 2113.47244 | 0.86264  | 7.87E-06 |
| OS11G0243300 | 74.03363  | 20.52573   | 1.8507   | 0.00016  |
| OS11G0243600 | 36.80823  | 69.12381   | -0.90915 | 0.02947  |
| OS11G0245200 | 4.57864   | 20.29058   | -2.1478  | 0.00817  |
| OS11G0245900 | 207.15215 | 322.90265  | -0.64041 | 0.01669  |
| OS11G0246600 | 3.28677   | 15.98518   | -2.282   | 0.01275  |
| OS11G0247000 | 8.48313   | 40.21138   | -2.2449  | 4.45E-05 |
| OS11G0247400 | 107.5689  | 308.42412  | -1.5197  | 2.23E-10 |
| OS11G0256000 | 32.92879  | 70.79151   | -1.1042  | 0.00572  |
| OS11G0256050 | 51.56919  | 108.62194  | -1.0747  | 0.00106  |
| OS11G0256300 | 328.73811 | 502.90346  | -0.61334 | 0.01092  |
| OS11G0256900 | 567.93986 | 1974.51093 | -1.7977  | 0.0002   |
| OS11G0258900 | 13.32864  | 57.66216   | -2.1131  | 7.05E-05 |
| OS11G0260100 | 32.71961  | 116.65479  | -1.834   | 0.02768  |

---



---

|              |            |            |          |          |
|--------------|------------|------------|----------|----------|
| OS11G0262600 | 2.43592    | 87.86134   | -5.1727  | 0.00396  |
| OS11G0263000 | 3.00856    | 19.41266   | -2.6899  | 0.00201  |
| OS11G0265500 | 34.21816   | 63.46002   | -0.89109 | 0.03798  |
| OS11G0265900 | 21.33937   | 65.39211   | -1.6156  | 9.50E-05 |
| OS11G0266000 | 46.2762    | 118.33698  | -1.3546  | 2.20E-05 |
| OS11G0267000 | 2646.22382 | 1407.28371 | 0.91102  | 0.00025  |
| OS11G0278300 | 6.86418    | 164.72762  | -4.5849  | 3.57E-34 |
| OS11G0280600 | 6.83786    | 44.50756   | -2.7024  | 7.62E-07 |
| OS11G0284032 | 408.38954  | 111.22305  | 1.8765   | 2.21E-06 |
| OS11G0284300 | 465.07142  | 126.55433  | 1.8777   | 0.00011  |
| OS11G0285000 | 207.30757  | 47.51788   | 2.1252   | 2.28E-07 |
| OS11G0292050 | 233.66559  | 381.17801  | -0.70602 | 0.00471  |
| OS11G0294600 | 266.22974  | 388.42623  | -0.54497 | 0.03341  |
| OS11G0298400 | 108.28444  | 218.05126  | -1.0098  | 0.00017  |
| OS11G0300600 | 2.4397     | 62.73291   | -4.6844  | 1.93E-10 |
| OS11G0300700 | 3.11007    | 35.88911   | -3.5285  | 1.04E-07 |
| OS11G0303200 | 181.24174  | 267.55058  | -0.5619  | 0.04572  |
| OS11G0305300 | 22.18266   | 94.37628   | -2.089   | 7.79E-09 |
| OS11G0308432 | 29.24749   | 63.98518   | -1.1294  | 0.01469  |
| OS11G0311100 | 453.71133  | 750.57454  | -0.72622 | 0.00312  |
| OS11G0416900 | 2715.67531 | 1148.27106 | 1.2418   | 6.33E-11 |
| OS11G0417400 | 152.08218  | 82.15707   | 0.88839  | 0.00374  |
| OS11G0425800 | 331.92714  | 486.31564  | -0.55103 | 0.0294   |
| OS11G0429100 | 111.29694  | 173.99514  | -0.64463 | 0.03188  |
| OS11G0432400 | 2605.18805 | 1363.52462 | 0.93405  | 1.44E-06 |
| OS11G0433600 | 11.86763   | 31.26247   | -1.3974  | 0.01901  |
| OS11G0439600 | 141.0342   | 53.69752   | 1.3931   | 3.13E-06 |

---

---

|              |            |            |          |          |
|--------------|------------|------------|----------|----------|
| OS11G0440200 | 20.97604   | 4.64926    | 2.1737   | 0.0038   |
| OS11G0440866 | 26.30775   | 0          |          | 0.0146   |
| OS11G0441500 | 561.30471  | 288.74264  | 0.959    | 0.00027  |
| OS11G0444000 | 87.11429   | 33.139     | 1.3944   | 0.00042  |
| OS11G0448000 | 510.85559  | 336.2879   | 0.60322  | 0.00967  |
| OS11G0450050 | 266.75742  | 100.10966  | 1.4139   | 1.47E-08 |
| OS11G0455500 | 1315.70667 | 2707.93399 | -1.0414  | 1.65E-06 |
| OS11G0456100 | 1465.34355 | 990.04619  | 0.56567  | 0.01129  |
| OS11G0465200 | 41.00222   | 75.08225   | -0.87277 | 0.03827  |
| OS11G0472000 | 1677.68775 | 855.41406  | 0.97178  | 1.22E-06 |
| OS11G0474800 | 113.94199  | 34.47735   | 1.7246   | 9.22E-08 |
| OS11G0482200 | 7.0371     | 79.16189   | -3.4918  | 4.21E-15 |
| OS11G0483900 | 53.83707   | 26.43743   | 1.026    | 0.02718  |
| OS11G0484000 | 1920.27646 | 1142.80627 | 0.74873  | 0.00023  |
| OS11G0484700 | 0.42353    | 7.54062    | -4.1541  | 0.03153  |
| OS11G0485200 | 67.19094   | 109.15806  | -0.70008 | 0.04532  |
| OS11G0490100 | 253.87887  | 96.88873   | 1.3897   | 0.0168   |
| OS11G0490300 | 772.66115  | 249.51457  | 1.6307   | 8.74E-16 |
| OS11G0497000 | 171.30133  | 255.9251   | -0.57919 | 0.04039  |
| OS11G0498600 | 106.06657  | 43.19773   | 1.2959   | 0.01384  |
| OS11G0499600 | 76.80558   | 27.53954   | 1.4797   | 0.00563  |
| OS11G0502700 | 42.43056   | 104.64391  | -1.3023  | 0.00318  |
| OS11G0514500 | 133.67397  | 14.74307   | 3.1806   | 8.78E-10 |
| OS11G0516800 | 6.44442    | 0.30688    | 4.3923   | 0.02627  |
| OS11G0518900 | 384.18054  | 167.68482  | 1.196    | 1.55E-07 |
| OS11G0520500 | 76.00355   | 165.34555  | -1.1213  | 0.00017  |
| OS11G0523800 | 7072.9428  | 4038.10906 | 0.80863  | 3.40E-05 |

---

---

|              |            |            |          |          |
|--------------|------------|------------|----------|----------|
| OS11G0525200 | 1835.90781 | 847.95957  | 1.1144   | 1.83E-05 |
| OS11G0526200 | 1588.35718 | 1015.74334 | 0.645    | 0.00263  |
| OS11G0528300 | 910.71284  | 584.92074  | 0.63876  | 0.00374  |
| OS11G0530600 | 123.74804  | 7.52966    | 4.0387   | 0.00094  |
| OS11G0532200 | 309.70833  | 141.67414  | 1.1283   | 0.00114  |
| OS11G0535600 | 289.24473  | 178.82602  | 0.69373  | 0.01906  |
| OS11G0536000 | 145.2945   | 62.209     | 1.2238   | 2.91E-05 |
| OS11G0536400 | 349.02966  | 120.33631  | 1.5363   | 1.38E-05 |
| OS11G0537375 | 4895.3668  | 2970.68845 | 0.72062  | 0.00026  |
| OS11G0540600 | 0.34835    | 7.66635    | -4.4599  | 0.02428  |
| OS11G0542100 | 55.02378   | 16.76913   | 1.7142   | 8.08E-05 |
| OS11G0543100 | 172.47678  | 97.3032    | 0.82584  | 0.00364  |
| OS11G0543500 | 259.27679  | 87.47055   | 1.5676   | 2.17E-10 |
| OS11G0545300 | 997.78387  | 1379.77798 | -0.46764 | 0.04343  |
| OS11G0546900 | 797.53672  | 503.17477  | 0.66449  | 0.00316  |
| OS11G0549469 | 4.66881    | 29.99971   | -2.6838  | 0.0006   |
| OS11G0549900 | 1977.66014 | 1089.83459 | 0.85969  | 1.70E-05 |
| OS11G0550300 | 42.81902   | 91.23739   | -1.0914  | 0.00382  |
| OS11G0550500 | 281.97436  | 413.67073  | -0.55292 | 0.02389  |
| OS11G0557300 | 56.54122   | 105.51419  | -0.90006 | 0.01132  |
| OS11G0557700 | 7.0371     | 37.72125   | -2.4223  | 2.17E-05 |
| OS11G0558200 | 152.03454  | 94.80944   | 0.6813   | 0.03313  |
| OS11G0558900 | 7.24012    | 102.12982  | -3.8182  | 1.53E-20 |
| OS11G0564800 | 5.77405    | 37.15731   | -2.686   | 6.63E-06 |
| OS11G0565000 | 48.86627   | 196.83852  | -2.0101  | 2.65E-13 |
| OS11G0565300 | 245.87524  | 100.99018  | 1.2837   | 3.19E-07 |
| OS11G0565920 | 68.15463   | 155.34664  | -1.1886  | 3.29E-05 |

---

---

|              |            |             |          |          |
|--------------|------------|-------------|----------|----------|
| OS11G0567600 | 6.16371    | 51.14803    | -3.0528  | 5.05E-09 |
| OS11G0567800 | 46.36137   | 182.17191   | -1.9743  | 1.22E-12 |
| OS11G0568300 | 13.25851   | 31.20706    | -1.235   | 0.03722  |
| OS11G0568500 | 56.93848   | 99.18137    | -0.80067 | 0.02239  |
| OS11G0568600 | 66.82633   | 114.64495   | -0.77868 | 0.02239  |
| OS11G0569500 | 23.05606   | 100.03124   | -2.1172  | 2.48E-09 |
| OS11G0569600 | 12.45903   | 49.50816    | -1.9905  | 4.00E-05 |
| OS11G0572100 | 233.88968  | 388.09176   | -0.73057 | 0.00262  |
| OS11G0572800 | 13.43644   | 52.6491     | -1.9703  | 2.85E-05 |
| OS11G0582000 | 252.82446  | 66.47026    | 1.9274   | 4.52E-13 |
| OS11G0582100 | 745.35637  | 1153.21594  | -0.62966 | 0.00586  |
| OS11G0582300 | 291.71063  | 155.55743   | 0.90709  | 0.00032  |
| OS11G0584100 | 5.25028    | 17.82072    | -1.7631  | 0.04045  |
| OS11G0585700 | 49.9215    | 110.14893   | -1.1417  | 0.00116  |
| OS11G0586300 | 1285.17535 | 715.48119   | 0.84498  | 3.77E-05 |
| OS11G0588300 | 674.67033  | 455.0204    | 0.56825  | 0.02223  |
| OS11G0588400 | 168.14725  | 275.94246   | -0.71464 | 0.04687  |
| OS11G0591100 | 647.90478  | 1021.90882  | -0.65741 | 0.00275  |
| OS11G0592000 | 19.49864   | 2.34217     | 3.0575   | 0.0002   |
| OS11G0592300 | 55.02128   | 22.9252     | 1.2631   | 0.00441  |
| OS11G0595200 | 1184.45235 | 720.05181   | 0.71805  | 0.00402  |
| OS11G0599200 | 3403.25699 | 2136.28395  | 0.67181  | 0.0009   |
| OS11G0601700 | 908.88226  | 421.0472    | 1.1101   | 3.78E-08 |
| OS11G0602200 | 603.83779  | 846.3932    | -0.48717 | 0.04289  |
| OS11G0602800 | 364.3192   | 240.86174   | 0.597    | 0.02157  |
| OS11G0603200 | 29182.4697 | 15301.01312 | 0.93147  | 6.48E-07 |
| OS11G0608000 | 96.56719   | 153.42164   | -0.6679  | 0.03861  |

---

---

|              |            |            |          |          |
|--------------|------------|------------|----------|----------|
| OS11G0615100 | 39.48971   | 83.55653   | -1.0813  | 0.00429  |
| OS11G0618500 | 23.53223   | 62.28822   | -1.4043  | 0.00073  |
| OS11G0618700 | 0.39721    | 165.23502  | -8.7004  | 1.01E-48 |
| OS11G0618800 | 2.66021    | 17.12205   | -2.6862  | 0.00443  |
| OS11G0618850 | 13.10435   | 40.00437   | -1.6101  | 0.00193  |
| OS11G0621000 | 100.19372  | 222.99004  | -1.1542  | 1.45E-05 |
| OS11G0621300 | 132.05743  | 236.00786  | -0.83767 | 0.00209  |
| OS11G0621400 | 1321.82878 | 811.65678  | 0.70359  | 0.00297  |
| OS11G0629600 | 92.13272   | 181.23408  | -0.97607 | 0.00066  |
| OS11G0633500 | 155.16855  | 259.60706  | -0.74249 | 0.00543  |
| OS11G0634200 | 215.40603  | 521.72796  | -1.2762  | 3.58E-09 |
| OS11G0634350 | 2.68275    | 26.82559   | -3.3218  | 1.32E-05 |
| OS11G0634500 | 202.57997  | 313.04127  | -0.62786 | 0.01603  |
| OS11G0635500 | 1499.48784 | 719.0011   | 1.0604   | 0.01544  |
| OS11G0644500 | 747.49715  | 354.87385  | 1.0748   | 2.17E-07 |
| OS11G0644600 | 3946.59747 | 1839.36346 | 1.1014   | 2.11E-05 |
| OS11G0644800 | 2226.52884 | 754.17371  | 1.5618   | 3.00E-08 |
| OS11G0648000 | 352.80275  | 233.87694  | 0.59311  | 0.02223  |
| OS11G0649700 | 94.99337   | 466.96207  | -2.2974  | 1.71E-15 |
| OS11G0654800 | 144.36358  | 47.56542   | 1.6017   | 3.90E-08 |
| OS11G0658800 | 177.51661  | 87.24319   | 1.0248   | 0.00027  |
| OS11G0660000 | 1753.2511  | 604.78712  | 1.5355   | 1.54E-15 |
| OS11G0661200 | 218.48985  | 137.61272  | 0.66695  | 0.02045  |
| OS11G0665600 | 79.35545   | 129.73392  | -0.70915 | 0.04563  |
| OS11G0666200 | 6.19381    | 28.67436   | -2.2109  | 0.00082  |
| OS11G0667000 | 3.01233    | 21.06303   | -2.8058  | 0.03122  |
| OS11G0668100 | 60.58603   | 165.52157  | -1.45    | 3.38E-07 |

---

---

|              |              |              |          |          |
|--------------|--------------|--------------|----------|----------|
| OS11G0668650 | 0.69669      | 9.45207      | -3.762   | 0.01795  |
| OS11G0669100 | 96.29025     | 259.21675    | -1.4287  | 1.23E-08 |
| OS11G0671000 | 192.40257    | 513.09356    | -1.4151  | 1.47E-06 |
| OS11G0671100 | 59.36314     | 124.37576    | -1.0671  | 0.00098  |
| OS11G0671950 | 23.10492     | 47.22677     | -1.0314  | 0.03855  |
| OS11G0672200 | 24.59982     | 65.37888     | -1.4102  | 0.00066  |
| OS11G0672300 | 516.77504    | 1535.86297   | -1.5714  | 1.37E-15 |
| OS11G0681400 | 6.56848      | 103.52478    | -3.9783  | 7.12E-12 |
| OS11G0684000 | 73.81579     | 38.7674      | 0.92909  | 0.01644  |
| OS11G0684700 | 83.74109     | 132.73596    | -0.66455 | 0.04301  |
| OS11G0703100 | 217.62635    | 116.59761    | 0.90031  | 0.00078  |
| OS11G0704000 | 10.49929     | 48.80783     | -2.2168  | 0.00109  |
| OS11G0704600 | 414.84734    | 230.16489    | 0.84991  | 0.00027  |
| OS11G0705200 | 127.2269     | 433.48549    | -1.7686  | 4.63E-06 |
| OS11G0705900 | 7.83908      | 22.3038      | -1.5085  | 0.04492  |
| OS11G0707000 | 690952.54594 | 334206.93903 | 1.0478   | 1.08E-08 |
| OS11G0707100 | 86.6007      | 24.18781     | 1.8401   | 0.04256  |
| OS12G0101800 | 527.51652    | 772.26004    | -0.54987 | 0.01853  |
| OS12G0102600 | 1003.66688   | 651.75314    | 0.62288  | 0.00474  |
| OS12G0103000 | 1095.50818   | 774.97195    | 0.49938  | 0.03009  |
| OS12G0104400 | 147.32413    | 34.36077     | 2.1002   | 0.04532  |
| OS12G0105200 | 16.76579     | 40.83263     | -1.2842  | 0.01126  |
| OS12G0105300 | 7781.7511    | 2856.68258   | 1.4458   | 2.41E-15 |
| OS12G0105500 | 63.99948     | 125.9182     | -0.97635 | 0.00233  |
| OS12G0105600 | 86.5782      | 172.92427    | -0.99806 | 0.0202   |
| OS12G0105800 | 163.08265    | 93.91867     | 0.79612  | 0.0077   |
| OS12G0106000 | 1024.49029   | 483.14981    | 1.0844   | 5.61E-08 |

---

---

|              |            |            |          |          |
|--------------|------------|------------|----------|----------|
| OS12G0106700 | 104.86508  | 195.7294   | -0.90033 | 0.00128  |
| OS12G0108200 | 23.22014   | 73.35392   | -1.6595  | 2.17E-05 |
| OS12G0108350 | 13.53417   | 32.5749    | -1.2672  | 0.0395   |
| OS12G0109600 | 14.20076   | 52.05544   | -1.8741  | 7.87E-05 |
| OS12G0109900 | 65.9717    | 109.84182  | -0.73551 | 0.03574  |
| OS12G0110400 | 91.54752   | 159.03593  | -0.79676 | 0.00978  |
| OS12G0114100 | 6337.13619 | 4130.37494 | 0.61756  | 0.00904  |
| OS12G0115050 | 19.30067   | 126.9455   | -2.7175  | 1.18E-15 |
| OS12G0115300 | 8201.69055 | 2531.67005 | 1.6958   | 1.17E-12 |
| OS12G0115700 | 30.24969   | 4.4294     | 2.7717   | 0.04742  |
| OS12G0116000 | 97.42674   | 52.05772   | 0.90421  | 0.01818  |
| OS12G0116600 | 763.77947  | 172.41563  | 2.1473   | 1.22E-17 |
| OS12G0120400 | 127.46865  | 34.68105   | 1.8779   | 3.65E-07 |
| OS12G0121000 | 57.76533   | 30.70965   | 0.91151  | 0.03952  |
| OS12G0122000 | 1013.09865 | 697.28528  | 0.53895  | 0.01579  |
| OS12G0123100 | 104.56425  | 216.30826  | -1.0487  | 6.63E-05 |
| OS12G0123200 | 40.17897   | 191.96359  | -2.2563  | 2.22E-15 |
| OS12G0123500 | 2422.859   | 317.00861  | 2.9341   | 1.98E-05 |
| OS12G0124000 | 3692.46376 | 1648.87277 | 1.1631   | 2.98E-07 |
| OS12G0124100 | 169.95579  | 108.4876   | 0.64763  | 0.04286  |
| OS12G0124300 | 17.19183   | 44.82745   | -1.3827  | 0.00596  |
| OS12G0125400 | 177.94382  | 108.15093  | 0.71838  | 0.02072  |
| OS12G0125500 | 326.47986  | 113.47046  | 1.5247   | 1.68E-10 |
| OS12G0125800 | 16.4863    | 2.2147     | 2.8961   | 0.00172  |
| OS12G0127200 | 29.25487   | 63.62674   | -1.121   | 0.00989  |
| OS12G0129700 | 192.35663  | 372.75181  | -0.95443 | 5.00E-05 |
| OS12G0130200 | 0.42353    | 11.43367   | -4.7547  | 0.00174  |

---

---

|              |            |           |          |          |
|--------------|------------|-----------|----------|----------|
| OS12G0132000 | 1495.60434 | 972.97573 | 0.62025  | 0.02093  |
| OS12G0133050 | 40.66131   | 75.39836  | -0.89088 | 0.03161  |
| OS12G0133100 | 192.52327  | 33.13363  | 2.5387   | 6.90E-16 |
| OS12G0133201 | 65.01552   | 17.77854  | 1.8706   | 3.65E-06 |
| OS12G0134000 | 721.89137  | 437.3292  | 0.72306  | 0.00154  |
| OS12G0134700 | 279.27376  | 157.29269 | 0.82823  | 0.04893  |
| OS12G0134900 | 43.30025   | 18.6306   | 1.2167   | 0.01808  |
| OS12G0135051 | 35.35588   | 3.57718   | 3.3051   | 9.09E-06 |
| OS12G0135100 | 35.35966   | 12.1105   | 1.5458   | 0.00505  |
| OS12G0138900 | 43.69746   | 118.92465 | -1.4444  | 7.59E-06 |
| OS12G0141000 | 3.12883    | 15.13122  | -2.2738  | 0.02023  |
| OS12G0144200 | 249.51533  | 42.86823  | 2.5411   | 2.09E-22 |
| OS12G0145100 | 196.90232  | 124.37527 | 0.66278  | 0.02312  |
| OS12G0145566 | 265.09954  | 536.17922 | -1.0162  | 3.90E-06 |
| OS12G0148600 | 14.1344    | 33.06451  | -1.2261  | 0.03749  |
| OS12G0148700 | 3.26044    | 30.85919  | -3.2426  | 2.03E-06 |
| OS12G0149000 | 213.36613  | 121.44308 | 0.81305  | 0.00302  |
| OS12G0149900 | 1399.34628 | 718.19272 | 0.96231  | 1.84E-06 |
| OS12G0152700 | 624.45191  | 900.78993 | -0.5286  | 0.02738  |
| OS12G0152750 | 198.98111  | 129.76773 | 0.6167   | 0.04303  |
| OS12G0152800 | 1065.80578 | 598.71018 | 0.83201  | 0.00022  |
| OS12G0153900 | 518.86366  | 327.26708 | 0.66489  | 0.00409  |
| OS12G0156100 | 12.85246   | 34.16283  | -1.4104  | 0.01472  |
| OS12G0156400 | 250.52148  | 373.5557  | -0.57639 | 0.02384  |
| OS12G0158700 | 623.97005  | 307.93704 | 1.0188   | 5.50E-05 |
| OS12G0158800 | 411.67199  | 268.80528 | 0.61493  | 0.01639  |
| OS12G0160100 | 49.85374   | 11.51896  | 2.1137   | 7.25E-06 |

---



---

|              |             |             |          |          |
|--------------|-------------|-------------|----------|----------|
| OS12G0166700 | 138.89398   | 230.63622   | -0.73164 | 0.00755  |
| OS12G0168900 | 2448.98957  | 1729.46692  | 0.50186  | 0.02504  |
| OS12G0169000 | 507.17159   | 315.78396   | 0.68354  | 0.00465  |
| OS12G0169400 | 3904.17805  | 1763.25533  | 1.1468   | 1.10E-09 |
| OS12G0169600 | 4890.59172  | 1049.10346  | 2.2209   | 1.00E-33 |
| OS12G0170100 | 100.51439   | 168.02471   | -0.74127 | 0.01415  |
| OS12G0170600 | 174.83765   | 284.20888   | -0.70094 | 0.00692  |
| OS12G0170700 | 32.00781    | 72.80662    | -1.1856  | 0.00257  |
| OS12G0172400 | 3.90071     | 16.229      | -2.0568  | 0.02886  |
| OS12G0175700 | 299.97673   | 457.02087   | -0.60741 | 0.01319  |
| OS12G0175800 | 1.56631     | 21.7918     | -3.7983  | 2.53E-05 |
| OS12G0175900 | 6.81531     | 85.36605    | -3.6468  | 1.62E-16 |
| OS12G0176800 | 149.76917   | 235.5903    | -0.65354 | 0.02058  |
| OS12G0179800 | 424.92366   | 256.46837   | 0.72842  | 0.02729  |
| OS12G0182800 | 54.25568    | 96.59863    | -0.83223 | 0.02592  |
| OS12G0183100 | 3195.64843  | 1426.64653  | 1.1635   | 4.42E-10 |
| OS12G0185900 | 23.33549    | 52.16273    | -1.1605  | 0.01855  |
| OS12G0188500 | 16.91111    | 4.81929     | 1.8111   | 0.04099  |
| OS12G0189300 | 91430.60904 | 26520.70461 | 1.7856   | 3.19E-05 |
| OS12G0189400 | 33133.42466 | 18439.31556 | 0.8455   | 2.47E-05 |
| OS12G0189700 | 1798.1476   | 1090.12777  | 0.72201  | 0.0004   |
| OS12G0190000 | 75975.89149 | 38491.005   | 0.98102  | 1.59E-07 |
| OS12G0190200 | 3400.35974  | 2035.04536  | 0.74063  | 0.00024  |
| OS12G0194100 | 68.67212    | 128.47447   | -0.90369 | 0.00381  |
| OS12G0194266 | 70.33836    | 143.34154   | -1.0271  | 0.00083  |
| OS12G0197200 | 211.21246   | 354.37378   | -0.74658 | 0.00176  |
| OS12G0197700 | 492.57996   | 300.6741    | 0.71216  | 0.02694  |

---

---

|              |            |            |          |          |
|--------------|------------|------------|----------|----------|
| OS12G0198400 | 51.21957   | 90.47748   | -0.82086 | 0.02631  |
| OS12G0199500 | 45.22496   | 10.05661   | 2.169    | 7.96E-06 |
| OS12G0203000 | 47.97552   | 84.62096   | -0.81872 | 0.03184  |
| OS12G0206700 | 407.90797  | 266.60162  | 0.61356  | 0.01396  |
| OS12G0208900 | 260.62118  | 122.29158  | 1.0916   | 2.29E-05 |
| OS12G0208950 | 299.23231  | 146.06154  | 1.0347   | 6.36E-05 |
| OS12G0210400 | 712.43693  | 2671.38063 | -1.9068  | 7.25E-24 |
| OS12G0222300 | 32.5593    | 390.96746  | -3.5859  | 2.62E-09 |
| OS12G0222800 | 9.32642    | 44.9367    | -2.2685  | 1.27E-05 |
| OS12G0222900 | 14.55416   | 54.79379   | -1.9126  | 2.40E-05 |
| OS12G0226400 | 8.13101    | 36.13718   | -2.152   | 0.00017  |
| OS12G0226900 | 13.18204   | 1.96513    | 2.7459   | 0.00949  |
| OS12G0231000 | 835.28656  | 198.16826  | 2.0755   | 0.0032   |
| OS12G0236100 | 29.4039    | 403.8648   | -3.7798  | 0.04153  |
| OS12G0236200 | 0.42353    | 8.17661    | -4.271   | 0.01611  |
| OS12G0236225 | 0          | 71.76691   |          | 0.00096  |
| OS12G0242500 | 441.75299  | 189.88645  | 1.2181   | 2.61E-08 |
| OS12G0244200 | 34.34977   | 87.30933   | -1.3458  | 0.00017  |
| OS12G0247700 | 94.17491   | 0          |          | 2.62E-09 |
| OS12G0257400 | 0          | 7.95101    |          | 0.00542  |
| OS12G0261300 | 229.33878  | 34.13674   | 2.7481   | 4.32E-05 |
| OS12G0263200 | 1614.68728 | 1110.41136 | 0.54016  | 0.01738  |
| OS12G0263600 | 133.87805  | 57.97391   | 1.2074   | 8.44E-05 |
| OS12G0266000 | 64.36141   | 120.64533  | -0.9065  | 0.00802  |
| OS12G0270300 | 513.48354  | 327.69577  | 0.64796  | 0.00588  |
| OS12G0271700 | 960.48447  | 665.37485  | 0.52959  | 0.02954  |
| OS12G0273900 | 94.5562    | 28.36022   | 1.7373   | 9.07E-07 |

---

---

|              |             |             |          |          |
|--------------|-------------|-------------|----------|----------|
| OS12G0277000 | 46.52554    | 249.44223   | -2.4226  | 4.12E-09 |
| OS12G0279000 | 90.10782    | 193.01579   | -1.099   | 4.53E-05 |
| OS12G0281600 | 232.65924   | 71.61638    | 1.6999   | 2.41E-11 |
| OS12G0284850 | 71.76452    | 147.3567    | -1.038   | 0.00055  |
| OS12G0290150 | 1330.61787  | 940.71151   | 0.50027  | 0.02899  |
| OS12G0290200 | 19.06389    | 47.36377    | -1.3129  | 0.00995  |
| OS12G0406000 | 63.06453    | 178.57068   | -1.5016  | 4.93E-07 |
| OS12G0411700 | 50.20829    | 20.20757    | 1.313    | 0.01319  |
| OS12G0417000 | 44.13233    | 90.62923    | -1.0381  | 0.00487  |
| OS12G0420000 | 104.10441   | 44.72931    | 1.2187   | 0.00024  |
| OS12G0420200 | 22423.37332 | 12350.11944 | 0.86048  | 0.00794  |
| OS12G0420400 | 25237.55598 | 15856.35038 | 0.67051  | 0.00467  |
| OS12G0421000 | 786.00887   | 421.26145   | 0.89983  | 0.00035  |
| OS12G0431100 | 253.23447   | 586.77785   | -1.2123  | 1.28E-06 |
| OS12G0433700 | 165.77776   | 22.4851     | 2.8822   | 2.15E-08 |
| OS12G0438300 | 538.45602   | 277.94021   | 0.95405  | 0.00642  |
| OS12G0438400 | 241.87311   | 141.12344   | 0.77729  | 0.00484  |
| OS12G0438600 | 170.38277   | 16.33289    | 3.3829   | 5.53E-10 |
| OS12G0441600 | 2781.68034  | 1160.61719  | 1.2611   | 0.00012  |
| OS12G0441700 | 294.81195   | 459.44115   | -0.64009 | 0.00875  |
| OS12G0443500 | 150.76767   | 321.21664   | -1.0912  | 7.67E-06 |
| OS12G0450300 | 10.25496    | 100.39427   | -3.2913  | 0.00459  |
| OS12G0456200 | 171.93307   | 91.8297     | 0.90481  | 0.00191  |
| OS12G0458100 | 147.39948   | 1.0556      | 7.1255   | 0.02977  |
| OS12G0479400 | 5116.67597  | 2149.63111  | 1.2511   | 1.46E-11 |
| OS12G0479900 | 772.87136   | 515.02961   | 0.58557  | 0.01237  |
| OS12G0481100 | 56.93848    | 105.25231   | -0.88638 | 0.00911  |

---

---

|              |            |            |          |          |
|--------------|------------|------------|----------|----------|
| OS12G0484600 | 468.87829  | 894.7065   | -0.9322  | 3.18E-05 |
| OS12G0484700 | 70.95231   | 154.08924  | -1.1188  | 0.00016  |
| OS12G0489400 | 263.97566  | 147.92299  | 0.83556  | 0.00166  |
| OS12G0492600 | 32.5278    | 93.54969   | -1.5241  | 2.16E-05 |
| OS12G0493900 | 19.7568    | 4.95251    | 1.9961   | 0.02077  |
| OS12G0495525 | 1.49112    | 36.20884   | -4.6019  | 1.14E-06 |
| OS12G0496900 | 28.08833   | 55.79902   | -0.99027 | 0.02947  |
| OS12G0502100 | 45.91915   | 90.98465   | -0.98653 | 0.00674  |
| OS12G0502200 | 137.87399  | 234.23696  | -0.76462 | 0.0042   |
| OS12G0502800 | 3594.01561 | 2324.24018 | 0.62884  | 0.00266  |
| OS12G0507300 | 157.02666  | 270.83191  | -0.78639 | 0.00245  |
| OS12G0507350 | 20.62014   | 48.36939   | -1.23    | 0.01086  |
| OS12G0510000 | 12.60941   | 50.61547   | -2.0051  | 2.91E-05 |
| OS12G0510500 | 8.60341    | 31.3547    | -1.8657  | 0.00205  |
| OS12G0511000 | 672.73035  | 379.84232  | 0.82463  | 0.00013  |
| OS12G0512400 | 22.28923   | 64.88706   | -1.5416  | 0.00014  |
| OS12G0514000 | 1766.02219 | 926.37214  | 0.93084  | 2.10E-06 |
| OS12G0515400 | 2043.83319 | 1392.37277 | 0.55373  | 0.01077  |
| OS12G0515600 | 514.46565  | 757.4033   | -0.55799 | 0.02547  |
| OS12G0518200 | 17.20804   | 2.00021    | 3.1049   | 0.00946  |
| OS12G0527700 | 18.07515   | 89.58134   | -2.3092  | 9.29E-10 |
| OS12G0528801 | 85.16453   | 175.26114  | -1.0412  | 0.00031  |
| OS12G0530000 | 22.66262   | 52.12599   | -1.2017  | 0.009    |
| OS12G0534100 | 199.87195  | 120.6086   | 0.72874  | 0.00955  |
| OS12G0538700 | 166.17362  | 30.20664   | 2.4598   | 0.00239  |
| OS12G0539800 | 0          | 12.84984   |          | 9.42E-05 |
| OS12G0540900 | 140.73327  | 223.89713  | -0.66987 | 0.02011  |

---

---

|              |             |            |          |          |
|--------------|-------------|------------|----------|----------|
| OS12G0541500 | 1838.45808  | 1003.7858  | 0.87304  | 0.00475  |
| OS12G0541700 | 41.32289    | 5.90823    | 2.8061   | 0.00021  |
| OS12G0545900 | 63.19737    | 109.35931  | -0.79114 | 0.0263   |
| OS12G0547600 | 305.39358   | 581.66497  | -0.92952 | 0.00033  |
| OS12G0552400 | 6.51961     | 51.75952   | -2.989   | 5.83E-06 |
| OS12G0552800 | 399.46633   | 137.87419  | 1.5347   | 7.71E-12 |
| OS12G0553800 | 30.05057    | 8.36328    | 1.8453   | 0.002    |
| OS12G0554100 | 174.95288   | 74.96085   | 1.2228   | 1.40E-05 |
| OS12G0555000 | 619.8106    | 252.10844  | 1.2978   | 0.03052  |
| OS12G0555500 | 4982.12457  | 1263.42349 | 1.9794   | 0.00229  |
| OS12G0556200 | 74.86338    | 128.79845  | -0.78278 | 0.01491  |
| OS12G0556500 | 70.36231    | 347.96158  | -2.3061  | 1.24E-21 |
| OS12G0559200 | 12230.31911 | 1370.16536 | 3.158    | 0.01031  |
| OS12G0560300 | 584.2619    | 360.50428  | 0.6966   | 0.00254  |
| OS12G0561900 | 66.16839    | 27.81497   | 1.2503   | 0.01005  |
| OS12G0562100 | 121.58926   | 779.39807  | -2.6803  | 3.39E-23 |
| OS12G0562900 | 132.89699   | 206.54939  | -0.63618 | 0.02828  |
| OS12G0563400 | 129.84437   | 202.01143  | -0.63765 | 0.02758  |
| OS12G0563500 | 60.71514    | 137.47405  | -1.179   | 7.40E-05 |
| OS12G0563600 | 5954.24949  | 3978.17817 | 0.58181  | 0.00589  |
| OS12G0565166 | 16.47131    | 54.42945   | -1.7244  | 0.00016  |
| OS12G0566700 | 1961.25597  | 917.0813   | 1.0967   | 1.83E-08 |
| OS12G0568100 | 145.9861    | 76.04941   | 0.94082  | 0.00186  |
| OS12G0569500 | 3741.13237  | 340.99191  | 3.4557   | 0.00051  |
| OS12G0570700 | 98.81014    | 57.90707   | 0.77092  | 0.03097  |
| OS12G0574900 | 94.39454    | 212.00332  | -1.1673  | 7.71E-06 |
| OS12G0575000 | 13261.85374 | 9078.61484 | 0.54674  | 0.00823  |

---

---

|              |            |            |          |          |
|--------------|------------|------------|----------|----------|
| OS12G0576100 | 175.76509  | 5.0449     | 5.1227   | 0.0231   |
| OS12G0576300 | 670.75709  | 412.47315  | 0.70149  | 0.0027   |
| OS12G0576700 | 29.31627   | 417.09124  | -3.8306  | 9.04E-38 |
| OS12G0576900 | 214.79739  | 138.46729  | 0.63343  | 0.04142  |
| OS12G0577600 | 1759.52334 | 832.90654  | 1.079    | 4.97E-08 |
| OS12G0577700 | 46.3977    | 11.71486   | 1.9857   | 0.0003   |
| OS12G0578400 | 26.18862   | 70.46808   | -1.428   | 0.00065  |
| OS12G0579450 | 18.73936   | 66.60609   | -1.8296  | 9.46E-06 |
| OS12G0582800 | 397.0817   | 274.66821  | 0.53175  | 0.04351  |
| OS12G0583300 | 754.89853  | 93.40091   | 3.0148   | 4.73E-11 |
| OS12G0589100 | 605.59605  | 932.12569  | -0.62217 | 0.03643  |
| OS12G0592200 | 45.82634   | 93.32258   | -1.026   | 0.00457  |
| OS12G0594000 | 457.91513  | 182.49715  | 1.3272   | 0.00867  |
| OS12G0597000 | 182.1552   | 99.64687   | 0.87027  | 0.00144  |
| OS12G0600701 | 3543.54882 | 2582.44644 | 0.45646  | 0.04287  |
| OS12G0603700 | 85.76221   | 208.44533  | -1.2813  | 0.00068  |
| OS12G0603800 | 48.44775   | 21.06531   | 1.2016   | 0.00982  |
| OS12G0604000 | 33.3173    | 63.45632   | -0.92949 | 0.03946  |
| OS12G0604700 | 56.20285   | 12.36945   | 2.1839   | 2.80E-06 |
| OS12G0607100 | 177.58672  | 281.41117  | -0.66416 | 0.01358  |
| OS12G0607400 | 277.88322  | 480.33685  | -0.78957 | 0.00073  |
| OS12G0608500 | 25.21376   | 8.03054    | 1.6506   | 0.01687  |
| OS12G0609200 | 557.94093  | 889.85679  | -0.67346 | 0.00257  |
| OS12G0609500 | 255.24544  | 139.56032  | 0.871    | 0.00847  |
| OS12G0609800 | 32.36121   | 76.39475   | -1.2392  | 0.00096  |
| OS12G0609900 | 7.76262    | 42.97505   | -2.4689  | 8.87E-06 |
| OS12G0610200 | 4202.05543 | 1835.23058 | 1.1951   | 1.47E-10 |

---

---

|              |            |            |          |          |
|--------------|------------|------------|----------|----------|
| OS12G0610250 | 239.04388  | 120.46693  | 0.98864  | 0.00018  |
| OS12G0610600 | 79.4207    | 182.44262  | -1.1999  | 0.00162  |
| OS12G0611100 | 49.59307   | 180.17054  | -1.8612  | 5.44E-07 |
| OS12G0611200 | 45.0056    | 148.6949   | -1.7242  | 7.80E-09 |
| OS12G0613500 | 96.37312   | 166.68903  | -0.79046 | 0.00792  |
| OS12G0615400 | 7199.35169 | 4552.33028 | 0.66126  | 0.00088  |
| OS12G0615900 | 12.13701   | 35.93743   | -1.5661  | 0.00512  |
| OS12G0616800 | 612.89261  | 408.43102  | 0.58554  | 0.01784  |
| OS12G0617250 | 52.55033   | 12.83525   | 2.0336   | 0.00062  |
| OS12G0617800 | 1848.68085 | 773.49778  | 1.257    | 7.22E-11 |
| OS12G0618800 | 3187.67896 | 2235.40793 | 0.51197  | 0.01887  |
| OS12G0620400 | 5646.80128 | 4061.79817 | 0.47532  | 0.03094  |
| OS12G0626400 | 861.04102  | 453.35867  | 0.92543  | 1.81E-05 |
| OS12G0628100 | 1590.22962 | 855.19706  | 0.89491  | 1.06E-05 |
| OS12G0630700 | 361.96     | 238.8892   | 0.59949  | 0.02289  |
| OS12G0631600 | 62.24756   | 102.82848  | -0.72415 | 0.0449   |
| OS12G0631800 | 19.931     | 43.26545   | -1.1182  | 0.02972  |
| OS12G0632000 | 2652.42643 | 4780.57491 | -0.84987 | 1.23E-05 |
| OS12G0632800 | 297.92175  | 1087.29104 | -1.8677  | 2.20E-08 |
| OS12G0632900 | 123.93746  | 75.51888   | 0.7147   | 0.02772  |
| OS12G0634000 | 11.34131   | 29.44318   | -1.3763  | 0.04198  |
| OS12G0634600 | 31.9715    | 157.29667  | -2.2986  | 0.00418  |
| OS12G0634700 | 65.71599   | 25.81059   | 1.3483   | 0.00047  |
| OS12G0637000 | 0.82075    | 10.04549   | -3.6135  | 0.01312  |
| OS12G0637100 | 374.49039  | 616.618    | -0.71945 | 0.0015   |
| OS12G0637300 | 213.15215  | 77.47691   | 1.46     | 2.60E-08 |
| OS12G0637400 | 28.85138   | 7.69221    | 1.9072   | 0.002    |

---

---

|              |            |            |          |          |
|--------------|------------|------------|----------|----------|
| OS12G0638700 | 109.63651  | 66.55279   | 0.72016  | 0.04563  |
| OS12G0639100 | 159.87243  | 248.95285  | -0.63895 | 0.02687  |
| OS12G0639600 | 10.2474    | 141.09064  | -3.7833  | 3.44E-17 |
| OS12G0641400 | 2244.85558 | 1303.90496 | 0.78378  | 9.72E-05 |

---

257 Corrected pValue (Padj)< 0.05

258

259

260

261

262

263

264

265

266

267

268

269

270

271

272

273

274

275

276

277

278

279

280

281



282 Supplementary Table 5  
 283 The Gene Ontology (GO)-biological process assignments and their enrichment

| GO accession | Description                                                                             | Term type          | Corrected pValue | Up Gene | Down Gene |
|--------------|-----------------------------------------------------------------------------------------|--------------------|------------------|---------|-----------|
| GO:0008152   | metabolic process                                                                       | biological_process | 0.0002           | 1157    | 960       |
| GO:0016614   | "oxidoreductase activity, acting on CH-OH group of donors"                              | molecular_function | 0.00021          | 73      | 37        |
| GO:0016616   | "oxidoreductase activity, acting on the CH-OH group of donors, NAD or NADP as acceptor" | molecular_function | 0.00021          | 72      | 33        |
| GO:0048037   | cofactor binding                                                                        | molecular_function | 0.0016           | 115     | 54        |
| GO:0050662   | coenzyme binding                                                                        | molecular_function | 0.0016           | 96      | 40        |
| GO:0044237   | cellular metabolic process                                                              | biological_process | 0.0016           | 791     | 755       |
| GO:0009058   | biosynthetic process                                                                    | biological_process | 0.0016           | 514     | 423       |
| GO:0051287   | NAD binding                                                                             | molecular_function | 0.00325          | 24      | 14        |
| GO:0006787   | porphyrin-containing compound catabolic process                                         | biological_process | 0.00452          | 16      | 4         |
| GO:0033015   | tetrapyrrole catabolic process                                                          | biological_process | 0.00452          | 16      | 4         |
| GO:0051187   | cofactor catabolic process                                                              | biological_process | 0.00583          | 16      | 4         |
| GO:0046149   | pigment catabolic process                                                               | biological_process | 0.0076           | 15      | 4         |
| GO:1901576   | organic substance biosynthetic process                                                  | biological_process | 0.00901          | 471     | 409       |
| GO:0042440   | pigment metabolic process                                                               | biological_process | 0.00901          | 55      | 17        |
| GO:0015996   | chlorophyll catabolic process                                                           | biological_process | 0.00924          | 14      | 4         |
| GO:0047746   | chlorophyllase activity                                                                 | molecular_function | 0.00924          | 14      | 4         |
| GO:0006720   | isoprenoid metabolic process                                                            | biological_process | 0.01066          | 31      | 3         |
| GO:0008299   | isoprenoid biosynthetic process                                                         | biological_process | 0.01066          | 31      | 3         |
| GO:0003735   | structural constituent of ribosome                                                      | molecular_function | 0.01066          | 37      | 84        |
| GO:0005840   | ribosome                                                                                | cellular_component | 0.01066          | 37      | 84        |
| GO:0044249   | cellular biosynthetic process                                                           | biological_process | 0.01857          | 451     | 398       |
| GO:0010467   | gene expression                                                                         | biological_process | 0.02232          | 320     | 339       |
| GO:0006694   | steroid biosynthetic process                                                            | biological_process | 0.02263          | 31      | 8         |

---

|            |                                                                                                      |                    |         |      |      |
|------------|------------------------------------------------------------------------------------------------------|--------------------|---------|------|------|
|            | 3-beta-hydroxy-delta5-steroid dehydrogenase                                                          |                    |         |      |      |
| GO:0003854 | activity                                                                                             | molecular_function | 0.02263 | 30   | 8    |
| GO:0016229 | steroid dehydrogenase activity                                                                       | molecular_function | 0.02263 | 30   | 8    |
|            | "steroid dehydrogenase activity, acting on the<br>CH-OH group of donors, NAD or NADP as<br>acceptor" |                    |         |      |      |
| GO:0033764 |                                                                                                      | molecular_function | 0.02263 | 30   | 8    |
| GO:0019725 | cellular homeostasis                                                                                 | biological_process | 0.0236  | 29   | 12   |
| GO:0008150 | biological_process                                                                                   | biological_process | 0.02477 | 1475 | 1203 |
| GO:0030529 | ribonucleoprotein complex                                                                            | cellular_component | 0.02477 | 44   | 98   |
| GO:0008202 | steroid metabolic process                                                                            | biological_process | 0.02477 | 31   | 8    |
| GO:0051186 | cofactor metabolic process                                                                           | biological_process | 0.02477 | 65   | 31   |
| GO:0006412 | translation                                                                                          | biological_process | 0.02477 | 50   | 111  |
| GO:0016491 | oxidoreductase activity                                                                              | molecular_function | 0.02773 | 294  | 156  |
| GO:0003824 | catalytic activity                                                                                   | molecular_function | 0.02804 | 1085 | 857  |
| GO:0006721 | terpenoid metabolic process                                                                          | biological_process | 0.02804 | 24   | 3    |
| GO:0016114 | terpenoid biosynthetic process                                                                       | biological_process | 0.02804 | 24   | 3    |
| GO:0042254 | ribosome biogenesis                                                                                  | biological_process | 0.0406  | 8    | 25   |
| GO:0071704 | organic substance metabolic process                                                                  | biological_process | 0.06013 | 888  | 801  |
| GO:0050801 | ion homeostasis                                                                                      | biological_process | 0.07901 | 7    | 3    |
| GO:0055065 | metal ion homeostasis                                                                                | biological_process | 0.07901 | 7    | 3    |
| GO:0055080 | cation homeostasis                                                                                   | biological_process | 0.07901 | 7    | 3    |
| GO:0043170 | macromolecule metabolic process                                                                      | biological_process | 0.07901 | 627  | 675  |
| GO:0034645 | cellular macromolecule biosynthetic process                                                          | biological_process | 0.07901 | 339  | 338  |
| GO:0044255 | cellular lipid metabolic process                                                                     | biological_process | 0.08075 | 128  | 46   |
| GO:0008610 | lipid biosynthetic process                                                                           | biological_process | 0.08119 | 112  | 42   |
| GO:0044238 | primary metabolic process                                                                            | biological_process | 0.08119 | 840  | 785  |
| GO:0034470 | ncRNA processing                                                                                     | biological_process | 0.09036 | 38   | 38   |
| GO:0006778 | porphyrin-containing compound metabolic process                                                      | biological_process | 0.09036 | 44   | 14   |

---

---

|            |                                                                          |                    |         |     |     |
|------------|--------------------------------------------------------------------------|--------------------|---------|-----|-----|
| GO:0042592 | homeostatic process                                                      | biological_process | 0.09036 | 31  | 15  |
| GO:0009059 | macromolecule biosynthetic process                                       | biological_process | 0.09036 | 341 | 340 |
| GO:0016052 | carbohydrate catabolic process                                           | biological_process | 0.09036 | 32  | 10  |
| GO:0022613 | ribonucleoprotein complex biogenesis                                     | biological_process | 0.09528 | 8   | 25  |
| GO:0016903 | "oxidoreductase activity, acting on the aldehyde or oxo group of donors" | molecular_function | 0.10889 | 17  | 6   |
| GO:0003857 | 3-hydroxyacyl-CoA dehydrogenase activity                                 | molecular_function | 0.11135 | 16  | 7   |
| GO:0006629 | lipid metabolic process                                                  | biological_process | 0.11751 | 189 | 70  |
| GO:0004455 | ketol-acid reductoisomerase activity                                     | molecular_function | 0.11763 | 7   | 4   |
| GO:0006873 | cellular ion homeostasis                                                 | biological_process | 0.12059 | 6   | 3   |
| GO:0006875 | cellular metal ion homeostasis                                           | biological_process | 0.12059 | 6   | 3   |
| GO:0030003 | cellular cation homeostasis                                              | biological_process | 0.12059 | 6   | 3   |
| GO:0004013 | adenosylhomocysteinase activity                                          | molecular_function | 0.12059 | 0   | 3   |
| GO:0016801 | "hydrolase activity, acting on ether bonds"                              | molecular_function | 0.12059 | 0   | 3   |
| GO:0016802 | trialkylsulfonium hydrolase activity                                     | molecular_function | 0.12059 | 0   | 3   |
| GO:0016829 | lyase activity                                                           | molecular_function | 0.12086 | 67  | 26  |
| GO:0016846 | carbon-sulfur lyase activity                                             | molecular_function | 0.12327 | 9   | 2   |
| GO:0019069 | viral capsid assembly                                                    | biological_process | 0.12327 | 11  | 7   |
| GO:0003913 | DNA photolyase activity                                                  | molecular_function | 0.12451 | 4   | 1   |
| GO:0044260 | cellular macromolecule metabolic process                                 | biological_process | 0.12464 | 548 | 635 |
| GO:0004576 | oligosaccharyl transferase activity                                      | molecular_function | 0.12627 | 1   | 4   |
| GO:0019538 | protein metabolic process                                                | biological_process | 0.13425 | 301 | 387 |
| GO:0004779 | sulfate adenylyltransferase activity                                     | molecular_function | 0.14065 | 2   | 1   |
| GO:0004781 | sulfate adenylyltransferase (ATP) activity                               | molecular_function | 0.14065 | 2   | 1   |
| GO:0015994 | chlorophyll metabolic process                                            | biological_process | 0.15505 | 30  | 11  |
| GO:0045454 | cell redox homeostasis                                                   | biological_process | 0.16188 | 23  | 9   |
| GO:0001071 | nucleic acid binding transcription factor activity                       | molecular_function | 0.17458 | 105 | 81  |
| GO:0003700 | sequence-specific DNA binding transcription                              | molecular_function | 0.17458 | 105 | 81  |

---

---

| factor activity |                                                                                                 |                    |         |      |     |
|-----------------|-------------------------------------------------------------------------------------------------|--------------------|---------|------|-----|
| GO:0006732      | coenzyme metabolic process                                                                      | biological_process | 0.19135 | 25   | 19  |
| GO:0044267      | cellular protein metabolic process                                                              | biological_process | 0.19931 | 220  | 350 |
| GO:0055114      | oxidation-reduction process                                                                     | biological_process | 0.19969 | 267  | 150 |
| GO:0005509      | calcium ion binding                                                                             | molecular_function | 0.23067 | 48   | 33  |
| GO:0006487      | protein N-linked glycosylation                                                                  | biological_process | 0.23067 | 4    | 2   |
| GO:0044710      | single-organism metabolic process                                                               | biological_process | 0.23422 | 494  | 281 |
| GO:0016108      | tetraterpenoid metabolic process                                                                | biological_process | 0.23422 | 18   | 2   |
| GO:0016109      | tetraterpenoid biosynthetic process                                                             | biological_process | 0.23422 | 18   | 2   |
| GO:0016116      | carotenoid metabolic process                                                                    | biological_process | 0.23422 | 18   | 2   |
| GO:0016117      | carotenoid biosynthetic process                                                                 | biological_process | 0.23422 | 18   | 2   |
| GO:0008652      | cellular amino acid biosynthetic process                                                        | biological_process | 0.23422 | 32   | 24  |
| GO:0008661      | 1-deoxy-D-xylulose-5-phosphate synthase activity                                                | molecular_function | 0.25726 | 4    | 1   |
|                 | "transferase activity, transferring aldehyde or ketonic groups"                                 | molecular_function | 0.25726 | 4    | 1   |
|                 | "oxidoreductase activity, acting on the aldehyde or oxo group of donors, disulfide as acceptor" | molecular_function | 0.26023 | 5    | 1   |
| GO:0004435      | phosphatidylinositol phospholipase C activity                                                   | molecular_function | 0.26369 | 4    | 0   |
| GO:0048878      | chemical homeostasis                                                                            | biological_process | 0.28615 | 7    | 3   |
| GO:1901362      | organic cyclic compound biosynthetic process                                                    | biological_process | 0.29554 | 304  | 224 |
| GO:0055082      | cellular chemical homeostasis                                                                   | biological_process | 0.30309 | 6    | 3   |
| GO:0006364      | rRNA processing                                                                                 | biological_process | 0.30309 | 6    | 17  |
| GO:0016072      | rRNA metabolic process                                                                          | biological_process | 0.30309 | 6    | 17  |
| GO:0009987      | cellular process                                                                                | biological_process | 0.31103 | 1070 | 934 |
| GO:0008430      | selenium binding                                                                                | molecular_function | 0.36932 | 4    | 8   |
| GO:0033013      | tetrapyrrole metabolic process                                                                  | biological_process | 0.37032 | 51   | 15  |
|                 | dolichyl-diphosphooligosaccharide-protein glycotransferase activity                             | molecular_function | 0.37675 | 1    | 3   |

---

---

|            |                                                             |                    |         |     |     |
|------------|-------------------------------------------------------------|--------------------|---------|-----|-----|
| GO:0009108 | coenzyme biosynthetic process                               | biological_process | 0.39022 | 15  | 13  |
| GO:0015276 | ligand-gated ion channel activity                           | molecular_function | 0.39022 | 8   | 6   |
| GO:0022834 | ligand-gated channel activity                               | molecular_function | 0.39022 | 8   | 6   |
| GO:0050794 | regulation of cellular process                              | biological_process | 0.41005 | 327 | 250 |
| GO:0016070 | RNA metabolic process                                       | biological_process | 0.41768 | 278 | 260 |
| GO:0015035 | protein disulfide oxidoreductase activity                   | molecular_function | 0.42933 | 15  | 3   |
| GO:0015036 | disulfide oxidoreductase activity                           | molecular_function | 0.42933 | 15  | 3   |
| GO:0072524 | pyridine-containing compound metabolic process              | biological_process | 0.42971 | 12  | 8   |
| GO:0004629 | phospholipase C activity                                    | molecular_function | 0.44633 | 4   | 0   |
| GO:0034660 | ncRNA metabolic process                                     | biological_process | 0.44861 | 41  | 53  |
| GO:0031012 | extracellular matrix                                        | cellular_component | 0.45116 | 19  | 13  |
| GO:0036355 | 2-iminoacetate synthase activity                            | molecular_function | 0.45116 | 6   | 1   |
| GO:0006230 | TMP biosynthetic process                                    | biological_process | 0.45367 | 1   | 2   |
| GO:0046044 | TMP metabolic process                                       | biological_process | 0.45367 | 1   | 2   |
| GO:0044421 | extracellular region part                                   | cellular_component | 0.45367 | 61  | 46  |
| GO:0070085 | glycosylation                                               | biological_process | 0.46532 | 27  | 13  |
| GO:0004488 | methylenetetrahydrofolate dehydrogenase<br>(NADP+) activity | molecular_function | 0.47196 | 3   | 3   |
| GO:0006007 | glucose catabolic process                                   | biological_process | 0.47196 | 21  | 7   |
| GO:0019320 | hexose catabolic process                                    | biological_process | 0.47196 | 21  | 7   |
| GO:0042025 | host cell nucleus                                           | cellular_component | 0.47196 | 37  | 24  |
| GO:0044724 | single-organism carbohydrate catabolic process              | biological_process | 0.47196 | 26  | 8   |
| GO:0008831 | dTDP-4-dehydrorhamnose reductase activity                   | molecular_function | 0.47196 | 15  | 4   |
| GO:0006050 | mannosamine metabolic process                               | biological_process | 0.47196 | 5   | 1   |
| GO:0006051 | N-acetylmannosamine metabolic process                       | biological_process | 0.47196 | 5   | 1   |
| GO:0047465 | N-acylglucosamine-6-phosphate 2-epimerase<br>activity       | molecular_function | 0.47196 | 5   | 1   |
| GO:0046148 | pigment biosynthetic process                                | biological_process | 0.47631 | 39  | 12  |

---

---

|            |                                                     |                    |         |     |    |
|------------|-----------------------------------------------------|--------------------|---------|-----|----|
| GO:0044723 | single-organism carbohydrate metabolic process      | biological_process | 0.47664 | 110 | 59 |
| GO:0008135 | "translation factor activity, nucleic acid binding" | molecular_function | 0.47664 | 9   | 13 |
| GO:0000272 | polysaccharide catabolic process                    | biological_process | 0.49517 | 10  | 2  |

---

284 Corrected pValue < 0.05

285

286

287

288

289

290

291

292

293

294

295

296

297

298

299

300

301

302

303

304

305

306

307

308

309

310 Supplemental Table S6

311 Examples of the DEGs in *OsDETI* RNAi plants that are predicted to be involved in  
 312 photosynthesis and thylakoid

| Geneid       | log2FoldChange | Associated Gene Name | Description                                         |
|--------------|----------------|----------------------|-----------------------------------------------------|
| OS01G0938100 | 0.93149        | PSB28                | Photosystem II Psb28, class 1                       |
| OS07G0556200 | 0.79382        | PETC                 | Rieske iron-sulphur protein.                        |
| OS09G0481200 | 0.55682        | P0463D04.20          | Photosystem I PsuG/PsuK protein                     |
| OS12G0189400 | 0.8455         |                      | Photosystem I PsuN, reaction centre subunit N       |
| OS07G0188233 | 0.86861        | OSJNBB0084L07.18     |                                                     |
| OS02G0654300 | 2.3165         | OJ1003_B06.5         |                                                     |
| OS03G0279950 | 0.94847        | OS03G0279950         | Photosystem II PsbP, oxygen evolving complex        |
| OS03G0731100 | 0.96985        | OS03G0731100         | Photosystem I PsuN, reaction centre subunit N       |
| OS08G0200300 | 0.82423        | P0556A11.19          | Photosystem II PsbR                                 |
| OS07G0186000 | 1.1085         | TRXH                 | Thioredoxin                                         |
| OS12G0190200 | 0.74063        |                      | Photosystem II PsbP                                 |
| OS06G0191300 | 0.61872        | OSJNBA0090D06.37-1   | Protein kinase domain                               |
| OS04G0476800 | 0.71231        | OSJNBA0044K18.2      | Phox/Bem1p  Zinc finger, ZZ-type                    |
| OS07G0141400 | 0.61651        | OJ1351_C05.112       | Photosystem II PsbP                                 |
| OS03G0203200 | 0.45957        | D14                  | Alpha/Beta hydrolase fold                           |
| OS03G0129300 | 0.90348        | OS03G0129300         | Domain of unknown function CP12                     |
| OS07G0148900 | 0.8053         | P0022E03.39          | Photosystem I PsuG/PsuK protein                     |
| OS12G0420400 | 0.67051        |                      | Photosystem I PsuL, reaction centre subunit XI      |
| OS06G0711100 | 0.58675        | P0655A07.33          |                                                     |
| OS01G0934400 | 1.1437         | Photosystem II PsbP  |                                                     |
| OS03G0802600 | -2.9331        | OSJNBA0087C10.13     | AAA+ ATPase domain                                  |
| OS02G0592600 | -0.69566       | OSJNBA0016G10.15-1   | Phospholipase C                                     |
| OS08G0564700 | -0.86388       |                      | Protein kinase domain                               |
| OS08G0113300 | -0.89063       | P0427G12.1           | Tetratricopeptide-like helical                      |
| OS05G0414200 | -0.6855        | P0017D10.15          | P-loop containing nucleoside triphosphate hydrolase |
| OS12G0123100 | -1.0487        |                      |                                                     |
| OS09G0334500 | -0.80547       | OJ1253_E02.7         | DNA-binding WRKY                                    |
| OS01G0184200 | -0.71121       |                      |                                                     |
| OS09G0123300 | -0.92306       | P0415D04.48          | Protein kinase domain                               |
| OS01G0778800 | -0.57356       | P0010B10.6           | Peptidase M16, zinc-binding site                    |
| OS09G0345300 | -0.93388       | OSJNBB0085I16.18     | Leucine-rich repeat                                 |
| OS03G0244700 | -1.7651        | OS03G0244700         | Armadillo                                           |
| OS07G0537600 | -4.6698        | OJ1058_A12.140       | Protein kinase domain                               |
| OS08G0113600 | -3.6723        | P0427G12.5           |                                                     |
| OS06G0269300 | -0.74466       | OSJNBA0084K06.11     | NHL repeat                                          |
| OS04G0450400 | -0.60466       | OSJNBA0086B14.5      | Zinc finger, RING-type                              |
| OS01G0589800 | 0.62074        |                      | Chlorophyll A-B binding protein                     |
| OS02G0197600 | 0.84211        | P0026H03.3-2         | Chlorophyll A-B binding protein                     |
| OS03G0240500 | -0.97545       | OS03G0240500         | Chloroplast protein import component Toc34          |

---

---

OS03G0835100

0.52365

OSJNBA0096106.18

Chloroplast protein import component Toc86/159

---

313

314

315

316

317

318

319

320

321

322

323

324

325

326

327

328

329

330

331

332

333

334

335

336

337

338

339

340

341



342 Supplemental Table S7.

343 DEGs KEGG pathway enrichment results

---

| Pathway                                     | Pathway ID | DEGs with pathway annotation | All genes with pathway annotation | Corrected P Value |
|---------------------------------------------|------------|------------------------------|-----------------------------------|-------------------|
| Biosynthesis of secondary metabolites       | osa01110   | 226                          | 779                               | 0.07412           |
| Pyruvate metabolism                         | osa00620   | 29                           | 75                                | 0.48481           |
| Carbon metabolism                           | osa01200   | 69                           | 225                               | 0.48481           |
| Pentose phosphate pathway                   | osa00030   | 20                           | 48                                | 0.48481           |
| Cyanoamino acid metabolism                  | osa00460   | 16                           | 36                                | 0.48481           |
| Plant hormone signal transduction           | osa04075   | 57                           | 184                               | 0.48481           |
| Terpenoid backbone biosynthesis             | osa00900   | 19                           | 47                                | 0.48481           |
| Carotenoid biosynthesis                     | osa00906   | 12                           | 26                                | 0.48481           |
| Glycolysis / Gluconeogenesis                | osa00010   | 38                           | 119                               | 0.48481           |
| Degradation of aromatic compounds           | osa01220   | 7                            | 12                                | 0.48481           |
| Ribosome biogenesis in eukaryotes           | osa03008   | 30                           | 90                                | 0.48481           |
| Linoleic acid metabolism                    | osa00591   | 8                            | 15                                | 0.48481           |
| Carbon fixation in photosynthetic organisms | osa00710   | 26                           | 77                                | 0.48481           |
| Sulfur metabolism                           | osa00920   | 14                           | 35                                | 0.48481           |
| Flavonoid biosynthesis                      | osa00941   | 9                            | 19                                | 0.48481           |

---

344 Corrected pValue < 0.05

345
